# Supplementary material for: Co-expression based cancer staging and application
Source: Sci Rep. 2020 Jun 30;10:10624. doi: 10.1038/s41598-020-67476-7 (PMC7327081; doi:10.1038/s41598-020-67476-7)
Supplement: Supplementary file 1 — Supplementary file1 [file 41598_2020_67476_MOESM1_ESM.xlsx]

## Sheet: Sheet1
Disappeared pathways	The number of cancer types
neutral lipid metabolic process	6
triglyceride metabolic process	5
acylglycerol metabolic process	5
response to drug	4
regulation of lipid localization	4
regulation of hormone levels	4
organic anion transport	4
terpenoid metabolic process	3
sodium ion homeostasis	3
retinoid metabolic process	3
response to nutrient levels	3
response to extracellular stimulus	3
response to BMP	3
renal system process	3
regulation of intestinal absorption	3
regulation of blood vessel size	3
regulation of blood pressure	3
positive regulation of ion transmembrane transport	3
organic hydroxy compound transport	3
negative regulation of blood vessel diameter	3
muscle tissue development	3
multicellular organismal homeostasis	3
lipoprotein metabolic process	3
lipid catabolic process	3
isoprenoid metabolic process	3
intermediate filament-based process	3
intermediate filament cytoskeleton organization	3
glycerolipid catabolic process	3
drug metabolic process	3
digestion	3
dicarboxylic acid transport	3
chloride transport	3
chloride transmembrane transport	3
cellular response to BMP stimulus	3
xenobiotic metabolic process	2
vitamin transport	2
uronic acid metabolic process	2
tube morphogenesis	2
striated muscle tissue development	2
steroid metabolic process	2
smooth muscle contraction	2
skeletal muscle organ development	2
signal release	2
sensory organ morphogenesis	2
response to xenobiotic stimulus	2
response to nutrient	2
response to metal ion	2
respiratory system development	2
renal filtration cell differentiation	2
regulation of tube diameter	2
regulation of transmembrane transport	2
regulation of transcription involved in G1/S transition of mitotic cell cycle	2
regulation of systemic arterial blood pressure mediated by a chemical signal	2
regulation of systemic arterial blood pressure	2
regulation of neurotransmitter levels	2
regulation of metal ion transport	2
regulation of lipoprotein lipase activity	2
regulation of ion transmembrane transport	2
regulation of cytosolic calcium ion concentration	2
regulation of cAMP metabolic process	2
regulation of blood vessel diameter	2
potassium ion homeostasis	2
positive regulation of transmembrane transport	2
positive regulation of ion transport	2
peptide hormone secretion	2
organic acid transport	2
organic acid transmembrane transport	2
neurotransmitter metabolic process	2
neuropeptide signaling pathway	2
neuron projection guidance	2
negative regulation of peptidase activity	2
negative regulation of lipid transport	2
negative regulation of hydrolase activity	2
negative regulation of hemostasis	2
negative regulation of endopeptidase activity	2
multi-organism behavior	2
monovalent inorganic cation homeostasis	2
monocarboxylic acid transport	2
modulation of chemical synaptic transmission	2
microtubule cytoskeleton organization involved in mitosis	2
lipid transport	2
lipid localization	2
intestinal lipid absorption	2
intestinal cholesterol absorption	2
hormone transport	2
hormone secretion	2
hormone metabolic process	2
glucuronate metabolic process	2
glomerular visceral epithelial cell differentiation	2
glomerular epithelial cell differentiation	2
G-protein coupled receptor signaling pathway, coupled to cyclic nucleotide second messenger	2
flavonoid metabolic process	2
fatty acid derivative metabolic process	2
fat-soluble vitamin metabolic process	2
excretion	2
epithelial tube morphogenesis	2
epithelial cell differentiation involved in kidney development	2
endocrine process	2
diterpenoid metabolic process	2
cyclic-nucleotide-mediated signaling	2
cellular response to xenobiotic stimulus	2
cellular response to hexose stimulus	2
cellular glucuronidation	2
cell-cell adhesion via plasma-membrane adhesion molecules	2
cardiac ventricle morphogenesis	2
carboxylic acid transport	2
carboxylic acid transmembrane transport	2
cAMP metabolic process	2
calcium ion transmembrane import into cytosol	2
C-terminal protein amino acid modification	2
BMP signaling pathway	2
axon guidance	2
adenylate cyclase-modulating G-protein coupled receptor signaling pathway	2
