# Supplementary material for: Co-expression based cancer staging and application
Source: Sci Rep. 2020 Jun 30;10:10624. doi: 10.1038/s41598-020-67476-7 (PMC7327081; doi:10.1038/s41598-020-67476-7)
Supplement: Supplementary file 2 — Supplementary file2 [file 41598_2020_67476_MOESM2_ESM.docx]

Co-Expression based Cancer Staging and Application

Xiangchun Yu2,3,5, Sha Cao4, Yi Zhou3, Zhezhou Yu2*, and Ying Xu1, 3*

1Cancer Systems Biology Center, The China-Japan Union Hospital, and 2College of Computer Science and Technology, Jilin University, Changchun, China; 3Computational Systems Biology Lab, Department of Biochemistry and Molecular Biology and Institute of Bioinformatics, University of Georgia, Georgia, USA; 4Department of Biostatistics, Indiana University School of Medicine, Indianapolis, USA; and 5School of Information Engineering, Jiangxi University of Science and Technology, Ganzhou, China.

Correspondence authors: yuzz@jlu.edu.cn; [xyn@uga.edu](mailto:xyn@uga.edu).

The prediction results by other methods are summarized in Supplementary Tables S1(1-5). We note that most of the machine learning methods give comparable results except for Naive Bayes and random Ferns, whose performance is poorer than the others as detailed in the Tables S1(1-5).

**Table S1(1):** Prediction performance of cancer stages using the Naive Bayes method.

| **Stage** | **Measure** | **BRCA** | **COAD** | **HNSC** | **KIRC** | **KIRP** | **LUAD** | **STAD** | **THCA** |
| --- | --- | --- | --- | --- | --- | --- | --- | --- | --- |
| **1** | **Sensitivity** | 0.1778 | 0.6273 | 0.6143 | 0.7987 | 0.9745 | 0.8386 | 0.2 | 0.8388 |
| **Specificity** | 0.9962 | 0.9908 | 0.8942 | 0.8921 | 0.7 | 0.5909 | 0.9506 | 0.8906 |
| **2** | **Sensitivity** | 0.9317 | 0.8887 | 0.1 | 0.3938 | 0.2333 | 0.3857 | 0.4656 | 0.5933 |
| **Specificity** | 0.2797 | 0.8115 | 0.9757 | 0.959 | 0.9942 | 0.8772 | 0.8257 | 0.9858 |
| **3** | **Sensitivity** | 0.1986 | 0.7132 | 0.1957 | 0.8167 | 0.35 | 0.3292 | 0.6818 | 0.8061 |
| **Specificity** | 0.9535 | 0.8849 | 0.9577 | 0.7832 | 0.9541 | 0.9304 | 0.619 | 0.7853 |
| **4** | **Sensitivity** | 0.58 | 0.5056 | 0.9052 | 0.4417 | 0.675 | 0.1714 | 0.4727 | 0.2688 |
| **Specificity** | 0.9672 | 0.9336 | 0.464 | 0.955 | 0.9169 | 0.95 | 0.8868 | 0.9692 |
| **All** | **Accuracy** | 0.6285 | 0.7412 | 0.6339 | 0.7058 | 0.7827 | 0.6188 | 0.5206 | 0.7456 |
| **Kappa** | 0.229 | 0.6235 | 0.2852 | 0.553 | 0.5166 | 0.3372 | 0.2835 | 0.5831 |

**Table S1(2):** Prediction performance of cancer stages using the treebag method.

| **Stage** | **Measure** | **BRCA** | **COAD** | **HNSC** | **KIRC** | **KIRP** | **LUAD** | **STAD** | **THCA** |
| --- | --- | --- | --- | --- | --- | --- | --- | --- | --- |
| **1** | **Sensitivity** | 0.8074 | 0.9318 | 0.8286 | 0.9291 | 0.9824 | 0.9506 | 0.3267 | 0.9459 |
| **Specificity** | 0.9928 | 0.9927 | 0.8567 | 0.9658 | 0.975 | 0.9818 | 0.9034 | 0.9188 |
| **2** | **Sensitivity** | 0.9656 | 0.9585 | 0.365 | 0.8812 | 0.65 | 0.7457 | 0.6625 | 0.9133 |
| **Specificity** | 0.9594 | 0.9731 | 0.9449 | 0.9525 | 0.9812 | 0.9833 | 0.9471 | 0.9687 |
| **3** | **Sensitivity** | 0.8162 | 0.9158 | 0.4478 | 0.9389 | 0.8857 | 0.7625 | 0.7205 | 0.8121 |
| **Specificity** | 0.9886 | 0.9806 | 0.9202 | 0.9908 | 0.9918 | 0.9784 | 0.8017 | 0.9595 |
| **4** | **Sensitivity** | 0.86 | 0.9667 | 0.8948 | 0.8833 | 0.95 | 0.6571 | 0.7727 | 0.6188 |
| **Specificity** | 0.9331 | 0.9752 | 0.934 | 0.9832 | 0.9662 | 0.8923 | 0.867 | 0.9692 |
| **All** | **Accuracy** | 0.9025 | 0.9427 | 0.7268 | 0.9194 | 0.936 | 0.8584 | 0.65 | 0.8779 |
| **Kappa** | 0.8355 | 0.9191 | 0.5473 | 0.8782 | 0.8717 | 0.777 | 0.5019 | 0.7983 |

**Table S1(3):** Prediction performance of cancer stages using the RF method.

| **Stage** | **Measure** | **BRCA** | **COAD** | **HNSC** | **KIRC** | **KIRP** | **LUAD** | **STAD** | **THCA** |
| --- | --- | --- | --- | --- | --- | --- | --- | --- | --- |
| **1** | **Sensitivity** | 0.6981 | 0.9591 | 0.7857 | 0.9633 | 0.9824 | 0.9614 | 0.1067 | 0.9741 |
| **Specificity** | 0.9992 | 0.9991 | 0.865 | 0.9776 | 0.9208 | 0.9621 | 0.9977 | 0.8953 |
| **2** | **Sensitivity** | 0.9785 | 0.9774 | 0.44 | 0.925 | 0.0667 | 0.7371 | 0.725 | 0.9467 |
| **Specificity** | 0.9451 | 0.9769 | 0.9785 | 0.9576 | 0.9899 | 0.9658 | 0.9271 | 0.9612 |
| **3** | **Sensitivity** | 0.8284 | 0.95 | 0.2913 | 0.9333 | 0.7929 | 0.4542 | 0.8159 | 0.7758 |
| **Specificity** | 0.9849 | 0.9903 | 0.9788 | 0.9941 | 0.9426 | 0.9928 | 0.7328 | 0.9466 |
| **4** | **Sensitivity** | 0.9 | 0.9889 | 0.9675 | 0.8917 | 1 | 0.8 | 0.8273 | 0.3875 |
| **Specificity** | 0.929 | 0.9876 | 0.784 | 0.9939 | 0.9535 | 0.862 | 0.8747 | 0.9842 |
| **All** | **Accuracy** | 0.895 | 0.9679 | 0.752 | 0.9413 | 0.8747 | 0.8195 | 0.6843 | 0.8644 |
| **Kappa** | 0.8202 | 0.9545 | 0.5486 | 0.9109 | 0.7415 | 0.7114 | 0.5299 | 0.7709 |

**Table S1(4):** Prediction performance of cancer stages using the RFerns method.

| **Stage** | **Measure** | **BRCA** | **COAD** | **HNSC** | **KIRC** | **KIRP** | **LUAD** | **STAD** | **THCA** |
| --- | --- | --- | --- | --- | --- | --- | --- | --- | --- |
| **1** | **Sensitivity** | 0.7315 | 0.7409 | 0.3857 | 0.8114 | 0.049 | 0.2964 | 0.7133 | 0.8024 |
| **Specificity** | 0.4287 | 0.9394 | 0.9908 | 0.9513 | 1 | 0.9318 | 0.5759 | 0.9078 |
| **2** | **Sensitivity** | 0.1446 | 0.7981 | 0.64 | 0.5812 | 0.9333 | 0.3686 | 0.5594 | 0.5467 |
| **Specificity** | 0.9609 | 0.9128 | 0.7243 | 0.9993 | 0.0913 | 0.8912 | 0.9229 | 0.9993 |
| **3** | **Sensitivity** | 0.4135 | 0.7868 | 0.6696 | 0.8361 | 0.0857 | 0.875 | 0.4727 | 0.6273 |
| **Specificity** | 0.7576 | 0.8806 | 0.5798 | 0.9361 | 0.9508 | 0.4152 | 0.9 | 0.8922 |
| **4** | **Sensitivity** | 0.32 | 0.6667 | 0.2675 | 0.9042 | 0 | 0.0143 | 0.2636 | 0.7062 |
| **Specificity** | 0.986 | 0.9469 | 0.976 | 0.8595 | 1 | 0.9972 | 0.9824 | 0.8338 |
| **All** | **Accuracy** | 0.3091 | 0.7672 | 0.4055 | 0.8077 | 0.124 | 0.3933 | 0.5127 | 0.7275 |
| **Kappa** | 0.1114 | 0.6728 | 0.2353 | 0.7154 | 0.0273 | 0.1967 | 0.3459 | 0.5737 |

**Table S1(5):** Prediction performance of cancer stages using the WSRF method.

| **Stage** | **Measure** | **BRCA** | **COAD** | **HNSC** | **KIRC** | **KIRP** | **LUAD** | **STAD** | **THCA** |
| --- | --- | --- | --- | --- | --- | --- | --- | --- | --- |
| **1** | **Sensitivity** | 0.463 | 0.9409 | 0.9 | 0.9468 | 0.9784 | 0.9602 | 0.1933 | 0.9741 |
| **Specificity** | 0.9811 | 0.9908 | 0.8633 | 0.9632 | 0.8542 | 0.8318 | 0.9759 | 0.8562 |
| **2** | **Sensitivity** | 0.9737 | 0.9585 | 0.435 | 0.8938 | 0.0833 | 0.6829 | 0.6969 | 0.96 |
| **Specificity** | 0.8263 | 0.9654 | 0.9636 | 0.9655 | 1 | 0.9649 | 0.9229 | 0.9799 |
| **3** | **Sensitivity** | 0.7797 | 0.9316 | 0.3696 | 0.9611 | 0.6786 | 0.4167 | 0.825 | 0.8061 |
| **Specificity** | 0.9796 | 0.9785 | 0.9808 | 0.9882 | 0.9656 | 0.9888 | 0.7069 | 0.9422 |
| **4** | **Sensitivity** | 0.92 | 0.9778 | 0.9701 | 0.8875 | 0.925 | 0.6286 | 0.6818 | 0.3062 |
| **Specificity** | 0.9443 | 0.9929 | 0.87 | 0.9924 | 0.9183 | 0.8979 | 0.9066 | 0.9872 |
| **All** | **Accuracy** | 0.8414 | 0.9504 | 0.7732 | 0.9355 | 0.848 | 0.7919 | 0.6765 | 0.8638 |
| **Kappa** | 0.7147 | 0.9295 | 0.6011 | 0.9018 | 0.6814 | 0.6417 | 0.5142 | 0.7657 |
