# Supplementary material for: Co-expression based cancer staging and application
Source: Sci Rep. 2020 Jun 30;10:10624. doi: 10.1038/s41598-020-67476-7 (PMC7327081; doi:10.1038/s41598-020-67476-7)
Supplement: Supplementary file 5 — Supplementary file5 [file 41598_2020_67476_MOESM5_ESM.xlsx]

## Sheet: BRCA_Stage
Control
ID	Stages(Control)
GO:0006936	i
GO:0003012	i
GO:0030049	i
GO:0033275	i
GO:0006941	i
GO:0006323	i
GO:0070252	i
GO:0030239	i
GO:0030048	i
GO:0003009	i
GO:0055001	i
GO:0071103	i
GO:0055002	i
GO:0050879	i
GO:0050881	i
GO:0007517	i
GO:0010927	i
GO:0006937	i
GO:0000819	i
GO:0060047	i
GO:0003015	i
GO:0060048	i
GO:0051146	i
GO:0014706	i
GO:0060537	i
GO:0045214	i
GO:0090257	i
GO:0000070	i
GO:0007059	i
GO:0098813	i
GO:0048747	i
GO:0060538	i
GO:0031032	i
GO:0042692	i
GO:0140014	i
GO:1903522	i
GO:0060415	i
GO:0051983	i
GO:0055008	i
GO:0006641	i
GO:0006942	i
GO:0048644	i
GO:0007519	i
GO:0007062	i
GO:0008016	i
GO:0010965	i
GO:0048738	i
GO:0051306	i
GO:0006639	i
GO:0006638	i
GO:1905818	i
GO:0033045	i
GO:0043501	i
GO:0019915	i
GO:0000280	i
GO:0051235	i
GO:0071459	i
GO:0033047	i
GO:0015850	i
GO:0030071	i
GO:1902099	i
GO:0014888	i
GO:0007091	i
GO:0033046	i
GO:0007088	i
GO:0051304	i
GO:0051783	i
GO:0044784	i
GO:0055010	i
GO:0034501	i
GO:0051985	i
GO:0008217	i
GO:0014902	i
GO:0010883	i
GO:2000816	i
GO:0050994	i
GO:0048285	i
GO:1902850	i
GO:1905819	i
GO:0055013	i
GO:0003229	i
GO:0033048	i
GO:0034502	i
GO:0003231	i
GO:0010817	i
GO:0055006	i
GO:0048741	i
GO:0045132	i
GO:0016042	i
GO:0035914	i
GO:0019216	i
GO:0007052	i
GO:0045661	i
GO:0055003	i
GO:0034765	i
GO:0034762	i
GO:0065004	i
GO:0071824	i
GO:0003018	i
GO:0003208	i
GO:0014819	i
GO:0014874	i
GO:0042493	i
GO:0050873	i
GO:0006334	i
GO:0034728	i
GO:0010884	i
GO:1900542	i
GO:0006140	i
GO:0031497	i
GO:0006333	i
GO:0045981	i
GO:1900544	i
GO:0002026	i
GO:0055074	i
GO:0006342	i
GO:0045814	i
GO:0001523	i
GO:0016101	i
GO:0006721	i
GO:0019935	i
GO:0051048	i
GO:0006874	i
GO:0050995	i
GO:0019932	i
GO:0072507	i
GO:0034308	i
GO:2000021	i
GO:0014877	i
GO:0014894	i
GO:0014870	i
GO:0072503	i
GO:0042391	i
GO:0035637	i
GO:0009187	i
GO:0051047	i
GO:0032200	i
GO:0010038	i
GO:1903779	i
GO:0071688	i
GO:0031034	i
GO:0031033	i
GO:0035296	i
GO:0097746	i
GO:0051262	i
GO:0006335	i
GO:0034723	i
GO:0000183	i
GO:0051290	i
GO:0045652	i
GO:0045815	i
GO:1902036	i
GO:0060218	i
GO:1901532	i
GO:0050880	i
GO:0035150	i
GO:0019433	i
GO:0038111	i
GO:0098760	i
GO:0098761	i
GO:0046503	i
GO:0051291	i
GO:0002027	i
GO:0051899	i
GO:0019933	i
GO:0030219	i
GO:2000736	i
GO:0051592	i
GO:0046461	i
GO:0046464	i
GO:0060968	i
GO:0060964	i
GO:1903532	i
GO:0070296	i
GO:0060147	i
GO:0060966	i
GO:0007512	i
GO:0050982	i
GO:0019229	i
GO:0046058	i
GO:0030799	i
GO:0046887	i
GO:0030801	i
GO:0015671	i
GO:0002244	i
GO:0045907	i
GO:0051281	i
GO:0006336	i
GO:0034724	i
GO:0042310	i
GO:0030099	i
GO:0030299	i
GO:0098856	i
GO:0042744	i
GO:0045637	i
GO:0060402	i
GO:0006939	i
GO:0097756	i
GO:1903524	i
GO:0051279	i
GO:0007204	i
GO:0002227	i
GO:0042572	i
GO:0019731	i
GO:0010524	i
GO:0071804	i
GO:0071805	i
GO:0034508	i
GO:0015844	i
GO:0046660	i
GO:0007586	i
GO:0044241	i
GO:0010522	i
GO:0030814	i
GO:0048863	i
GO:0022600	i
GO:0002385	i
GO:0002251	i
GO:0050892	i
GO:0030816	i
GO:0002021	i
GO:0006940	i
GO:0015837	i
GO:0006936	ii
GO:0003012	ii
GO:0030049	ii
GO:0033275	ii
GO:0006941	ii
GO:0006323	ii
GO:0030239	ii
GO:0006334	ii
GO:0070252	ii
GO:0000819	ii
GO:0071103	ii
GO:0007517	ii
GO:0055002	ii
GO:0034728	ii
GO:0007059	ii
GO:0055001	ii
GO:0098813	ii
GO:0000070	ii
GO:0030048	ii
GO:0060538	ii
GO:0140014	ii
GO:0051146	ii
GO:0014706	ii
GO:0010927	ii
GO:0003009	ii
GO:0000280	ii
GO:0007519	ii
GO:0060537	ii
GO:0065004	ii
GO:0045214	ii
GO:0050879	ii
GO:0050881	ii
GO:0060047	ii
GO:0060048	ii
GO:0003015	ii
GO:0048285	ii
GO:0071824	ii
GO:0006937	ii
GO:0051983	ii
GO:0048747	ii
GO:0042692	ii
GO:0010817	ii
GO:1903522	ii
GO:0010965	ii
GO:0034765	ii
GO:0031032	ii
GO:0007062	ii
GO:0090257	ii
GO:0051306	ii
GO:0015850	ii
GO:0006641	ii
GO:1905818	ii
GO:0034762	ii
GO:0007088	ii
GO:0051235	ii
GO:0051321	ii
GO:0030071	ii
GO:0008016	ii
GO:0033045	ii
GO:1902099	ii
GO:0045981	ii
GO:1900544	ii
GO:0007091	ii
GO:0014902	ii
GO:0033047	ii
GO:0051783	ii
GO:0044784	ii
GO:0051304	ii
GO:0035914	ii
GO:0006942	ii
GO:0140013	ii
GO:0006639	ii
GO:0033046	ii
GO:0006638	ii
GO:2000816	ii
GO:0051985	ii
GO:1903046	ii
GO:0045132	ii
GO:1905819	ii
GO:0051303	ii
GO:0051310	ii
GO:0050000	ii
GO:0043501	ii
GO:0060415	ii
GO:0019915	ii
GO:0008608	ii
GO:0033048	ii
GO:0055008	ii
GO:0071459	ii
GO:0051784	ii
GO:1902850	ii
GO:0014904	ii
GO:0031577	ii
GO:0048644	ii
GO:0019216	ii
GO:0014888	ii
GO:0034501	ii
GO:0007080	ii
GO:0010883	ii
GO:0007052	ii
GO:0055013	ii
GO:0007094	ii
GO:0071173	ii
GO:0071174	ii
GO:0045841	ii
GO:0048741	ii
GO:0007127	ii
GO:0008217	ii
GO:0031667	ii
GO:0009743	ii
GO:1904062	ii
GO:1902100	ii
GO:0034502	ii
GO:0006816	ii
GO:1900542	ii
GO:0007093	ii
GO:0045839	ii
GO:0055006	ii
GO:0014074	ii
GO:0070838	ii
GO:0006140	ii
GO:0072511	ii
GO:0030261	ii
GO:0000083	ii
GO:0031099	ii
GO:0045834	ii
GO:0048738	ii
GO:0000075	ii
GO:0001101	ii
GO:0010959	ii
GO:0010876	ii
GO:1901652	ii
GO:0007051	ii
GO:0032409	ii
GO:0042246	ii
GO:0090068	ii
GO:0016042	ii
GO:0055010	ii
GO:0006270	ii
GO:0009991	ii
GO:0032844	ii
GO:0050994	ii
GO:0002026	ii
GO:0034284	ii
GO:0031497	ii
GO:0006333	ii
GO:0003208	ii
GO:0034308	ii
GO:0010830	ii
GO:0070296	ii
GO:0003018	ii
GO:0055074	ii
GO:0050708	ii
GO:0014819	ii
GO:0055003	ii
GO:0014874	ii
GO:0006874	ii
GO:0050873	ii
GO:0002791	ii
GO:0061337	ii
GO:0010884	ii
GO:0072507	ii
GO:0034508	ii
GO:0033500	ii
GO:0042593	ii
GO:2000021	ii
GO:0032200	ii
GO:0072503	ii
GO:0006336	ii
GO:0034724	ii
GO:0042493	ii
GO:0009746	ii
GO:0097305	ii
GO:0001523	ii
GO:0035637	ii
GO:0006342	ii
GO:0045814	ii
GO:1903779	ii
GO:0016101	ii
GO:0006721	ii
GO:0007520	ii
GO:0000768	ii
GO:0006949	ii
GO:0006720	ii
GO:0046879	ii
GO:1903580	ii
GO:0007076	ii
GO:0009914	ii
GO:0051209	ii
GO:0051283	ii
GO:0051282	ii
GO:0051208	ii
GO:0050995	ii
GO:0045471	ii
GO:0043270	ii
GO:0097553	ii
GO:0060402	ii
GO:0060401	ii
GO:0035994	ii
GO:0042693	ii
GO:0051279	ii
GO:0006805	ii
GO:0035296	ii
GO:0097746	ii
GO:0019932	ii
GO:0009187	ii
GO:0045143	ii
GO:0071466	ii
GO:0009749	ii
GO:0042391	ii
GO:0051048	ii
GO:1903531	ii
GO:1904064	ii
GO:0002027	ii
GO:0009410	ii
GO:0006335	ii
GO:0034723	ii
GO:0000183	ii
GO:0051290	ii
GO:0045652	ii
GO:1902036	ii
GO:1901532	ii
GO:0050880	ii
GO:0035150	ii
GO:0034080	ii
GO:0061641	ii
GO:0031055	ii
GO:0043486	ii
GO:0043044	ii
GO:0051262	ii
GO:0034767	ii
GO:0071688	ii
GO:0031034	ii
GO:0031033	ii
GO:0055090	ii
GO:0070328	ii
GO:0038111	ii
GO:0098760	ii
GO:0098761	ii
GO:0030802	ii
GO:0030219	ii
GO:0010522	ii
GO:0046883	ii
GO:0032845	ii
GO:0021700	ii
GO:0060761	ii
GO:0052652	ii
GO:0019229	ii
GO:0007204	ii
GO:0045815	ii
GO:0060964	ii
GO:0030801	ii
GO:0060218	ii
GO:0019935	ii
GO:0006069	ii
GO:0042445	ii
GO:0032526	ii
GO:0006939	ii
GO:0046058	ii
GO:0001508	ii
GO:0030799	ii
GO:0060147	ii
GO:0060966	ii
GO:2000736	ii
GO:0023061	ii
GO:0019433	ii
GO:0050982	ii
GO:0014808	ii
GO:0051291	ii
GO:0006813	ii
GO:1901739	ii
GO:0051480	ii
GO:0060968	ii
GO:0051592	ii
GO:0046503	ii
GO:0042310	ii
GO:0046461	ii
GO:0046464	ii
GO:0010038	ii
GO:0051899	ii
GO:0051047	ii
GO:1903524	ii
GO:0033762	ii
GO:0007512	ii
GO:0015671	ii
GO:0002244	ii
GO:0090276	ii
GO:0097756	ii
GO:0071804	ii
GO:0071805	ii
GO:0071300	ii
GO:0060986	ii
GO:0050886	ii
GO:0030299	ii
GO:0098856	ii
GO:0034114	ii
GO:0030816	ii
GO:0051384	ii
GO:0030814	ii
GO:0045907	ii
GO:0051281	ii
GO:0019933	ii
GO:0031960	ii
GO:0002227	ii
GO:2000352	ii
GO:1903532	ii
GO:0030072	ii
GO:0019731	ii
GO:0010524	ii
GO:0044241	ii
GO:0010737	ii
GO:0061041	ii
GO:1904036	ii
GO:0046887	ii
GO:0002576	ii
GO:0006940	ii
GO:1903034	ii
GO:0002793	ii
GO:0042730	ii
GO:0002385	ii
GO:0050892	ii
GO:0052547	ii
GO:0048863	ii
GO:0006936	iii
GO:0003012	iii
GO:0030049	iii
GO:0033275	iii
GO:0030239	iii
GO:0006941	iii
GO:0007517	iii
GO:0055002	iii
GO:0055001	iii
GO:0045214	iii
GO:0010927	iii
GO:0070252	iii
GO:0014706	iii
GO:0051146	iii
GO:0000819	iii
GO:0060537	iii
GO:0030048	iii
GO:0031032	iii
GO:0000070	iii
GO:0098813	iii
GO:0007059	iii
GO:0003009	iii
GO:0060538	iii
GO:0140014	iii
GO:0050879	iii
GO:0050881	iii
GO:0042692	iii
GO:0006937	iii
GO:0006323	iii
GO:0007519	iii
GO:0000280	iii
GO:0060415	iii
GO:0060048	iii
GO:0055008	iii
GO:0060047	iii
GO:0003015	iii
GO:0048644	iii
GO:0090257	iii
GO:0071103	iii
GO:0048285	iii
GO:0051235	iii
GO:0051983	iii
GO:0048747	iii
GO:0006942	iii
GO:0048738	iii
GO:0007062	iii
GO:1903522	iii
GO:0035914	iii
GO:0055013	iii
GO:0010965	iii
GO:0015850	iii
GO:0008016	iii
GO:0051306	iii
GO:0030071	iii
GO:1902099	iii
GO:0055006	iii
GO:1905818	iii
GO:0007091	iii
GO:0001101	iii
GO:1902850	iii
GO:0019915	iii
GO:0033045	iii
GO:0044784	iii
GO:0006641	iii
GO:0014902	iii
GO:0051304	iii
GO:0007052	iii
GO:0051321	iii
GO:0033047	iii
GO:0008608	iii
GO:0043501	iii
GO:0051310	iii
GO:0019216	iii
GO:0007088	iii
GO:0071459	iii
GO:0010883	iii
GO:0051783	iii
GO:0051303	iii
GO:0140013	iii
GO:0030261	iii
GO:0050000	iii
GO:0006639	iii
GO:0006638	iii
GO:0045132	iii
GO:0007051	iii
GO:0034501	iii
GO:0014888	iii
GO:0033046	iii
GO:0000075	iii
GO:1903046	iii
GO:0051985	iii
GO:0031577	iii
GO:2000816	iii
GO:0007080	iii
GO:0055007	iii
GO:0000910	iii
GO:0003007	iii
GO:1905819	iii
GO:0007093	iii
GO:0090068	iii
GO:0033048	iii
GO:0043434	iii
GO:0007094	iii
GO:0071173	iii
GO:0071174	iii
GO:0007127	iii
GO:0003205	iii
GO:0000281	iii
GO:1901652	iii
GO:0045841	iii
GO:0048741	iii
GO:0065004	iii
GO:0071824	iii
GO:0070542	iii
GO:0032409	iii
GO:0010959	iii
GO:0045444	iii
GO:0034284	iii
GO:0002026	iii
GO:0014074	iii
GO:0045981	iii
GO:1900544	iii
GO:0050994	iii
GO:1904062	iii
GO:0045661	iii
GO:1900542	iii
GO:0006140	iii
GO:0031667	iii
GO:0010817	iii
GO:0003231	iii
GO:0006342	iii
GO:0045814	iii
GO:0055010	iii
GO:0003229	iii
GO:0009991	iii
GO:0003206	iii
GO:0014874	iii
GO:0006816	iii
GO:0014819	iii
GO:0001523	iii
GO:0016101	iii
GO:0006721	iii
GO:0032412	iii
GO:0022898	iii
GO:0032844	iii
GO:1903169	iii
GO:0002791	iii
GO:0070588	iii
GO:0055003	iii
GO:0035994	iii
GO:0010884	iii
GO:0071229	iii
GO:0061337	iii
GO:0070838	iii
GO:0072511	iii
GO:0006805	iii
GO:0055074	iii
GO:0050873	iii
GO:0003208	iii
GO:0071466	iii
GO:0009410	iii
GO:0006334	iii
GO:0034728	iii
GO:0006874	iii
GO:0034765	iii
GO:0034762	iii
GO:0072507	iii
GO:0071688	iii
GO:0031034	iii
GO:0031033	iii
GO:0031497	iii
GO:0006333	iii
GO:0042493	iii
GO:1903779	iii
GO:0010830	iii
GO:0072503	iii
GO:0007076	iii
GO:0070296	iii
GO:0046879	iii
GO:0009914	iii
GO:0035637	iii
GO:2000021	iii
GO:0014877	iii
GO:0014894	iii
GO:0019932	iii
GO:0000183	iii
GO:0034508	iii
GO:0097305	iii
GO:0051048	iii
GO:0043270	iii
GO:0051209	iii
GO:0051283	iii
GO:0051282	iii
GO:0051208	iii
GO:0006335	iii
GO:0034723	iii
GO:0051290	iii
GO:1904064	iii
GO:0051279	iii
GO:0097553	iii
GO:0006336	iii
GO:0034724	iii
GO:0051291	iii
GO:0046883	iii
GO:0051262	iii
GO:0035265	iii
GO:0007520	iii
GO:0071398	iii
GO:0046503	iii
GO:0009612	iii
GO:0060402	iii
GO:0060401	iii
GO:0032845	iii
GO:0019433	iii
GO:1903580	iii
GO:0046461	iii
GO:0046464	iii
GO:0030799	iii
GO:0000768	iii
GO:0006949	iii
GO:0001508	iii
GO:0010522	iii
GO:0014808	iii
GO:1903514	iii
GO:2001257	iii
GO:0032526	iii
GO:0023061	iii
GO:0007512	iii
GO:0030299	iii
GO:0098856	iii
GO:0007204	iii
GO:0010038	iii
GO:0051592	iii
GO:0051480	iii
GO:0051899	iii
GO:0030814	iii
GO:0050982	iii
GO:0071300	iii
GO:0021700	iii
GO:0051281	iii
GO:0044241	iii
GO:0010880	iii
GO:1900543	iii
GO:0045980	iii
GO:0006939	iii
GO:0034080	iii
GO:0061641	iii
GO:0031055	iii
GO:0007586	iii
GO:0022600	iii
GO:0050886	iii
GO:0006936	iv
GO:0003012	iv
GO:0030049	iv
GO:0033275	iv
GO:0007517	iv
GO:0030239	iv
GO:0006941	iv
GO:0014706	iv
GO:0000819	iv
GO:0070252	iv
GO:0060537	iv
GO:0051146	iv
GO:0000070	iv
GO:0055001	iv
GO:0006937	iv
GO:0055002	iv
GO:0090257	iv
GO:0098813	iv
GO:0030048	iv
GO:0007059	iv
GO:0140014	iv
GO:0060047	iv
GO:0010927	iv
GO:0003015	iv
GO:0060538	iv
GO:0042692	iv
GO:0003009	iv
GO:1903522	iv
GO:0051983	iv
GO:0007519	iv
GO:0000280	iv
GO:0050879	iv
GO:0050881	iv
GO:0060048	iv
GO:0048738	iv
GO:0010965	iv
GO:0045214	iv
GO:0051235	iv
GO:0006942	iv
GO:0051306	iv
GO:0007091	iv
GO:0008016	iv
GO:0044784	iv
GO:1905818	iv
GO:0048285	iv
GO:0030071	iv
GO:0033045	iv
GO:1902099	iv
GO:0033047	iv
GO:0051304	iv
GO:0055008	iv
GO:0031032	iv
GO:0033046	iv
GO:0031577	iv
GO:2000816	iv
GO:0051985	iv
GO:0001101	iv
GO:1905819	iv
GO:0007088	iv
GO:0007094	iv
GO:0071173	iv
GO:0071174	iv
GO:0060415	iv
GO:0045841	iv
GO:0033048	iv
GO:0006323	iv
GO:0051783	iv
GO:1902100	iv
GO:0071103	iv
GO:0048644	iv
GO:0007062	iv
GO:0045839	iv
GO:0055006	iv
GO:0015850	iv
GO:0055013	iv
GO:1902850	iv
GO:0051784	iv
GO:0048747	iv
GO:0071459	iv
GO:0019216	iv
GO:0007093	iv
GO:0006641	iv
GO:0034501	iv
GO:0000075	iv
GO:0008608	iv
GO:0007052	iv
GO:0051321	iv
GO:1901652	iv
GO:0051310	iv
GO:0019915	iv
GO:0043434	iv
GO:0003007	iv
GO:0010876	iv
GO:0010883	iv
GO:0030261	iv
GO:0090068	iv
GO:0045787	iv
GO:0006639	iv
GO:0043500	iv
GO:0006638	iv
GO:0007051	iv
GO:0000910	iv
GO:0014888	iv
GO:0000226	iv
GO:0043501	iv
GO:0043502	iv
GO:1901989	iv
GO:0051303	iv
GO:0045834	iv
GO:0050000	iv
GO:0007080	iv
GO:0015718	iv
GO:1901653	iv
GO:1901990	iv
GO:0045132	iv
GO:1901992	iv
GO:0015849	iv
GO:0140013	iv
GO:1901987	iv
GO:0046942	iv
GO:0015909	iv
GO:0006869	iv
GO:1901615	iv
GO:0034502	iv
GO:0046890	iv
GO:0071375	iv
GO:0006342	iv
GO:0045444	iv
GO:0051302	iv
GO:0019432	iv
GO:0046460	iv
GO:0046463	iv
GO:0001523	iv
GO:0045981	iv
GO:1900544	iv
GO:0006334	iv
GO:0048638	iv
GO:0003300	iv
GO:0034728	iv
GO:0055007	iv
GO:0016101	iv
GO:0006721	iv
GO:0070542	iv
GO:0014897	iv
GO:0014896	iv
GO:0031667	iv
GO:0008217	iv
GO:0035051	iv
GO:0014819	iv
GO:0055003	iv
GO:0006720	iv
GO:0031497	iv
GO:0051653	iv
GO:0006333	iv
GO:0034308	iv
GO:1901342	iv
GO:0032409	iv
GO:1900542	iv
GO:0006140	iv
GO:0071229	iv
GO:0009991	iv
GO:0046683	iv
GO:0014074	iv
GO:0035994	iv
GO:0010884	iv
GO:0046320	iv
GO:0010817	iv
GO:0006805	iv
GO:0014902	iv
GO:0001525	iv
GO:0010959	iv
GO:1902969	iv
GO:1903169	iv
GO:0045765	iv
GO:0003205	iv
GO:1901019	iv
GO:1903779	iv
GO:0050873	iv
GO:0033762	iv
GO:0071466	iv
GO:0000183	iv
GO:0032412	iv
GO:0022898	iv
GO:0042493	iv
GO:0031099	iv
GO:0043270	iv
GO:0009410	iv
GO:0002026	iv
GO:0055010	iv
GO:0003229	iv
GO:0007076	iv
GO:0051782	iv
GO:0006335	iv
GO:0034723	iv
GO:0051924	iv
GO:0003206	iv
GO:0003231	iv
GO:0097305	iv
GO:0051591	iv
GO:0051051	iv
GO:0016202	iv
GO:1901861	iv
GO:0009187	iv
GO:0046879	iv
GO:0061337	iv
GO:1904062	iv
GO:0045927	iv
GO:0051290	iv
GO:0045471	iv
GO:0048634	iv
GO:0035914	iv
GO:0014874	iv
GO:0045821	iv
GO:1903580	iv
GO:0090066	iv
GO:0019935	iv
GO:0051926	iv
GO:0023061	iv
GO:1904064	iv
GO:0034767	iv
GO:0034764	iv
GO:0048639	iv
GO:0006816	iv
GO:0045923	iv
GO:0019433	iv
GO:0030801	iv
GO:0070588	iv
GO:0070296	iv
GO:0006336	iv
GO:0034724	iv
GO:0003208	iv
GO:0051194	iv
GO:0051197	iv
GO:0051262	iv
GO:0043271	iv
GO:0032526	iv
GO:0051279	iv
GO:0034765	iv
GO:0034762	iv
GO:0046888	iv
GO:0046883	iv
GO:0055117	iv
GO:0030802	iv
GO:1900371	iv
GO:0030808	iv
GO:0052652	iv
GO:0009190	iv
GO:0035265	iv
GO:0034508	iv
GO:0071300	iv
GO:0034754	iv
GO:1903115	iv
GO:0070838	iv
GO:0072511	iv
GO:0046058	iv
GO:0042445	iv
GO:0051209	iv
GO:0051283	iv
GO:0051282	iv
GO:0051208	iv
GO:0030799	iv
GO:0035637	iv
GO:0051048	iv
GO:0006069	iv
GO:0006067	iv
GO:0043949	iv
GO:0032844	iv
GO:0060314	iv
GO:0055074	iv
GO:0019932	iv
GO:2000021	iv
GO:0050982	iv
GO:2001257	iv
GO:0003018	iv
GO:0009612	iv
GO:0051384	iv
GO:0070482	iv
GO:0010522	iv
GO:0090075	iv
GO:0035404	iv
GO:0090266	iv
GO:1903504	iv
GO:0050746	iv
GO:0090231	iv
GO:0014808	iv
GO:1903514	iv
GO:0051281	iv
GO:0002027	iv
GO:0019933	iv
GO:0030816	iv
GO:0097553	iv
GO:0006874	iv
GO:0071320	iv
GO:0031960	iv
GO:0048469	iv
GO:0050848	iv
GO:0048709	iv
GO:0051592	iv
GO:0021700	iv
GO:0007178	iv
GO:0042572	iv
GO:0060402	iv
GO:0060401	iv
GO:0050808	iv
GO:0001558	iv
GO:0014877	iv
GO:0014894	iv
GO:0014870	iv
GO:0032845	iv
GO:0032103	iv
GO:0034080	iv
GO:0061641	iv
GO:0031055	iv
GO:0060421	iv
GO:0010524	iv
GO:0072507	iv
GO:0007586	iv
GO:0060191	iv
GO:0072503	iv
GO:0071688	iv
GO:0031034	iv
GO:0031033	iv
GO:0097009	iv
GO:0001508	iv
GO:0016049	iv
GO:0051047	iv

## Sheet: COAD_Stage
ID	Stages
GO:0006936	i
GO:0015850	i
GO:0015711	i
GO:0003012	i
GO:0006814	i
GO:0010817	i
GO:0006874	i
GO:0035725	i
GO:0006939	i
GO:0055074	i
GO:0007626	i
GO:0072503	i
GO:0006959	i
GO:0072507	i
GO:0006937	i
GO:0051480	i
GO:0042391	i
GO:1903522	i
GO:0006898	i
GO:0051952	i
GO:0050900	i
GO:0055067	i
GO:0008016	i
GO:0043270	i
GO:0015837	i
GO:0010959	i
GO:0007611	i
GO:0019932	i
GO:0060047	i
GO:0006721	i
GO:0060402	i
GO:0007204	i
GO:0003015	i
GO:0090257	i
GO:0051279	i
GO:0072376	i
GO:0034765	i
GO:0030534	i
GO:0035637	i
GO:0034762	i
GO:0016042	i
GO:0003018	i
GO:0010522	i
GO:0008202	i
GO:1904062	i
GO:0060078	i
GO:0023061	i
GO:0009914	i
GO:0097553	i
GO:0060401	i
GO:0050890	i
GO:0072511	i
GO:1903779	i
GO:0061564	i
GO:2000021	i
GO:0051209	i
GO:0051283	i
GO:0043271	i
GO:0006816	i
GO:0050804	i
GO:0046883	i
GO:0051282	i
GO:0061337	i
GO:0006836	i
GO:0007517	i
GO:0006958	i
GO:0002455	i
GO:0051208	i
GO:0006956	i
GO:1903317	i
GO:0070838	i
GO:0015696	i
GO:0006720	i
GO:0034764	i
GO:0046879	i
GO:1902305	i
GO:0051924	i
GO:0034767	i
GO:0050808	i
GO:0099565	i
GO:0071804	i
GO:0071805	i
GO:0002920	i
GO:0070613	i
GO:0032409	i
GO:0008344	i
GO:0006869	i
GO:0002526	i
GO:0010876	i
GO:0035239	i
GO:0008217	i
GO:0015701	i
GO:0046942	i
GO:0042493	i
GO:0035296	i
GO:0097746	i
GO:0007613	i
GO:0015844	i
GO:0015849	i
GO:0050880	i
GO:0035150	i
GO:0006940	i
GO:0006730	i
GO:0006641	i
GO:0006639	i
GO:0006638	i
GO:0006865	i
GO:0030004	i
GO:0007188	i
GO:0019433	i
GO:0051932	i
GO:1905952	i
GO:0046461	i
GO:0046464	i
GO:0055078	i
GO:0007586	i
GO:0007218	i
GO:0051954	i
GO:0001523	i
GO:0016101	i
GO:0046503	i
GO:0034378	i
GO:0045104	i
GO:0045103	i
GO:0071772	i
GO:0071773	i
GO:0007187	i
GO:0034367	i
GO:0034368	i
GO:0034369	i
GO:0050433	i
GO:0009991	i
GO:0034370	i
GO:0050432	i
GO:0007631	i
GO:0033555	i
GO:0007584	i
GO:0098656	i
GO:0007588	i
GO:1905039	i
GO:0032228	i
GO:0050994	i
GO:0019935	i
GO:1903825	i
GO:0097756	i
GO:0031667	i
GO:0045776	i
GO:0003333	i
GO:0019229	i
GO:0030301	i
GO:0060485	i
GO:0002576	i
GO:0090092	i
GO:0048871	i
GO:0033700	i
GO:0060536	i
GO:0042310	i
GO:0006835	i
GO:0007178	i
GO:0042157	i
GO:0030509	i
GO:0050892	i
GO:0042445	i
GO:0001655	i
GO:0002026	i
GO:0090596	i
GO:0048863	i
GO:0021953	i
GO:0015698	i
GO:0090023	i
GO:0015721	i
GO:0090022	i
GO:0051180	i
GO:0003044	i
GO:0003073	i
GO:0015718	i
GO:0052695	i
GO:0001503	i
GO:0006936	ii
GO:0010817	ii
GO:0003012	ii
GO:0006959	ii
GO:0015850	ii
GO:0007611	ii
GO:0015711	ii
GO:0050890	ii
GO:0046883	ii
GO:0061564	ii
GO:0006937	ii
GO:0007626	ii
GO:0006874	ii
GO:0008016	ii
GO:0072503	ii
GO:0006814	ii
GO:0072507	ii
GO:0055074	ii
GO:0042391	ii
GO:0007411	ii
GO:1903522	ii
GO:0019932	ii
GO:0097485	ii
GO:0060047	ii
GO:0007409	ii
GO:0003015	ii
GO:0006939	ii
GO:0051480	ii
GO:0035725	ii
GO:0006898	ii
GO:0007612	ii
GO:0023061	ii
GO:0007517	ii
GO:0050900	ii
GO:0060078	ii
GO:0035637	ii
GO:0060402	ii
GO:0090257	ii
GO:0010959	ii
GO:0072511	ii
GO:0070252	ii
GO:0043270	ii
GO:0007204	ii
GO:0060537	ii
GO:0006958	ii
GO:0014706	ii
GO:0002920	ii
GO:0002455	ii
GO:0006956	ii
GO:0033500	ii
GO:0042593	ii
GO:0006816	ii
GO:0060401	ii
GO:0072376	ii
GO:0070838	ii
GO:0050804	ii
GO:0030048	ii
GO:1903779	ii
GO:0051924	ii
GO:0061337	ii
GO:0051279	ii
GO:0060538	ii
GO:0008202	ii
GO:0010522	ii
GO:1904062	ii
GO:0006941	ii
GO:0050808	ii
GO:0046879	ii
GO:0002526	ii
GO:0009914	ii
GO:0050807	ii
GO:0050803	ii
GO:0035239	ii
GO:0097553	ii
GO:0001764	ii
GO:0030072	ii
GO:0060079	ii
GO:0015701	ii
GO:0099565	ii
GO:0006641	ii
GO:0051952	ii
GO:0001678	ii
GO:0019433	ii
GO:0006730	ii
GO:0055067	ii
GO:0008217	ii
GO:0071333	ii
GO:0001654	ii
GO:0042493	ii
GO:0090276	ii
GO:0015837	ii
GO:0071331	ii
GO:0071326	ii
GO:0071322	ii
GO:0051963	ii
GO:0051932	ii
GO:0034378	ii
GO:0007188	ii
GO:0007586	ii
GO:0007218	ii
GO:0060541	ii
GO:0010043	ii
GO:0051705	ii
GO:0007187	ii
GO:0060562	ii
GO:0006940	ii
GO:0007215	ii
GO:0030324	ii
GO:0007584	ii
GO:0046942	ii
GO:0007631	ii
GO:0032228	ii
GO:0015849	ii
GO:0030004	ii
GO:0055078	ii
GO:0030900	ii
GO:0007613	ii
GO:0051180	ii
GO:0051954	ii
GO:0071772	ii
GO:0071773	ii
GO:0042445	ii
GO:0042742	ii
GO:0050433	ii
GO:0050432	ii
GO:0072001	ii
GO:0090092	ii
GO:0098656	ii
GO:0060536	ii
GO:0033555	ii
GO:0003205	ii
GO:0001655	ii
GO:0001822	ii
GO:0043010	ii
GO:0050795	ii
GO:0002026	ii
GO:0042133	ii
GO:0019233	ii
GO:0090023	ii
GO:0090022	ii
GO:0050892	ii
GO:0050886	ii
GO:0034310	ii
GO:0071624	ii
GO:1902624	ii
GO:0015721	ii
GO:1902622	ii
GO:0007588	ii
GO:0042475	ii
GO:0033273	ii
GO:0010817	iii
GO:0015850	iii
GO:0006959	iii
GO:0006936	iii
GO:0015711	iii
GO:0007626	iii
GO:0009914	iii
GO:0046883	iii
GO:0006814	iii
GO:0003012	iii
GO:0046879	iii
GO:0006898	iii
GO:0023061	iii
GO:0006939	iii
GO:0006937	iii
GO:0008202	iii
GO:1903522	iii
GO:0050900	iii
GO:0043270	iii
GO:0008016	iii
GO:0002526	iii
GO:0006874	iii
GO:0007611	iii
GO:0055074	iii
GO:0072503	iii
GO:0061564	iii
GO:0002920	iii
GO:0060047	iii
GO:0072507	iii
GO:0072376	iii
GO:0003015	iii
GO:0010959	iii
GO:0051480	iii
GO:0006958	iii
GO:0007411	iii
GO:0006956	iii
GO:0002455	iii
GO:0097485	iii
GO:0051963	iii
GO:0030072	iii
GO:0050807	iii
GO:0015701	iii
GO:0035725	iii
GO:0006641	iii
GO:0001764	iii
GO:0006730	iii
GO:0007586	iii
GO:0046942	iii
GO:0055067	iii
GO:0015849	iii
GO:0071333	iii
GO:0035239	iii
GO:0045104	iii
GO:0045103	iii
GO:0006940	iii
GO:0051952	iii
GO:0071331	iii
GO:0071326	iii
GO:0071322	iii
GO:0008217	iii
GO:0015837	iii
GO:0009812	iii
GO:0009991	iii
GO:0055078	iii
GO:0007218	iii
GO:0051180	iii
GO:0072001	iii
GO:0015844	iii
GO:0098656	iii
GO:0042445	iii
GO:0001655	iii
GO:0003205	iii
GO:0060536	iii
GO:0001822	iii
GO:0052695	iii
GO:0006063	iii
GO:0019585	iii
GO:0008277	iii
GO:0019233	iii
GO:0060562	iii
GO:0050886	iii
GO:0050433	iii
GO:0050432	iii
GO:0042133	iii
GO:0051954	iii
GO:0071772	iii
GO:0071773	iii
GO:0034310	iii
GO:0051937	iii
GO:0042475	iii
GO:0045745	iii
GO:0015721	iii
GO:0044236	iii
GO:0042742	iii
GO:0021953	iii
GO:0044243	iii
GO:0060986	iii
GO:0060485	iii
GO:0001656	iii
GO:0006835	iii
GO:0015698	iii
GO:0048871	iii
GO:0006958	iv
GO:0006956	iv
GO:0072376	iv
GO:0002455	iv
GO:0006959	iv
GO:0002920	iv
GO:0030449	iv
GO:2000257	iv
GO:0050900	iv
GO:0016064	iv
GO:0002526	iv
GO:0019724	iv
GO:0006898	iv
GO:1903317	iv
GO:0070613	iv
GO:0002673	iv
GO:0006936	iv
GO:0016485	iv
GO:0002433	iv
GO:0038096	iv
GO:0002449	iv
GO:0038094	iv
GO:0002431	iv
GO:0002460	iv
GO:0006909	iv
GO:0051604	iv
GO:0015711	iv
GO:0003012	iv
GO:0006910	iv
GO:0042742	iv
GO:0006939	iv
GO:0002429	iv
GO:0038095	iv
GO:0050853	iv
GO:0002768	iv
GO:0007626	iv
GO:0006937	iv
GO:0002377	iv
GO:0061564	iv
GO:0008037	iv
GO:0007517	iv
GO:0006911	iv
GO:0050727	iv
GO:0008202	iv
GO:0043270	iv
GO:0060537	iv
GO:0099024	iv
GO:0014706	iv
GO:0007409	iv
GO:0055074	iv
GO:0006874	iv
GO:0008016	iv
GO:1903522	iv
GO:0038093	iv
GO:0010324	iv
GO:0072507	iv
GO:0050890	iv
GO:0015850	iv
GO:0002440	iv
GO:0050807	iv
GO:0050803	iv
GO:0006721	iv
GO:0071294	iv
GO:0015701	iv
GO:0007611	iv
GO:0006814	iv
GO:0010817	iv
GO:0046883	iv
GO:0007411	iv
GO:0097485	iv
GO:0001764	iv
GO:0010043	iv
GO:0046879	iv
GO:0019433	iv
GO:0006641	iv
GO:0006639	iv
GO:0006638	iv
GO:0035239	iv
GO:0051705	iv
GO:0009914	iv
GO:0006730	iv
GO:0046461	iv
GO:0046464	iv
GO:0034378	iv
GO:0034370	iv
GO:0006805	iv
GO:0051966	iv
GO:0007188	iv
GO:0071466	iv
GO:0009410	iv
GO:0006940	iv
GO:0001654	iv
GO:0035725	iv
GO:0055067	iv
GO:0007584	iv
GO:0007187	iv
GO:0001523	iv
GO:0009991	iv
GO:0055078	iv
GO:0007586	iv
GO:0008217	iv
GO:0060562	iv
GO:0030900	iv
GO:0030299	iv
GO:0098856	iv
GO:0046942	iv
GO:0045104	iv
GO:0019731	iv
GO:0045103	iv
GO:1904478	iv
GO:0030004	iv
GO:0015849	iv
GO:0031667	iv
GO:0044241	iv
GO:0051952	iv
GO:0033700	iv
GO:0060536	iv
GO:0021954	iv
GO:0050892	iv
GO:0090092	iv
GO:0072001	iv
GO:0045109	iv
GO:0015837	iv
GO:0007218	iv
GO:0071772	iv
GO:0071773	iv
GO:0043010	iv
GO:0050886	iv
GO:0034310	iv
GO:0019233	iv
GO:0042445	iv

## Sheet: HNSC_Stage
ID	Stages
GO:0006936	i
GO:0030049	i
GO:0033275	i
GO:0003012	i
GO:0003341	i
GO:0030239	i
GO:0006941	i
GO:0070252	i
GO:0030048	i
GO:0070268	i
GO:0051146	i
GO:0010927	i
GO:0055001	i
GO:0003009	i
GO:0055002	i
GO:0045214	i
GO:0035082	i
GO:0050879	i
GO:0050881	i
GO:0060537	i
GO:0014706	i
GO:0070286	i
GO:0060047	i
GO:0003015	i
GO:0007517	i
GO:0042692	i
GO:0031424	i
GO:0048747	i
GO:0001578	i
GO:0060538	i
GO:0031032	i
GO:0007519	i
GO:0034765	i
GO:0034762	i
GO:0008016	i
GO:1903522	i
GO:0014888	i
GO:0014902	i
GO:0060048	i
GO:0090257	i
GO:0006937	i
GO:1904062	i
GO:0030216	i
GO:0009913	i
GO:0036158	i
GO:0007018	i
GO:0006942	i
GO:0006958	i
GO:0002455	i
GO:0060415	i
GO:0032409	i
GO:0010959	i
GO:0048738	i
GO:0048644	i
GO:0022898	i
GO:0070296	i
GO:0055008	i
GO:1903779	i
GO:0032412	i
GO:0006956	i
GO:0072376	i
GO:0003007	i
GO:0043501	i
GO:0042391	i
GO:0001539	i
GO:0014808	i
GO:1903514	i
GO:0055013	i
GO:0006006	i
GO:0036159	i
GO:0051279	i
GO:0002026	i
GO:0034767	i
GO:0034764	i
GO:1904064	i
GO:0043588	i
GO:0071688	i
GO:0031034	i
GO:0031033	i
GO:0060285	i
GO:0010880	i
GO:0051194	i
GO:0051197	i
GO:0006910	i
GO:0006813	i
GO:0008544	i
GO:0019318	i
GO:0072507	i
GO:0014823	i
GO:0048741	i
GO:0014904	i
GO:0006639	i
GO:0006638	i
GO:0001580	i
GO:0050913	i
GO:0050912	i
GO:0014733	i
GO:0030574	i
GO:0044243	i
GO:0001895	i
GO:0030199	i
GO:0014819	i
GO:0006911	i
GO:0055074	i
GO:0072503	i
GO:0006874	i
GO:0014850	i
GO:0032963	i
GO:0044259	i
GO:0010830	i
GO:0002920	i
GO:0005996	i
GO:0032411	i
GO:0030198	i
GO:0043062	i
GO:0071804	i
GO:0071805	i
GO:0006959	i
GO:0001894	i
GO:0014874	i
GO:0006641	i
GO:1902476	i
GO:0044236	i
GO:0002526	i
GO:0006821	i
GO:0016266	i
GO:0006936	ii
GO:0003012	ii
GO:0030049	ii
GO:0033275	ii
GO:0070252	ii
GO:0030239	ii
GO:0030048	ii
GO:0006941	ii
GO:0010927	ii
GO:0003341	ii
GO:0055001	ii
GO:0060047	ii
GO:0003009	ii
GO:0003015	ii
GO:0045214	ii
GO:0070268	ii
GO:0055002	ii
GO:0050879	ii
GO:0050881	ii
GO:0051146	ii
GO:0034765	ii
GO:0008016	ii
GO:0034762	ii
GO:0031032	ii
GO:0031424	ii
GO:0043501	ii
GO:0070286	ii
GO:0035082	ii
GO:1903522	ii
GO:0042692	ii
GO:0043588	ii
GO:0007517	ii
GO:0014706	ii
GO:0060537	ii
GO:0014888	ii
GO:1904062	ii
GO:0060538	ii
GO:0001578	ii
GO:0060048	ii
GO:0048747	ii
GO:0070296	ii
GO:0030216	ii
GO:0008544	ii
GO:0006937	ii
GO:0090257	ii
GO:0070588	ii
GO:0032409	ii
GO:0097553	ii
GO:0007519	ii
GO:0006942	ii
GO:0006816	ii
GO:0009913	ii
GO:0072511	ii
GO:0022898	ii
GO:0070838	ii
GO:0032412	ii
GO:0055008	ii
GO:0010959	ii
GO:1903169	ii
GO:0014808	ii
GO:2000021	ii
GO:0035637	ii
GO:0042391	ii
GO:1903514	ii
GO:0060415	ii
GO:0014902	ii
GO:0010880	ii
GO:0061337	ii
GO:0048644	ii
GO:1903779	ii
GO:0051924	ii
GO:0007018	ii
GO:0043500	ii
GO:0003007	ii
GO:0002027	ii
GO:0001895	ii
GO:0043270	ii
GO:1902904	ii
GO:0071688	ii
GO:0031034	ii
GO:0031033	ii
GO:0036159	ii
GO:0051209	ii
GO:0051283	ii
GO:0051282	ii
GO:0051208	ii
GO:0060402	ii
GO:0060401	ii
GO:0014819	ii
GO:0010830	ii
GO:0034767	ii
GO:0034764	ii
GO:0051899	ii
GO:0002026	ii
GO:0001539	ii
GO:1904064	ii
GO:0051279	ii
GO:0010522	ii
GO:0072507	ii
GO:0071804	ii
GO:0071805	ii
GO:1901879	ii
GO:0001580	ii
GO:0050912	ii
GO:0014733	ii
GO:0055074	ii
GO:0006874	ii
GO:0050913	ii
GO:0051480	ii
GO:0036158	ii
GO:0072503	ii
GO:0030199	ii
GO:0050909	ii
GO:0043242	ii
GO:0048871	ii
GO:0032411	ii
GO:0014823	ii
GO:0003208	ii
GO:0030198	ii
GO:0043062	ii
GO:0014874	ii
GO:0014850	ii
GO:1901880	ii
GO:1904427	ii
GO:0030574	ii
GO:0044243	ii
GO:0051693	ii
GO:0030835	ii
GO:0015671	ii
GO:0035725	ii
GO:0019730	ii
GO:0051281	ii
GO:0032963	ii
GO:0044259	ii
GO:0015669	ii
GO:0009954	ii
GO:0030049	iii
GO:0033275	iii
GO:0006936	iii
GO:0003012	iii
GO:0030239	iii
GO:0070252	iii
GO:0010927	iii
GO:0030048	iii
GO:0006941	iii
GO:0055001	iii
GO:0003341	iii
GO:0055002	iii
GO:0045214	iii
GO:0003009	iii
GO:0070268	iii
GO:0051146	iii
GO:0031424	iii
GO:0060047	iii
GO:0050879	iii
GO:0050881	iii
GO:0003015	iii
GO:0035082	iii
GO:0070286	iii
GO:0031032	iii
GO:0014706	iii
GO:0042692	iii
GO:0060537	iii
GO:0043501	iii
GO:0034765	iii
GO:0043588	iii
GO:0034762	iii
GO:0030216	iii
GO:0071688	iii
GO:0007517	iii
GO:0008016	iii
GO:0048747	iii
GO:0031034	iii
GO:0009913	iii
GO:0031033	iii
GO:0008544	iii
GO:0001578	iii
GO:1904062	iii
GO:1903522	iii
GO:0014888	iii
GO:0010959	iii
GO:0060538	iii
GO:0070296	iii
GO:0007519	iii
GO:2000021	iii
GO:1903169	iii
GO:0006937	iii
GO:0090257	iii
GO:0070588	iii
GO:0055008	iii
GO:0006942	iii
GO:0060048	iii
GO:0006816	iii
GO:0048738	iii
GO:0051924	iii
GO:0060415	iii
GO:0022898	iii
GO:0001895	iii
GO:0032412	iii
GO:0072511	iii
GO:0048644	iii
GO:0014808	iii
GO:0070838	iii
GO:1903514	iii
GO:0032409	iii
GO:0010880	iii
GO:0007018	iii
GO:1903779	iii
GO:1901019	iii
GO:0061337	iii
GO:0097553	iii
GO:0060402	iii
GO:0060401	iii
GO:0036159	iii
GO:0051209	iii
GO:0051283	iii
GO:0051282	iii
GO:0051208	iii
GO:0014819	iii
GO:0051279	iii
GO:0010522	iii
GO:0072507	iii
GO:0036158	iii
GO:0002026	iii
GO:0001539	iii
GO:0055074	iii
GO:0043270	iii
GO:0051480	iii
GO:0001580	iii
GO:0050912	iii
GO:0006874	iii
GO:0014733	iii
GO:0072503	iii
GO:0050913	iii
GO:0034767	iii
GO:0034764	iii
GO:1904064	iii
GO:0003229	iii
GO:0030199	iii
GO:0050909	iii
GO:0048871	iii
GO:0014874	iii
GO:0014850	iii
GO:0003208	iii
GO:1902476	iii
GO:0019730	iii
GO:1904427	iii
GO:0030049	iv
GO:0033275	iv
GO:0006936	iv
GO:0003012	iv
GO:0070252	iv
GO:0030048	iv
GO:0070268	iv
GO:0030239	iv
GO:0010927	iv
GO:0006941	iv
GO:0031424	iv
GO:0030574	iv
GO:0045214	iv
GO:0043588	iv
GO:0044243	iv
GO:0055001	iv
GO:0055002	iv
GO:0060047	iv
GO:0030198	iv
GO:0003015	iv
GO:0043062	iv
GO:0003341	iv
GO:0060537	iv
GO:0003009	iv
GO:0014706	iv
GO:0030216	iv
GO:0008544	iv
GO:0009913	iv
GO:0043501	iv
GO:0007517	iv
GO:0051146	iv
GO:0050879	iv
GO:0050881	iv
GO:0008016	iv
GO:0060538	iv
GO:0034765	iv
GO:0030199	iv
GO:0034762	iv
GO:0060415	iv
GO:0031032	iv
GO:0014888	iv
GO:0007519	iv
GO:0055008	iv
GO:1903522	iv
GO:0048644	iv
GO:0042692	iv
GO:0060048	iv
GO:0006937	iv
GO:0090257	iv
GO:1904062	iv
GO:0048747	iv
GO:0071688	iv
GO:0070286	iv
GO:0070296	iv
GO:0070588	iv
GO:0001895	iv
GO:0031034	iv
GO:2000021	iv
GO:0032409	iv
GO:0035637	iv
GO:0006942	iv
GO:0006816	iv
GO:0014808	iv
GO:0031033	iv
GO:0048738	iv
GO:1903169	iv
GO:0035082	iv
GO:0022898	iv
GO:1903514	iv
GO:0010959	iv
GO:0032412	iv
GO:0010880	iv
GO:0051924	iv
GO:0061337	iv
GO:0072511	iv
GO:0042391	iv
GO:0070838	iv
GO:0002027	iv
GO:0014902	iv
GO:0055074	iv
GO:0051209	iv
GO:0051283	iv
GO:0051282	iv
GO:0051208	iv
GO:0032963	iv
GO:0044259	iv
GO:0006874	iv
GO:0097553	iv
GO:0002026	iv
GO:0060402	iv
GO:0060401	iv
GO:0051279	iv
GO:0010522	iv
GO:0001580	iv
GO:0050912	iv
GO:0051899	iv
GO:0044236	iv
GO:0014733	iv
GO:0050913	iv
GO:0034767	iv
GO:0014819	iv
GO:0044550	iv
GO:0050909	iv
GO:0003208	iv
GO:0014850	iv
GO:0015671	iv
GO:0015669	iv
GO:0009954	iv
GO:1904427	iv
GO:0035725	iv
GO:0035987	iv

## Sheet: KIRC_Stage
ID	Stages
GO:0006814	i
GO:0072006	i
GO:0072073	i
GO:0072009	i
GO:0001822	i
GO:0072001	i
GO:0061326	i
GO:0001655	i
GO:0015698	i
GO:0098656	i
GO:0015711	i
GO:0022407	i
GO:0046942	i
GO:0015849	i
GO:0050900	i
GO:0051249	i
GO:0050863	i
GO:0060562	i
GO:1903037	i
GO:0007159	i
GO:0002449	i
GO:0042110	i
GO:1901615	i
GO:0010038	i
GO:0035239	i
GO:0035725	i
GO:0007162	i
GO:0072080	i
GO:0098661	i
GO:0007389	i
GO:0060993	i
GO:0051235	i
GO:0002460	i
GO:0045785	i
GO:0001657	i
GO:0072163	i
GO:0072164	i
GO:0001656	i
GO:0010876	i
GO:0055067	i
GO:0006816	i
GO:0001823	i
GO:0006869	i
GO:0003002	i
GO:0007588	i
GO:0070838	i
GO:0006953	i
GO:0050663	i
GO:0060541	i
GO:0006641	i
GO:0061333	i
GO:0072511	i
GO:0002526	i
GO:0042493	i
GO:0002697	i
GO:0006639	i
GO:0006638	i
GO:0072028	i
GO:0046503	i
GO:0072175	i
GO:0016331	i
GO:0050707	i
GO:0061318	i
GO:0072112	i
GO:0055078	i
GO:0051346	i
GO:0072078	i
GO:0072088	i
GO:0035148	i
GO:0015718	i
GO:0015850	i
GO:0019932	i
GO:0015914	i
GO:0032496	i
GO:0002237	i
GO:0019724	i
GO:0006835	i
GO:0032835	i
GO:0072311	i
GO:0072010	i
GO:0046461	i
GO:0046464	i
GO:0001838	i
GO:0070098	i
GO:0010959	i
GO:0048608	i
GO:0061458	i
GO:0008202	i
GO:0034372	i
GO:0002695	i
GO:0060402	i
GO:0016064	i
GO:0050866	i
GO:0050953	i
GO:0044706	i
GO:0019433	i
GO:0050994	i
GO:0006584	i
GO:0009712	i
GO:0097164	i
GO:0006821	i
GO:0007601	i
GO:0051048	i
GO:1905952	i
GO:0072207	i
GO:0061005	i
GO:0030198	i
GO:0043062	i
GO:0033700	i
GO:0043691	i
GO:0060675	i
GO:0072171	i
GO:0035850	i
GO:0055074	i
GO:0010818	i
GO:0034367	i
GO:0034368	i
GO:0034369	i
GO:0017144	i
GO:0042157	i
GO:0022408	i
GO:0001658	i
GO:0061138	i
GO:0006956	i
GO:0006813	i
GO:0048754	i
GO:0045619	i
GO:0090596	i
GO:0006958	i
GO:0010043	i
GO:1904478	i
GO:0010872	i
GO:0050673	i
GO:0006817	i
GO:0001763	i
GO:0030595	i
GO:0007204	i
GO:0072676	i
GO:0042133	i
GO:0006874	i
GO:1902476	i
GO:0072507	i
GO:0060537	i
GO:0048732	i
GO:0072376	i
GO:1903317	i
GO:0032103	i
GO:0030449	i
GO:0072079	i
GO:0051004	i
GO:0072070	i
GO:0034375	i
GO:0035435	i
GO:0002455	i
GO:0045861	i
GO:0010951	i
GO:0071804	i
GO:0071805	i
GO:2000257	i
GO:0072503	i
GO:0070613	i
GO:0019835	i
GO:0003338	i
GO:0030195	i
GO:1900047	i
GO:0060192	i
GO:0042136	i
GO:0045940	i
GO:0072243	i
GO:0072012	i
GO:0061437	i
GO:0061440	i
GO:0003208	i
GO:0002673	i
GO:0001505	i
GO:2000021	i
GO:0010466	i
GO:0048738	i
GO:0060326	i
GO:0035376	i
GO:0070508	i
GO:0010896	i
GO:0034384	i
GO:0072017	i
GO:0045661	i
GO:0010817	i
GO:0051480	i
GO:0050819	i
GO:0030004	i
GO:0003014	i
GO:0032369	i
GO:0090207	i
GO:0072210	i
GO:0051453	i
GO:0030641	i
GO:0002455	ii
GO:0006958	ii
GO:0006959	ii
GO:0002449	ii
GO:0019724	ii
GO:0006956	ii
GO:0016064	ii
GO:0072376	ii
GO:0002460	ii
GO:0002920	ii
GO:0006909	ii
GO:0002768	ii
GO:0002429	ii
GO:0051249	ii
GO:0006910	ii
GO:0030449	ii
GO:0002526	ii
GO:2000257	ii
GO:0050900	ii
GO:0006911	ii
GO:0002673	ii
GO:0051251	ii
GO:0002696	ii
GO:0050867	ii
GO:0099024	ii
GO:1903317	ii
GO:0050864	ii
GO:0070613	ii
GO:0050853	ii
GO:0010324	ii
GO:0002697	ii
GO:0008037	ii
GO:0042742	ii
GO:0050871	ii
GO:0006898	ii
GO:0042113	ii
GO:0038094	ii
GO:0002431	ii
GO:0002433	ii
GO:0038096	ii
GO:0050727	ii
GO:0006814	ii
GO:0016485	ii
GO:0050851	ii
GO:0007159	ii
GO:0042110	ii
GO:0050863	ii
GO:1903037	ii
GO:0051604	ii
GO:0022407	ii
GO:0001906	ii
GO:0050870	ii
GO:1903039	ii
GO:0002377	ii
GO:0038093	ii
GO:0045785	ii
GO:0022409	ii
GO:0038095	ii
GO:0002440	ii
GO:0072073	ii
GO:0030595	ii
GO:0050670	ii
GO:0001822	ii
GO:0032944	ii
GO:0070663	ii
GO:0046651	ii
GO:0032943	ii
GO:0015698	ii
GO:0070661	ii
GO:0002228	ii
GO:0072001	ii
GO:0001655	ii
GO:0042267	ii
GO:0001909	ii
GO:0002706	ii
GO:0042098	ii
GO:0031341	ii
GO:0002521	ii
GO:0098656	ii
GO:0042129	ii
GO:0002703	ii
GO:0015711	ii
GO:0032609	ii
GO:0015849	ii
GO:0046942	ii
GO:0002708	ii
GO:0050671	ii
GO:0032946	ii
GO:0030098	ii
GO:0042102	ii
GO:0030217	ii
GO:0002699	ii
GO:0070665	ii
GO:1901615	ii
GO:0045619	ii
GO:0019722	ii
GO:0002683	ii
GO:0032649	ii
GO:1902105	ii
GO:0002705	ii
GO:0007162	ii
GO:0046631	ii
GO:0072009	ii
GO:0072006	ii
GO:0001910	ii
GO:0002695	ii
GO:0060326	ii
GO:0031295	ii
GO:0031294	ii
GO:0010038	ii
GO:0050866	ii
GO:0032496	ii
GO:0002237	ii
GO:0072678	ii
GO:0070098	ii
GO:0019932	ii
GO:0048871	ii
GO:0002715	ii
GO:0035725	ii
GO:0098661	ii
GO:0032103	ii
GO:0031343	ii
GO:0019835	ii
GO:0006968	ii
GO:0055067	ii
GO:0007204	ii
GO:0072080	ii
GO:0061326	ii
GO:0042269	ii
GO:0060993	ii
GO:0007588	ii
GO:0006835	ii
GO:0006816	ii
GO:0042493	ii
GO:0001656	ii
GO:0072676	ii
GO:0051250	ii
GO:0001912	ii
GO:0070838	ii
GO:0072511	ii
GO:0035239	ii
GO:0055078	ii
GO:0001894	ii
GO:0007389	ii
GO:0051346	ii
GO:0050850	ii
GO:0072507	ii
GO:0072175	ii
GO:0001657	ii
GO:0072163	ii
GO:0072164	ii
GO:0002685	ii
GO:0010818	ii
GO:0051480	ii
GO:0006813	ii
GO:0001823	ii
GO:0072028	ii
GO:0006874	ii
GO:0055074	ii
GO:0010951	ii
GO:0016331	ii
GO:0006953	ii
GO:0072078	ii
GO:0072088	ii
GO:0061333	ii
GO:0032835	ii
GO:0072070	ii
GO:0055075	ii
GO:0003002	ii
GO:0007601	ii
GO:0050953	ii
GO:0007218	ii
GO:0072503	ii
GO:0003208	ii
GO:0010466	ii
GO:0042417	ii
GO:0051048	ii
GO:0042133	ii
GO:2000021	ii
GO:0071772	ii
GO:0071773	ii
GO:0002449	iii
GO:0006959	iii
GO:0002460	iii
GO:0002455	iii
GO:0006958	iii
GO:0019724	iii
GO:0016064	iii
GO:0002526	iii
GO:0072376	iii
GO:0006956	iii
GO:0050900	iii
GO:0002920	iii
GO:0051249	iii
GO:0002696	iii
GO:0050867	iii
GO:0002697	iii
GO:0051251	iii
GO:0002673	iii
GO:0006909	iii
GO:0030449	iii
GO:2000257	iii
GO:0007159	iii
GO:0002768	iii
GO:0050863	iii
GO:0002429	iii
GO:1903317	iii
GO:0050870	iii
GO:0022407	iii
GO:0006814	iii
GO:0022409	iii
GO:0070613	iii
GO:0042110	iii
GO:1903037	iii
GO:0015698	iii
GO:0045785	iii
GO:1903039	iii
GO:0098656	iii
GO:0001906	iii
GO:0016485	iii
GO:0072073	iii
GO:0006898	iii
GO:0038094	iii
GO:0002431	iii
GO:0001655	iii
GO:0050864	iii
GO:0002433	iii
GO:0038096	iii
GO:0006911	iii
GO:0001822	iii
GO:0002703	iii
GO:0099024	iii
GO:0072001	iii
GO:0050727	iii
GO:0001909	iii
GO:0051604	iii
GO:0010324	iii
GO:0050670	iii
GO:0032944	iii
GO:0002228	iii
GO:0046651	iii
GO:0032943	iii
GO:0042098	iii
GO:0042267	iii
GO:0070663	iii
GO:0002706	iii
GO:0050871	iii
GO:0015711	iii
GO:0042113	iii
GO:0042129	iii
GO:0045619	iii
GO:0002699	iii
GO:0050853	iii
GO:0050851	iii
GO:0070661	iii
GO:0046634	iii
GO:0050671	iii
GO:0032946	iii
GO:0002705	iii
GO:0046942	iii
GO:0002521	iii
GO:0042102	iii
GO:1902105	iii
GO:0070665	iii
GO:0002708	iii
GO:0032609	iii
GO:0046631	iii
GO:0015849	iii
GO:0045580	iii
GO:0030217	iii
GO:0002695	iii
GO:0030098	iii
GO:2000106	iii
GO:0071887	iii
GO:1901615	iii
GO:0032649	iii
GO:0032653	iii
GO:0038093	iii
GO:0032613	iii
GO:0002440	iii
GO:0002285	iii
GO:0008037	iii
GO:0050866	iii
GO:0006910	iii
GO:0030595	iii
GO:0002822	iii
GO:0002819	iii
GO:0019722	iii
GO:0031341	iii
GO:0046632	iii
GO:0045582	iii
GO:0045621	iii
GO:0060326	iii
GO:0007162	iii
GO:0072009	iii
GO:0002237	iii
GO:0072006	iii
GO:0032103	iii
GO:0006885	iii
GO:0001910	iii
GO:0055067	iii
GO:0002715	iii
GO:0031295	iii
GO:0031294	iii
GO:0032496	iii
GO:0072678	iii
GO:0002824	iii
GO:0002821	iii
GO:0051453	iii
GO:0030641	iii
GO:0006968	iii
GO:0048871	iii
GO:0007389	iii
GO:0002704	iii
GO:0046635	iii
GO:0007588	iii
GO:0051250	iii
GO:0072676	iii
GO:0015718	iii
GO:0042269	iii
GO:0060562	iii
GO:0061326	iii
GO:0035725	iii
GO:0010038	iii
GO:0070228	iii
GO:0046637	iii
GO:0070098	iii
GO:0003002	iii
GO:0030004	iii
GO:0031343	iii
GO:0035239	iii
GO:0019835	iii
GO:0098661	iii
GO:0022408	iii
GO:0072080	iii
GO:0097028	iii
GO:0046641	iii
GO:0019932	iii
GO:0001656	iii
GO:0001894	iii
GO:0060993	iii
GO:0050868	iii
GO:0001912	iii
GO:0030100	iii
GO:0030195	iii
GO:1900047	iii
GO:0001657	iii
GO:0072163	iii
GO:0072164	iii
GO:0055078	iii
GO:0050819	iii
GO:0001823	iii
GO:0050850	iii
GO:0007204	iii
GO:0098742	iii
GO:0042730	iii
GO:0008202	iii
GO:0061333	iii
GO:0071772	iii
GO:0071773	iii
GO:0006816	iii
GO:0014014	iii
GO:0051924	iii
GO:0006953	iii
GO:0014013	iii
GO:0048568	iii
GO:0072028	iii
GO:0010818	iii
GO:0097529	iii
GO:0097530	iii
GO:0030509	iii
GO:0072070	iii
GO:0051055	iii
GO:0009713	iii
GO:0042423	iii
GO:0006813	iii
GO:0048247	iii
GO:0072078	iii
GO:0072088	iii
GO:0071804	iii
GO:0071805	iii
GO:0042133	iii
GO:0002455	iv
GO:0002449	iv
GO:0006958	iv
GO:0002460	iv
GO:0006959	iv
GO:0019724	iv
GO:0051249	iv
GO:0016064	iv
GO:0072376	iv
GO:0006956	iv
GO:0051251	iv
GO:0002696	iv
GO:0002526	iv
GO:0050867	iv
GO:0002920	iv
GO:0002697	iv
GO:0050900	iv
GO:0006909	iv
GO:0030449	iv
GO:2000257	iv
GO:1903317	iv
GO:0050863	iv
GO:0007159	iv
GO:0002768	iv
GO:0070613	iv
GO:0002673	iv
GO:0002429	iv
GO:0050870	iv
GO:1903037	iv
GO:0042110	iv
GO:0022409	iv
GO:1903039	iv
GO:0022407	iv
GO:0038094	iv
GO:0002431	iv
GO:0002433	iv
GO:0038096	iv
GO:0006911	iv
GO:0050864	iv
GO:0099024	iv
GO:0006910	iv
GO:0016485	iv
GO:0050727	iv
GO:0015698	iv
GO:0042742	iv
GO:0010324	iv
GO:0050871	iv
GO:0045785	iv
GO:0050670	iv
GO:0098656	iv
GO:0032944	iv
GO:0050853	iv
GO:0070663	iv
GO:0051604	iv
GO:0046651	iv
GO:0032943	iv
GO:0006898	iv
GO:0030595	iv
GO:0042098	iv
GO:0002440	iv
GO:0042129	iv
GO:0070661	iv
GO:0042102	iv
GO:0042113	iv
GO:0050671	iv
GO:0050851	iv
GO:0032946	iv
GO:0060326	iv
GO:0002703	iv
GO:0070665	iv
GO:0038093	iv
GO:0001906	iv
GO:0002377	iv
GO:0045619	iv
GO:0045580	iv
GO:0008037	iv
GO:0031295	iv
GO:0002706	iv
GO:0031294	iv
GO:0046634	iv
GO:0002699	iv
GO:0045582	iv
GO:0030217	iv
GO:0032609	iv
GO:0015711	iv
GO:0072073	iv
GO:0002237	iv
GO:0038095	iv
GO:0002228	iv
GO:0046631	iv
GO:0032649	iv
GO:0045621	iv
GO:0002708	iv
GO:1902105	iv
GO:0051250	iv
GO:0001909	iv
GO:0050866	iv
GO:0031341	iv
GO:0015849	iv
GO:0046942	iv
GO:0001819	iv
GO:0002705	iv
GO:0030098	iv
GO:0002521	iv
GO:0002695	iv
GO:0042267	iv
GO:0032653	iv
GO:0046635	iv
GO:0032613	iv
GO:0001655	iv
GO:0032103	iv
GO:0071887	iv
GO:0002822	iv
GO:0001822	iv
GO:0002819	iv
GO:0072001	iv
GO:2000106	iv
GO:1902107	iv
GO:0046632	iv
GO:1901615	iv
GO:0032729	iv
GO:0007162	iv
GO:0001910	iv
GO:0043252	iv
GO:0032496	iv
GO:0043367	iv
GO:0055067	iv
GO:0002715	iv
GO:0048871	iv
GO:0006968	iv
GO:0002700	iv
GO:0035710	iv
GO:0000083	iv
GO:0097530	iv
GO:0072006	iv
GO:0006814	iv
GO:0006885	iv
GO:0046637	iv
GO:0072009	iv
GO:0070227	iv
GO:0022408	iv
GO:1990266	iv
GO:0031343	iv
GO:0050868	iv
GO:0042269	iv
GO:0007588	iv
GO:1903038	iv
GO:0002824	iv
GO:0051453	iv
GO:0030641	iv
GO:0002821	iv
GO:0002704	iv
GO:0001912	iv
GO:0097028	iv
GO:0046641	iv
GO:0046640	iv
GO:0097529	iv
GO:0030004	iv
GO:0030593	iv
GO:0043370	iv
GO:2000107	iv
GO:0072540	iv
GO:0072678	iv
GO:2000514	iv
GO:0070098	iv
GO:0070228	iv
GO:0001656	iv
GO:0035725	iv
GO:0071621	iv
GO:0019722	iv
GO:0006953	iv
GO:0032892	iv
GO:0072080	iv
GO:0061326	iv
GO:0050663	iv
GO:0072676	iv
GO:0001657	iv
GO:0072163	iv
GO:0072164	iv
GO:0001894	iv
GO:0098661	iv
GO:0001773	iv
GO:0032733	iv
GO:0019835	iv
GO:0055078	iv
GO:0030195	iv
GO:1900047	iv
GO:0042493	iv
GO:0036037	iv
GO:0001823	iv
GO:0060993	iv
GO:0050707	iv
GO:0050819	iv
GO:0002685	iv
GO:0002577	iv
GO:0045954	iv
GO:0002717	iv
GO:0032945	iv
GO:0050672	iv
GO:0070664	iv
GO:0050848	iv
GO:0006775	iv
GO:0072028	iv
GO:0051924	iv
GO:0072078	iv
GO:0072088	iv
GO:0061333	iv
GO:0007389	iv
GO:0006816	iv
GO:0002517	iv
GO:0060402	iv
GO:0048736	iv
GO:0060173	iv
GO:0010818	iv
GO:0002507	iv
GO:0042730	iv
GO:0050850	iv
GO:0002664	iv
GO:0097154	iv
GO:0003002	iv
GO:0002643	iv
GO:0050953	iv
GO:0002702	iv
GO:0003231	iv
GO:0051346	iv
GO:0048562	iv

## Sheet: KIRP_Stage
ID	Stages
GO:0098656	i
GO:0001655	i
GO:0006814	i
GO:0072001	i
GO:0001822	i
GO:0015711	i
GO:0046942	i
GO:0015849	i
GO:0010876	i
GO:1901615	i
GO:0006869	i
GO:0016042	i
GO:0044242	i
GO:1901606	i
GO:0006631	i
GO:0007389	i
GO:0072009	i
GO:0006885	i
GO:0015718	i
GO:0015698	i
GO:0016053	i
GO:0046394	i
GO:0008652	i
GO:0003002	i
GO:0072073	i
GO:0051453	i
GO:0030641	i
GO:0072006	i
GO:0006641	i
GO:0006639	i
GO:0006638	i
GO:0061326	i
GO:1901568	i
GO:0060541	i
GO:0072080	i
GO:0030004	i
GO:0002237	i
GO:0007588	i
GO:0035725	i
GO:0048608	i
GO:0061458	i
GO:0002064	i
GO:0061318	i
GO:0072112	i
GO:0072311	i
GO:1901616	i
GO:0048871	i
GO:0007548	i
GO:0032496	i
GO:0050880	i
GO:0055067	i
GO:0015850	i
GO:0060993	i
GO:1905039	i
GO:1903825	i
GO:0035150	i
GO:0030324	i
GO:0030323	i
GO:0043270	i
GO:0061005	i
GO:0009064	i
GO:0042445	i
GO:0072010	i
GO:0061333	i
GO:1904062	i
GO:0006833	i
GO:0055088	i
GO:0016101	i
GO:0008202	i
GO:0034765	i
GO:0060191	i
GO:0006721	i
GO:0001523	i
GO:0032309	i
GO:0071715	i
GO:1901571	i
GO:0098661	i
GO:0032835	i
GO:0034762	i
GO:0072529	i
GO:0006937	i
GO:0006720	i
GO:0001656	i
GO:0050891	i
GO:0030104	i
GO:0072078	i
GO:0072088	i
GO:0072028	i
GO:0003018	i
GO:0055083	i
GO:1901342	i
GO:0003073	i
GO:0035296	i
GO:0097746	i
GO:0035637	i
GO:0015804	i
GO:0008217	i
GO:0007530	i
GO:0032369	i
GO:1901569	i
GO:0072015	i
GO:0072310	i
GO:0001503	i
GO:0072210	i
GO:0046503	i
GO:0018958	i
GO:0030195	i
GO:1900047	i
GO:0050819	i
GO:0061045	i
GO:1903035	i
GO:0030193	i
GO:1900046	i
GO:0050818	i
GO:0051346	i
GO:0050886	i
GO:0001990	i
GO:0035850	i
GO:0003044	i
GO:0021879	i
GO:0019932	i
GO:0018108	i
GO:0018212	i
GO:0006936	i
GO:0006821	i
GO:0003091	i
GO:0045765	i
GO:0007411	i
GO:0097485	i
GO:0018410	i
GO:0001823	i
GO:0090257	i
GO:0032368	i
GO:0034767	i
GO:0034764	i
GO:0060537	i
GO:0051004	i
GO:0046660	i
GO:0001655	ii
GO:0072001	ii
GO:0015711	ii
GO:0001822	ii
GO:0002526	ii
GO:0006959	ii
GO:0072009	ii
GO:0016485	ii
GO:0072376	ii
GO:0002673	ii
GO:1903317	ii
GO:0002920	ii
GO:0006956	ii
GO:0070613	ii
GO:0006958	ii
GO:0050900	ii
GO:0002455	ii
GO:0030449	ii
GO:2000257	ii
GO:0016064	ii
GO:0019724	ii
GO:0099024	ii
GO:0006911	ii
GO:0042119	ii
GO:0002446	ii
GO:0072073	ii
GO:0051604	ii
GO:0050727	ii
GO:0002886	ii
GO:0015849	ii
GO:0072006	ii
GO:0006885	ii
GO:0006814	ii
GO:0031667	ii
GO:0006898	ii
GO:0035239	ii
GO:1901615	ii
GO:0060326	ii
GO:0061326	ii
GO:0009991	ii
GO:0097529	ii
GO:0046942	ii
GO:0098656	ii
GO:0015698	ii
GO:0097530	ii
GO:0060562	ii
GO:0032103	ii
GO:0072080	ii
GO:0030593	ii
GO:0051453	ii
GO:0097028	ii
GO:0007389	ii
GO:1990266	ii
GO:0071621	ii
GO:0060993	ii
GO:0006869	ii
GO:0061333	ii
GO:0015718	ii
GO:0043270	ii
GO:0008652	ii
GO:1903305	ii
GO:0010876	ii
GO:0002237	ii
GO:0072078	ii
GO:0072088	ii
GO:0072028	ii
GO:0003002	ii
GO:0030004	ii
GO:0032496	ii
GO:0006641	ii
GO:0055067	ii
GO:0044070	ii
GO:0007588	ii
GO:0071276	ii
GO:0018410	ii
GO:0061005	ii
GO:0001823	ii
GO:0002064	ii
GO:1903825	ii
GO:0035725	ii
GO:0055083	ii
GO:0006690	ii
GO:0071248	ii
GO:0071241	ii
GO:0032835	ii
GO:0008217	ii
GO:0015804	ii
GO:0033003	ii
GO:0002524	ii
GO:0000083	ii
GO:0006022	ii
GO:0001656	ii
GO:0098661	ii
GO:0007565	ii
GO:0019373	ii
GO:1903306	ii
GO:0030195	ii
GO:1900047	ii
GO:0050819	ii
GO:1903725	ii
GO:0034765	ii
GO:0034762	ii
GO:0017144	ii
GO:0045742	ii
GO:1901186	ii
GO:0035850	ii
GO:0002887	ii
GO:0043301	ii
GO:0002864	ii
GO:0098656	iii
GO:0015698	iii
GO:0015711	iii
GO:0001655	iii
GO:0072001	iii
GO:0007059	iii
GO:0098813	iii
GO:0001822	iii
GO:0015849	iii
GO:0046942	iii
GO:0072009	iii
GO:0000819	iii
GO:0010876	iii
GO:0140014	iii
GO:0000280	iii
GO:0000070	iii
GO:0048285	iii
GO:0010965	iii
GO:0051304	iii
GO:0006885	iii
GO:0051306	iii
GO:0030071	iii
GO:1905818	iii
GO:1902099	iii
GO:0007088	iii
GO:0007091	iii
GO:0051783	iii
GO:0044784	iii
GO:0016042	iii
GO:1901615	iii
GO:0007062	iii
GO:0051983	iii
GO:0033047	iii
GO:0006814	iii
GO:0072073	iii
GO:0006641	iii
GO:0006869	iii
GO:0072006	iii
GO:0031577	iii
GO:0006639	iii
GO:0006638	iii
GO:0051453	iii
GO:0030641	iii
GO:0042044	iii
GO:0061326	iii
GO:0055067	iii
GO:0071459	iii
GO:0015718	iii
GO:2000816	iii
GO:1905819	iii
GO:0072080	iii
GO:0098661	iii
GO:0030004	iii
GO:0006833	iii
GO:0060993	iii
GO:0051346	iii
GO:0007588	iii
GO:0035725	iii
GO:0048871	iii
GO:0061333	iii
GO:0002064	iii
GO:1903825	iii
GO:0001656	iii
GO:0019755	iii
GO:0046503	iii
GO:0072078	iii
GO:0072088	iii
GO:0072028	iii
GO:0043270	iii
GO:0015850	iii
GO:0006821	iii
GO:0060562	iii
GO:0051917	iii
GO:0010951	iii
GO:0001523	iii
GO:0016101	iii
GO:1902476	iii
GO:0006721	iii
GO:0072210	iii
GO:0035239	iii
GO:0060541	iii
GO:0034765	iii
GO:1905039	iii
GO:0045132	iii
GO:0034762	iii
GO:0006720	iii
GO:0042493	iii
GO:0060047	iii
GO:0045861	iii
GO:0010466	iii
GO:0018410	iii
GO:1905952	iii
GO:0003015	iii
GO:0032309	iii
GO:0019730	iii
GO:0003014	iii
GO:0007389	iii
GO:0008016	iii
GO:0055078	iii
GO:0015711	iv
GO:0098656	iv
GO:0000819	iv
GO:0007059	iv
GO:0098813	iv
GO:0001655	iv
GO:0000070	iv
GO:0015849	iv
GO:0015698	iv
GO:0140014	iv
GO:0046942	iv
GO:0000280	iv
GO:0072001	iv
GO:0001822	iv
GO:0072009	iv
GO:0048285	iv
GO:0010965	iv
GO:0051304	iv
GO:0051306	iv
GO:0030071	iv
GO:1902099	iv
GO:0051983	iv
GO:1905818	iv
GO:0007062	iv
GO:0007091	iv
GO:0044784	iv
GO:0007088	iv
GO:0072006	iv
GO:1901615	iv
GO:0033047	iv
GO:0033045	iv
GO:0051783	iv
GO:1902850	iv
GO:0000075	iv
GO:0044242	iv
GO:0006814	iv
GO:0072073	iv
GO:0006869	iv
GO:0008652	iv
GO:0048871	iv
GO:0010876	iv
GO:0016053	iv
GO:0046394	iv
GO:0006885	iv
GO:1903825	iv
GO:0031577	iv
GO:0061326	iv
GO:0042044	iv
GO:0008202	iv
GO:0034502	iv
GO:0031667	iv
GO:0072080	iv
GO:0051453	iv
GO:0030641	iv
GO:0061318	iv
GO:0072112	iv
GO:0072311	iv
GO:0072010	iv
GO:0006641	iv
GO:0006639	iv
GO:0006638	iv
GO:0007588	iv
GO:0009991	iv
GO:0098661	iv
GO:0033559	iv
GO:0017144	iv
GO:2000816	iv
GO:1905819	iv
GO:0033048	iv
GO:0033046	iv
GO:0051985	iv
GO:0045839	iv
GO:0060993	iv
GO:0071459	iv
GO:0055067	iv
GO:0043270	iv
GO:0030004	iv
GO:0061333	iv
GO:0007094	iv
GO:0071173	iv
GO:0071174	iv
GO:0045841	iv
GO:1902100	iv
GO:0006833	iv
GO:0051784	iv
GO:0006690	iv
GO:0008217	iv
GO:0015850	iv
GO:1905039	iv
GO:0072078	iv
GO:0072088	iv
GO:0072028	iv
GO:0034501	iv
GO:0003073	iv
GO:0035725	iv
GO:0010038	iv
GO:0002064	iv
GO:0060541	iv
GO:0140013	iv
GO:0051321	iv
GO:0006865	iv
GO:0019755	iv
GO:0001823	iv
GO:0035637	iv
GO:1903046	iv
GO:1901568	iv
GO:0046503	iv
GO:0050880	iv
GO:0006835	iv
GO:0034765	iv
GO:0003333	iv
GO:0045132	iv
GO:0001656	iv
GO:0035150	iv
GO:0034762	iv
GO:0019433	iv
GO:0051180	iv
GO:0046461	iv
GO:0046464	iv
GO:0042493	iv
GO:0003014	iv
GO:0003018	iv
GO:0000083	iv
GO:0071248	iv
GO:0072210	iv

## Sheet: LUAD_Stage
ID	Stages
GO:0070268	i
GO:0008544	i
GO:0031424	i
GO:0009913	i
GO:0030216	i
GO:0043588	i
GO:0023061	i
GO:0051321	i
GO:0071103	i
GO:0006836	i
GO:0052695	i
GO:0006063	i
GO:0019585	i
GO:0042471	i
GO:0042472	i
GO:0010817	i
GO:0048562	i
GO:0030574	i
GO:0043583	i
GO:0048839	i
GO:0048568	i
GO:0044243	i
GO:0050804	i
GO:0006805	i
GO:0071466	i
GO:0009410	i
GO:0009812	i
GO:0015671	i
GO:0015669	i
GO:0030900	i
GO:0090596	i
GO:0061351	i
GO:0009914	i
GO:0006323	i
GO:0050768	i
GO:0007389	i
GO:0051291	i
GO:0009952	i
GO:0007586	i
GO:0043523	i
GO:0060249	i
GO:0021537	i
GO:0048705	i
GO:0001501	i
GO:0003002	i
GO:0030277	i
GO:0042573	i
GO:0065004	i
GO:0000070	ii
GO:0000280	ii
GO:0000819	ii
GO:0098813	ii
GO:0007059	ii
GO:0140014	ii
GO:0051983	ii
GO:0051321	ii
GO:0048285	ii
GO:0030071	ii
GO:1902099	ii
GO:0007091	ii
GO:0051304	ii
GO:0044784	ii
GO:0010965	ii
GO:0007062	ii
GO:0051306	ii
GO:0140013	ii
GO:1905818	ii
GO:0045132	ii
GO:0008608	ii
GO:0051783	ii
GO:1903046	ii
GO:0008544	ii
GO:0009913	ii
GO:0043588	ii
GO:0070268	ii
GO:0031424	ii
GO:0052695	ii
GO:0006063	ii
GO:0019585	ii
GO:0009410	ii
GO:0006805	ii
GO:0071466	ii
GO:0044243	ii
GO:0015671	ii
GO:0030574	ii
GO:0023061	ii
GO:0030198	ii
GO:0043062	ii
GO:0044236	ii
GO:0006910	ii
GO:0009812	ii
GO:0042471	ii
GO:0061351	ii
GO:0006956	ii
GO:0042472	ii
GO:0048562	ii
GO:0030900	ii
GO:0010721	ii
GO:0072376	ii
GO:0048568	ii
GO:0007389	ii
GO:0015711	ii
GO:0009952	ii
GO:0043583	ii
GO:0030216	iii
GO:0000070	iii
GO:0000819	iii
GO:0051983	iii
GO:0140014	iii
GO:0000280	iii
GO:0098813	iii
GO:0007059	iii
GO:0030071	iii
GO:1902099	iii
GO:0007091	iii
GO:0044784	iii
GO:0051321	iii
GO:0010965	iii
GO:0051306	iii
GO:0048285	iii
GO:0007062	iii
GO:1905818	iii
GO:0051304	iii
GO:0070268	iii
GO:0008544	iii
GO:0009913	iii
GO:0031424	iii
GO:0043588	iii
GO:0023061	iii
GO:0006836	iii
GO:0042472	iii
GO:0009410	iii
GO:0042471	iii
GO:0015671	iii
GO:0051782	iii
GO:0015669	iii
GO:0050804	iii
GO:0030574	iii
GO:0044243	iii
GO:0052695	iii
GO:0006063	iii
GO:0019585	iii
GO:0006805	iii
GO:0071466	iii
GO:0032963	iii
GO:0044259	iii
GO:0048839	iii
GO:0044236	iii
GO:0048568	iii
GO:0043583	iii
GO:0061351	iii
GO:0048562	iii
GO:0050768	iii
GO:0010817	iii
GO:0090596	iii
GO:0010721	iii
GO:0046879	iii
GO:0000070	iv
GO:0007059	iv
GO:0000819	iv
GO:0140014	iv
GO:0000280	iv
GO:0098813	iv
GO:0048285	iv
GO:0051983	iv
GO:0030071	iv
GO:1902099	iv
GO:0007091	iv
GO:0044784	iv
GO:0010965	iv
GO:0051304	iv
GO:1902850	iv
GO:0051321	iv
GO:0007062	iv
GO:0051306	iv
GO:0008608	iv
GO:0007088	iv
GO:1905818	iv
GO:0051783	iv
GO:0033047	iv
GO:0033045	iv
GO:0051310	iv
GO:0007052	iv
GO:0031577	iv
GO:0045132	iv
GO:0071459	iv
GO:0140013	iv
GO:0007094	iv
GO:0071173	iv
GO:0071174	iv
GO:0007093	iv
GO:0034502	iv
GO:0051303	iv
GO:0045841	iv
GO:0033046	iv
GO:0050000	iv
GO:0051985	iv
GO:1902100	iv
GO:0034501	iv
GO:0090307	iv
GO:0007051	iv
GO:0006270	iv
GO:0007080	iv
GO:2000816	iv
GO:1903046	iv
GO:1905819	iv
GO:0000075	iv
GO:0051225	iv
GO:0033048	iv
GO:0045839	iv
GO:0090068	iv
GO:0051784	iv
GO:0000910	iv
GO:0030261	iv
GO:0045840	iv
GO:0000083	iv
GO:0000076	iv
GO:0023061	iv
GO:0006836	iv
GO:0007127	iv
GO:0050804	iv
GO:0070268	iv
GO:0015671	iv
GO:0051782	iv
GO:0008544	iv
GO:0042472	iv
GO:0042471	iv
GO:0030574	iv
GO:0030072	iv
GO:0044243	iv
GO:0006805	iv
GO:0071466	iv
GO:0003018	iv
GO:0061351	iv
GO:0048167	iv
GO:0051315	iv
GO:0009410	iv
GO:0048839	iv
GO:0043583	iv
GO:0051307	iv
GO:0051383	iv
GO:0032963	iv
GO:0030900	iv
GO:0044259	iv
GO:0051101	iv
GO:0010817	iv
GO:0042310	iv
GO:0090596	iv
GO:0044236	iv
GO:0097756	iv
GO:0048562	iv
GO:0046879	iv
GO:0007605	iv
GO:0050954	iv
GO:0009914	iv
GO:0045104	iv
GO:0045103	iv

## Sheet: STAD_Stage
ID	Stages
GO:0072376	i
GO:0006956	i
GO:0006958	i
GO:0002455	i
GO:0006959	i
GO:2000257	i
GO:0030449	i
GO:0016064	i
GO:0019724	i
GO:0002920	i
GO:0070613	i
GO:0002526	i
GO:1903317	i
GO:0002673	i
GO:0002449	i
GO:0002460	i
GO:0006909	i
GO:0002433	i
GO:0038096	i
GO:0006898	i
GO:0038094	i
GO:0002431	i
GO:0016485	i
GO:0051604	i
GO:0038095	i
GO:0050727	i
GO:0002429	i
GO:0006910	i
GO:0050900	i
GO:0002377	i
GO:0002697	i
GO:0002768	i
GO:0038093	i
GO:0007586	i
GO:0006911	i
GO:0050853	i
GO:0042742	i
GO:0099024	i
GO:0002440	i
GO:0010324	i
GO:0008037	i
GO:0050864	i
GO:0070268	i
GO:0050871	i
GO:0031424	i
GO:0030216	i
GO:0043588	i
GO:0018149	i
GO:0042113	i
GO:0009913	i
GO:0008544	i
GO:0050851	i
GO:0006641	i
GO:0006639	i
GO:0006638	i
GO:0015711	i
GO:1903779	i
GO:0050892	i
GO:0033344	i
GO:0019731	i
GO:0019433	i
GO:0006721	i
GO:0006720	i
GO:0046461	i
GO:0046464	i
GO:0015850	i
GO:0008643	i
GO:0034378	i
GO:0030301	i
GO:0015918	i
GO:0022600	i
GO:0046503	i
GO:0006869	i
GO:0034219	i
GO:0017144	i
GO:0052548	i
GO:0034379	i
GO:0071542	i
GO:0032371	i
GO:0032374	i
GO:1905952	i
GO:0071827	i
GO:0019730	i
GO:0010951	i
GO:0070268	ii
GO:0006959	ii
GO:0007586	ii
GO:0072376	ii
GO:0006956	ii
GO:0043588	ii
GO:0006958	ii
GO:0030216	ii
GO:0031424	ii
GO:0002455	ii
GO:0008544	ii
GO:0009913	ii
GO:0002920	ii
GO:0030449	ii
GO:0002526	ii
GO:2000257	ii
GO:0018149	ii
GO:0016064	ii
GO:0002673	ii
GO:0019724	ii
GO:0070613	ii
GO:1903317	ii
GO:0006898	ii
GO:0050900	ii
GO:0002431	ii
GO:0006909	ii
GO:0002377	ii
GO:0016485	ii
GO:0002433	ii
GO:0038096	ii
GO:0002449	ii
GO:0042742	ii
GO:0038094	ii
GO:0002460	ii
GO:0050727	ii
GO:0010466	ii
GO:0051604	ii
GO:0002440	ii
GO:0010951	ii
GO:0038095	ii
GO:0050892	ii
GO:0051346	ii
GO:0045861	ii
GO:0006910	ii
GO:0052547	ii
GO:0006641	ii
GO:0002697	ii
GO:0006911	ii
GO:0006639	ii
GO:0006638	ii
GO:0002429	ii
GO:0052548	ii
GO:0099024	ii
GO:0010324	ii
GO:0002768	ii
GO:0038093	ii
GO:0061436	ii
GO:0033561	ii
GO:0022600	ii
GO:0015850	ii
GO:0016042	ii
GO:0033344	ii
GO:0019433	ii
GO:0046461	ii
GO:0046464	ii
GO:0050891	ii
GO:0030104	ii
GO:0050832	ii
GO:0006869	ii
GO:0034378	ii
GO:0006721	ii
GO:0006720	ii
GO:0009620	ii
GO:0046503	ii
GO:0042157	ii
GO:0048871	ii
GO:0010876	ii
GO:0044241	ii
GO:0034377	ii
GO:0065005	ii
GO:0042493	ii
GO:0019730	ii
GO:0019731	ii
GO:0071827	ii
GO:1904478	ii
GO:0034370	ii
GO:1905952	ii
GO:0032368	ii
GO:0001523	ii
GO:0030299	ii
GO:0098856	ii
GO:0016101	ii
GO:0045104	ii
GO:0045103	ii
GO:0034367	ii
GO:0034368	ii
GO:0034369	ii
GO:0017144	ii
GO:0034372	ii
GO:0034379	ii
GO:0033555	ii
GO:0061844	ii
GO:0070268	iii
GO:0007586	iii
GO:0006959	iii
GO:0030216	iii
GO:0043588	iii
GO:0008544	iii
GO:0031424	iii
GO:0072376	iii
GO:0009913	iii
GO:0006956	iii
GO:0006958	iii
GO:0002455	iii
GO:0002920	iii
GO:0002526	iii
GO:0030449	iii
GO:2000257	iii
GO:0018149	iii
GO:0070613	iii
GO:1903317	iii
GO:0016064	iii
GO:0019724	iii
GO:0002673	iii
GO:0010466	iii
GO:0050900	iii
GO:0002449	iii
GO:0002377	iii
GO:0016485	iii
GO:0006898	iii
GO:0010951	iii
GO:0002431	iii
GO:0002433	iii
GO:0038096	iii
GO:0038094	iii
GO:0045861	iii
GO:0051604	iii
GO:0002460	iii
GO:0002440	iii
GO:0050892	iii
GO:0006909	iii
GO:0051346	iii
GO:0050727	iii
GO:0052547	iii
GO:0038095	iii
GO:0052548	iii
GO:0002697	iii
GO:0006936	iii
GO:0006641	iii
GO:0006910	iii
GO:0003012	iii
GO:0022600	iii
GO:0042742	iii
GO:0016042	iii
GO:0015850	iii
GO:0006869	iii
GO:0042157	iii
GO:0050891	iii
GO:0030104	iii
GO:0010876	iii
GO:0008643	iii
GO:0034219	iii
GO:0019433	iii
GO:0006721	iii
GO:0006720	iii
GO:0006814	iii
GO:0042158	iii
GO:0046461	iii
GO:0046464	iii
GO:0034378	iii
GO:0035428	iii
GO:1904659	iii
GO:1905950	iii
GO:0042493	iii
GO:0048871	iii
GO:0008217	iii
GO:0019731	iii
GO:0017144	iii
GO:0050832	iii
GO:1904478	iii
GO:0034370	iii
GO:1900004	iii
GO:1902572	iii
GO:0044241	iii
GO:0019730	iii
GO:0006775	iii
GO:0001523	iii
GO:0016101	iii
GO:0007584	iii
GO:0009620	iii
GO:0030299	iii
GO:0098856	iii
GO:1900003	iii
GO:1902571	iii
GO:0006501	iii
GO:0018410	iii
GO:0006821	iii
GO:0031667	iii
GO:0010522	iii
GO:0010817	iii
GO:0007588	iii
GO:0009991	iii
GO:0034372	iii
GO:1902476	iii
GO:0070268	iv
GO:0030216	iv
GO:0043588	iv
GO:0006936	iv
GO:0031424	iv
GO:0007586	iv
GO:0008544	iv
GO:0003012	iv
GO:0009913	iv
GO:0018149	iv
GO:0007517	iv
GO:0043270	iv
GO:0002526	iv
GO:0002920	iv
GO:0006959	iv
GO:0060047	iv
GO:0008016	iv
GO:0003015	iv
GO:0030239	iv
GO:1903522	iv
GO:1904064	iv
GO:0030449	iv
GO:2000257	iv
GO:0006937	iv
GO:0070613	iv
GO:1903317	iv
GO:0034767	iv
GO:0006956	iv
GO:0034764	iv
GO:0002673	iv
GO:0006939	iv
GO:0051146	iv
GO:0006898	iv
GO:0072376	iv
GO:0042692	iv
GO:0070252	iv
GO:1903779	iv
GO:0006941	iv
GO:0060537	iv
GO:0090257	iv
GO:0006958	iv
GO:0002455	iv
GO:0007612	iv
GO:0035637	iv
GO:0010959	iv
GO:0014706	iv
GO:0055002	iv
GO:0031032	iv
GO:2000021	iv
GO:0006641	iv
GO:0055001	iv
GO:0002377	iv
GO:0030048	iv
GO:0061337	iv
GO:0010927	iv
GO:0051480	iv
GO:0072507	iv
GO:0050900	iv
GO:0002027	iv
GO:0055074	iv
GO:0019932	iv
GO:0072503	iv
GO:1904062	iv
GO:0006874	iv
GO:0002440	iv
GO:0043266	iv
GO:0006813	iv
GO:0007204	iv
GO:0023061	iv
GO:0050804	iv
GO:0016064	iv
GO:0019724	iv
GO:0060048	iv
GO:0042391	iv
GO:0034765	iv
GO:0001505	iv
GO:0034762	iv
GO:0006816	iv
GO:0010466	iv
GO:0001508	iv
GO:0006836	iv
GO:1901379	iv
GO:0006639	iv
GO:0006638	iv
GO:0050890	iv
GO:0006814	iv
GO:0050892	iv
GO:0051924	iv
GO:0006940	iv
GO:0016485	iv
GO:0061436	iv
GO:0033561	iv
GO:0007611	iv
GO:0051604	iv
GO:0016042	iv
GO:0060314	iv
GO:0007519	iv
GO:0032845	iv
GO:0007218	iv
GO:0050891	iv
GO:0030104	iv
GO:0043268	iv
GO:0022600	iv
GO:1903169	iv
GO:0050727	iv
GO:0007626	iv
GO:0060538	iv
GO:0034219	iv
GO:0045214	iv
GO:0071772	iv
GO:0071773	iv
GO:0046879	iv
GO:0051588	iv
GO:0055067	iv
GO:0035428	iv
GO:1904659	iv
GO:1905950	iv
GO:0034377	iv
GO:0065005	iv
GO:0019433	iv
GO:0033344	iv
GO:0007188	iv
GO:0009914	iv
GO:0060402	iv
GO:0060401	iv
GO:0010522	iv
GO:0051209	iv
GO:0051283	iv
GO:0051282	iv
GO:0051208	iv
GO:0097553	iv
GO:0051279	iv
GO:0015749	iv
GO:0034378	iv
GO:0030049	iv
GO:0033275	iv
GO:0051705	iv
GO:0046461	iv
GO:0046464	iv
GO:0071827	iv
GO:0071825	iv
GO:0019933	iv
GO:0019935	iv
GO:0030534	iv
GO:0007187	iv
GO:0006721	iv
GO:0006720	iv
GO:0030802	iv
GO:1900371	iv
GO:0030808	iv
GO:0007588	iv
GO:0046883	iv
GO:0008643	iv
GO:0019730	iv
GO:0030804	iv
GO:0030810	iv
GO:1900373	iv
GO:0052652	iv
GO:0009190	iv
GO:0008645	iv
GO:0050832	iv
GO:0046503	iv
GO:0014902	iv
GO:0045762	iv
GO:0098742	iv
GO:0031281	iv
GO:0051349	iv
GO:0045761	iv
GO:0030301	iv
GO:0015918	iv
GO:0031279	iv
GO:0051339	iv
GO:0030799	iv
GO:0048483	iv
GO:0034379	iv
GO:0034370	iv
GO:0048871	iv
GO:0030816	iv
GO:0055075	iv
GO:0048485	iv
GO:0030814	iv
GO:0046058	iv
GO:0030801	iv
GO:0009187	iv
GO:0015850	iv
GO:0015758	iv
GO:0008217	iv
GO:0035176	iv
GO:0051703	iv
GO:0044241	iv
GO:0015696	iv
GO:0003014	iv
GO:0010817	iv
GO:0033555	iv
GO:0045981	iv
GO:1900544	iv
GO:0017144	iv
GO:0007200	iv
GO:0001523	iv
GO:0016101	iv
GO:0006869	iv
GO:0045104	iv
GO:0045103	iv
GO:0055078	iv
GO:0061844	iv

## Sheet: THCA_Stage
ID	Stages
GO:0002446	i
GO:0030198	i
GO:0043062	i
GO:0007492	i
GO:0070371	i
GO:0001706	i
GO:0001501	i
GO:0052548	i
GO:0052547	i
GO:0001503	i
GO:0006027	i
GO:0006026	i
GO:0050808	i
GO:0061564	i
GO:0008544	i
GO:0070372	i
GO:0001704	i
GO:0022604	i
GO:0042475	i
GO:0006959	i
GO:0042476	i
GO:0007611	i
GO:0006024	i
GO:0007369	i
GO:2000147	i
GO:0051272	i
GO:0072378	i
GO:0006023	i
GO:0030574	i
GO:0044243	i
GO:0016358	i
GO:0048705	i
GO:0010951	i
GO:0050890	i
GO:0035115	i
GO:0060996	i
GO:0007409	i
GO:0001525	i
GO:0040017	i
GO:0001655	i
GO:1903510	i
GO:0001822	i
GO:0035136	i
GO:0048168	i
GO:0006959	ii
GO:0031294	ii
GO:0031295	ii
GO:0051249	ii
GO:0002696	ii
GO:0051251	ii
GO:0050867	ii
GO:0022407	ii
GO:0045785	ii
GO:0002449	ii
GO:0002429	ii
GO:0050863	ii
GO:0042110	ii
GO:0050870	ii
GO:1903039	ii
GO:0007159	ii
GO:1903037	ii
GO:0002768	ii
GO:0002460	ii
GO:0022409	ii
GO:0050900	ii
GO:0050851	ii
GO:0002920	ii
GO:0002455	ii
GO:0006956	ii
GO:0072376	ii
GO:0002377	ii
GO:0016064	ii
GO:0002440	ii
GO:0019724	ii
GO:0050853	ii
GO:0006958	ii
GO:0002521	ii
GO:0030098	ii
GO:0008037	ii
GO:0046651	ii
GO:0032943	ii
GO:0042113	ii
GO:0002697	ii
GO:0070661	ii
GO:0050670	ii
GO:0032944	ii
GO:0002673	ii
GO:0030449	ii
GO:2000257	ii
GO:0050854	ii
GO:0070663	ii
GO:0042129	ii
GO:0002683	ii
GO:0050857	ii
GO:0031343	ii
GO:0050727	ii
GO:0030217	ii
GO:0045058	ii
GO:0050864	ii
GO:0031341	ii
GO:0001909	ii
GO:0002706	ii
GO:0050671	ii
GO:0032609	ii
GO:0032946	ii
GO:0001906	ii
GO:0050871	ii
GO:0001912	ii
GO:0042098	ii
GO:0070665	ii
GO:0001910	ii
GO:0050852	ii
GO:0002708	ii
GO:0042102	ii
GO:0006909	ii
GO:0032655	ii
GO:0006874	ii
GO:0032615	ii
GO:0002705	ii
GO:0060326	ii
GO:0002703	ii
GO:0046632	ii
GO:0042100	ii
GO:0046631	ii
GO:0006911	ii
GO:0002699	ii
GO:0051480	ii
GO:0032649	ii
GO:0055074	ii
GO:0072503	ii
GO:0033077	ii
GO:0042742	ii
GO:0045954	ii
GO:0002717	ii
GO:0042269	ii
GO:0002715	ii
GO:0006910	ii
GO:0070613	ii
GO:1903317	ii
GO:0002526	ii
GO:0032735	ii
GO:0050856	ii
GO:0072507	ii
GO:0030595	ii
GO:0050862	ii
GO:0048535	ii
GO:0042267	ii
GO:0002228	ii
GO:0043383	ii
GO:0045061	ii
GO:0030049	ii
GO:0033275	ii
GO:0002688	ii
GO:0032496	ii
GO:0002237	ii
GO:0050866	ii
GO:0050920	ii
GO:0042107	ii
GO:0050663	ii
GO:0032633	ii
GO:0072676	ii
GO:0070252	ii
GO:0050850	ii
GO:0045060	ii
GO:0051897	ii
GO:0003012	ii
GO:0002791	ii
GO:0050708	ii
GO:0002685	ii
GO:0016485	ii
GO:0006936	ii
GO:0051250	ii
GO:0051604	ii
GO:0006898	ii
GO:0045834	ii
GO:0050921	ii
GO:2000021	ii
GO:0097028	ii
GO:0002923	ii
GO:0051260	ii
GO:0015669	ii
GO:0001906	iii
GO:0050900	iii
GO:0006959	iii
GO:0030198	iii
GO:0043062	iii
GO:0060326	iii
GO:0071356	iii
GO:0034612	iii
GO:0030595	iii
GO:0070371	iii
GO:0060538	iii
GO:0015701	iii
GO:0030574	iii
GO:0044243	iii
GO:0030199	iii
GO:0042391	iii
GO:0052548	iii
GO:2000147	iii
GO:0051272	iii
GO:0031640	iii
GO:0044364	iii
GO:0051216	iii
GO:0032963	iii
GO:0044259	iii
GO:0052547	iii
GO:0001501	iii
GO:0070372	iii
GO:0007492	iii
GO:0040017	iii
GO:0001706	iii
GO:0015669	iii
GO:0030900	iii
GO:0044236	iii
GO:0061448	iii
GO:0030335	iii
GO:0061564	iii
GO:0097529	iii
GO:0070268	iii
GO:0048168	iii
GO:0001704	iii
GO:0022037	iii
GO:0050808	iii
GO:0007611	iii
GO:0015698	iii
GO:0007187	iii
GO:0045785	iii
GO:0007612	iii
GO:0007369	iii
GO:0008544	iii
GO:0030593	iii
GO:1990266	iii
GO:0071621	iii
GO:0030902	iii
GO:0030216	iii
GO:0097530	iii
GO:0001503	iii
GO:0032844	iii
GO:0006959	iv
GO:0002455	iv
GO:0050900	iv
GO:0006956	iv
GO:0006958	iv
GO:0072376	iv
GO:0016485	iv
GO:0002920	iv
GO:0002526	iv
GO:0030449	iv
GO:2000257	iv
GO:0030049	iv
GO:0033275	iv
GO:0016064	iv
GO:0051604	iv
GO:0006898	iv
GO:0019724	iv
GO:0006936	iv
GO:0070613	iv
GO:1903317	iv
GO:0002673	iv
GO:0002449	iv
GO:0002460	iv
GO:0050853	iv
GO:0050727	iv
GO:0002768	iv
GO:0006909	iv
GO:0002429	iv
GO:0030239	iv
GO:0001101	iv
GO:0003012	iv
GO:0030199	iv
GO:0060537	iv
GO:0007517	iv
GO:0014706	iv
GO:0030198	iv
GO:0043062	iv
GO:0070252	iv
GO:0007204	iv
GO:0060326	iv
GO:0051480	iv
GO:0030574	iv
GO:0044243	iv
GO:0051146	iv
GO:0070542	iv
GO:0032963	iv
GO:0044259	iv
GO:0030595	iv
GO:0060538	iv
GO:0044236	iv
GO:0008037	iv
GO:0042692	iv
GO:1903532	iv
GO:0006941	iv
GO:0007519	iv
GO:0042391	iv
GO:0051047	iv
GO:0055008	iv
GO:0060415	iv
GO:0007492	iv
GO:0048644	iv
GO:0007611	iv
GO:0055010	iv
GO:0097529	iv
GO:2000147	iv
GO:0051272	iv
GO:0003229	iv
GO:0001706	iv
GO:0032844	iv
GO:0030902	iv
GO:0007612	iv
GO:0071229	iv
GO:0001501	iv
GO:0003231	iv
GO:0040017	iv
GO:0050804	iv
GO:0032102	iv
GO:0003208	iv
GO:0050954	iv
GO:0050890	iv
GO:0048167	iv
GO:0022037	iv
GO:1990266	iv
GO:0061564	iv
GO:0097530	iv
GO:0001704	iv
GO:0071621	iv
GO:0030335	iv
GO:0048168	iv
GO:0051216	iv
GO:0043588	iv
GO:0003205	iv
GO:2000463	iv
GO:0002026	iv
GO:0003206	iv
GO:2000021	iv
GO:0060047	iv
GO:0003015	iv
GO:0097479	iv
GO:0023061	iv
GO:0007596	iv
GO:0007599	iv
GO:0050817	iv
GO:0061448	iv
GO:0090276	iv
GO:0032526	iv
GO:0045785	iv
GO:0060048	iv
GO:0016338	iv
GO:0022617	iv
GO:0001503	iv
GO:0050769	iv
GO:0046717	iv
GO:0046660	iv
GO:0016358	iv
GO:0006937	iv
GO:0098815	iv
GO:0003281	iv
GO:0030072	iv
