# Supplementary material for: Co-expression based cancer staging and application
Source: Sci Rep. 2020 Jun 30;10:10624. doi: 10.1038/s41598-020-67476-7 (PMC7327081; doi:10.1038/s41598-020-67476-7)
Supplement: Supplementary file 6 — Supplementary file6 [file 41598_2020_67476_MOESM6_ESM.xlsx]

## Sheet: BRCA_Stage
Up
ID	Stages(Up)
GO:0006334	i
GO:0006323	i
GO:0031497	i
GO:0034728	i
GO:0006333	i
GO:0071103	i
GO:0006335	i
GO:0034723	i
GO:0065004	i
GO:0006342	i
GO:0000183	i
GO:0071824	i
GO:0045814	i
GO:0000819	i
GO:0051290	i
GO:0007059	i
GO:0098813	i
GO:0000070	i
GO:0140014	i
GO:0045652	i
GO:0060968	i
GO:0060147	i
GO:0060966	i
GO:0045815	i
GO:0051983	i
GO:0060964	i
GO:0007062	i
GO:0000280	i
GO:0030219	i
GO:1902036	i
GO:0048285	i
GO:0051262	i
GO:0060218	i
GO:1901532	i
GO:0032200	i
GO:0010965	i
GO:0033045	i
GO:0051306	i
GO:0002244	i
GO:0051291	i
GO:1905818	i
GO:0051783	i
GO:2000736	i
GO:0007088	i
GO:0033047	i
GO:0051304	i
GO:0030071	i
GO:1902099	i
GO:0007091	i
GO:0044784	i
GO:1902850	i
GO:0033046	i
GO:0051985	i
GO:0016458	i
GO:0051321	i
GO:0045637	i
GO:0040029	i
GO:0007052	i
GO:0140013	i
GO:0000075	i
GO:1901989	i
GO:0090307	i
GO:1903046	i
GO:0051303	i
GO:0050000	i
GO:0033044	i
GO:0007051	i
GO:1901987	i
GO:0051225	i
GO:0007093	i
GO:0051310	i
GO:0035194	i
GO:0000226	i
GO:0016441	i
GO:0090068	i
GO:0061640	i
GO:1901990	i
GO:0000910	i
GO:0035195	i
GO:0000281	i
GO:0031047	i
GO:0034502	i
GO:0031577	i
GO:0071459	i
GO:2000816	i
GO:1905819	i
GO:0033048	i
GO:0045839	i
GO:0007094	i
GO:0071173	i
GO:0071174	i
GO:0045841	i
GO:1902100	i
GO:0048863	i
GO:0051784	i
GO:1901992	i
GO:0034501	i
GO:0008608	i
GO:0030099	i
GO:0045653	i
GO:0006303	i
GO:0000726	i
GO:0045132	i
GO:1904837	i
GO:0016233	i
GO:0034508	i
GO:0006336	i
GO:0034724	i
GO:0034080	i
GO:0061641	i
GO:0031055	i
GO:0043486	i
GO:0043044	i
GO:0045638	i
GO:0000723	i
GO:1903707	i
GO:0006338	i
GO:0038111	i
GO:0098760	i
GO:0098761	i
GO:0006323	ii
GO:0006334	ii
GO:0031497	ii
GO:0071103	ii
GO:0007059	ii
GO:0000819	ii
GO:0006333	ii
GO:0034728	ii
GO:0098813	ii
GO:0006335	ii
GO:0034723	ii
GO:0065004	ii
GO:0000070	ii
GO:0000280	ii
GO:0140014	ii
GO:0000183	ii
GO:0071824	ii
GO:0006342	ii
GO:0048285	ii
GO:0045814	ii
GO:0051290	ii
GO:0018149	ii
GO:0051983	ii
GO:0051321	ii
GO:0031424	ii
GO:0007062	ii
GO:0034508	ii
GO:0010965	ii
GO:0045815	ii
GO:0051306	ii
GO:0140013	ii
GO:1903046	ii
GO:1905818	ii
GO:0033045	ii
GO:0060968	ii
GO:0030216	ii
GO:0008544	ii
GO:0030071	ii
GO:0009913	ii
GO:0051304	ii
GO:0033047	ii
GO:1902099	ii
GO:0045652	ii
GO:0007088	ii
GO:0007091	ii
GO:0044784	ii
GO:0051783	ii
GO:0045132	ii
GO:0060147	ii
GO:0060966	ii
GO:0032200	ii
GO:0043588	ii
GO:0033046	ii
GO:0051985	ii
GO:0060964	ii
GO:2000816	ii
GO:1905819	ii
GO:0051784	ii
GO:0051291	ii
GO:0051303	ii
GO:0030219	ii
GO:1902850	ii
GO:0050000	ii
GO:0033048	ii
GO:0008608	ii
GO:0000075	ii
GO:0051310	ii
GO:0007093	ii
GO:0071459	ii
GO:0031577	ii
GO:0007052	ii
GO:1902036	ii
GO:0034502	ii
GO:0060218	ii
GO:0002244	ii
GO:0051262	ii
GO:0007094	ii
GO:0071173	ii
GO:0071174	ii
GO:2000736	ii
GO:0034501	ii
GO:0045841	ii
GO:0045839	ii
GO:1902100	ii
GO:1901532	ii
GO:0007080	ii
GO:0006302	ii
GO:0033044	ii
GO:0007051	ii
GO:0090068	ii
GO:0090307	ii
GO:0030261	ii
GO:0051225	ii
GO:0072376	ii
GO:2001251	ii
GO:0000910	ii
GO:0031570	ii
GO:1901989	ii
GO:0044774	ii
GO:0045787	ii
GO:1901990	ii
GO:1901987	ii
GO:0006260	ii
GO:0071158	ii
GO:0071156	ii
GO:0007127	ii
GO:0045637	ii
GO:0006336	ii
GO:0034724	ii
GO:0030193	ii
GO:1900046	ii
GO:0050818	ii
GO:0006270	ii
GO:0007597	ii
GO:0072378	ii
GO:0034080	ii
GO:0061641	ii
GO:0031055	ii
GO:0043486	ii
GO:0043044	ii
GO:0048863	ii
GO:0045653	ii
GO:0000723	ii
GO:1904837	ii
GO:0030195	ii
GO:1900047	ii
GO:0050819	ii
GO:0061045	ii
GO:0050817	ii
GO:0051383	ii
GO:0000083	ii
GO:0006303	ii
GO:1903035	ii
GO:0051918	ii
GO:0006338	ii
GO:0016233	ii
GO:0045638	ii
GO:0051917	ii
GO:0042730	ii
GO:0070192	ii
GO:0000022	ii
GO:0030194	ii
GO:1900048	ii
GO:0050820	ii
GO:0051315	ii
GO:1903707	ii
GO:2000241	ii
GO:0035404	ii
GO:0045143	ii
GO:0060249	ii
GO:0051238	ii
GO:0051346	ii
GO:2000352	ii
GO:0038111	ii
GO:0098760	ii
GO:0098761	ii
GO:0048477	ii
GO:0031640	ii
GO:0044364	ii
GO:1904036	ii
GO:0045861	ii
GO:0051782	ii
GO:0070268	ii
GO:0001906	ii
GO:0006959	ii
GO:0019731	ii
GO:0000819	iii
GO:0007059	iii
GO:0098813	iii
GO:0000280	iii
GO:0000070	iii
GO:0006323	iii
GO:0140014	iii
GO:0048285	iii
GO:0071103	iii
GO:0007062	iii
GO:0051983	iii
GO:0065004	iii
GO:0051321	iii
GO:0071824	iii
GO:0010965	iii
GO:1902850	iii
GO:0140013	iii
GO:0051306	iii
GO:0033045	iii
GO:0030071	iii
GO:1905818	iii
GO:1902099	iii
GO:0007091	iii
GO:0051304	iii
GO:0051783	iii
GO:0044784	iii
GO:0007088	iii
GO:1903046	iii
GO:0000075	iii
GO:0031424	iii
GO:0033047	iii
GO:0007052	iii
GO:0007093	iii
GO:0045132	iii
GO:0008608	iii
GO:0030216	iii
GO:0007051	iii
GO:0090068	iii
GO:0051303	iii
GO:0050000	iii
GO:0051310	iii
GO:0007127	iii
GO:0071459	iii
GO:0009913	iii
GO:0033046	iii
GO:0018149	iii
GO:0051985	iii
GO:0000910	iii
GO:0031577	iii
GO:2000816	iii
GO:0034501	iii
GO:0030261	iii
GO:1905819	iii
GO:0000226	iii
GO:0033048	iii
GO:0051784	iii
GO:0090307	iii
GO:0045787	iii
GO:0051225	iii
GO:0007094	iii
GO:0071173	iii
GO:0071174	iii
GO:0045841	iii
GO:0034502	iii
GO:0071158	iii
GO:0033044	iii
GO:0007080	iii
GO:1902100	iii
GO:1901987	iii
GO:0031570	iii
GO:1901990	iii
GO:0072395	iii
GO:0061640	iii
GO:0044774	iii
GO:0000281	iii
GO:0045839	iii
GO:0071156	iii
GO:0006977	iii
GO:0072431	iii
GO:1902400	iii
GO:0072413	iii
GO:1902402	iii
GO:1902403	iii
GO:0031145	iii
GO:0072401	iii
GO:0072422	iii
GO:0006260	iii
GO:0044839	iii
GO:0010948	iii
GO:1901989	iii
GO:0031571	iii
GO:0044819	iii
GO:0044783	iii
GO:0000086	iii
GO:0044773	iii
GO:0006302	iii
GO:0043588	iii
GO:0070268	iii
GO:0008544	iii
GO:0006334	iii
GO:0034728	iii
GO:0031497	iii
GO:0006333	iii
GO:0000022	iii
GO:0051231	iii
GO:0007076	iii
GO:0006342	iii
GO:0045814	iii
GO:0034508	iii
GO:2000241	iii
GO:0070192	iii
GO:0032200	iii
GO:0035404	iii
GO:0006336	iii
GO:0034724	iii
GO:0000183	iii
GO:0051290	iii
GO:0045652	iii
GO:0045815	iii
GO:0030219	iii
GO:1902036	iii
GO:0060218	iii
GO:1901532	iii
GO:0060968	iii
GO:0006335	iii
GO:0034723	iii
GO:0051291	iii
GO:0060964	iii
GO:0060147	iii
GO:0060966	iii
GO:2000736	iii
GO:0002244	iii
GO:0051262	iii
GO:0001706	iii
GO:0061351	iii
GO:0034080	iii
GO:0061641	iii
GO:0031055	iii
GO:0043486	iii
GO:0043044	iii
GO:0007492	iii
GO:0048863	iii
GO:0045143	iii
GO:0000819	iv
GO:0007059	iv
GO:0098813	iv
GO:0000070	iv
GO:0140014	iv
GO:0000280	iv
GO:0048285	iv
GO:0051983	iv
GO:0071103	iv
GO:0006323	iv
GO:0007062	iv
GO:0010965	iv
GO:0051306	iv
GO:0033045	iv
GO:1905818	iv
GO:0007091	iv
GO:0044784	iv
GO:0033047	iv
GO:0030071	iv
GO:1902099	iv
GO:0051783	iv
GO:0051304	iv
GO:0007088	iv
GO:1902850	iv
GO:0000075	iv
GO:0051321	iv
GO:0007093	iv
GO:0033046	iv
GO:0000226	iv
GO:0051985	iv
GO:0007052	iv
GO:0090068	iv
GO:0031577	iv
GO:2000816	iv
GO:1905819	iv
GO:0071459	iv
GO:0045787	iv
GO:0033048	iv
GO:0007094	iv
GO:0071173	iv
GO:0071174	iv
GO:0007051	iv
GO:0008608	iv
GO:0045841	iv
GO:1901987	iv
GO:1902100	iv
GO:1901990	iv
GO:0140013	iv
GO:0051310	iv
GO:0045839	iv
GO:0051784	iv
GO:1903046	iv
GO:0034502	iv
GO:0051303	iv
GO:0050000	iv
GO:0010948	iv
GO:0033044	iv
GO:0030261	iv
GO:0000910	iv
GO:1901989	iv
GO:1901991	iv
GO:0045132	iv
GO:0031570	iv
GO:0045930	iv
GO:1901988	iv
GO:0007080	iv
GO:0044839	iv
GO:0031145	iv
GO:0051225	iv
GO:1901992	iv
GO:0044843	iv
GO:0000086	iv
GO:0090307	iv
GO:0000082	iv
GO:0044774	iv
GO:0045931	iv
GO:0006260	iv
GO:0061640	iv
GO:0000281	iv
GO:2001251	iv
GO:0045840	iv
GO:1902749	iv
GO:0051656	iv
GO:1904668	iv
GO:0000077	iv
GO:0006302	iv
GO:0051443	iv
GO:0034501	iv
GO:0007050	iv
GO:0006977	iv
GO:0072431	iv
GO:1902400	iv
GO:0072413	iv
GO:1902402	iv
GO:1902403	iv
GO:0072401	iv
GO:0072422	iv
GO:0031571	iv
GO:0044819	iv
GO:0044783	iv
GO:0071156	iv
GO:0007127	iv
GO:0072395	iv
GO:0044773	iv
GO:0065004	iv
GO:0071824	iv
GO:0051653	iv
GO:0071158	iv
GO:0000079	iv
GO:0016572	iv
GO:0006270	iv
GO:0051984	iv
GO:0000083	iv
GO:0007076	iv
GO:0006334	iv
GO:0034728	iv
GO:0006333	iv
GO:0031497	iv
GO:0051383	iv
GO:0006342	iv
GO:0045814	iv
GO:0051782	iv
GO:0032200	iv
GO:0019730	iv
GO:0061844	iv
GO:0035404	iv
GO:0050804	iv
GO:0042742	iv
GO:1902969	iv
GO:0000076	iv
GO:0035987	iv
GO:0001578	iv
GO:0007411	iv
GO:0097485	iv
GO:0001706	iv

## Sheet: COAD_Stage
ID	Stages
GO:0006334	i
GO:0051290	i
GO:0006335	i
GO:0034723	i
GO:0000183	i
GO:0045652	i
GO:0045815	i
GO:0030219	i
GO:0045653	i
GO:0060964	i
GO:0060147	i
GO:0060966	i
GO:0051291	i
GO:0006335	ii
GO:0034723	ii
GO:0051290	ii
GO:0000183	ii
GO:0006334	ii
GO:0031497	ii
GO:0034728	ii
GO:0006342	ii
GO:0045652	ii
GO:0030219	ii
GO:0006333	ii
GO:0006323	ii
GO:0045815	ii
GO:0045814	ii
GO:0060964	ii
GO:0060147	ii
GO:0060966	ii
GO:0060968	ii
GO:2000736	ii
GO:0045653	ii
GO:0051291	ii
GO:0016233	ii
GO:0045637	ii
GO:0018149	ii
GO:0045638	ii
GO:0006334	iii
GO:0031497	iii
GO:0006335	iii
GO:0034723	iii
GO:0034728	iii
GO:0051290	iii
GO:0000183	iii
GO:0006333	iii
GO:0006323	iii
GO:0006342	iii
GO:0045652	iii
GO:0030219	iii
GO:0045815	iii
GO:0065004	iii
GO:0045814	iii
GO:0071103	iii
GO:0071824	iii
GO:0060964	iii
GO:0060147	iii
GO:0060966	iii
GO:0060968	iii
GO:2000736	iii
GO:0045653	iii
GO:0051291	iii
GO:0045638	iii
GO:0018149	iv
GO:0030198	iv
GO:0043062	iv
GO:0030574	iv
GO:0044243	iv
GO:0032963	iv
GO:0044259	iv
GO:0070268	iv
GO:0090023	iv
GO:0090022	iv
GO:0044236	iv
GO:0071624	iv
GO:1902624	iv
GO:1902622	iv
GO:0060349	iv
GO:0031424	iv
GO:0071622	iv
GO:0051216	iv
GO:0061448	iv
GO:0002690	iv
GO:0002688	iv
GO:0001706	iv
GO:0002687	iv
GO:0001503	iv
GO:0014706	iv
GO:0009953	iv
GO:0035270	iv
GO:0060537	iv
GO:0030216	iv
GO:0048562	iv
GO:0003002	iv
GO:0009913	iv
GO:0007389	iv
GO:0007492	iv
GO:0001704	iv
GO:0001764	iv
GO:0048705	iv
GO:0007517	iv

## Sheet: HNSC_Stage
ID	Stages
GO:0030198	i
GO:0043062	i
GO:0030574	i
GO:0044243	i
GO:0032963	i
GO:0044259	i
GO:0044236	i
GO:0006958	i
GO:0002455	i
GO:0030199	i
GO:0006956	i
GO:0072376	i
GO:0006959	i
GO:0006910	i
GO:0016064	i
GO:0019724	i
GO:0050853	i
GO:0002460	i
GO:0002920	i
GO:0006911	i
GO:0008037	i
GO:0099024	i
GO:0070613	i
GO:1903317	i
GO:0010324	i
GO:0002449	i
GO:0006909	i
GO:0002433	i
GO:0038096	i
GO:0030449	i
GO:2000257	i
GO:0042742	i
GO:0038094	i
GO:0002431	i
GO:0060337	i
GO:0071357	i
GO:0050871	i
GO:0034340	i
GO:0050864	i
GO:0002429	i
GO:0002673	i
GO:0002768	i
GO:0042113	i
GO:0002526	i
GO:0051607	i
GO:0038093	i
GO:0050851	i
GO:0002696	i
GO:0002697	i
GO:0009615	i
GO:0050727	i
GO:0016485	i
GO:0051604	i
GO:0001501	i
GO:0061448	i
GO:0051216	i
GO:0022617	i
GO:0045071	i
GO:1903901	i
GO:0045069	i
GO:0048525	i
GO:0050900	i
GO:0035987	i
GO:0043901	i
GO:0001706	i
GO:0001503	i
GO:0007492	i
GO:0001704	i
GO:0007369	i
GO:0002062	i
GO:0043900	i
GO:0001958	i
GO:0036075	i
GO:0048706	i
GO:0030574	ii
GO:0030198	ii
GO:0043062	ii
GO:0044243	ii
GO:0032963	ii
GO:0044259	ii
GO:0044236	ii
GO:0030199	ii
GO:0061448	ii
GO:0032103	ii
GO:0001501	ii
GO:0001503	ii
GO:0035987	ii
GO:0051216	ii
GO:0043949	ii
GO:0001706	ii
GO:0010818	ii
GO:0051281	ii
GO:0072678	ii
GO:0007492	ii
GO:0001704	ii
GO:0007369	ii
GO:0022617	ii
GO:0008406	ii
GO:0045137	ii
GO:0090596	ii
GO:0007548	ii
GO:0048705	ii
GO:0007292	ii
GO:0048608	ii
GO:0061458	ii
GO:0060065	ii
GO:0034505	ii
GO:0001958	ii
GO:0036075	ii
GO:0008584	ii
GO:0046546	ii
GO:0007281	ii
GO:0022412	ii
GO:0030198	iii
GO:0043062	iii
GO:0030574	iii
GO:0032963	iii
GO:0044259	iii
GO:0030199	iii
GO:0044243	iii
GO:0044236	iii
GO:0001501	iii
GO:0061448	iii
GO:0051216	iii
GO:0001503	iii
GO:0035987	iii
GO:0001706	iii
GO:0001704	iii
GO:0048705	iii
GO:0007492	iii
GO:0007369	iii
GO:0035107	iii
GO:0035108	iii
GO:0048736	iii
GO:0060173	iii
GO:0022617	iii
GO:0021510	iii
GO:0048706	iii
GO:0021521	iii
GO:0060573	iii
GO:0030574	iv
GO:0030198	iv
GO:0043062	iv
GO:0044243	iv
GO:0001501	iv
GO:0032963	iv
GO:0044259	iv
GO:0044236	iv
GO:0030199	iv
GO:0035987	iv
GO:0061448	iv
GO:0001503	iv
GO:0001706	iv
GO:0001704	iv
GO:0007369	iv
GO:0007492	iv
GO:0051216	iv
GO:0090596	iv
GO:0002062	iv
GO:0022617	iv
GO:0007601	iv
GO:0050953	iv
GO:0048705	iv
GO:0007178	iv
GO:0001654	iv
GO:0034505	iv
GO:0048568	iv

## Sheet: KIRC_Stage
ID	Stages
GO:0034372	i
GO:0010896	i
GO:0034370	i
GO:0046461	i
GO:0046464	i
GO:0050994	i
GO:0033700	i
GO:0043691	i
GO:0034377	i
GO:0065005	i
GO:0033344	i
GO:0070231	i
GO:0034378	i
GO:0034367	i
GO:0034368	i
GO:0034369	i
GO:0019433	i
GO:0090207	i
GO:0071827	i
GO:0071825	i
GO:0008202	i
GO:0016042	i
GO:0002449	ii
GO:0006958	ii
GO:0002455	ii
GO:0019724	ii
GO:0016064	ii
GO:0002460	ii
GO:0006956	ii
GO:0006959	ii
GO:0072376	ii
GO:0002768	ii
GO:0006909	ii
GO:0002429	ii
GO:0051249	ii
GO:0006910	ii
GO:0050900	ii
GO:0051251	ii
GO:0002696	ii
GO:0050867	ii
GO:0006911	ii
GO:0099024	ii
GO:0050864	ii
GO:0002920	ii
GO:0050853	ii
GO:0010324	ii
GO:0030449	ii
GO:2000257	ii
GO:0002697	ii
GO:0008037	ii
GO:0002526	ii
GO:0050871	ii
GO:0042742	ii
GO:0038094	ii
GO:0002431	ii
GO:0002433	ii
GO:0038096	ii
GO:0002673	ii
GO:1903317	ii
GO:0042113	ii
GO:0070613	ii
GO:0050851	ii
GO:0042110	ii
GO:0006898	ii
GO:0050727	ii
GO:0050863	ii
GO:0007159	ii
GO:0038093	ii
GO:1903037	ii
GO:0038095	ii
GO:0002377	ii
GO:1903039	ii
GO:0050870	ii
GO:0016485	ii
GO:0022407	ii
GO:0022409	ii
GO:0002440	ii
GO:0051604	ii
GO:0030217	ii
GO:0030098	ii
GO:0045088	ii
GO:0045785	ii
GO:0002708	ii
GO:0002705	ii
GO:0002706	ii
GO:0002521	ii
GO:0002703	ii
GO:0031343	ii
GO:0002699	ii
GO:0045089	ii
GO:0046631	ii
GO:0032609	ii
GO:0002286	ii
GO:0032496	ii
GO:0002237	ii
GO:0046634	ii
GO:0031349	ii
GO:0031341	ii
GO:0050670	ii
GO:0032944	ii
GO:0070663	ii
GO:0002285	ii
GO:0042129	ii
GO:0072676	ii
GO:0042102	ii
GO:0002228	ii
GO:0032649	ii
GO:0045954	ii
GO:0002717	ii
GO:0046651	ii
GO:0032943	ii
GO:0070661	ii
GO:0032729	ii
GO:0031295	ii
GO:0031294	ii
GO:0070098	ii
GO:0001912	ii
GO:0071887	ii
GO:0002683	ii
GO:0019932	ii
GO:0050671	ii
GO:0032946	ii
GO:0070665	ii
GO:0048247	ii
GO:0002822	ii
GO:0002715	ii
GO:0072678	ii
GO:0019722	ii
GO:0042098	ii
GO:0046635	ii
GO:0001819	ii
GO:0042267	ii
GO:0001909	ii
GO:0001906	ii
GO:1902105	ii
GO:0070227	ii
GO:0045619	ii
GO:0030595	ii
GO:0001910	ii
GO:0002824	ii
GO:0002821	ii
GO:0010818	ii
GO:0050850	ii
GO:0043368	ii
GO:0060326	ii
GO:0042269	ii
GO:0045580	ii
GO:2000106	ii
GO:0030101	ii
GO:0046632	ii
GO:0034341	ii
GO:0043367	ii
GO:0019835	ii
GO:0070228	ii
GO:0071222	ii
GO:0071219	ii
GO:0071216	ii
GO:0002449	iii
GO:0002460	iii
GO:0019724	iii
GO:0016064	iii
GO:0002455	iii
GO:0006959	iii
GO:0006958	iii
GO:0051249	iii
GO:0050900	iii
GO:0002696	iii
GO:0002526	iii
GO:0072376	iii
GO:0006956	iii
GO:0006909	iii
GO:0002697	iii
GO:0050867	iii
GO:0051251	iii
GO:0002768	iii
GO:0042110	iii
GO:0007159	iii
GO:0050863	iii
GO:0002429	iii
GO:1903037	iii
GO:0002920	iii
GO:0050870	iii
GO:0030449	iii
GO:0022409	iii
GO:2000257	iii
GO:0022407	iii
GO:1903039	iii
GO:1903317	iii
GO:0002673	iii
GO:0070613	iii
GO:0045785	iii
GO:0038094	iii
GO:0002431	iii
GO:0016485	iii
GO:0002433	iii
GO:0038096	iii
GO:0002703	iii
GO:0050864	iii
GO:0050727	iii
GO:0030595	iii
GO:0006898	iii
GO:0070098	iii
GO:0051604	iii
GO:0006911	iii
GO:0099024	iii
GO:0050871	iii
GO:0042098	iii
GO:0010324	iii
GO:0001906	iii
GO:0050670	iii
GO:0032944	iii
GO:0050851	iii
GO:0072676	iii
GO:0070663	iii
GO:0046651	iii
GO:0001909	iii
GO:0032943	iii
GO:0060326	iii
GO:0042129	iii
GO:0002706	iii
GO:0006910	iii
GO:0002521	iii
GO:0042113	iii
GO:0070661	iii
GO:0002699	iii
GO:0002228	iii
GO:1902105	iii
GO:0045619	iii
GO:0038093	iii
GO:0032496	iii
GO:0002237	iii
GO:0030217	iii
GO:0002705	iii
GO:0046631	iii
GO:0042102	iii
GO:0050671	iii
GO:0032946	iii
GO:0045580	iii
GO:0030098	iii
GO:0031341	iii
GO:0070665	iii
GO:0002708	iii
GO:0001819	iii
GO:0008037	iii
GO:0002285	iii
GO:0038095	iii
GO:0032609	iii
GO:0002683	iii
GO:0032649	iii
GO:0031343	iii
GO:0045088	iii
GO:0046632	iii
GO:0031349	iii
GO:0002286	iii
GO:0032103	iii
GO:0001912	iii
GO:0045089	iii
GO:1903706	iii
GO:0002446	iii
GO:0019932	iii
GO:0019722	iii
GO:0042119	iii
GO:0050852	iii
GO:0043312	iii
GO:0002283	iii
GO:0032729	iii
GO:0045058	iii
GO:0043368	iii
GO:0071887	iii
GO:0071346	iii
GO:0031295	iii
GO:0031294	iii
GO:0046635	iii
GO:0035710	iii
GO:0050853	iii
GO:0002440	iii
GO:0072678	iii
GO:0001910	iii
GO:0034341	iii
GO:0002292	iii
GO:0046634	iii
GO:0051209	iii
GO:0051283	iii
GO:0051282	iii
GO:0051208	iii
GO:0097553	iii
GO:0048872	iii
GO:0042267	iii
GO:0045582	iii
GO:0045621	iii
GO:0060402	iii
GO:0002287	iii
GO:0002293	iii
GO:0071356	iii
GO:0010818	iii
GO:0002532	iii
GO:0002700	iii
GO:0048247	iii
GO:0050663	iii
GO:0071219	iii
GO:0071216	iii
GO:0032653	iii
GO:0032613	iii
GO:0043367	iii
GO:1902107	iii
GO:1903708	iii
GO:0006816	iii
GO:0072507	iii
GO:0002715	iii
GO:0042742	iii
GO:0030101	iii
GO:0006874	iii
GO:0055074	iii
GO:0007204	iii
GO:0001818	iii
GO:0006968	iii
GO:0045954	iii
GO:0002717	iii
GO:0051235	iii
GO:0002456	iii
GO:0002824	iii
GO:0002821	iii
GO:0050850	iii
GO:0070227	iii
GO:0050707	iii
GO:0072503	iii
GO:0070838	iii
GO:0002822	iii
GO:0051250	iii
GO:0002819	iii
GO:0071222	iii
GO:0051480	iii
GO:0002294	iii
GO:0002695	iii
GO:2000106	iii
GO:0002367	iii
GO:0072511	iii
GO:0002573	iii
GO:0006925	iii
GO:0050866	iii
GO:0030593	iii
GO:0032733	iii
GO:2000516	iii
GO:0070231	iii
GO:0007157	iii
GO:0002377	iii
GO:0001776	iii
GO:0071621	iii
GO:0051924	iii
GO:0050715	iii
GO:0042269	iii
GO:0019835	iii
GO:0002685	iii
GO:1990266	iii
GO:0050714	iii
GO:0050702	iii
GO:2000514	iii
GO:0050854	iii
GO:0032623	iii
GO:0046641	iii
GO:0046640	iii
GO:0046633	iii
GO:0006953	iii
GO:0002690	iii
GO:0070374	iii
GO:0070228	iii
GO:0035747	iii
GO:0072540	iii
GO:0002295	iii
GO:0036037	iii
GO:0097028	iii
GO:0050701	iii
GO:0002688	iii
GO:0050921	iii
GO:0097530	iii
GO:1901623	iii
GO:0046638	iii
GO:0046637	iii
GO:0032612	iii
GO:0002544	iii
GO:0002507	iii
GO:0002793	iii
GO:2000403	iii
GO:0002687	iii
GO:0097529	iii
GO:0043949	iii
GO:2000352	iii
GO:0048873	iii
GO:0045907	iii
GO:0060627	iii
GO:2000107	iii
GO:0050918	iii
GO:0050920	iii
GO:2000401	iii
GO:0045921	iii
GO:0070232	iii
GO:0002714	iii
GO:0002891	iii
GO:0050856	iii
GO:0043029	iii
GO:0043370	iii
GO:2000351	iii
GO:0043300	iii
GO:0010820	iii
GO:1903532	iii
GO:0051047	iii
GO:0017157	iii
GO:0002886	iii
GO:0002712	iii
GO:0002889	iii
GO:0019229	iii
GO:0030888	iii
GO:0010819	iii
GO:0033028	iii
GO:0002701	iii
GO:0002260	iii
GO:0050868	iii
GO:1903038	iii
GO:2000406	iii
GO:0050718	iii
GO:0032731	iii
GO:0050706	iii
GO:0002449	iv
GO:0051249	iv
GO:0002460	iv
GO:0002455	iv
GO:0006958	iv
GO:0019724	iv
GO:0016064	iv
GO:0002696	iv
GO:0051251	iv
GO:0050867	iv
GO:0006956	iv
GO:0072376	iv
GO:0002697	iv
GO:0006909	iv
GO:0006959	iv
GO:0050900	iv
GO:0002768	iv
GO:0002526	iv
GO:0002429	iv
GO:0050863	iv
GO:0042110	iv
GO:0007159	iv
GO:1903037	iv
GO:1903317	iv
GO:0070613	iv
GO:0050870	iv
GO:0002920	iv
GO:0030449	iv
GO:2000257	iv
GO:0022409	iv
GO:1903039	iv
GO:0002673	iv
GO:0038094	iv
GO:0022407	iv
GO:0002431	iv
GO:0002433	iv
GO:0038096	iv
GO:0006911	iv
GO:0050727	iv
GO:0050864	iv
GO:0099024	iv
GO:0050871	iv
GO:0010324	iv
GO:0006910	iv
GO:0016485	iv
GO:0045785	iv
GO:0050670	iv
GO:0032944	iv
GO:0050853	iv
GO:0042742	iv
GO:0070663	iv
GO:0050851	iv
GO:0042098	iv
GO:0038093	iv
GO:0051604	iv
GO:0046651	iv
GO:0006898	iv
GO:0032943	iv
GO:0042129	iv
GO:0030595	iv
GO:0070661	iv
GO:0042113	iv
GO:0002377	iv
GO:0002440	iv
GO:0042102	iv
GO:0008037	iv
GO:0002703	iv
GO:0050671	iv
GO:0032946	iv
GO:0060326	iv
GO:0038095	iv
GO:0070665	iv
GO:0001819	iv
GO:0002706	iv
GO:0030217	iv
GO:0045619	iv
GO:0072676	iv
GO:0031295	iv
GO:0045580	iv
GO:0031294	iv
GO:0046634	iv
GO:0002699	iv
GO:0046631	iv
GO:0002521	iv
GO:0032496	iv
GO:0001906	iv
GO:0002228	iv
GO:0002237	iv
GO:0001909	iv
GO:1902105	iv
GO:0030098	iv
GO:0070098	iv
GO:0002715	iv
GO:0045582	iv
GO:0031341	iv
GO:0002708	iv
GO:0002705	iv
GO:0001910	iv
GO:0030593	iv
GO:0042269	iv
GO:0042267	iv
GO:0050866	iv
GO:0032649	iv
GO:0032609	iv
GO:0051250	iv
GO:0002695	iv
GO:0045621	iv
GO:0097530	iv
GO:0031343	iv
GO:0046635	iv
GO:0002822	iv
GO:0002819	iv
GO:0045088	iv
GO:0031349	iv
GO:0002683	iv
GO:0001912	iv
GO:0071219	iv
GO:1902107	iv
GO:0032729	iv
GO:0046632	iv
GO:0045089	iv
GO:0002285	iv
GO:0071222	iv
GO:0045954	iv
GO:0000819	iv
GO:0007059	iv
GO:0002717	iv
GO:1903706	iv
GO:0035710	iv
GO:0032103	iv
GO:0002286	iv
GO:0000070	iv
GO:0043367	iv
GO:0098813	iv
GO:0140014	iv
GO:0002292	iv
GO:1903708	iv
GO:0051304	iv
GO:0030101	iv
GO:0002287	iv
GO:0002293	iv
GO:0045058	iv
GO:0019932	iv
GO:0010965	iv
GO:0002446	iv
GO:0043368	iv
GO:0051306	iv
GO:0050852	iv
GO:1905818	iv
GO:0000280	iv
GO:0030071	iv
GO:1902099	iv
GO:0019882	iv
GO:0007091	iv
GO:0002700	iv
GO:0042119	iv
GO:0044784	iv
GO:0090307	iv
GO:0043312	iv
GO:0002283	iv
GO:0051983	iv
GO:0033047	iv
GO:0071216	iv
GO:0050663	iv
GO:0048247	iv
GO:0097529	iv
GO:1990266	iv
GO:0071621	iv
GO:0048872	iv
GO:0010818	iv
GO:0002294	iv
GO:0019722	iv
GO:0071346	iv
GO:0046637	iv
GO:0002824	iv
GO:0006968	iv
GO:0043370	iv
GO:0002821	iv
GO:0034341	iv
GO:0000083	iv
GO:0002685	iv
GO:2000514	iv
GO:0001776	iv
GO:0006816	iv
GO:0071887	iv
GO:0072678	iv
GO:0030888	iv
GO:0050848	iv
GO:0002456	iv
GO:0002688	iv
GO:0046638	iv
GO:0036037	iv
GO:0002690	iv
GO:0050868	iv
GO:1903038	iv
GO:0050921	iv
GO:0022408	iv
GO:0050707	iv
GO:0043372	iv
GO:0051924	iv
GO:0070838	iv
GO:0072511	iv
GO:0050920	iv
GO:0051209	iv
GO:0051283	iv
GO:0051282	iv
GO:0051208	iv
GO:0050850	iv
GO:2000516	iv
GO:0097553	iv
GO:0032663	iv
GO:0072540	iv
GO:0002295	iv
GO:0043373	iv
GO:0002363	iv
GO:0043369	iv
GO:0072539	iv
GO:0002687	iv
GO:0032845	iv
GO:1901623	iv
GO:0032653	iv
GO:0032613	iv
GO:0002260	iv
GO:0007204	iv
GO:0097028	iv
GO:0071356	iv
GO:0032623	iv
GO:0072507	iv
GO:0060402	iv
GO:0060401	iv
GO:0042035	iv
GO:0034612	iv
GO:0051101	iv
GO:0050702	iv
GO:0006874	iv
GO:0050777	iv
GO:0002702	iv
GO:0046641	iv
GO:0046640	iv
GO:0046633	iv
GO:0042107	iv
GO:0051480	iv
GO:0055074	iv
GO:0050701	iv
GO:0032611	iv
GO:0001773	iv
GO:0010959	iv
GO:0007162	iv
GO:2000401	iv
GO:0070227	iv
GO:0002698	iv
GO:0072503	iv
GO:0032655	iv
GO:0032615	iv
GO:2000106	iv
GO:0050715	iv
GO:0019835	iv
GO:0002548	iv
GO:0002218	iv
GO:0006925	iv
GO:0032612	iv
GO:0051235	iv
GO:0032945	iv
GO:0050672	iv
GO:0070664	iv
GO:0002704	iv
GO:0070231	iv
GO:0002532	iv
GO:0032760	iv
GO:0050714	iv
GO:0050718	iv
GO:2000403	iv
GO:0043029	iv
GO:1903557	iv
GO:0050764	iv
GO:0045589	iv
GO:0002714	iv
GO:0002891	iv
GO:0002534	iv
GO:0030890	iv
GO:0035747	iv
GO:0051782	iv
GO:0045076	iv
GO:0042094	iv
GO:0050716	iv
GO:0032731	iv
GO:0050706	iv
GO:0070228	iv
GO:0032733	iv
GO:0045066	iv
GO:0002712	iv
GO:0002889	iv
GO:0034113	iv
GO:0033028	iv
GO:0050704	iv
GO:0032651	iv
GO:0002507	iv
GO:2000352	iv
GO:1904036	iv
GO:0002639	iv
GO:0042088	iv
GO:0032732	iv
GO:0070588	iv
GO:2000107	iv
GO:0050918	iv
GO:0002793	iv
GO:0010819	iv
GO:0070232	iv
GO:2000351	iv
GO:0072577	iv
GO:0006953	iv
GO:0032652	iv
GO:0030574	iv

## Sheet: KIRP_Stage
ID	Stages
GO:0042119	i
GO:0002446	i
GO:0006953	i
GO:0002526	i
GO:0006959	ii
GO:0042119	ii
GO:0002446	ii
GO:0002283	ii
GO:0002455	ii
GO:0002673	ii
GO:0006958	ii
GO:0006956	ii
GO:0043312	ii
GO:0072376	ii
GO:0016064	ii
GO:0019724	ii
GO:1903317	ii
GO:0070613	ii
GO:0006909	ii
GO:0030449	ii
GO:2000257	ii
GO:0002920	ii
GO:0000280	ii
GO:0140014	ii
GO:0002449	ii
GO:0002460	ii
GO:0050727	ii
GO:0000075	ii
GO:0048285	ii
GO:0050900	ii
GO:0097529	ii
GO:0031570	ii
GO:0002697	ii
GO:0043300	ii
GO:0006898	ii
GO:0002768	ii
GO:0007059	ii
GO:0051304	ii
GO:0098813	ii
GO:0002683	ii
GO:0007088	ii
GO:0007093	ii
GO:0016485	ii
GO:0002886	ii
GO:0006911	ii
GO:0002224	ii
GO:0030595	ii
GO:0002526	ii
GO:0051604	ii
GO:0099024	ii
GO:0010324	ii
GO:0097530	ii
GO:0060326	ii
GO:0030593	ii
GO:1990266	ii
GO:0000083	ii
GO:0071621	ii
GO:1903305	ii
GO:0051782	ii
GO:0017157	ii
GO:0033003	ii
GO:0097028	ii
GO:1902563	ii
GO:0050866	ii
GO:0033004	ii
GO:0002887	ii
GO:0043301	ii
GO:1903306	ii
GO:0032945	ii
GO:0050672	ii
GO:0007059	iii
GO:0098813	iii
GO:0000819	iii
GO:0140014	iii
GO:0000280	iii
GO:0000070	iii
GO:0048285	iii
GO:0000075	iii
GO:0007062	iii
GO:0051304	iii
GO:0007093	iii
GO:0010965	iii
GO:0051983	iii
GO:0051306	iii
GO:1905818	iii
GO:0030071	iii
GO:0051783	iii
GO:1902099	iii
GO:0007091	iii
GO:0007088	iii
GO:0044784	iii
GO:0033045	iii
GO:0033047	iii
GO:1901990	iii
GO:0031570	iii
GO:1901987	iii
GO:0045132	iii
GO:0031577	iii
GO:2000816	iii
GO:1905819	iii
GO:0051321	iii
GO:0033048	iii
GO:0033046	iii
GO:0007094	iii
GO:0071173	iii
GO:0071174	iii
GO:0140013	iii
GO:0051985	iii
GO:0034502	iii
GO:0045841	iii
GO:1902100	iii
GO:1903046	iii
GO:1901988	iii
GO:0051784	iii
GO:0045839	iii
GO:0090307	iii
GO:0090068	iii
GO:1901991	iii
GO:0044843	iii
GO:0045930	iii
GO:0010948	iii
GO:0051225	iii
GO:0006270	iii
GO:0071459	iii
GO:0000083	iii
GO:0009913	iii
GO:0008544	iii
GO:0044774	iii
GO:0052548	iii
GO:0030216	iii
GO:0052547	iii
GO:0034501	iii
GO:0000076	iii
GO:0070268	iii
GO:0003002	iii
GO:0043588	iii
GO:0031424	iii
GO:0048732	iii
GO:0007389	iii
GO:0019730	iii
GO:0071621	iii
GO:0051101	iii
GO:0097530	iii
GO:0055123	iii
GO:0060525	iii
GO:0023061	iii
GO:0051782	iii
GO:0048736	iii
GO:0060173	iii
GO:0045861	iii
GO:0006836	iii
GO:0007059	iv
GO:0098813	iv
GO:0000819	iv
GO:0000280	iv
GO:0140014	iv
GO:0048285	iv
GO:0000070	iv
GO:0007062	iv
GO:0051983	iv
GO:0051304	iv
GO:0007088	iv
GO:0010965	iv
GO:0051783	iv
GO:0051306	iv
GO:1905818	iv
GO:0030071	iv
GO:1902099	iv
GO:0000075	iv
GO:0007091	iv
GO:0044784	iv
GO:0033045	iv
GO:0033047	iv
GO:0007093	iv
GO:1901990	iv
GO:0051321	iv
GO:1902850	iv
GO:2000816	iv
GO:0140013	iv
GO:1901987	iv
GO:1905819	iv
GO:0033048	iv
GO:1903046	iv
GO:0045132	iv
GO:0033046	iv
GO:0000226	iv
GO:0051985	iv
GO:0031570	iv
GO:0007052	iv
GO:0045839	iv
GO:0090068	iv
GO:0007080	iv
GO:0051310	iv
GO:0090307	iv
GO:0033044	iv
GO:0051303	iv
GO:0045930	iv
GO:0050000	iv
GO:1901988	iv
GO:0044839	iv
GO:0007051	iv
GO:0045787	iv
GO:0010948	iv
GO:0061640	iv
GO:2001251	iv
GO:1901991	iv
GO:0006260	iv
GO:0000086	iv
GO:0000281	iv
GO:0051225	iv
GO:0044843	iv
GO:0000910	iv
GO:0071103	iv
GO:1901989	iv
GO:0006323	iv
GO:0045931	iv
GO:0000082	iv
GO:0051784	iv
GO:0006270	iv
GO:0031577	iv
GO:1901992	iv
GO:0034502	iv
GO:0007094	iv
GO:0071173	iv
GO:0071174	iv
GO:0045841	iv
GO:1902100	iv
GO:0007127	iv
GO:0034508	iv
GO:0071459	iv
GO:0007131	iv
GO:0035825	iv
GO:0000077	iv
GO:0008608	iv
GO:0030261	iv
GO:0044774	iv
GO:0051383	iv
GO:0007076	iv
GO:0034501	iv
GO:0000083	iv
GO:0071156	iv
GO:0000079	iv
GO:1904029	iv
GO:0000076	iv
GO:0070268	iv
GO:0070192	iv
GO:0051315	iv
GO:0030574	iv
GO:0044243	iv
GO:0071158	iv

## Sheet: LUAD_Stage
ID	Stages
GO:0006335	i
GO:0034723	i
GO:0006323	i
GO:0006334	i
GO:0031497	i
GO:0006342	i
GO:0034728	i
GO:0000183	i
GO:0051290	i
GO:0006333	i
GO:0045814	i
GO:0071103	i
GO:0065004	i
GO:0071824	i
GO:0060968	i
GO:0045652	i
GO:0045815	i
GO:0060147	i
GO:0060966	i
GO:0060964	i
GO:0045653	i
GO:0051291	i
GO:0048863	i
GO:0030219	i
GO:1902036	i
GO:0032200	i
GO:0038111	i
GO:0060218	i
GO:1901532	i
GO:0098760	i
GO:0098761	i
GO:0000819	i
GO:2000736	i
GO:0000070	i
GO:0051262	i
GO:1904837	i
GO:0034080	i
GO:0061641	i
GO:0031055	i
GO:0006336	i
GO:0034724	i
GO:0034508	i
GO:0043486	i
GO:0051321	i
GO:0002385	i
GO:0002251	i
GO:0000280	ii
GO:0000819	ii
GO:0007059	ii
GO:0000070	ii
GO:0098813	ii
GO:0140014	ii
GO:0051321	ii
GO:0051983	ii
GO:0048285	ii
GO:0030071	ii
GO:1902099	ii
GO:0051304	ii
GO:0007091	ii
GO:0007062	ii
GO:0140013	ii
GO:0044784	ii
GO:0010965	ii
GO:0051306	ii
GO:1903046	ii
GO:1905818	ii
GO:0045132	ii
GO:0051783	ii
GO:0033047	ii
GO:0033045	ii
GO:0008608	ii
GO:0031577	ii
GO:0030261	ii
GO:0007088	ii
GO:0030198	ii
GO:0043062	ii
GO:0072376	ii
GO:0006910	ii
GO:0051307	ii
GO:0051216	ii
GO:0007127	ii
GO:0042742	ii
GO:0006959	ii
GO:0048705	ii
GO:0070268	ii
GO:0030574	ii
GO:0032963	ii
GO:0044259	ii
GO:0048483	ii
GO:0031424	ii
GO:0044243	ii
GO:0061351	ii
GO:0044236	ii
GO:0001501	ii
GO:0030216	ii
GO:0009952	ii
GO:0009913	ii
GO:0003002	ii
GO:0043588	ii
GO:0048706	ii
GO:0000819	iii
GO:0000070	iii
GO:0007059	iii
GO:0098813	iii
GO:0051983	iii
GO:0000280	iii
GO:0140014	iii
GO:0051321	iii
GO:0030071	iii
GO:1902099	iii
GO:0048285	iii
GO:0007091	iii
GO:0044784	iii
GO:0007062	iii
GO:0010965	iii
GO:0051306	iii
GO:1905818	iii
GO:0051304	iii
GO:0008608	iii
GO:0033047	iii
GO:0033045	iii
GO:0031577	iii
GO:0045132	iii
GO:0051310	iii
GO:0070268	iii
GO:0030216	iii
GO:0031424	iii
GO:0043588	iii
GO:0009913	iii
GO:0009952	iii
GO:0008544	iii
GO:0001501	iii
GO:0048705	iii
GO:0030574	iii
GO:0044243	iii
GO:0003002	iii
GO:0032963	iii
GO:0007389	iii
GO:0002065	iii
GO:0061351	iii
GO:0048706	iii
GO:0007059	iv
GO:0000070	iv
GO:0000819	iv
GO:0098813	iv
GO:0000280	iv
GO:0140014	iv
GO:0048285	iv
GO:0051983	iv
GO:0030071	iv
GO:0051321	iv
GO:1902099	iv
GO:0007091	iv
GO:0044784	iv
GO:1902850	iv
GO:0007062	iv
GO:0051304	iv
GO:0010965	iv
GO:0051306	iv
GO:0008608	iv
GO:1905818	iv
GO:0033047	iv
GO:0007088	iv
GO:0051783	iv
GO:0033045	iv
GO:0007052	iv
GO:0051310	iv
GO:0045132	iv
GO:0140013	iv
GO:0031577	iv
GO:0071459	iv
GO:0034502	iv
GO:0051303	iv
GO:0050000	iv
GO:0007051	iv
GO:1903046	iv
GO:0007094	iv
GO:0071173	iv
GO:0071174	iv
GO:0033046	iv
GO:0045841	iv
GO:0007093	iv
GO:0051985	iv
GO:0090307	iv
GO:1902100	iv
GO:0006270	iv
GO:0007080	iv
GO:0034501	iv
GO:2000816	iv
GO:0051225	iv
GO:0000075	iv
GO:1905819	iv
GO:0000910	iv
GO:0033048	iv
GO:0030261	iv
GO:0051962	iv
GO:0090068	iv
GO:0061640	iv
GO:0000281	iv
GO:0045839	iv
GO:0051784	iv
GO:0000083	iv
GO:0007127	iv
GO:0021953	iv
GO:0000076	iv
GO:0051383	iv
GO:0030900	iv
GO:0010720	iv
GO:0021879	iv
GO:0001501	iv
GO:0021872	iv
GO:0051315	iv
GO:0000022	iv
GO:0003002	iv
GO:0048857	iv
GO:0021537	iv
GO:0051307	iv
GO:0006836	iv
GO:0023061	iv
GO:0007389	iv
GO:0048706	iv
GO:0003333	iv
GO:0045104	iv
GO:0045103	iv
GO:0051782	iv
GO:0048736	iv
GO:0060173	iv
GO:0071804	iv
GO:0071805	iv
GO:0021543	iv
GO:0035107	iv
GO:0035108	iv
GO:0048705	iv
GO:0035404	iv
GO:0048663	iv
GO:0021675	iv
GO:0009953	iv
GO:0021510	iv
GO:0030072	iv
GO:0021772	iv
GO:0021988	iv
GO:0042472	iv
GO:0030073	iv
GO:0046879	iv
GO:0048562	iv
GO:0070268	iv
GO:0048565	iv
GO:0031018	iv
GO:0002067	iv
GO:0002065	iv
GO:0061351	iv

## Sheet: STAD_Stage
ID	Stages
GO:0045861	i
GO:0030195	i
GO:1900047	i
GO:0010466	i
GO:0010951	i
GO:0050819	i
GO:0002526	i
GO:0051346	i
GO:1903035	i
GO:0030193	i
GO:1900046	i
GO:0061045	i
GO:0050818	i
GO:0072376	i
GO:0072378	i
GO:0006959	i
GO:0052547	i
GO:0052548	i
GO:0002920	i
GO:2000257	i
GO:0061041	i
GO:1903034	i
GO:0016485	i
GO:0030449	i
GO:0051604	i
GO:0002576	i
GO:0070613	i
GO:1903317	i
GO:0006898	i
GO:0042730	i
GO:0019835	i
GO:0006953	i
GO:0090303	i
GO:0031639	i
GO:0007597	i
GO:0030198	i
GO:0043062	i
GO:0030574	i
GO:0044243	i
GO:0048705	i
GO:0051918	i
GO:0051917	i
GO:0030194	i
GO:1900048	i
GO:0050820	i
GO:0032963	i
GO:0044259	i
GO:0044236	i
GO:0045919	i
GO:0001501	i
GO:0042268	i
GO:0031640	i
GO:0044364	i
GO:0030198	ii
GO:0043062	ii
GO:0051216	ii
GO:0030574	ii
GO:0044243	ii
GO:0032963	ii
GO:0044259	ii
GO:0044236	ii
GO:0010818	ii
GO:0032103	ii
GO:0001501	ii
GO:0002690	ii
GO:0070098	ii
GO:0051281	ii
GO:0010524	ii
GO:0048706	ii
GO:0032846	ii
GO:0048705	ii
GO:0030198	iii
GO:0043062	iii
GO:0030574	iii
GO:0044243	iii
GO:0032963	iii
GO:0044259	iii
GO:0044236	iii
GO:0001501	iii
GO:0051216	iii
GO:0061448	iii
GO:0070098	iii
GO:0051281	iii
GO:0010524	iii
GO:0021879	iii
GO:0002690	iii
GO:0021953	iii
GO:0006953	iii
GO:0003002	iii
GO:0007389	iii
GO:0048705	iii
GO:0045165	iii
GO:0009954	iii
GO:0048663	iii
GO:0007498	iii
GO:0021877	iii
GO:0021892	iii
GO:0060850	iii
GO:0060065	iii
GO:0021895	iii
GO:0021544	iii
GO:0030326	iii
GO:0035113	iii
GO:0035107	iii
GO:0035108	iii
GO:0097154	iii
GO:0030574	iv
GO:0044243	iv
GO:0030198	iv
GO:0043062	iv
GO:0032963	iv
GO:0044259	iv
GO:0044236	iv
GO:0002526	iv
GO:0051216	iv
GO:0061448	iv
GO:0030199	iv
GO:0001501	iv
GO:0060326	iv
GO:0048705	iv
GO:0006953	iv
GO:0002690	iv
GO:0002688	iv
GO:0002687	iv
GO:0070098	iv
GO:0050921	iv
GO:0090023	iv
GO:0071624	iv
GO:1902624	iv
GO:0090022	iv
GO:1902622	iv
GO:0071622	iv
GO:0030595	iv
GO:0030593	iv
GO:0071621	iv
GO:0030335	iv
GO:2000147	iv
GO:0051272	iv
GO:1990266	iv
GO:0097530	iv

## Sheet: THCA_Stage
ID	Stages
GO:0030195	i
GO:1900047	i
GO:0050819	i
GO:0002446	i
GO:0002576	i
GO:0042119	i
GO:0043312	i
GO:0002283	i
GO:0030198	i
GO:0043062	i
GO:0030193	i
GO:1900046	i
GO:0050818	i
GO:0052547	i
GO:0061045	i
GO:0043588	i
GO:1903035	i
GO:0008544	i
GO:0034330	i
GO:0061041	i
GO:0042730	i
GO:1903034	i
GO:0052548	i
GO:0032102	i
GO:0007596	i
GO:0007599	i
GO:0001525	i
GO:0045861	i
GO:0050817	i
GO:0007162	i
GO:0031589	i
GO:0050900	i
GO:0031639	i
GO:0043687	i
GO:0022604	i
GO:0070371	i
GO:0010951	i
GO:0030216	i
GO:0010466	i
GO:0009913	i
GO:0051346	i
GO:0070372	i
GO:0022617	i
GO:0032963	i
GO:0044259	i
GO:0010769	i
GO:0030574	i
GO:0044243	i
GO:0044236	i
GO:0031424	i
GO:0070268	i
GO:0035296	i
GO:0097746	i
GO:0050880	i
GO:0035150	i
GO:0098742	i
GO:0001704	i
GO:0003018	i
GO:0001501	i
GO:0070374	i
GO:0001706	i
GO:0016485	i
GO:0045907	i
GO:0090066	i
GO:0019730	i
GO:0007492	i
GO:0001655	i
GO:0006959	i
GO:0070555	i
GO:0033627	i
GO:0019229	i
GO:0042310	i
GO:0061436	i
GO:0033561	i
GO:0001958	i
GO:0036075	i
GO:0001523	i
GO:0016101	i
GO:0006721	i
GO:0097756	i
GO:0006720	i
GO:0019731	i
GO:0008544	ii
GO:0043588	ii
GO:0001525	ii
GO:0022617	ii
GO:0030198	ii
GO:0043062	ii
GO:0034330	ii
GO:0007416	ii
GO:0050808	ii
GO:0050890	ii
GO:0010975	ii
GO:0010466	ii
GO:0010769	ii
GO:0007611	ii
GO:0045216	ii
GO:0001523	ii
GO:0030198	iii
GO:0043062	iii
GO:0030574	iii
GO:0044243	iii
GO:0043588	iii
GO:0008544	iii
GO:0070268	iii
GO:0032963	iii
GO:0044259	iii
GO:0044236	iii
GO:0030216	iii
GO:0009913	iii
GO:0031424	iii
GO:0001501	iii
GO:0030199	iii
GO:0052547	iii
GO:0052548	iii
GO:0002576	iii
GO:0002446	iii
GO:0042119	iii
GO:0034330	iii
GO:0043312	iii
GO:0002283	iii
GO:0045861	iii
GO:0030195	iii
GO:1900047	iii
GO:0050819	iii
GO:0030193	iii
GO:1900046	iii
GO:0050818	iii
GO:0010951	iii
GO:0007596	iii
GO:0007599	iii
GO:0050817	iii
GO:0061448	iii
GO:0010466	iii
GO:0001503	iii
GO:0051346	iii
GO:0061045	iii
GO:0061041	iii
GO:0042730	iii
GO:1903035	iii
GO:1903034	iii
GO:0031589	iii
GO:0043687	iii
GO:0051216	iii
GO:0045104	iii
GO:0045103	iii
GO:0010810	iii
GO:0001525	iii
GO:0001667	iii
GO:0007162	iii
GO:0050900	iii
GO:0032102	iii
GO:0031638	iii
GO:0010811	iii
GO:0070371	iii
GO:0022617	iii
GO:0031581	iii
GO:0001704	iii
GO:0060350	iii
GO:0033627	iii
GO:0061564	iii
GO:0007369	iii
GO:0045682	iii
GO:0018149	iii
GO:0001706	iii
GO:0007409	iii
GO:0007492	iii
GO:0098742	iii
GO:0010769	iii
GO:0001958	iii
GO:0036075	iii
GO:0045907	iii
GO:0042303	iii
GO:0042633	iii
GO:0001655	iii
GO:0019229	iii
GO:1903524	iii
GO:0035987	iii
GO:0042310	iii
GO:0019730	iii
GO:0007156	iii
GO:0006959	iii
GO:0016485	iii
GO:0030574	iv
GO:0030198	iv
GO:0043062	iv
GO:0044243	iv
GO:0032963	iv
GO:0044259	iv
GO:0044236	iv
GO:0043588	iv
GO:0030199	iv
GO:0001501	iv
GO:0001503	iv
GO:0002446	iv
GO:0042119	iv
GO:0043312	iv
GO:0002283	iv
GO:0008544	iv
GO:0070268	iv
GO:0009913	iv
GO:0031424	iv
GO:0030216	iv
GO:0052547	iv
GO:0050900	iv
GO:0090596	iv
GO:0052548	iv
GO:0030593	iv
GO:0060350	iv
GO:0007162	iv
GO:0043687	iv
GO:1990266	iv
GO:0031589	iv
GO:0060349	iv
GO:0071621	iv
GO:0001525	iv
GO:0097530	iv
GO:0035987	iv
GO:0097529	iv
GO:0022617	iv
GO:0001704	iv
GO:0001958	iv
GO:0036075	iv
GO:0001706	iv
GO:0007492	iv
GO:0010951	iv
GO:0030260	iv
GO:0044409	iv
GO:0051806	iv
GO:0051828	iv
GO:0010466	iv
GO:0001101	iv
GO:0016485	iv
GO:0061436	iv
GO:0033561	iv
GO:0045861	iv
GO:0051604	iv
GO:0050918	iv
GO:0050891	iv
