# Supplementary material for: Co-expression based cancer staging and application
Source: Sci Rep. 2020 Jun 30;10:10624. doi: 10.1038/s41598-020-67476-7 (PMC7327081; doi:10.1038/s41598-020-67476-7)
Supplement: Supplementary file 7 — Supplementary file7 [file 41598_2020_67476_MOESM7_ESM.xlsx]

## Sheet: BRCA_Stage
Down
ID	Stages(Down)
GO:0016042	i
GO:0010876	i
GO:1901615	i
GO:0009743	i
GO:0006066	i
GO:0034284	i
GO:0006094	i
GO:0019319	i
GO:0046364	i
GO:0046486	i
GO:1905952	i
GO:0006869	i
GO:0044242	i
GO:0006006	i
GO:0019318	i
GO:0005996	i
GO:0008217	i
GO:0015850	i
GO:0045444	i
GO:0050873	i
GO:0016051	i
GO:0032868	i
GO:0001101	i
GO:0051051	i
GO:0010883	i
GO:1905954	i
GO:0003018	i
GO:0019216	i
GO:0014074	i
GO:0051048	i
GO:0006631	i
GO:0046683	i
GO:0032869	i
GO:0033500	i
GO:0042593	i
GO:0015671	i
GO:0015669	i
GO:0042744	i
GO:1900542	i
GO:0006140	i
GO:1901342	i
GO:1901653	i
GO:0019915	i
GO:0030802	i
GO:1900371	i
GO:0030808	i
GO:0052652	i
GO:0009190	i
GO:0030799	i
GO:0030301	i
GO:0015918	i
GO:0035994	i
GO:0010743	i
GO:0010742	i
GO:0090077	i
GO:0015701	i
GO:0048662	i
GO:0009187	i
GO:1901652	i
GO:0008203	i
GO:0050982	i
GO:0014823	i
GO:0007588	i
GO:0045981	i
GO:1900544	i
GO:0035296	i
GO:0097746	i
GO:0043434	i
GO:0006641	i
GO:0006639	i
GO:0006638	i
GO:0016042	ii
GO:0010876	ii
GO:0006869	ii
GO:0006066	ii
GO:0034284	ii
GO:0008643	ii
GO:0009743	ii
GO:0050873	ii
GO:0006094	ii
GO:0019319	ii
GO:0046364	ii
GO:1905952	ii
GO:1901615	ii
GO:0015850	ii
GO:0051048	ii
GO:0046888	ii
GO:0045444	ii
GO:0032868	ii
GO:0019216	ii
GO:0006006	ii
GO:0009746	ii
GO:0048738	ii
GO:0016051	ii
GO:0019318	ii
GO:0005996	ii
GO:0030049	ii
GO:0033275	ii
GO:1905954	ii
GO:0046323	ii
GO:0030301	ii
GO:0015918	ii
GO:0019915	ii
GO:0010817	ii
GO:0051051	ii
GO:1901652	ii
GO:0060047	ii
GO:0003015	ii
GO:0014706	ii
GO:0060048	ii
GO:1901653	ii
GO:0002026	ii
GO:0015758	ii
GO:0008645	ii
GO:0015749	ii
GO:0006631	ii
GO:0070252	ii
GO:0030048	ii
GO:0010743	ii
GO:0010742	ii
GO:0090077	ii
GO:0060537	ii
GO:0006091	ii
GO:0034308	ii
GO:0003205	ii
GO:0043434	ii
GO:0007517	ii
GO:0055008	ii
GO:1903522	ii
GO:0032642	ii
GO:0032602	ii
GO:0097006	ii
GO:0060415	ii
GO:0048644	ii
GO:0050731	ii
GO:0008016	ii
GO:0001101	ii
GO:0042445	ii
GO:0050730	ii
GO:0006936	ii
GO:0003007	ii
GO:0071375	ii
GO:0045471	ii
GO:0033500	ii
GO:0042593	ii
GO:0016054	ii
GO:0046395	ii
GO:0030258	ii
GO:0010883	ii
GO:0051591	ii
GO:0001765	ii
GO:0030299	ii
GO:0098856	ii
GO:0042448	ii
GO:0016042	iii
GO:0010876	iii
GO:0009743	iii
GO:0034284	iii
GO:0044242	iii
GO:1905952	iii
GO:0006066	iii
GO:0006869	iii
GO:0019915	iii
GO:1901615	iii
GO:0001525	iii
GO:0045765	iii
GO:1901342	iii
GO:0050873	iii
GO:0008643	iii
GO:1905954	iii
GO:0016054	iii
GO:0046395	iii
GO:0006094	iii
GO:0019319	iii
GO:0046364	iii
GO:0010883	iii
GO:0034308	iii
GO:0015850	iii
GO:0006631	iii
GO:0006006	iii
GO:0019318	iii
GO:0005996	iii
GO:0051048	iii
GO:0046883	iii
GO:0019433	iii
GO:0046461	iii
GO:0046464	iii
GO:0032868	iii
GO:0046503	iii
GO:0046888	iii
GO:0010817	iii
GO:0044282	iii
GO:1903522	iii
GO:0015671	iii
GO:0015669	iii
GO:0042744	iii
GO:0019216	iii
GO:0051051	iii
GO:0046323	iii
GO:0030301	iii
GO:0015918	iii
GO:0033500	iii
GO:0042593	iii
GO:0072593	iii
GO:0010743	iii
GO:0010742	iii
GO:0090077	iii
GO:0042743	iii
GO:0002026	iii
GO:0015758	iii
GO:0003231	iii
GO:0008645	iii
GO:0015749	iii
GO:0008016	iii
GO:0042445	iii
GO:0033002	iii
GO:0010884	iii
GO:0015701	iii
GO:0045444	iii
GO:0006732	iii
GO:0001101	iii
GO:0060047	iii
GO:0003015	iii
GO:0032869	iii
GO:0050730	iii
GO:0016051	iii
GO:0003205	iii
GO:0050890	iv
GO:0007611	iv
GO:0016042	iv
GO:0018108	iv
GO:0018212	iv
GO:0007612	iv
GO:0060326	iv
GO:0033555	iv
GO:0050804	iv
GO:0007568	iv
GO:0050673	iv
GO:0048565	iv
GO:0070371	iv
GO:0048015	iv
GO:0048017	iv
GO:0048167	iv
GO:0014065	iv
GO:0043491	iv
GO:2000146	iv
GO:0030336	iv
GO:0055123	iv
GO:0007613	iv
GO:0051051	iv
GO:0001503	iv
GO:0046486	iv
GO:0050678	iv
GO:1900542	iv
GO:0006140	iv
GO:0051271	iv
GO:0040013	iv
GO:0050679	iv
GO:0042063	iv
GO:0019233	iv
GO:0003018	iv
GO:0051896	iv
GO:0050795	iv
GO:1901342	iv
GO:2000021	iv
GO:0006939	iv
GO:1905954	iv
GO:0019433	iv
GO:0046461	iv
GO:0046464	iv
GO:0051966	iv
GO:0050730	iv
GO:1905952	iv
GO:0030799	iv
GO:0050731	iv
GO:0060078	iv
GO:0050806	iv
GO:0006066	iv
GO:0060291	iv
GO:0035249	iv
GO:0051048	iv
GO:0030595	iv
GO:0010863	iv
GO:1900274	iv
GO:0010518	iv
GO:0030818	iv
GO:0006953	iv
GO:0030803	iv
GO:0030815	iv
GO:0030809	iv
GO:1900372	iv
GO:0030800	iv
GO:0009187	iv
GO:0050900	iv
GO:0097529	iv
GO:0051897	iv
GO:0050727	iv
GO:0030814	iv
GO:0035296	iv
GO:0097746	iv
GO:0015844	iv
GO:0006094	iv
GO:0019319	iv
GO:0046364	iv
GO:0032355	iv
GO:0010517	iv
GO:0043534	iv
GO:1903524	iv
GO:0097756	iv
GO:0031579	iv
GO:0030431	iv
GO:0060193	iv
GO:0032844	iv
GO:0072507	iv
GO:0030212	iv
GO:0002042	iv
GO:0050918	iv
GO:0050880	iv
GO:0035150	iv
GO:0009165	iv
GO:0045765	iv
GO:0001525	iv
GO:0030802	iv
GO:1900371	iv
GO:0030808	iv
GO:0046058	iv
GO:0052652	iv
GO:0009190	iv
GO:0010884	iv
GO:0006816	iv
GO:0099565	iv
GO:0034308	iv
GO:0035725	iv
GO:0070838	iv
GO:0072511	iv
GO:0007623	iv

## Sheet: COAD_Stage
ID	Stages
GO:0006936	i
GO:0003012	i
GO:0042391	i
GO:0050808	i
GO:0006937	i
GO:0090257	i
GO:0010959	i
GO:0001508	i
GO:0034765	i
GO:0035637	i
GO:1903522	i
GO:0034762	i
GO:0060047	i
GO:0003015	i
GO:0051924	i
GO:0060078	i
GO:0008016	i
GO:0006816	i
GO:0010522	i
GO:1904062	i
GO:0070838	i
GO:0072511	i
GO:0060402	i
GO:0060401	i
GO:0006869	i
GO:0006941	i
GO:0006814	i
GO:0006836	i
GO:0051480	i
GO:0051279	i
GO:0006942	i
GO:0071294	i
GO:0023061	i
GO:0007204	i
GO:0010876	i
GO:0061564	i
GO:2000021	i
GO:0032412	i
GO:0022898	i
GO:0046942	i
GO:0015849	i
GO:0051209	i
GO:0051283	i
GO:0051282	i
GO:0051208	i
GO:0050804	i
GO:0032409	i
GO:0006813	i
GO:0006958	i
GO:0006939	i
GO:0007611	i
GO:0050890	i
GO:1903779	i
GO:0002027	i
GO:0051899	i
GO:0030239	i
GO:0061337	i
GO:0002455	i
GO:0006956	i
GO:0016064	i
GO:0019724	i
GO:0072507	i
GO:0071804	i
GO:0071805	i
GO:0010880	i
GO:0014808	i
GO:1903514	i
GO:0070296	i
GO:0006865	i
GO:0050806	i
GO:0007269	i
GO:0099643	i
GO:0099531	i
GO:0015718	i
GO:0006874	i
GO:0055074	i
GO:0019932	i
GO:0072376	i
GO:0060314	i
GO:0006909	i
GO:0010043	i
GO:0001505	i
GO:0015711	i
GO:0030534	i
GO:0051932	i
GO:0072503	i
GO:0006959	i
GO:0002449	i
GO:0002460	i
GO:0006940	i
GO:0055001	i
GO:0060079	i
GO:0043271	i
GO:0098656	i
GO:0032844	i
GO:0046883	i
GO:0043270	i
GO:0043266	i
GO:0007626	i
GO:0003333	i
GO:0099565	i
GO:0007218	i
GO:0006936	ii
GO:0042391	ii
GO:0003012	ii
GO:0002455	ii
GO:0006958	ii
GO:0006874	ii
GO:0072507	ii
GO:0055074	ii
GO:0006956	ii
GO:0019932	ii
GO:0006937	ii
GO:0008016	ii
GO:0035637	ii
GO:1903522	ii
GO:0060047	ii
GO:0003015	ii
GO:0072376	ii
GO:0016064	ii
GO:0051480	ii
GO:0019724	ii
GO:0010959	ii
GO:0090257	ii
GO:0071804	ii
GO:0071805	ii
GO:0006813	ii
GO:0034762	ii
GO:0006959	ii
GO:0034765	ii
GO:0061337	ii
GO:0006816	ii
GO:0051924	ii
GO:0007204	ii
GO:0061564	ii
GO:2000021	ii
GO:1904062	ii
GO:0070838	ii
GO:0072511	ii
GO:0010522	ii
GO:0032412	ii
GO:0019722	ii
GO:0032409	ii
GO:0022898	ii
GO:0006941	ii
GO:0002449	ii
GO:0002460	ii
GO:0032844	ii
GO:0051279	ii
GO:0060402	ii
GO:0006909	ii
GO:0060401	ii
GO:1901019	ii
GO:0072503	ii
GO:2001257	ii
GO:0001505	ii
GO:0001508	ii
GO:0006910	ii
GO:0007409	ii
GO:1903779	ii
GO:0006939	ii
GO:0043266	ii
GO:0043270	ii
GO:0006836	ii
GO:0010880	ii
GO:0014808	ii
GO:1903514	ii
GO:0070296	ii
GO:0060314	ii
GO:0023061	ii
GO:0071294	ii
GO:0050808	ii
GO:0006942	ii
GO:0060078	ii
GO:0008037	ii
GO:1904064	ii
GO:0034764	ii
GO:0002027	ii
GO:0051928	ii
GO:0002433	ii
GO:0038096	ii
GO:0038094	ii
GO:0002431	ii
GO:0010043	ii
GO:0002920	ii
GO:2001259	ii
GO:0030449	ii
GO:2000257	ii
GO:0050804	ii
GO:0006898	ii
GO:0034378	ii
GO:0034370	ii
GO:0055078	ii
GO:0001764	ii
GO:0035725	ii
GO:0050807	ii
GO:0050803	ii
GO:0002673	ii
GO:0034367	ii
GO:0034368	ii
GO:0034369	ii
GO:0007215	ii
GO:0007612	ii
GO:0070613	ii
GO:1903317	ii
GO:0006940	ii
GO:0033555	ii
GO:0050806	ii
GO:0007611	ii
GO:0003018	ii
GO:0016485	ii
GO:0006814	ii
GO:0050890	ii
GO:0019433	ii
GO:0046461	ii
GO:0046464	ii
GO:0050900	ii
GO:0006936	iii
GO:0006958	iii
GO:0003012	iii
GO:0042391	iii
GO:0010959	iii
GO:0006937	iii
GO:1903522	iii
GO:0006939	iii
GO:0008016	iii
GO:0060047	iii
GO:0003015	iii
GO:2000021	iii
GO:0090257	iii
GO:0034762	iii
GO:0034765	iii
GO:0002455	iii
GO:0006956	iii
GO:0006909	iii
GO:0016064	iii
GO:0019724	iii
GO:0071804	iii
GO:0071805	iii
GO:0072376	iii
GO:0051480	iii
GO:0002449	iii
GO:0002460	iii
GO:0006959	iii
GO:0006813	iii
GO:0001505	iii
GO:0061564	iii
GO:0051924	iii
GO:0035637	iii
GO:0019932	iii
GO:0006874	iii
GO:0055074	iii
GO:0072507	iii
GO:0072503	iii
GO:0006816	iii
GO:0007626	iii
GO:0010522	iii
GO:0070838	iii
GO:0072511	iii
GO:0002433	iii
GO:0038096	iii
GO:0038094	iii
GO:0002431	iii
GO:0061337	iii
GO:0030449	iii
GO:2000257	iii
GO:0010880	iii
GO:0006836	iii
GO:0002920	iii
GO:0043270	iii
GO:0002027	iii
GO:0043266	iii
GO:0002673	iii
GO:1901379	iii
GO:0055078	iii
GO:0060078	iii
GO:0023061	iii
GO:0071294	iii
GO:0070613	iii
GO:1903317	iii
GO:0007269	iii
GO:0099643	iii
GO:0006898	iii
GO:0002526	iii
GO:1903779	iii
GO:0051928	iii
GO:0016485	iii
GO:0010043	iii
GO:0046883	iii
GO:0055067	iii
GO:0046879	iii
GO:0009914	iii
GO:0051963	iii
GO:0051952	iii
GO:0015837	iii
GO:0034378	iii
GO:0010896	iii
GO:0034370	iii
GO:0006958	iv
GO:0002455	iv
GO:0006956	iv
GO:0072376	iv
GO:0016064	iv
GO:0019724	iv
GO:0006959	iv
GO:0030449	iv
GO:2000257	iv
GO:0002460	iv
GO:0002920	iv
GO:0002449	iv
GO:0006909	iv
GO:0002673	iv
GO:0070613	iv
GO:1903317	iv
GO:0050900	iv
GO:0002433	iv
GO:0038096	iv
GO:0038094	iv
GO:0002431	iv
GO:0002526	iv
GO:0006898	iv
GO:0002768	iv
GO:0002429	iv
GO:0038095	iv
GO:0016485	iv
GO:0006910	iv
GO:0002377	iv
GO:0050853	iv
GO:0051604	iv
GO:0038093	iv
GO:0050727	iv
GO:0006936	iv
GO:0002440	iv
GO:0003012	iv
GO:0006911	iv
GO:0099024	iv
GO:0008037	iv
GO:0010324	iv
GO:0002697	iv
GO:0042391	iv
GO:0050871	iv
GO:0050864	iv
GO:0042742	iv
GO:0042113	iv
GO:0010959	iv
GO:0061564	iv
GO:0050851	iv
GO:0090257	iv
GO:0071804	iv
GO:0071805	iv
GO:0006937	iv
GO:0071294	iv
GO:0006813	iv
GO:0006939	iv
GO:0010043	iv
GO:0043270	iv
GO:0060078	iv
GO:0072507	iv
GO:0051480	iv
GO:0034378	iv
GO:0034370	iv
GO:0006874	iv
GO:0055074	iv
GO:0034367	iv
GO:0034368	iv
GO:0034369	iv
GO:0072503	iv
GO:0007626	iv

## Sheet: HNSC_Stage
ID	Stages
GO:0006936	i
GO:0003012	i
GO:0030049	i
GO:0033275	i
GO:0030239	i
GO:0006941	i
GO:0070252	i
GO:0030048	i
GO:0010927	i
GO:0055001	i
GO:0003009	i
GO:0045214	i
GO:0055002	i
GO:0050879	i
GO:0050881	i
GO:0051146	i
GO:0060047	i
GO:0003015	i
GO:0031032	i
GO:0042692	i
GO:0048747	i
GO:0034762	i
GO:0034765	i
GO:0090257	i
GO:0008016	i
GO:0014706	i
GO:0060537	i
GO:1903522	i
GO:0006937	i
GO:0007517	i
GO:0060048	i
GO:0007519	i
GO:0006942	i
GO:0060538	i
GO:0014902	i
GO:0010959	i
GO:0070296	i
GO:0032412	i
GO:0055008	i
GO:0061337	i
GO:0048738	i
GO:0035637	i
GO:0060415	i
GO:0043502	i
GO:0022898	i
GO:1904062	i
GO:0014808	i
GO:1903514	i
GO:0042391	i
GO:1903779	i
GO:0032409	i
GO:0002027	i
GO:0071688	i
GO:0031034	i
GO:0031033	i
GO:0048741	i
GO:0014904	i
GO:0043500	i
GO:0072507	i
GO:0055074	i
GO:0010880	i
GO:0090075	i
GO:0055013	i
GO:0051279	i
GO:0055006	i
GO:0002026	i
GO:0043462	i
GO:0014888	i
GO:0010830	i
GO:0043270	i
GO:0043501	i
GO:0014819	i
GO:0006813	i
GO:1904064	i
GO:0034767	i
GO:0034764	i
GO:0014733	i
GO:0071804	i
GO:0071805	i
GO:0001895	i
GO:2001259	i
GO:0001894	i
GO:0035082	i
GO:0001578	i
GO:0044782	i
GO:0060271	i
GO:1901077	i
GO:0032414	i
GO:0016266	i
GO:0014823	i
GO:0014874	i
GO:0019373	i
GO:0006936	ii
GO:0003012	ii
GO:0030049	ii
GO:0033275	ii
GO:0030239	ii
GO:0070252	ii
GO:0006941	ii
GO:0030048	ii
GO:0010927	ii
GO:0055001	ii
GO:0060047	ii
GO:0055002	ii
GO:0003341	ii
GO:0003015	ii
GO:0003009	ii
GO:0045214	ii
GO:0031032	ii
GO:0050879	ii
GO:0050881	ii
GO:0051146	ii
GO:0008016	ii
GO:0035082	ii
GO:0042692	ii
GO:0070286	ii
GO:1903522	ii
GO:0090257	ii
GO:0034762	ii
GO:0034765	ii
GO:0001578	ii
GO:0006937	ii
GO:0048747	ii
GO:0070296	ii
GO:0007517	ii
GO:0060048	ii
GO:0006942	ii
GO:0014706	ii
GO:0060537	ii
GO:0060538	ii
GO:0061337	ii
GO:0007519	ii
GO:1903779	ii
GO:0035637	ii
GO:0043500	ii
GO:0007018	ii
GO:0072511	ii
GO:0070838	ii
GO:0014902	ii
GO:0070588	ii
GO:0010959	ii
GO:0006816	ii
GO:0048741	ii
GO:0055008	ii
GO:0060415	ii
GO:0007015	ii
GO:0043502	ii
GO:0014904	ii
GO:0048644	ii
GO:1903169	ii
GO:0032970	ii
GO:1901019	ii
GO:1904062	ii
GO:0010830	ii
GO:0071688	ii
GO:0031034	ii
GO:0031033	ii
GO:0036159	ii
GO:0001539	ii
GO:2000021	ii
GO:0032412	ii
GO:0060402	ii
GO:0060401	ii
GO:0014888	ii
GO:1901879	ii
GO:0051279	ii
GO:0014808	ii
GO:1903514	ii
GO:0022898	ii
GO:0002026	ii
GO:0032409	ii
GO:0042391	ii
GO:0010880	ii
GO:0043242	ii
GO:0070509	ii
GO:0043462	ii
GO:0072503	ii
GO:0014819	ii
GO:0036158	ii
GO:0043501	ii
GO:0006874	ii
GO:0055074	ii
GO:0002027	ii
GO:0072507	ii
GO:0001895	ii
GO:1901880	ii
GO:0014733	ii
GO:0051494	ii
GO:1902904	ii
GO:1904064	ii
GO:0043270	ii
GO:0034767	ii
GO:0034764	ii
GO:0051899	ii
GO:2001259	ii
GO:0007512	ii
GO:0006936	iii
GO:0003012	iii
GO:0030049	iii
GO:0033275	iii
GO:0030239	iii
GO:0070252	iii
GO:0010927	iii
GO:0006941	iii
GO:0055001	iii
GO:0030048	iii
GO:0055002	iii
GO:0045214	iii
GO:0003009	iii
GO:0051146	iii
GO:0060047	iii
GO:0003015	iii
GO:0031032	iii
GO:0050879	iii
GO:0050881	iii
GO:0042692	iii
GO:0008016	iii
GO:0048747	iii
GO:0071688	iii
GO:1903522	iii
GO:0090257	iii
GO:0031034	iii
GO:0031033	iii
GO:0006937	iii
GO:0014706	iii
GO:0060537	iii
GO:0007517	iii
GO:0070296	iii
GO:0034762	iii
GO:0034765	iii
GO:0006942	iii
GO:0060048	iii
GO:0007519	iii
GO:0060538	iii
GO:1903779	iii
GO:1904062	iii
GO:0055008	iii
GO:0060415	iii
GO:0022898	iii
GO:0010959	iii
GO:1903169	iii
GO:0061337	iii
GO:0032412	iii
GO:0007015	iii
GO:0048644	iii
GO:0070588	iii
GO:0006816	iii
GO:0032409	iii
GO:0048741	iii
GO:0048738	iii
GO:1901019	iii
GO:0035637	iii
GO:0043502	iii
GO:0072511	iii
GO:0014904	iii
GO:0051924	iii
GO:0014902	iii
GO:0055013	iii
GO:0070838	iii
GO:0055006	iii
GO:1901879	iii
GO:0043500	iii
GO:2000021	iii
GO:0051261	iii
GO:0002026	iii
GO:0051209	iii
GO:0051283	iii
GO:0051282	iii
GO:0051208	iii
GO:0043462	iii
GO:0014808	iii
GO:1903514	iii
GO:0002027	iii
GO:0001895	iii
GO:0051279	iii
GO:0010522	iii
GO:0006874	iii
GO:0072503	iii
GO:0014888	iii
GO:0043242	iii
GO:0097553	iii
GO:0055074	iii
GO:0072507	iii
GO:0060402	iii
GO:0060401	iii
GO:0010880	iii
GO:0043501	iii
GO:0043270	iii
GO:1902904	iii
GO:1904064	iii
GO:0070509	iii
GO:0034767	iii
GO:0034764	iii
GO:0042438	iii
GO:0006582	iii
GO:0044550	iii
GO:0032414	iii
GO:0014819	iii
GO:0014733	iii
GO:1901021	iii
GO:1904427	iii
GO:0001580	iii
GO:0050913	iii
GO:0050912	iii
GO:0050909	iii
GO:0019730	iii
GO:0007512	iii
GO:0014874	iii
GO:0048871	iii
GO:0035725	iii
GO:0030049	iv
GO:0033275	iv
GO:0006936	iv
GO:0003012	iv
GO:0070252	iv
GO:0030239	iv
GO:0030048	iv
GO:0006941	iv
GO:0010927	iv
GO:0055001	iv
GO:0045214	iv
GO:0055002	iv
GO:0060047	iv
GO:0003015	iv
GO:0051146	iv
GO:0003009	iv
GO:0031032	iv
GO:0042692	iv
GO:0003341	iv
GO:0050879	iv
GO:0050881	iv
GO:0090257	iv
GO:0008016	iv
GO:1903522	iv
GO:0006937	iv
GO:0014706	iv
GO:0060537	iv
GO:0007517	iv
GO:0060048	iv
GO:0034762	iv
GO:0060538	iv
GO:0034765	iv
GO:0048747	iv
GO:0007519	iv
GO:0070296	iv
GO:0035082	iv
GO:0006942	iv
GO:0070286	iv
GO:0043500	iv
GO:1904062	iv
GO:0014902	iv
GO:0032409	iv
GO:0022898	iv
GO:0001578	iv
GO:0010959	iv
GO:1903169	iv
GO:0061337	iv
GO:0032412	iv
GO:1903779	iv
GO:0048741	iv
GO:0055008	iv
GO:0060415	iv
GO:0043502	iv
GO:0035637	iv
GO:0070588	iv
GO:0014904	iv
GO:0048644	iv
GO:0006816	iv
GO:1901019	iv
GO:0007018	iv
GO:0072511	iv
GO:0051924	iv
GO:0070838	iv
GO:0048738	iv
GO:0055013	iv
GO:0055006	iv
GO:0071688	iv
GO:0031034	iv
GO:0031033	iv
GO:0014808	iv
GO:1903514	iv
GO:0051209	iv
GO:0051283	iv
GO:0051282	iv
GO:0051208	iv
GO:0042391	iv
GO:0002026	iv
GO:1903115	iv
GO:2000021	iv
GO:0097553	iv
GO:0014888	iv
GO:0060402	iv
GO:0060401	iv
GO:0051279	iv
GO:0010522	iv
GO:0006874	iv
GO:0010830	iv
GO:0010880	iv
GO:0055074	iv
GO:0072507	iv
GO:0002027	iv
GO:0043462	iv
GO:0043501	iv
GO:0086010	iv
GO:0043270	iv
GO:0014819	iv
GO:0051899	iv
GO:1904064	iv
GO:0001508	iv
GO:0014733	iv
GO:0034767	iv
GO:0034764	iv
GO:0014823	iv
GO:0007512	iv
GO:0036159	iv
GO:0001895	iv
GO:0014874	iv
GO:0019730	iv

## Sheet: KIRC_Stage
ID	Stages
GO:0051453	i
GO:0030641	i
GO:0006885	i
GO:0030004	i
GO:1902476	i
GO:0006821	i
GO:0015698	i
GO:0098661	i
GO:0098656	i
GO:0055067	i
GO:0007588	i
GO:0048562	i
GO:0090596	i
GO:0015701	i
GO:0048568	i
GO:0044070	i
GO:0001822	i
GO:0001656	i
GO:0002064	i
GO:0007530	i
GO:0072243	i
GO:0072001	i
GO:0001655	i
GO:0042472	i
GO:0042471	i
GO:0035725	i
GO:0072009	i
GO:0072207	i
GO:0072006	i
GO:0048839	i
GO:0043583	i
GO:0072073	i
GO:0072015	i
GO:0030856	i
GO:0035725	ii
GO:0006814	ii
GO:0055067	iii
GO:0030004	iii
GO:0006885	iii
GO:0051453	iii
GO:0030641	iii
GO:1902600	iii
GO:0090383	iii
GO:0090382	iii
GO:0015992	iii
GO:0006818	iii
GO:0007588	iii
GO:0046717	iii
GO:1902476	iii
GO:0015698	iii
GO:0006821	iii
GO:0098661	iii
GO:0098656	iii
GO:0055067	iv
GO:0006885	iv
GO:0030004	iv
GO:0051453	iv
GO:0030641	iv
GO:0015992	iv
GO:0006818	iv
GO:1902600	iv
GO:0090383	iv
GO:1902476	iv
GO:0006821	iv
GO:0098661	iv
GO:0015698	iv
GO:0007588	iv
GO:0015701	iv
GO:0098656	iv
GO:0019730	iv
GO:0006813	iv
GO:0001656	iv
GO:0072006	iv
GO:0046717	iv
GO:0007618	iv
GO:0045745	iv
GO:0072073	iv
GO:0007389	iv
GO:0072009	iv
GO:0072017	iv
GO:0072044	iv
GO:0001822	iv
GO:0072001	iv
GO:0001655	iv
GO:0003014	iv
GO:0090596	iv

## Sheet: KIRP_Stage
ID	Stages
GO:0001525	i
GO:0045765	i
GO:1901342	i
GO:1904018	i
GO:0031032	i
GO:0006936	i
GO:0035725	i
GO:0055067	i
GO:0048562	i
GO:0003012	i
GO:0032835	i
GO:0010927	i
GO:0019932	i
GO:0050891	i
GO:0030104	i
GO:0003158	i
GO:0051453	i
GO:0030641	i
GO:0006814	i
GO:0006885	i
GO:0001822	i
GO:0048568	i
GO:0032970	i
GO:0060537	i
GO:0043114	i
GO:0042692	i
GO:0042472	i
GO:0042471	i
GO:0018108	i
GO:0018212	i
GO:0072001	i
GO:0007588	i
GO:0032102	i
GO:0030239	i
GO:0003018	i
GO:0014706	i
GO:0030195	i
GO:1900047	i
GO:0050819	i
GO:0061045	i
GO:1903035	i
GO:0030193	i
GO:1900046	i
GO:0050818	i
GO:0061041	i
GO:0031532	i
GO:0001655	i
GO:0014065	i
GO:0015698	i
GO:0030004	i
GO:0072010	i
GO:0072012	i
GO:0061437	i
GO:0061440	i
GO:0015701	i
GO:0050673	i
GO:0006813	i
GO:0006939	i
GO:0048015	i
GO:0048017	i
GO:0048483	i
GO:0072006	i
GO:0009755	i
GO:0046683	i
GO:0050730	i
GO:0014068	i
GO:0072001	ii
GO:0001822	ii
GO:0001655	ii
GO:0035239	ii
GO:0061138	ii
GO:0001763	ii
GO:0001656	ii
GO:0072210	ii
GO:0090287	ii
GO:0045444	ii
GO:0060562	ii
GO:0050673	ii
GO:0050678	ii
GO:0048754	ii
GO:0032970	ii
GO:0030324	ii
GO:0050679	ii
GO:0030323	ii
GO:0048608	ii
GO:0061458	ii
GO:0048705	ii
GO:0010632	ii
GO:0018108	ii
GO:0018212	ii
GO:0072006	ii
GO:0060541	ii
GO:0048286	ii
GO:0090132	ii
GO:0090130	ii
GO:0072175	ii
GO:0001667	ii
GO:0010631	ii
GO:0072012	ii
GO:0061437	ii
GO:0061440	ii
GO:0048565	ii
GO:0001654	ii
GO:0051897	ii
GO:0051896	ii
GO:0015850	ii
GO:0072073	ii
GO:0032835	ii
GO:0010634	ii
GO:0050730	ii
GO:0007548	ii
GO:0048260	ii
GO:1903727	ii
GO:0043010	ii
GO:0048545	ii
GO:2000021	ii
GO:0043266	ii
GO:0001823	ii
GO:0010838	ii
GO:0060993	ii
GO:0003338	ii
GO:0043491	ii
GO:0099531	ii
GO:0060047	ii
GO:0003015	ii
GO:0072080	ii
GO:0006869	ii
GO:0010959	ii
GO:0010876	ii
GO:0007389	ii
GO:0043552	ii
GO:1901615	ii
GO:0006813	ii
GO:0072009	ii
GO:0021953	ii
GO:0045834	ii
GO:0006814	ii
GO:0001657	ii
GO:0072163	ii
GO:0072164	ii
GO:0007269	ii
GO:0099643	ii
GO:0061326	ii
GO:0072079	ii
GO:0008016	ii
GO:0003012	ii
GO:0006836	ii
GO:1904062	ii
GO:0051937	ii
GO:0055074	ii
GO:0072507	ii
GO:0050731	ii
GO:0072078	ii
GO:0072088	ii
GO:0072028	ii
GO:0071804	ii
GO:0071805	ii
GO:0002064	ii
GO:0007601	ii
GO:0050953	ii
GO:0015837	ii
GO:0035725	ii
GO:0072215	ii
GO:0030539	ii
GO:0072202	ii
GO:0010644	ii
GO:0006936	ii
GO:0015844	ii
GO:0010817	ii
GO:0072224	ii
GO:0006874	ii
GO:0072503	ii
GO:0061333	ii
GO:0097553	ii
GO:0046660	ii
GO:0030195	ii
GO:1900047	ii
GO:0050819	ii
GO:0001658	ii
GO:0060675	ii
GO:0072171	ii
GO:0061045	ii
GO:1903035	ii
GO:0048871	iii
GO:0072073	iii
GO:0001822	iii
GO:0072001	iii
GO:0001655	iii
GO:0030193	iii
GO:1900046	iii
GO:0050818	iii
GO:0007588	iii
GO:0001656	iii
GO:0050730	iii
GO:0061469	iii
GO:0090287	iii
GO:0044342	iii
GO:0007597	iii
GO:0072243	iii
GO:0050731	iii
GO:0072073	iv
GO:0072006	iv
GO:0006885	iv
GO:0072009	iv
GO:0055067	iv
GO:0061005	iv
GO:0051453	iv
GO:0030641	iv
GO:0001822	iv
GO:0072001	iv
GO:0001656	iv
GO:0001655	iv
GO:0035850	iv
GO:0001763	iv
GO:0007601	iv
GO:0032835	iv
GO:0090383	iv
GO:0060562	iv
GO:1901653	iv
GO:0050953	iv
GO:0072210	iv
GO:0007588	iv
GO:0019932	iv
GO:0061318	iv
GO:0072112	iv
GO:0072311	iv
GO:0072010	iv
GO:0090382	iv
GO:0016054	iv
GO:0046395	iv
GO:0071375	iv
GO:1902476	iv
GO:0030004	iv
GO:0072080	iv
GO:0061138	iv
GO:1902600	iv
GO:0035239	iv
GO:0015698	iv
GO:0061326	iv
GO:0006821	iv
GO:0009063	iv
GO:0051452	iv
GO:0045851	iv
GO:0099132	iv
GO:0099131	iv
GO:0015844	iv
GO:1901606	iv
GO:0045926	iv
GO:0098661	iv
GO:0015988	iv
GO:0015991	iv
GO:0072207	iv
GO:0071804	iv
GO:0071805	iv
GO:0090662	iv
GO:0044282	iv
GO:0006813	iv
GO:0050804	iv
GO:0015992	iv
GO:0006818	iv
GO:0015701	iv
GO:0001658	iv
GO:0001505	iv
GO:0006836	iv
GO:0035150	iv
GO:0072202	iv

## Sheet: LUAD_Stage
ID	Stages
GO:0015671	i
GO:0015669	i
GO:0042744	i
GO:0042743	i
GO:0015701	i
GO:0072593	i
GO:0015671	ii
GO:0015669	ii
GO:0042744	ii
GO:0015701	ii
GO:0042743	ii
GO:0042391	iii
GO:0015671	iii
GO:0015669	iii
GO:0042744	iii
GO:0090066	iii
GO:0050805	iii
GO:0015701	iii
GO:0042743	iii
GO:0042310	iii
GO:0015701	iv
GO:0015671	iv
GO:0015669	iv
GO:0042744	iv
GO:0042743	iv

## Sheet: STAD_Stage
ID	Stages
GO:0006958	i
GO:0002455	i
GO:0006956	i
GO:0072376	i
GO:0016064	i
GO:0019724	i
GO:0006959	i
GO:0030449	i
GO:2000257	i
GO:0002920	i
GO:0002449	i
GO:0006909	i
GO:0002460	i
GO:0002433	i
GO:0038096	i
GO:0002673	i
GO:0038094	i
GO:0002431	i
GO:0070613	i
GO:1903317	i
GO:0002429	i
GO:0002526	i
GO:0038095	i
GO:0002768	i
GO:0006898	i
GO:0038093	i
GO:0016485	i
GO:0006910	i
GO:0002377	i
GO:0050727	i
GO:0051604	i
GO:0050900	i
GO:0006911	i
GO:0050853	i
GO:0002697	i
GO:0099024	i
GO:0010324	i
GO:0002440	i
GO:0050871	i
GO:0050864	i
GO:0008037	i
GO:0042742	i
GO:0070268	i
GO:0042113	i
GO:0031424	i
GO:0050851	i
GO:0030216	i
GO:0051251	i
GO:0043588	i
GO:0002696	i
GO:0009913	i
GO:0050867	i
GO:0051249	i
GO:0008544	i
GO:0006936	i
GO:0003012	i
GO:0018149	i
GO:0008016	i
GO:0060047	i
GO:0035637	i
GO:0051051	i
GO:0019731	i
GO:0019730	i
GO:0061337	i
GO:1903779	i
GO:0034378	i
GO:0070268	ii
GO:0006958	ii
GO:0030216	ii
GO:0002455	ii
GO:0006956	ii
GO:0006959	ii
GO:0043588	ii
GO:0031424	ii
GO:0008544	ii
GO:0072376	ii
GO:0009913	ii
GO:0016064	ii
GO:0019724	ii
GO:0002920	ii
GO:0018149	ii
GO:0030449	ii
GO:2000257	ii
GO:0002431	ii
GO:0002673	ii
GO:0002377	ii
GO:0002449	ii
GO:0002460	ii
GO:0002433	ii
GO:0038096	ii
GO:0002526	ii
GO:0038094	ii
GO:0006898	ii
GO:0002440	ii
GO:0006909	ii
GO:0070613	ii
GO:1903317	ii
GO:0038095	ii
GO:0002429	ii
GO:0050727	ii
GO:0050900	ii
GO:0002768	ii
GO:0016485	ii
GO:0038093	ii
GO:0002697	ii
GO:0051604	ii
GO:0006936	ii
GO:0006910	ii
GO:0006911	ii
GO:0099024	ii
GO:0050853	ii
GO:0010324	ii
GO:0050871	ii
GO:0050864	ii
GO:0010951	ii
GO:0052548	ii
GO:0008037	ii
GO:0010466	ii
GO:0052547	ii
GO:0034370	ii
GO:0051346	ii
GO:0042742	ii
GO:0034378	ii
GO:0034377	ii
GO:0033344	ii
GO:0019433	ii
GO:0046461	ii
GO:0046464	ii
GO:0046503	ii
GO:0019731	ii
GO:0050832	ii
GO:0070268	iii
GO:0006958	iii
GO:0030216	iii
GO:0006959	iii
GO:0006956	iii
GO:0002455	iii
GO:0008544	iii
GO:0043588	iii
GO:0072376	iii
GO:0009913	iii
GO:0031424	iii
GO:0016064	iii
GO:0019724	iii
GO:0002920	iii
GO:0030449	iii
GO:2000257	iii
GO:0002431	iii
GO:0002673	iii
GO:0002377	iii
GO:0002449	iii
GO:0002433	iii
GO:0038096	iii
GO:0002526	iii
GO:0038094	iii
GO:0006898	iii
GO:0002440	iii
GO:0002460	iii
GO:0018149	iii
GO:0070613	iii
GO:1903317	iii
GO:0038095	iii
GO:0006909	iii
GO:0050727	iii
GO:0016485	iii
GO:0050900	iii
GO:0002429	iii
GO:0038093	iii
GO:0051604	iii
GO:0002768	iii
GO:0002697	iii
GO:0006910	iii
GO:0006936	iii
GO:0003012	iii
GO:0006911	iii
GO:0099024	iii
GO:0050853	iii
GO:0010324	iii
GO:0090257	iii
GO:0035637	iii
GO:0006937	iii
GO:0006813	iii
GO:0042742	iii
GO:1903779	iii
GO:0010951	iii
GO:0010466	iii
GO:0045861	iii
GO:0052548	iii
GO:0051346	iii
GO:0034370	iii
GO:0052547	iii
GO:0034378	iii
GO:0034377	iii
GO:0033344	iii
GO:0006814	iii
GO:0042632	iii
GO:0055092	iii
GO:0019433	iii
GO:0046461	iii
GO:0046464	iii
GO:0046503	iii
GO:0019731	iii
GO:0019730	iii
GO:0098810	iii
GO:0044241	iii
GO:0070268	iv
GO:0030216	iv
GO:0031424	iv
GO:0043588	iv
GO:0009913	iv
GO:0006936	iv
GO:0008544	iv
GO:0003012	iv
GO:0018149	iv
GO:0006959	iv
GO:0090257	iv
GO:0002920	iv
GO:0006958	iv
GO:0002377	iv
GO:0006956	iv
GO:0030449	iv
GO:2000257	iv
GO:0002455	iv
GO:0002440	iv
GO:0002673	iv
GO:0072376	iv
GO:0002526	iv
GO:0006898	iv
GO:0050727	iv
GO:0070613	iv
GO:1903317	iv
GO:0002433	iv
GO:0038096	iv
GO:0038094	iv
GO:0002431	iv
GO:0016064	iv
GO:0019724	iv
GO:0016485	iv
GO:0002449	iv
GO:0038095	iv
GO:0006939	iv
GO:0006937	iv
GO:0031032	iv
GO:0051146	iv
GO:0010959	iv
GO:0034765	iv
GO:0034762	iv
GO:0055002	iv
GO:0042692	iv
GO:0055001	iv
GO:0008016	iv
GO:0060537	iv
GO:0060047	iv
GO:0003015	iv
GO:0030239	iv
GO:0010927	iv
GO:0006940	iv
GO:0032412	iv
GO:0022898	iv
GO:0007517	iv
GO:0034370	iv
GO:1903522	iv
GO:1904062	iv
GO:0051924	iv
GO:1901019	iv
GO:0034378	iv
GO:0014706	iv
GO:0071804	iv
GO:0071805	iv
GO:0007626	iv
GO:0010522	iv
GO:0060314	iv
GO:0034377	iv
GO:0010880	iv
GO:0065005	iv
GO:0014808	iv
GO:1903514	iv
GO:0070252	iv
GO:0030048	iv
GO:2000021	iv
GO:0031069	iv
GO:0019433	iv
GO:0046461	iv
GO:0046464	iv
GO:0071827	iv
GO:0071825	iv
GO:0019722	iv
GO:0006813	iv
GO:0006941	iv
GO:0051480	iv
GO:0001523	iv
GO:0016101	iv
GO:0045214	iv
GO:0033344	iv
GO:0046503	iv
GO:0055075	iv
GO:0045104	iv
GO:0045103	iv
GO:0060048	iv
GO:0035725	iv
GO:0009812	iv
GO:0042391	iv
GO:0042632	iv
GO:0055092	iv
GO:0007204	iv

## Sheet: THCA_Stage
ID	Stages
GO:0006027	i
GO:0006026	i
GO:0051249	ii
GO:0002429	ii
GO:0002696	ii
GO:0002768	ii
GO:0051251	ii
GO:0042110	ii
GO:0050867	ii
GO:0031294	ii
GO:0022407	ii
GO:0006959	ii
GO:0050863	ii
GO:0031295	ii
GO:1903037	ii
GO:0002449	ii
GO:0002460	ii
GO:0050851	ii
GO:1903039	ii
GO:0022409	ii
GO:0050870	ii
GO:0007159	ii
GO:0002377	ii
GO:0045785	ii
GO:0030098	ii
GO:0016064	ii
GO:0019724	ii
GO:0002440	ii
GO:0002455	ii
GO:0002521	ii
GO:0072376	ii
GO:0050853	ii
GO:0042113	ii
GO:0006956	ii
GO:0002697	ii
GO:0006958	ii
GO:0030217	ii
GO:0050852	ii
GO:0006909	ii
GO:0008037	ii
GO:0001819	ii
GO:0002431	ii
GO:0002433	ii
GO:0038096	ii
GO:0038094	ii
GO:0038093	ii
GO:0038095	ii
GO:0045058	ii
GO:0050864	ii
GO:0050900	ii
GO:0046631	ii
GO:0006911	ii
GO:0099024	ii
GO:0010324	ii
GO:0050871	ii
GO:0046651	ii
GO:0032943	ii
GO:0070661	ii
GO:0002920	ii
GO:0002706	ii
GO:0002703	ii
GO:0030449	ii
GO:2000257	ii
GO:0006910	ii
GO:0046632	ii
GO:0002708	ii
GO:0002705	ii
GO:0032609	ii
GO:0031341	ii
GO:0042102	ii
GO:0050854	ii
GO:0007204	ii
GO:0070613	ii
GO:1903317	ii
GO:0031349	ii
GO:0032655	ii
GO:0032615	ii
GO:0002699	ii
GO:0050671	ii
GO:0032946	ii
GO:0070665	ii
GO:0031343	ii
GO:0002673	ii
GO:0042129	ii
GO:0042098	ii
GO:0002526	ii
GO:0043368	ii
GO:0032633	ii
GO:0051480	ii
GO:0050670	ii
GO:0032944	ii
GO:0070663	ii
GO:0001910	ii
GO:0001909	ii
GO:0002285	ii
GO:0043383	ii
GO:0045061	ii
GO:0001906	ii
GO:0016485	ii
GO:0051604	ii
GO:0042742	ii
GO:0002287	ii
GO:0002293	ii
GO:0002292	ii
GO:0002286	ii
GO:0048872	ii
GO:0032649	ii
GO:0001912	ii
GO:0006898	ii
GO:0006874	ii
GO:0055074	ii
GO:0072503	ii
GO:0045088	ii
GO:0050857	ii
GO:0006968	ii
GO:0070098	ii
GO:0050727	ii
GO:0045089	ii
GO:0002683	ii
GO:0072507	ii
GO:0033077	ii
GO:0060402	ii
GO:0060401	ii
GO:0050856	ii
GO:0002294	ii
GO:0042100	ii
GO:0050663	ii
GO:0045060	ii
GO:0048535	ii
GO:0045954	ii
GO:0002717	ii
GO:0042269	ii
GO:0002715	ii
GO:0042267	ii
GO:0002228	ii
GO:0032729	ii
GO:0051209	ii
GO:0051283	ii
GO:0051282	ii
GO:0051208	ii
GO:0097553	ii
GO:0002863	ii
GO:0043374	ii
GO:0036037	ii
GO:0051897	ii
GO:0051896	ii
GO:0043491	ii
GO:0002819	ii
GO:0043367	ii
GO:0035710	ii
GO:0042035	ii
GO:0042089	ii
GO:0042107	ii
GO:0032735	ii
GO:0050850	ii
GO:0006027	ii
GO:0006026	ii
GO:0051250	ii
GO:0032103	ii
GO:0050707	ii
GO:0042093	ii
GO:0050862	ii
GO:0015671	ii
GO:0015669	ii
GO:0002861	ii
GO:0032673	ii
GO:0042113	iii
GO:0042100	iii
GO:0002768	iii
GO:0050853	iii
GO:0050855	iii
GO:0050900	iii
GO:0055067	iii
GO:0015711	iii
GO:0002460	iii
GO:0006959	iii
GO:0002920	iii
GO:0046651	iii
GO:0032943	iii
GO:0030595	iii
GO:0070661	iii
GO:0015701	iii
GO:0060326	iii
GO:0016064	iii
GO:0019724	iii
GO:0007588	iii
GO:0002455	iv
GO:0006956	iv
GO:0072376	iv
GO:0006958	iv
GO:0006959	iv
GO:0016064	iv
GO:0019724	iv
GO:0002429	iv
GO:0002768	iv
GO:0050853	iv
GO:0002920	iv
GO:0030449	iv
GO:2000257	iv
GO:0002460	iv
GO:0002673	iv
GO:0002431	iv
GO:0042113	iv
GO:0002433	iv
GO:0038096	iv
GO:0038094	iv
GO:0002449	iv
GO:0006898	iv
GO:0070613	iv
GO:1903317	iv
GO:0006909	iv
GO:0038093	iv
GO:0038095	iv
GO:0002526	iv
GO:0050864	iv
GO:0050900	iv
GO:0050851	iv
GO:0016485	iv
GO:0002377	iv
GO:0050727	iv
GO:0002440	iv
GO:0051249	iv
GO:0042100	iv
GO:0002696	iv
GO:0050867	iv
GO:0050871	iv
GO:0006911	iv
GO:0099024	iv
GO:0010324	iv
GO:0051251	iv
GO:0006910	iv
GO:0008037	iv
GO:0071294	iv
GO:0007204	iv
GO:0051480	iv
GO:0050796	iv
GO:0090276	iv
GO:0030073	iv
GO:0006874	iv
GO:0055074	iv
GO:0072503	iv
GO:0055067	iv
GO:0046883	iv
GO:0072507	iv
