# Supplementary material for: Co-expression based cancer staging and application
Source: Sci Rep. 2020 Jun 30;10:10624. doi: 10.1038/s41598-020-67476-7 (PMC7327081; doi:10.1038/s41598-020-67476-7)
Supplement: Supplementary file 8 — Supplementary file8 [file 41598_2020_67476_MOESM8_ESM.xlsx]

## Sheet: BRCA_Stage
ID	Description	GPRatio	BgRatio	pvalue	p.adjust	GOcount	Stages
GO:0031497	chromatin assembly	53/1035	30247/2186140.5	1.66533e-15	5.45226e-15	53	ii
GO:0006333	chromatin assembly or disassembly	53/1035	30247/2186140.5	1.66533e-15	5.45226e-15	53	ii
GO:0006342	chromatin silencing	31/136	32086/1184260.5	0	0	31	iv
GO:0007059	chromosome segregation	702/1128	23584/1561144.5	0	0	702	i
GO:0051304	chromosome separation	66/91	23584/1561144.5	0	0	66	i
GO:0071103	DNA conformation change	82/1225	23584/1561144.5	0	0	82	i
GO:0006323	DNA packaging	71/1128	23584/1561144.5	0	0	71	i
GO:0016042	lipid catabolic process	96/496	23584/1561144.5	0	0	96	i
GO:0045132	meiotic chromosome segregation	28/91	23584/1561144.5	0	0	28	i
GO:0044784	metaphase/anaphase transition of cell cycle	45/55	23584/1561144.5	0	0	45	i
GO:0007091	metaphase/anaphase transition of mitotic cell cycle	45/55	23584/1561144.5	0	0	45	i
GO:1902850	microtubule cytoskeleton organization involved in mitosis	108/153	23584/1561144.5	0	0	108	i
GO:0140014	mitotic nuclear division	491/666	23584/1561144.5	0	0	491	i
GO:0000070	mitotic sister chromatid segregation	276/378	23584/1561144.5	0	0	276	i
GO:0051306	mitotic sister chromatid separation	55/78	23584/1561144.5	0	0	55	i
GO:0007052	mitotic spindle organization	76/105	23584/1561144.5	0	0	76	i
GO:0051985	negative regulation of chromosome segregation	28/45	23584/1561144.5	0	0	28	i
GO:1905819	negative regulation of chromosome separation	21/36	23584/1561144.5	0	0	21	i
GO:0045814	negative regulation of gene expression, epigenetic	25/190	27346/1268824.5	7.91478e-13	2.00268e-12	25	iii
GO:0033048	negative regulation of mitotic sister chromatid segregation	21/36	23584/1561144.5	0	0	21	i
GO:2000816	negative regulation of mitotic sister chromatid separation	21/36	23584/1561144.5	0	0	21	i
GO:0051048	negative regulation of secretion	22/325	23584/1561144.5	8.47048e-09	1.93016e-08	22	i
GO:0033046	negative regulation of sister chromatid segregation	28/45	23584/1561144.5	0	0	28	i
GO:0098813	nuclear chromosome segregation	558/903	23584/1561144.5	0	0	558	i
GO:0000280	nuclear division	555/946	23584/1561144.5	0	0	555	i
GO:0006334	nucleosome assembly	53/946	30247/2186140.5	0	0	53	ii
GO:0034728	nucleosome organization	53/946	30247/2186140.5	0	0	53	ii
GO:0048285	organelle fission	555/946	23584/1561144.5	0	0	555	i
GO:0034502	protein localization to chromosome	33/78	23584/1561144.5	0	0	33	i
GO:0071459	protein localization to chromosome, centromeric region	19/28	23584/1561144.5	0	0	19	i
GO:0034501	protein localization to kinetochore	15/21	23584/1561144.5	0	0	15	i
GO:0065004	protein-DNA complex assembly	85/1176	30247/2186140.5	0	0	85	ii
GO:0071824	protein-DNA complex subunit organization	85/1176	30247/2186140.5	0	0	85	ii
GO:0051983	regulation of chromosome segregation	136/190	23584/1561144.5	0	0	136	i
GO:1905818	regulation of chromosome separation	55/78	23584/1561144.5	0	0	55	i
GO:1902099	regulation of metaphase/anaphase transition of cell cycle	45/55	23584/1561144.5	0	0	45	i
GO:0030071	regulation of mitotic metaphase/anaphase transition	45/55	23584/1561144.5	0	0	45	i
GO:0007088	regulation of mitotic nuclear division	171/231	23584/1561144.5	0	0	171	i
GO:0033047	regulation of mitotic sister chromatid segregation	55/78	23584/1561144.5	0	0	55	i
GO:0010965	regulation of mitotic sister chromatid separation	55/78	23584/1561144.5	0	0	55	i
GO:0051783	regulation of nuclear division	190/276	23584/1561144.5	0	0	190	i
GO:0033045	regulation of sister chromatid segregation	78/105	23584/1561144.5	0	0	78	i
GO:0007062	sister chromatid cohesion	169/253	23584/1561144.5	0	0	169	i
GO:0000819	sister chromatid segregation	525/780	23584/1561144.5	0	0	525	i
GO:0032200	telomere organization	26/378	30247/2186140.5	4.43823e-11	1.27034e-10	26	ii
GO:0008608	attachment of spindle microtubules to kinetochore	40/55	30247/2186140.5	0	0	40	ii
GO:0000075	cell cycle checkpoint	245/496	30247/2186140.5	0	0	245	ii
GO:0050000	chromosome localization	85/153	30247/2186140.5	0	0	85	ii
GO:0051303	establishment of chromosome localization	85/153	30247/2186140.5	0	0	85	ii
GO:0051321	meiotic cell cycle	280/820	30247/2186140.5	0	0	280	ii
GO:1903046	meiotic cell cycle process	172/496	30247/2186140.5	0	0	172	ii
GO:0140013	meiotic nuclear division	172/465	30247/2186140.5	0	0	172	ii
GO:0051310	metaphase plate congression	72/105	30247/2186140.5	0	0	72	ii
GO:0007093	mitotic cell cycle checkpoint	172/325	30247/2186140.5	0	0	172	ii
GO:0007094	mitotic spindle assembly checkpoint	35/45	30247/2186140.5	0	0	35	ii
GO:0071174	mitotic spindle checkpoint	35/45	30247/2186140.5	0	0	35	ii
GO:1902100	negative regulation of metaphase/anaphase transition of cell cycle	35/45	30247/2186140.5	0	0	35	ii
GO:0045841	negative regulation of mitotic metaphase/anaphase transition	35/45	30247/2186140.5	0	0	35	ii
GO:0045839	negative regulation of mitotic nuclear division	44/66	30247/2186140.5	0	0	44	ii
GO:0051784	negative regulation of nuclear division	52/105	30247/2186140.5	0	0	52	ii
GO:0090068	positive regulation of cell cycle process	219/630	30247/2186140.5	0	0	219	ii
GO:0071173	spindle assembly checkpoint	35/45	30247/2186140.5	0	0	35	ii
GO:0031577	spindle checkpoint	44/55	30247/2186140.5	0	0	44	ii
GO:0007051	spindle organization	195/276	30247/2186140.5	0	0	195	ii
GO:0000910	cytokinesis	99/190	27346/1268824.5	0	0	99	iii
GO:0051051	negative regulation of transport	69/1431	32086/1184260.5	5.33738e-06	1.56118e-05	69	iv
GO:1901989	positive regulation of cell cycle phase transition	53/105	32086/1184260.5	0	0	53	iv
GO:1901987	regulation of cell cycle phase transition	441/1081	32086/1184260.5	0	0	441	iv
GO:1901990	regulation of mitotic cell cycle phase transition	411/990	32086/1184260.5	0	0	411	iv

## Sheet: COAD_Stage
ID	Description	GPRatio	BgRatio	pvalue	p.adjust	GOcount	Stages
GO:0061564	axon development	354/1378	49588/2993904.5	0	0	354	i
GO:0055074	calcium ion homeostasis	209/1653	49588/2993904.5	0	0	209	i
GO:0006874	cellular calcium ion homeostasis	209/1653	49588/2993904.5	0	0	209	i
GO:0072503	cellular divalent inorganic cation homeostasis	209/1711	49588/2993904.5	0	0	209	i
GO:0071804	cellular potassium ion transport	141/351	49588/2993904.5	0	0	141	i
GO:0006956	complement activation	67/253	49588/2993904.5	0	0	67	i
GO:0006958	complement activation, classical pathway	65/190	49588/2993904.5	0	0	65	i
GO:0072507	divalent inorganic cation homeostasis	226/1770	49588/2993904.5	0	0	226	i
GO:0006959	humoral immune response	84/1081	49588/2993904.5	0	0	84	i
GO:0002455	humoral immune response mediated by circulating immunoglobulin	65/210	49588/2993904.5	0	0	65	i
GO:0006936	muscle contraction	567/1830	49588/2993904.5	0	0	567	i
GO:0003012	muscle system process	602/2080	49588/2993904.5	0	0	602	i
GO:0043270	positive regulation of ion transport	116/595	49588/2993904.5	0	0	116	i
GO:0071805	potassium ion transmembrane transport	141/351	49588/2993904.5	0	0	141	i
GO:0072376	protein activation cascade	70/351	49588/2993904.5	0	0	70	i
GO:0051480	regulation of cytosolic calcium ion concentration	158/1035	49588/2993904.5	0	0	158	i
GO:0042391	regulation of membrane potential	434/1431	49588/2993904.5	0	0	434	i
GO:0010959	regulation of metal ion transport	253/1035	49588/2993904.5	0	0	253	i
GO:0006937	regulation of muscle contraction	116/435	49588/2993904.5	0	0	116	i
GO:0090257	regulation of muscle system process	148/528	49588/2993904.5	0	0	148	i
GO:0060078	regulation of postsynaptic membrane potential	72/231	49588/2993904.5	0	0	72	i
GO:0006939	smooth muscle contraction	39/276	49588/2993904.5	0	0	39	i
GO:0010043	response to zinc ion	12/55	30163/1479200	1.00184e-09	4.25782e-09	12	iv
GO:0002460	adaptive immune response based on somatic recombination of immune receptors built from immunoglobulin superfamily domains	501/1081	30163/1479200	0	0	501	iv
GO:0019724	B cell mediated immunity	470/861	30163/1479200	0	0	470	iv
GO:0071294	cellular response to zinc ion	10/21	30163/1479200	3.56426e-12	1.73121e-11	10	iv
GO:0016064	immunoglobulin mediated immune response	470/861	30163/1479200	0	0	470	iv
GO:0002449	lymphocyte mediated immunity	470/1128	30163/1479200	0	0	470	iv
GO:0006909	phagocytosis	470/1081	30163/1479200	0	0	470	iv

## Sheet: HNSC_Stage
ID	Description	GPRatio	BgRatio	pvalue	p.adjust	GOcount	Stages
GO:0030048	actin filament-based movement	336/528	63235/873842	0	0	336	i
GO:0070252	actin-mediated cell contraction	336/465	63235/873842	0	0	336	i
GO:0033275	actin-myosin filament sliding	237/276	63235/873842	0	0	237	i
GO:0031032	actomyosin structure organization	264/435	63235/873842	0	0	264	i
GO:0055074	calcium ion homeostasis	103/1035	56505/1394450	2.22045e-16	4.05231e-16	103	iv
GO:0060048	cardiac muscle contraction	130/231	63235/873842	0	0	130	i
GO:0055008	cardiac muscle tissue morphogenesis	45/78	63235/873842	0	0	45	i
GO:0010927	cellular component assembly involved in morphogenesis	233/351	63235/873842	0	0	233	i
GO:0030574	collagen catabolic process	48/253	56505/1394450	0	0	48	iv
GO:0030199	collagen fibril organization	28/91	56505/1394450	0	0	28	iv
GO:0032963	collagen metabolic process	48/300	56505/1394450	6.66134e-16	1.13088e-15	48	iv
GO:0072507	divalent inorganic cation homeostasis	141/1326	68510/1195058	3.0469e-12	6.05836e-12	141	iii
GO:0030198	extracellular matrix organization	133/1275	56505/1394450	0	0	133	iv
GO:0043062	extracellular structure organization	133/1275	56505/1394450	0	0	133	iv
GO:0060047	heart contraction	407/861	63235/873842	0	0	407	i
GO:0003015	heart process	407/861	63235/873842	0	0	407	i
GO:0044236	multicellular organism metabolic process	48/406	56505/1394450	5.63156e-11	8.47637e-11	48	iv
GO:0044243	multicellular organismal catabolic process	48/253	56505/1394450	0	0	48	iv
GO:0044259	multicellular organismal macromolecule metabolic process	48/300	56505/1394450	6.66134e-16	1.13088e-15	48	iv
GO:0050879	multicellular organismal movement	96/153	63235/873842	0	0	96	i
GO:0055001	muscle cell development	379/595	63235/873842	0	0	379	i
GO:0042692	muscle cell differentiation	615/1326	63235/873842	0	0	615	i
GO:0006936	muscle contraction	1441/2346	63235/873842	0	0	1441	i
GO:0048747	muscle fiber development	66/120	63235/873842	0	0	66	i
GO:0030049	muscle filament sliding	237/276	63235/873842	0	0	237	i
GO:0007517	muscle organ development	512/1326	63235/873842	0	0	512	i
GO:0003012	muscle system process	1673/2926	63235/873842	0	0	1673	i
GO:0060537	muscle tissue development	481/1431	63235/873842	0	0	481	i
GO:0060415	muscle tissue morphogenesis	46/105	63235/873842	0	0	46	i
GO:0050881	musculoskeletal movement	96/153	63235/873842	0	0	96	i
GO:0030239	myofibril assembly	232/300	63235/873842	0	0	232	i
GO:0031034	myosin filament assembly	21/36	68510/1195058	0	0	21	iii
GO:0031033	myosin filament organization	21/36	68510/1195058	0	0	21	iii
GO:0014904	myotube cell development	15/36	63235/873842	9.98395e-09	1.9529e-08	15	i
GO:0014902	myotube differentiation	63/190	63235/873842	0	0	63	i
GO:1904064	positive regulation of cation transmembrane transport	38/190	60435/1110050	3.36153e-12	5.88268e-12	38	ii
GO:0034767	positive regulation of ion transmembrane transport	41/210	60435/1110050	1.10889e-12	2.02493e-12	41	ii
GO:0034764	positive regulation of transmembrane transport	41/210	60435/1110050	1.10889e-12	2.02493e-12	41	ii
GO:1903522	regulation of blood circulation	243/666	63235/873842	0	0	243	i
GO:1903779	regulation of cardiac conduction	47/91	63235/873842	0	0	47	i
GO:1904062	regulation of cation transmembrane transport	137/630	63235/873842	0	0	137	i
GO:0008016	regulation of heart contraction	219/561	63235/873842	0	0	219	i
GO:0034765	regulation of ion transmembrane transport	296/1326	63235/873842	0	0	296	i
GO:0032412	regulation of ion transmembrane transporter activity	102/351	63235/873842	0	0	102	i
GO:0010959	regulation of metal ion transport	168/741	63235/873842	0	0	168	i
GO:0006937	regulation of muscle contraction	176/300	63235/873842	0	0	176	i
GO:0090257	regulation of muscle system process	291/496	63235/873842	0	0	291	i
GO:0051279	regulation of release of sequestered calcium ion into cytosol	28/78	63235/873842	3.82583e-13	9.59151e-13	28	i
GO:0010880	regulation of release of sequestered calcium ion into cytosol by sarcoplasmic reticulum	21/36	60435/1110050	0	0	21	ii
GO:0014733	regulation of skeletal muscle adaptation	11/21	56505/1394450	1.16786e-10	1.73987e-10	11	iv
GO:0014819	regulation of skeletal muscle contraction	14/21	60435/1110050	1.62093e-13	3.05972e-13	14	ii
GO:0006942	regulation of striated muscle contraction	79/136	63235/873842	0	0	79	i
GO:0002026	regulation of the force of heart contraction	15/28	56505/1394450	2.95319e-14	4.84456e-14	15	iv
GO:0034762	regulation of transmembrane transport	298/1378	63235/873842	0	0	298	i
GO:0022898	regulation of transmembrane transporter activity	103/378	63235/873842	0	0	103	i
GO:0032409	regulation of transporter activity	105/435	63235/873842	0	0	105	i
GO:1903514	release of sequestered calcium ion into cytosol by endoplasmic reticulum	28/45	60435/1110050	0	0	28	ii
GO:0014808	release of sequestered calcium ion into cytosol by sarcoplasmic reticulum	28/45	60435/1110050	0	0	28	ii
GO:0001895	retina homeostasis	34/105	68510/1195058	0	0	34	iii
GO:0045214	sarcomere organization	136/153	63235/873842	0	0	136	i
GO:0070296	sarcoplasmic reticulum calcium ion transport	28/45	63235/873842	0	0	28	i
GO:0043501	skeletal muscle adaptation	29/66	60435/1110050	0	0	29	ii
GO:0003009	skeletal muscle contraction	95/136	63235/873842	0	0	95	i
GO:0048741	skeletal muscle fiber development	15/36	63235/873842	9.98395e-09	1.9529e-08	15	i
GO:0060538	skeletal muscle organ development	144/406	63235/873842	0	0	144	i
GO:0007519	skeletal muscle tissue development	144/378	63235/873842	0	0	144	i
GO:0014888	striated muscle adaptation	37/91	63235/873842	0	0	37	i
GO:0055002	striated muscle cell development	326/528	63235/873842	0	0	326	i
GO:0051146	striated muscle cell differentiation	463/1035	63235/873842	0	0	463	i
GO:0006941	striated muscle contraction	501/741	63235/873842	0	0	501	i
GO:0071688	striated muscle myosin thick filament assembly	21/36	68510/1195058	0	0	21	iii
GO:0014706	striated muscle tissue development	477/1326	63235/873842	0	0	477	i
GO:0061337	cardiac conduction	120/210	60435/1110050	0	0	120	ii
GO:0035637	multicellular organismal signaling	153/351	60435/1110050	0	0	153	ii
GO:0043500	muscle adaptation	60/120	60435/1110050	0	0	60	ii
GO:0043270	positive regulation of ion transport	67/406	60435/1110050	8.88178e-16	1.93784e-15	67	ii
GO:0002027	regulation of heart rate	46/105	60435/1110050	0	0	46	ii
GO:0035987	endodermal cell differentiation	6/55	56505/1394450	0.0235144	0.0309289	6	iv

## Sheet: KIRC_Stage
ID	Description	GPRatio	BgRatio	pvalue	p.adjust	GOcount	Stages

## Sheet: KIRP_Stage
ID	Description	GPRatio	BgRatio	pvalue	p.adjust	GOcount	Stages
GO:0001822	kidney development	123/861	46546/945312.5	0	0	123	i
GO:0072001	renal system development	134/946	46546/945312.5	0	0	134	i
GO:0001655	urogenital system development	156/1225	46546/945312.5	0	0	156	i

## Sheet: LUAD_Stage
ID	Description	GPRatio	BgRatio	pvalue	p.adjust	GOcount	Stages
GO:0015669	gas transport	3/21	4811/2274844.5	1.22192e-05	8.08993e-05	3	i
GO:0051321	meiotic cell cycle	41/378	4811/2274844.5	0	0	41	i
GO:0015671	oxygen transport	3/21	4811/2274844.5	1.22192e-05	8.08993e-05	3	i
GO:0000070	mitotic sister chromatid segregation	182/276	4327/1062882	0	0	182	ii
GO:0000819	sister chromatid segregation	293/496	4327/1062882	0	0	293	ii

## Sheet: STAD_Stage
ID	Description	GPRatio	BgRatio	pvalue	p.adjust	GOcount	Stages
GO:0002526	acute inflammatory response	983/2278	61355/901824.5	0	0	983	i
GO:0019724	B cell mediated immunity	1988/2485	61355/901824.5	0	0	1988	i
GO:0034378	chylomicron assembly	10/21	64310/945312.5	3.71638e-07	8.54767e-07	10	ii
GO:0006956	complement activation	1991/2926	61355/901824.5	0	0	1991	i
GO:0006958	complement activation, classical pathway	1988/2278	61355/901824.5	0	0	1988	i
GO:0070268	cornification	163/300	61355/901824.5	0	0	163	i
GO:0009913	epidermal cell differentiation	299/666	61355/901824.5	0	0	299	i
GO:0008544	epidermis development	351/946	61355/901824.5	0	0	351	i
GO:0002431	Fc receptor mediated stimulatory signaling pathway	972/1035	61355/901824.5	0	0	972	i
GO:0038095	Fc-epsilon receptor signaling pathway	929/990	61355/901824.5	0	0	929	i
GO:0038094	Fc-gamma receptor signaling pathway	972/1035	61355/901824.5	0	0	972	i
GO:0038096	Fc-gamma receptor signaling pathway involved in phagocytosis	972/1035	61355/901824.5	0	0	972	i
GO:0006959	humoral immune response	2130/4371	61355/901824.5	0	0	2130	i
GO:0002455	humoral immune response mediated by circulating immunoglobulin	1988/2415	61355/901824.5	0	0	1988	i
GO:0002433	immune response-regulating cell surface receptor signaling pathway involved in phagocytosis	972/1035	61355/901824.5	0	0	972	i
GO:0016064	immunoglobulin mediated immune response	1988/2485	61355/901824.5	0	0	1988	i
GO:0002377	immunoglobulin production	517/630	61355/901824.5	0	0	517	i
GO:0031424	keratinization	230/496	61355/901824.5	0	0	230	i
GO:0030216	keratinocyte differentiation	299/630	61355/901824.5	0	0	299	i
GO:0002449	lymphocyte mediated immunity	1988/2775	61355/901824.5	0	0	1988	i
GO:0018149	peptide cross-linking	50/91	61355/901824.5	0	0	50	i
GO:0002440	production of molecular mediator of immune response	517/703	61355/901824.5	0	0	517	i
GO:0072376	protein activation cascade	1994/3321	61355/901824.5	0	0	1994	i
GO:0016485	protein processing	980/2211	61355/901824.5	0	0	980	i
GO:0006898	receptor-mediated endocytosis	1195/2628	61355/901824.5	0	0	1195	i
GO:0002673	regulation of acute inflammatory response	976/1596	61355/901824.5	0	0	976	i
GO:0030449	regulation of complement activation	975/1485	61355/901824.5	0	0	975	i
GO:0002920	regulation of humoral immune response	975/1653	61355/901824.5	0	0	975	i
GO:0050727	regulation of inflammatory response	1022/2211	61355/901824.5	0	0	1022	i
GO:2000257	regulation of protein activation cascade	975/1540	61355/901824.5	0	0	975	i
GO:1903317	regulation of protein maturation	978/1830	61355/901824.5	0	0	978	i
GO:0070613	regulation of protein processing	978/1830	61355/901824.5	0	0	978	i
GO:0043588	skin development	378/946	61355/901824.5	0	0	378	i
GO:0006936	muscle contraction	161/666	66740/899140.5	0	0	161	iii

## Sheet: THCA_Stage
ID	Description	GPRatio	BgRatio	pvalue	p.adjust	GOcount	Stages
GO:0001525	angiogenesis	11/780	4589/628320.5	0.0307176	0.262281	11	i
GO:0008544	epidermis development	21/1378	4589/628320.5	0.00162009	0.0359659	21	i
GO:0030198	extracellular matrix organization	76/2701	12122/1076044.5	1.7728e-12	1.62427e-11	76	iv
GO:0043062	extracellular structure organization	76/2701	12122/1076044.5	1.7728e-12	1.62427e-11	76	iv
GO:0006959	humoral immune response	396/1770	34695/661250	0	0	396	ii
GO:0050900	leukocyte migration	260/1596	34695/661250	0	0	260	ii
GO:0016485	protein processing	96/990	12122/1076044.5	0	0	96	iv
GO:0022617	extracellular matrix disassembly	7/253	12122/1076044.5	0.0257294	0.0792934	7	iv
GO:0043588	skin development	32/1770	12122/1076044.5	0.00740458	0.0275841	32	iv
