# Supplementary material for: Co-expression based cancer staging and application
Source: Sci Rep. 2020 Jun 30;10:10624. doi: 10.1038/s41598-020-67476-7 (PMC7327081; doi:10.1038/s41598-020-67476-7)
Supplement: Supplementary file 9 — Supplementary file9 [file 41598_2020_67476_MOESM9_ESM.xlsx]

## Sheet: BRCA_Stage
ID	Description	GPRatio	BgRatio	pvalue	p.adjust	GOcount	Stages
	disappear gradually in stage i
GO:0031032	actomyosin structure organization	174/435	23584/1561144.5	0	0	174	control_i
GO:0007512	adult heart development	3/10	23584/1561144.5	0.000382026	0.000600018	3	control_i
GO:0015837	amine transport	4/91	23584/1561144.5	0.0495543	0.0617763	4	control_i
GO:0055074	calcium ion homeostasis	41/903	23584/1561144.5	1.15112e-09	2.78271e-09	41	control_i
GO:0060402	calcium ion transport into cytosol	8/171	23584/1561144.5	0.00475741	0.00674776	8	control_i
GO:0019933	cAMP-mediated signaling	9/105	23584/1561144.5	3.33639e-05	5.62131e-05	9	control_i
GO:0055006	cardiac cell development	36/78	23584/1561144.5	0	0	36	control_i
GO:0055013	cardiac muscle cell development	36/78	23584/1561144.5	0	0	36	control_i
GO:0055003	cardiac myofibril assembly	10/15	23584/1561144.5	1.77636e-15	5.25348e-15	10	control_i
GO:0003208	cardiac ventricle morphogenesis	17/91	23584/1561144.5	4.39648e-14	1.22222e-13	17	control_i
GO:0006874	cellular calcium ion homeostasis	38/861	23584/1561144.5	9.57794e-09	2.16477e-08	38	control_i
GO:0010927	cellular component assembly involved in morphogenesis	172/351	23584/1561144.5	0	0	172	control_i
GO:0072503	cellular divalent inorganic cation homeostasis	38/990	23584/1561144.5	3.26134e-07	6.86858e-07	38	control_i
GO:0071804	cellular potassium ion transport	10/276	23584/1561144.5	0.0100289	0.0134688	10	control_i
GO:0019935	cyclic-nucleotide-mediated signaling	14/120	23584/1561144.5	4.80257e-09	1.1034e-08	14	control_i
GO:0007586	digestion	13/435	23584/1561144.5	0.0165539	0.0218103	13	control_i
GO:0022600	digestive system process	6/153	23584/1561144.5	0.0294731	0.037933	6	control_i
GO:0016101	diterpenoid metabolic process	15/136	23584/1561144.5	3.00599e-09	6.96387e-09	15	control_i
GO:0046660	female sex differentiation	7/171	23584/1561144.5	0.0158347	0.0209622	7	control_i
GO:0002227	innate immune response in mucosa	3/28	23584/1561144.5	0.00851671	0.0116633	3	control_i
GO:0050892	intestinal absorption	3/45	23584/1561144.5	0.0305501	0.0387804	3	control_i
GO:0044241	lipid digestion	3/36	23584/1561144.5	0.01698	0.0222662	3	control_i
GO:0051235	maintenance of location	71/630	23584/1561144.5	0	0	71	control_i
GO:0051899	membrane depolarization	9/105	23584/1561144.5	3.33639e-05	5.62131e-05	9	control_i
GO:0002385	mucosal immune response	3/45	23584/1561144.5	0.0305501	0.0387804	3	control_i
GO:0050879	multicellular organismal movement	66/171	23584/1561144.5	0	0	66	control_i
GO:0035637	multicellular organismal signaling	19/325	23584/1561144.5	7.97167e-07	1.65382e-06	19	control_i
GO:0055001	muscle cell development	257/666	23584/1561144.5	0	0	257	control_i
GO:0042692	muscle cell differentiation	334/1275	23584/1561144.5	0	0	334	control_i
GO:0048747	muscle fiber development	55/120	23584/1561144.5	0	0	55	control_i
GO:0003012	muscle system process	841/3570	23584/1561144.5	0	0	841	control_i
GO:0050881	musculoskeletal movement	66/171	23584/1561144.5	0	0	66	control_i
GO:0030239	myofibril assembly	172/325	23584/1561144.5	0	0	172	control_i
GO:0031034	myosin filament assembly	6/28	23584/1561144.5	3.36267e-06	6.58326e-06	6	control_i
GO:0031033	myosin filament organization	6/28	23584/1561144.5	3.36267e-06	6.58326e-06	6	control_i
GO:0014902	myotube differentiation	30/136	23584/1561144.5	0	0	30	control_i
GO:0050995	negative regulation of lipid catabolic process	7/21	23584/1561144.5	1.73211e-08	3.88327e-08	7	control_i
GO:0002251	organ or tissue specific immune response	3/45	23584/1561144.5	0.0305501	0.0387804	3	control_i
GO:0010524	positive regulation of calcium ion transport into cytosol	4/55	23584/1561144.5	0.00963259	0.0130627	4	control_i
GO:0030816	positive regulation of cAMP metabolic process	5/120	23584/1561144.5	0.0361152	0.0456365	5	control_i
GO:0030801	positive regulation of cyclic nucleotide metabolic process	8/136	23584/1561144.5	0.00115407	0.00175318	8	control_i
GO:0007204	positive regulation of cytosolic calcium ion concentration	14/435	23584/1561144.5	0.007293	0.0100868	14	control_i
GO:0046887	positive regulation of hormone secretion	10/190	23584/1561144.5	0.000701742	0.00107189	10	control_i
GO:0051281	positive regulation of release of sequestered calcium ion into cytosol	4/36	23584/1561144.5	0.00208528	0.00310005	4	control_i
GO:0051047	positive regulation of secretion	31/780	23584/1561144.5	1.846e-06	3.77344e-06	31	control_i
GO:1903532	positive regulation of secretion by cell	25/703	23584/1561144.5	0.000101453	0.000163028	25	control_i
GO:0045907	positive regulation of vasoconstriction	4/36	23584/1561144.5	0.00208528	0.00310005	4	control_i
GO:0071805	potassium ion transmembrane transport	10/276	23584/1561144.5	0.0100289	0.0134688	10	control_i
GO:0010522	regulation of calcium ion transport into cytosol	5/105	23584/1561144.5	0.0219398	0.0286351	5	control_i
GO:1903779	regulation of cardiac conduction	9/78	23584/1561144.5	2.91626e-06	5.83252e-06	9	control_i
GO:0002027	regulation of heart rate	9/105	23584/1561144.5	3.33639e-05	5.62131e-05	9	control_i
GO:0034765	regulation of ion transmembrane transport	52/946	23584/1561144.5	5.55112e-15	1.60751e-14	52	control_i
GO:0050994	regulation of lipid catabolic process	17/55	23584/1561144.5	0	0	17	control_i
GO:0042391	regulation of membrane potential	42/1176	23584/1561144.5	5.38983e-07	1.1266e-06	42	control_i
GO:0006937	regulation of muscle contraction	90/528	23584/1561144.5	0	0	90	control_i
GO:0090257	regulation of muscle system process	163/703	23584/1561144.5	0	0	163	control_i
GO:0045661	regulation of myoblast differentiation	16/55	23584/1561144.5	1.11022e-16	3.31873e-16	16	control_i
GO:0051279	regulation of release of sequestered calcium ion into cytosol	5/78	23584/1561144.5	0.00667198	0.00927405	5	control_i
GO:0014819	regulation of skeletal muscle contraction	10/21	23584/1561144.5	1.87184e-13	5.14403e-13	10	control_i
GO:0006940	regulation of smooth muscle contraction	4/91	23584/1561144.5	0.0495543	0.0617763	4	control_i
GO:0006942	regulation of striated muscle contraction	41/171	23584/1561144.5	0	0	41	control_i
GO:0034762	regulation of transmembrane transport	52/946	23584/1561144.5	5.55112e-15	1.60751e-14	52	control_i
GO:0019229	regulation of vasoconstriction	6/66	23584/1561144.5	0.000497154	0.000772116	6	control_i
GO:0051592	response to calcium ion	10/136	23584/1561144.5	4.66603e-05	7.72116e-05	10	control_i
GO:0014894	response to denervation involved in regulation of muscle adaptation	5/10	23584/1561144.5	1.8604e-07	3.94802e-07	5	control_i
GO:0002021	response to dietary excess	2/21	23584/1561144.5	0.039628	0.0498488	2	control_i
GO:0042493	response to drug	53/1128	23584/1561144.5	1.37024e-12	3.69831e-12	53	control_i
GO:0010038	response to metal ion	25/561	23584/1561144.5	2.47131e-06	4.97844e-06	25	control_i
GO:0014870	response to muscle inactivity	5/10	23584/1561144.5	1.8604e-07	3.94802e-07	5	control_i
GO:0014877	response to muscle inactivity involved in regulation of muscle adaptation	5/10	23584/1561144.5	1.8604e-07	3.94802e-07	5	control_i
GO:0014874	response to stimulus involved in regulation of muscle adaptation	9/15	23584/1561144.5	1.88738e-13	5.14403e-13	9	control_i
GO:0001523	retinoid metabolic process	15/136	23584/1561144.5	3.00599e-09	6.96387e-09	15	control_i
GO:0042572	retinol metabolic process	3/28	23584/1561144.5	0.00851671	0.0116633	3	control_i
GO:0045214	sarcomere organization	66/120	23584/1561144.5	0	0	66	control_i
GO:0070296	sarcoplasmic reticulum calcium ion transport	5/36	23584/1561144.5	0.000200657	0.000320589	5	control_i
GO:0019932	second-messenger-mediated signaling	27/496	23584/1561144.5	1.94533e-08	4.32641e-08	27	control_i
GO:0043501	skeletal muscle adaptation	21/36	23584/1561144.5	0	0	21	control_i
GO:0035914	skeletal muscle cell differentiation	21/66	23584/1561144.5	0	0	21	control_i
GO:0003009	skeletal muscle contraction	66/153	23584/1561144.5	0	0	66	control_i
GO:0048741	skeletal muscle fiber development	15/28	23584/1561144.5	0	0	15	control_i
GO:0060538	skeletal muscle organ development	128/406	23584/1561144.5	0	0	128	control_i
GO:0007519	skeletal muscle tissue development	124/325	23584/1561144.5	0	0	124	control_i
GO:0014888	striated muscle adaptation	36/66	23584/1561144.5	0	0	36	control_i
GO:0055002	striated muscle cell development	232/561	23584/1561144.5	0	0	232	control_i
GO:0051146	striated muscle cell differentiation	256/903	23584/1561144.5	0	0	256	control_i
GO:0006941	striated muscle contraction	328/946	23584/1561144.5	0	0	328	control_i
GO:0071688	striated muscle myosin thick filament assembly	6/28	23584/1561144.5	3.36267e-06	6.58326e-06	6	control_i
GO:0006721	terpenoid metabolic process	15/136	23584/1561144.5	3.00599e-09	6.96387e-09	15	control_i
GO:0042310	vasoconstriction	6/91	23584/1561144.5	0.00265184	0.00388005	6	control_i
GO:0003229	ventricular cardiac muscle tissue development	17/55	23584/1561144.5	0	0	17	control_i
GO:0055010	ventricular cardiac muscle tissue morphogenesis	17/55	23584/1561144.5	0	0	17	control_i
	disappear gradually in stage ii
GO:0001508	action potential	13/253	30247/2186140.5	6.41302e-05	0.000117901	13	control_ii
GO:0055090	acylglycerol homeostasis	6/36	30247/2186140.5	9.56153e-06	1.93662e-05	6	control_ii
GO:0097553	calcium ion transmembrane import into cytosol	16/231	30247/2186140.5	2.01397e-07	4.91163e-07	16	control_ii
GO:0061337	cardiac conduction	25/300	30247/2186140.5	1.65234e-12	4.93638e-12	25	control_ii
GO:0071300	cellular response to retinoic acid	6/91	30247/2186140.5	0.00171506	0.00281719	6	control_ii
GO:0071466	cellular response to xenobiotic stimulus	14/210	30247/2186140.5	1.78705e-06	4.10678e-06	14	control_ii
GO:0060401	cytosolic calcium ion transport	19/325	30247/2186140.5	2.17368e-07	5.24758e-07	19	control_ii
GO:0021700	developmental maturation	23/630	30247/2186140.5	3.5487e-05	6.9236e-05	23	control_ii
GO:0060986	endocrine hormone secretion	5/66	30247/2186140.5	0.0022497	0.00368273	5	control_ii
GO:0050886	endocrine process	8/171	30247/2186140.5	0.00282161	0.00460318	8	control_ii
GO:0006069	ethanol oxidation	4/15	30247/2186140.5	4.42613e-05	8.29683e-05	4	control_ii
GO:0046879	hormone secretion	39/990	30247/2186140.5	1.27285e-08	3.28877e-08	39	control_ii
GO:0009914	hormone transport	39/1035	30247/2186140.5	4.07523e-08	1.03615e-07	39	control_ii
GO:0006720	isoprenoid metabolic process	18/231	30247/2186140.5	5.81772e-09	1.51134e-08	18	control_ii
GO:0042693	muscle cell fate commitment	6/21	30247/2186140.5	3.18243e-07	7.60602e-07	6	control_ii
GO:0007520	myoblast fusion	11/66	30247/2186140.5	1.89363e-09	4.94621e-09	11	control_ii
GO:0014904	myotube cell development	28/55	30247/2186140.5	0	0	28	control_ii
GO:0032845	negative regulation of homeostatic process	18/406	30247/2186140.5	2.05887e-05	4.03336e-05	18	control_ii
GO:0060761	negative regulation of response to cytokine stimulus	7/66	30247/2186140.5	3.69798e-05	7.18551e-05	7	control_ii
GO:1903531	negative regulation of secretion by cell	18/351	30247/2186140.5	2.8769e-06	6.48659e-06	18	control_ii
GO:0051283	negative regulation of sequestering of calcium ion	16/210	30247/2186140.5	5.44866e-08	1.35649e-07	16	control_ii
GO:0030072	peptide hormone secretion	15/561	30247/2186140.5	0.0129593	0.0201776	15	control_ii
GO:0002576	platelet degranulation	7/210	30247/2186140.5	0.0279811	0.0424602	7	control_ii
GO:1903580	positive regulation of ATP metabolic process	8/36	30247/2186140.5	2.87338e-08	7.38427e-08	8	control_ii
GO:1904064	positive regulation of cation transmembrane transport	13/190	30247/2186140.5	3.10428e-06	6.9664e-06	13	control_ii
GO:0034767	positive regulation of ion transmembrane transport	13/210	30247/2186140.5	9.20639e-06	1.90505e-05	13	control_ii
GO:0043270	positive regulation of ion transport	26/561	30247/2186140.5	1.50564e-07	3.69076e-07	26	control_ii
GO:0045834	positive regulation of lipid metabolic process	34/210	30247/2186140.5	0	0	34	control_ii
GO:0002793	positive regulation of peptide secretion	14/595	30247/2186140.5	0.0404236	0.0607589	14	control_ii
GO:0006813	potassium ion transport	24/741	30247/2186140.5	0.000151515	0.000268238	24	control_ii
GO:0010737	protein kinase A signaling	3/36	30247/2186140.5	0.0134557	0.0206812	3	control_ii
GO:0031099	regeneration	34/378	30247/2186140.5	0	0	34	control_ii
GO:1904062	regulation of cation transmembrane transport	60/780	30247/2186140.5	0	0	60	control_ii
GO:0051480	regulation of cytosolic calcium ion concentration	28/946	30247/2186140.5	0.000201457	0.000354032	28	control_ii
GO:0034114	regulation of heterotypic cell-cell adhesion	3/21	30247/2186140.5	0.00292267	0.00471971	3	control_ii
GO:0010959	regulation of metal ion transport	76/990	30247/2186140.5	0	0	76	control_ii
GO:1901739	regulation of myoblast fusion	4/21	30247/2186140.5	0.000181611	0.000320333	4	control_ii
GO:0010830	regulation of myotube differentiation	16/78	30247/2186140.5	1.37668e-14	4.41645e-14	16	control_ii
GO:0052547	regulation of peptidase activity	30/1540	30247/2186140.5	0.042398	0.0629387	30	control_ii
GO:0090276	regulation of peptide hormone secretion	15/435	30247/2186140.5	0.0013175	0.0021943	15	control_ii
GO:0002791	regulation of peptide secretion	65/1711	30247/2186140.5	1.2268e-12	3.68811e-12	65	control_ii
GO:0050708	regulation of protein secretion	57/1275	30247/2186140.5	4.57412e-14	1.42904e-13	57	control_ii
GO:1903034	regulation of response to wounding	9/325	30247/2186140.5	0.0389665	0.058757	9	control_ii
GO:0051282	regulation of sequestering of calcium ion	16/210	30247/2186140.5	5.44866e-08	1.35649e-07	16	control_ii
GO:0032409	regulation of transporter activity	50/528	30247/2186140.5	0	0	50	control_ii
GO:0061041	regulation of wound healing	9/276	30247/2186140.5	0.0157235	0.0240891	9	control_ii
GO:0051209	release of sequestered calcium ion into cytosol	16/210	30247/2186140.5	5.44866e-08	1.35649e-07	16	control_ii
GO:0014808	release of sequestered calcium ion into cytosol by sarcoplasmic reticulum	5/36	30247/2186140.5	0.000133632	0.000238343	5	control_ii
GO:0097305	response to alcohol	26/406	30247/2186140.5	2.08622e-10	5.76425e-10	26	control_ii
GO:0031960	response to corticosteroid	10/276	30247/2186140.5	0.00561854	0.00886358	10	control_ii
GO:0009991	response to extracellular stimulus	68/1540	30247/2186140.5	3.33067e-16	1.12912e-15	68	control_ii
GO:0033762	response to glucagon	6/78	30247/2186140.5	0.000769175	0.00129917	6	control_ii
GO:0051384	response to glucocorticoid	10/253	30247/2186140.5	0.00307046	0.0049251	10	control_ii
GO:0009749	response to glucose	19/378	30247/2186140.5	2.07366e-06	4.74263e-06	19	control_ii
GO:0031667	response to nutrient levels	67/1431	30247/2186140.5	0	0	67	control_ii
GO:0032526	response to retinoic acid	10/153	30247/2186140.5	6.11953e-05	0.000113377	10	control_ii
GO:0009410	response to xenobiotic stimulus	14/231	30247/2186140.5	5.40325e-06	1.20128e-05	14	control_ii
GO:0051208	sequestering of calcium ion	16/210	30247/2186140.5	5.44866e-08	1.35649e-07	16	control_ii
GO:0023061	signal release	45/1770	30247/2186140.5	0.000113419	0.000203577	45	control_ii
GO:0006949	syncytium formation	11/66	30247/2186140.5	1.89363e-09	4.94621e-09	11	control_ii
GO:0000768	syncytium formation by plasma membrane fusion	11/66	30247/2186140.5	1.89363e-09	4.94621e-09	11	control_ii
GO:0042246	tissue regeneration	19/78	30247/2186140.5	0	0	19	control_ii
GO:0070328	triglyceride homeostasis	6/36	30247/2186140.5	9.56153e-06	1.93662e-05	6	control_ii
GO:0006805	xenobiotic metabolic process	14/190	30247/2186140.5	5.42383e-07	1.28346e-06	14	control_ii
	disappear gradually in stage iii
GO:0070588	calcium ion transmembrane transport	47/741	27346/1268824.5	1.21802e-10	2.74877e-10	47	control_iii
GO:0003206	cardiac chamber morphogenesis	23/171	27346/1268824.5	4.01401e-12	9.85794e-12	23	control_iii
GO:0055007	cardiac muscle cell differentiation	37/153	27346/1268824.5	0	0	37	control_iii
GO:0071229	cellular response to acid chemical	29/325	27346/1268824.5	2.04573e-10	4.49522e-10	29	control_iii
GO:0071398	cellular response to fatty acid	7/55	27346/1268824.5	0.000176889	0.000282683	7	control_iii
GO:0045980	negative regulation of nucleotide metabolic process	5/78	27346/1268824.5	0.0268669	0.0367768	5	control_iii
GO:1900543	negative regulation of purine nucleotide metabolic process	5/78	27346/1268824.5	0.0268669	0.0367768	5	control_iii
GO:0035265	organ growth	15/231	27346/1268824.5	0.000174833	0.000282683	15	control_iii
GO:1903169	regulation of calcium ion transmembrane transport	23/190	27346/1268824.5	3.59097e-11	8.21496e-11	23	control_iii
GO:2001257	regulation of cation channel activity	14/253	27346/1268824.5	0.00135367	0.00200945	14	control_iii
GO:0032412	regulation of ion transmembrane transporter activity	34/406	27346/1268824.5	3.39433e-11	7.87296e-11	34	control_iii
GO:0010880	regulation of release of sequestered calcium ion into cytosol by sarcoplasmic reticulum	3/28	27346/1268824.5	0.0219415	0.0302829	3	control_iii
GO:0022898	regulation of transmembrane transporter activity	34/406	27346/1268824.5	3.39433e-11	7.87296e-11	34	control_iii
GO:1903514	release of sequestered calcium ion into cytosol by endoplasmic reticulum	5/36	27346/1268824.5	0.00100387	0.00149685	5	control_iii
GO:0070542	response to fatty acid	24/120	27346/1268824.5	2.22045e-16	6.50552e-16	24	control_iii
GO:0009612	response to mechanical stimulus	20/378	27346/1268824.5	0.000263399	0.000418931	20	control_iii
	disappear gradually in stage iv
GO:0046463	acylglycerol biosynthetic process	14/36	32086/1184260.5	2.47802e-13	1.09821e-12	14	control_iv
GO:0046942	carboxylic acid transport	67/595	32086/1184260.5	0	0	67	control_iv
GO:0003300	cardiac muscle hypertrophy	22/120	32086/1184260.5	1.6086e-12	6.81907e-12	22	control_iv
GO:0035051	cardiocyte differentiation	31/276	32086/1184260.5	3.87785e-11	1.5328e-10	31	control_iv
GO:0016049	cell growth	42/1176	32086/1184260.5	0.0461539	0.083077	42	control_iv
GO:0048469	cell maturation	14/253	32086/1184260.5	0.00984197	0.0195171	14	control_iv
GO:0034754	cellular hormone metabolic process	12/153	32086/1184260.5	0.00101484	0.00236526	12	control_iv
GO:0071320	cellular response to cAMP	6/66	32086/1184260.5	0.0089755	0.0179204	6	control_iv
GO:0097009	energy homeostasis	3/28	32086/1184260.5	0.0393456	0.0712606	3	control_iv
GO:0006067	ethanol metabolic process	4/21	32086/1184260.5	0.00222806	0.00488668	4	control_iv
GO:0015909	long-chain fatty acid transport	23/66	32086/1184260.5	0	0	23	control_iv
GO:0015718	monocarboxylic acid transport	51/231	32086/1184260.5	0	0	51	control_iv
GO:0043500	muscle adaptation	39/153	32086/1184260.5	0	0	39	control_iv
GO:0014896	muscle hypertrophy	22/136	32086/1184260.5	2.14828e-11	8.6672e-11	22	control_iv
GO:0051926	negative regulation of calcium ion transport	9/66	32086/1184260.5	7.20173e-05	0.000194148	9	control_iv
GO:0043271	negative regulation of ion transport	15/190	32086/1184260.5	0.000237825	0.000592032	15	control_iv
GO:0046460	neutral lipid biosynthetic process	14/36	32086/1184260.5	2.47802e-13	1.09821e-12	14	control_iv
GO:0048709	oligodendrocyte differentiation	7/91	32086/1184260.5	0.0119887	0.023614	7	control_iv
GO:0015849	organic acid transport	67/630	32086/1184260.5	0	0	67	control_iv
GO:0051197	positive regulation of coenzyme metabolic process	5/21	32086/1184260.5	0.000206491	0.000518442	5	control_iv
GO:0051194	positive regulation of cofactor metabolic process	5/21	32086/1184260.5	0.000206491	0.000518442	5	control_iv
GO:0048639	positive regulation of developmental growth	19/253	32086/1184260.5	7.44526e-05	0.000196193	19	control_iv
GO:0045923	positive regulation of fatty acid metabolic process	6/28	32086/1184260.5	8.90854e-05	0.000231622	6	control_iv
GO:0045821	positive regulation of glycolytic process	5/15	32086/1184260.5	3.49061e-05	9.58689e-05	5	control_iv
GO:0045927	positive regulation of growth	30/465	32086/1184260.5	1.54694e-05	4.37177e-05	30	control_iv
GO:0060421	positive regulation of heart growth	4/45	32086/1184260.5	0.0332777	0.0619983	4	control_iv
GO:0032103	positive regulation of response to external stimulus	21/496	32086/1184260.5	0.031714	0.0598474	21	control_iv
GO:0034764	positive regulation of transmembrane transport	15/171	32086/1184260.5	7.40164e-05	0.000195926	15	control_iv
GO:1903115	regulation of actin filament-based movement	6/45	32086/1184260.5	0.00130015	0.0030182	6	control_iv
GO:0090066	regulation of anatomical structure size	54/1128	32086/1184260.5	6.18698e-05	0.000168343	54	control_iv
GO:1901019	regulation of calcium ion transmembrane transporter activity	14/91	32086/1184260.5	1.72008e-07	5.71733e-07	14	control_iv
GO:0051924	regulation of calcium ion transport	29/406	32086/1184260.5	3.10942e-06	9.32825e-06	29	control_iv
GO:0050848	regulation of calcium-mediated signaling	7/91	32086/1184260.5	0.0119887	0.023614	7	control_iv
GO:0043949	regulation of cAMP-mediated signaling	4/21	32086/1184260.5	0.00222806	0.00488668	4	control_iv
GO:0055117	regulation of cardiac muscle contraction	11/120	32086/1184260.5	0.000445112	0.00107599	11	control_iv
GO:0051302	regulation of cell division	30/190	32086/1184260.5	1.06581e-14	4.83334e-14	30	control_iv
GO:0001558	regulation of cell growth	32/820	32086/1184260.5	0.027843	0.0534038	32	control_iv
GO:0048638	regulation of developmental growth	51/595	32086/1184260.5	1.19749e-12	5.11335e-12	51	control_iv
GO:0046320	regulation of fatty acid oxidation	10/28	32086/1184260.5	1.78479e-09	6.28978e-09	10	control_iv
GO:0060191	regulation of lipase activity	6/91	32086/1184260.5	0.0375181	0.0690191	6	control_iv
GO:0046890	regulation of lipid biosynthetic process	65/231	32086/1184260.5	0	0	65	control_iv
GO:0050746	regulation of lipoprotein metabolic process	3/15	32086/1184260.5	0.00708646	0.0145971	3	control_iv
GO:0090266	regulation of mitotic cell cycle spindle assembly checkpoint	3/15	32086/1184260.5	0.00708646	0.0145971	3	control_iv
GO:1903504	regulation of mitotic spindle checkpoint	3/15	32086/1184260.5	0.00708646	0.0145971	3	control_iv
GO:0043502	regulation of muscle adaptation	36/120	32086/1184260.5	0	0	36	control_iv
GO:0048634	regulation of muscle organ development	19/231	32086/1184260.5	2.1671e-05	6.03693e-05	19	control_iv
GO:1901861	regulation of muscle tissue development	19/210	32086/1184260.5	5.60989e-06	1.62464e-05	19	control_iv
GO:0060314	regulation of ryanodine-sensitive calcium-release channel activity	5/36	32086/1184260.5	0.00273116	0.00596167	5	control_iv
GO:0090231	regulation of spindle checkpoint	3/15	32086/1184260.5	0.00708646	0.0145971	3	control_iv
GO:0016202	regulation of striated muscle tissue development	19/210	32086/1184260.5	5.60989e-06	1.62464e-05	19	control_iv
GO:0090075	relaxation of muscle	4/28	32086/1184260.5	0.00655807	0.0137508	4	control_iv
GO:0070482	response to oxygen levels	38/903	32086/1184260.5	0.00600078	0.0126668	38	control_iv
GO:0014897	striated muscle hypertrophy	22/136	32086/1184260.5	2.14828e-11	8.6672e-11	22	control_iv
GO:0050808	synapse organization	21/465	32086/1184260.5	0.0172352	0.0331665	21	control_iv
GO:0007178	transmembrane receptor protein serine/threonine kinase signaling pathway	27/630	32086/1184260.5	0.0146075	0.0284846	27	control_iv
GO:0019432	triglyceride biosynthetic process	14/36	32086/1184260.5	2.47802e-13	1.09821e-12	14	control_iv
	disappear gradually in total
GO:0031032	actomyosin structure organization	174/435	23584/1561144.5	0	0	174	control_i
GO:0007512	adult heart development	3/10	23584/1561144.5	0.000382026	0.000600018	3	control_i
GO:0015837	amine transport	4/91	23584/1561144.5	0.0495543	0.0617763	4	control_i
GO:0055074	calcium ion homeostasis	41/903	23584/1561144.5	1.15112e-09	2.78271e-09	41	control_i
GO:0060402	calcium ion transport into cytosol	8/171	23584/1561144.5	0.00475741	0.00674776	8	control_i
GO:0019933	cAMP-mediated signaling	9/105	23584/1561144.5	3.33639e-05	5.62131e-05	9	control_i
GO:0055006	cardiac cell development	36/78	23584/1561144.5	0	0	36	control_i
GO:0055013	cardiac muscle cell development	36/78	23584/1561144.5	0	0	36	control_i
GO:0055003	cardiac myofibril assembly	10/15	23584/1561144.5	1.77636e-15	5.25348e-15	10	control_i
GO:0003208	cardiac ventricle morphogenesis	17/91	23584/1561144.5	4.39648e-14	1.22222e-13	17	control_i
GO:0006874	cellular calcium ion homeostasis	38/861	23584/1561144.5	9.57794e-09	2.16477e-08	38	control_i
GO:0010927	cellular component assembly involved in morphogenesis	172/351	23584/1561144.5	0	0	172	control_i
GO:0072503	cellular divalent inorganic cation homeostasis	38/990	23584/1561144.5	3.26134e-07	6.86858e-07	38	control_i
GO:0071804	cellular potassium ion transport	10/276	23584/1561144.5	0.0100289	0.0134688	10	control_i
GO:0019935	cyclic-nucleotide-mediated signaling	14/120	23584/1561144.5	4.80257e-09	1.1034e-08	14	control_i
GO:0007586	digestion	13/435	23584/1561144.5	0.0165539	0.0218103	13	control_i
GO:0022600	digestive system process	6/153	23584/1561144.5	0.0294731	0.037933	6	control_i
GO:0016101	diterpenoid metabolic process	15/136	23584/1561144.5	3.00599e-09	6.96387e-09	15	control_i
GO:0046660	female sex differentiation	7/171	23584/1561144.5	0.0158347	0.0209622	7	control_i
GO:0002227	innate immune response in mucosa	3/28	23584/1561144.5	0.00851671	0.0116633	3	control_i
GO:0050892	intestinal absorption	3/45	23584/1561144.5	0.0305501	0.0387804	3	control_i
GO:0044241	lipid digestion	3/36	23584/1561144.5	0.01698	0.0222662	3	control_i
GO:0051235	maintenance of location	71/630	23584/1561144.5	0	0	71	control_i
GO:0051899	membrane depolarization	9/105	23584/1561144.5	3.33639e-05	5.62131e-05	9	control_i
GO:0002385	mucosal immune response	3/45	23584/1561144.5	0.0305501	0.0387804	3	control_i
GO:0050879	multicellular organismal movement	66/171	23584/1561144.5	0	0	66	control_i
GO:0035637	multicellular organismal signaling	19/325	23584/1561144.5	7.97167e-07	1.65382e-06	19	control_i
GO:0055001	muscle cell development	257/666	23584/1561144.5	0	0	257	control_i
GO:0042692	muscle cell differentiation	334/1275	23584/1561144.5	0	0	334	control_i
GO:0048747	muscle fiber development	55/120	23584/1561144.5	0	0	55	control_i
GO:0003012	muscle system process	841/3570	23584/1561144.5	0	0	841	control_i
GO:0050881	musculoskeletal movement	66/171	23584/1561144.5	0	0	66	control_i
GO:0030239	myofibril assembly	172/325	23584/1561144.5	0	0	172	control_i
GO:0031034	myosin filament assembly	6/28	23584/1561144.5	3.36267e-06	6.58326e-06	6	control_i
GO:0031033	myosin filament organization	6/28	23584/1561144.5	3.36267e-06	6.58326e-06	6	control_i
GO:0014902	myotube differentiation	30/136	23584/1561144.5	0	0	30	control_i
GO:0050995	negative regulation of lipid catabolic process	7/21	23584/1561144.5	1.73211e-08	3.88327e-08	7	control_i
GO:0002251	organ or tissue specific immune response	3/45	23584/1561144.5	0.0305501	0.0387804	3	control_i
GO:0010524	positive regulation of calcium ion transport into cytosol	4/55	23584/1561144.5	0.00963259	0.0130627	4	control_i
GO:0030816	positive regulation of cAMP metabolic process	5/120	23584/1561144.5	0.0361152	0.0456365	5	control_i
GO:0030801	positive regulation of cyclic nucleotide metabolic process	8/136	23584/1561144.5	0.00115407	0.00175318	8	control_i
GO:0007204	positive regulation of cytosolic calcium ion concentration	14/435	23584/1561144.5	0.007293	0.0100868	14	control_i
GO:0046887	positive regulation of hormone secretion	10/190	23584/1561144.5	0.000701742	0.00107189	10	control_i
GO:0051281	positive regulation of release of sequestered calcium ion into cytosol	4/36	23584/1561144.5	0.00208528	0.00310005	4	control_i
GO:0051047	positive regulation of secretion	31/780	23584/1561144.5	1.846e-06	3.77344e-06	31	control_i
GO:1903532	positive regulation of secretion by cell	25/703	23584/1561144.5	0.000101453	0.000163028	25	control_i
GO:0045907	positive regulation of vasoconstriction	4/36	23584/1561144.5	0.00208528	0.00310005	4	control_i
GO:0071805	potassium ion transmembrane transport	10/276	23584/1561144.5	0.0100289	0.0134688	10	control_i
GO:0010522	regulation of calcium ion transport into cytosol	5/105	23584/1561144.5	0.0219398	0.0286351	5	control_i
GO:1903779	regulation of cardiac conduction	9/78	23584/1561144.5	2.91626e-06	5.83252e-06	9	control_i
GO:0002027	regulation of heart rate	9/105	23584/1561144.5	3.33639e-05	5.62131e-05	9	control_i
GO:0034765	regulation of ion transmembrane transport	52/946	23584/1561144.5	5.55112e-15	1.60751e-14	52	control_i
GO:0050994	regulation of lipid catabolic process	17/55	23584/1561144.5	0	0	17	control_i
GO:0042391	regulation of membrane potential	42/1176	23584/1561144.5	5.38983e-07	1.1266e-06	42	control_i
GO:0006937	regulation of muscle contraction	90/528	23584/1561144.5	0	0	90	control_i
GO:0090257	regulation of muscle system process	163/703	23584/1561144.5	0	0	163	control_i
GO:0045661	regulation of myoblast differentiation	16/55	23584/1561144.5	1.11022e-16	3.31873e-16	16	control_i
GO:0051279	regulation of release of sequestered calcium ion into cytosol	5/78	23584/1561144.5	0.00667198	0.00927405	5	control_i
GO:0014819	regulation of skeletal muscle contraction	10/21	23584/1561144.5	1.87184e-13	5.14403e-13	10	control_i
GO:0006940	regulation of smooth muscle contraction	4/91	23584/1561144.5	0.0495543	0.0617763	4	control_i
GO:0006942	regulation of striated muscle contraction	41/171	23584/1561144.5	0	0	41	control_i
GO:0034762	regulation of transmembrane transport	52/946	23584/1561144.5	5.55112e-15	1.60751e-14	52	control_i
GO:0019229	regulation of vasoconstriction	6/66	23584/1561144.5	0.000497154	0.000772116	6	control_i
GO:0051592	response to calcium ion	10/136	23584/1561144.5	4.66603e-05	7.72116e-05	10	control_i
GO:0014894	response to denervation involved in regulation of muscle adaptation	5/10	23584/1561144.5	1.8604e-07	3.94802e-07	5	control_i
GO:0002021	response to dietary excess	2/21	23584/1561144.5	0.039628	0.0498488	2	control_i
GO:0042493	response to drug	53/1128	23584/1561144.5	1.37024e-12	3.69831e-12	53	control_i
GO:0010038	response to metal ion	25/561	23584/1561144.5	2.47131e-06	4.97844e-06	25	control_i
GO:0014870	response to muscle inactivity	5/10	23584/1561144.5	1.8604e-07	3.94802e-07	5	control_i
GO:0014877	response to muscle inactivity involved in regulation of muscle adaptation	5/10	23584/1561144.5	1.8604e-07	3.94802e-07	5	control_i
GO:0014874	response to stimulus involved in regulation of muscle adaptation	9/15	23584/1561144.5	1.88738e-13	5.14403e-13	9	control_i
GO:0001523	retinoid metabolic process	15/136	23584/1561144.5	3.00599e-09	6.96387e-09	15	control_i
GO:0042572	retinol metabolic process	3/28	23584/1561144.5	0.00851671	0.0116633	3	control_i
GO:0045214	sarcomere organization	66/120	23584/1561144.5	0	0	66	control_i
GO:0070296	sarcoplasmic reticulum calcium ion transport	5/36	23584/1561144.5	0.000200657	0.000320589	5	control_i
GO:0019932	second-messenger-mediated signaling	27/496	23584/1561144.5	1.94533e-08	4.32641e-08	27	control_i
GO:0043501	skeletal muscle adaptation	21/36	23584/1561144.5	0	0	21	control_i
GO:0035914	skeletal muscle cell differentiation	21/66	23584/1561144.5	0	0	21	control_i
GO:0003009	skeletal muscle contraction	66/153	23584/1561144.5	0	0	66	control_i
GO:0048741	skeletal muscle fiber development	15/28	23584/1561144.5	0	0	15	control_i
GO:0060538	skeletal muscle organ development	128/406	23584/1561144.5	0	0	128	control_i
GO:0007519	skeletal muscle tissue development	124/325	23584/1561144.5	0	0	124	control_i
GO:0014888	striated muscle adaptation	36/66	23584/1561144.5	0	0	36	control_i
GO:0055002	striated muscle cell development	232/561	23584/1561144.5	0	0	232	control_i
GO:0051146	striated muscle cell differentiation	256/903	23584/1561144.5	0	0	256	control_i
GO:0006941	striated muscle contraction	328/946	23584/1561144.5	0	0	328	control_i
GO:0071688	striated muscle myosin thick filament assembly	6/28	23584/1561144.5	3.36267e-06	6.58326e-06	6	control_i
GO:0006721	terpenoid metabolic process	15/136	23584/1561144.5	3.00599e-09	6.96387e-09	15	control_i
GO:0042310	vasoconstriction	6/91	23584/1561144.5	0.00265184	0.00388005	6	control_i
GO:0003229	ventricular cardiac muscle tissue development	17/55	23584/1561144.5	0	0	17	control_i
GO:0055010	ventricular cardiac muscle tissue morphogenesis	17/55	23584/1561144.5	0	0	17	control_i
GO:0001508	action potential	13/253	30247/2186140.5	6.41302e-05	0.000117901	13	control_ii
GO:0055090	acylglycerol homeostasis	6/36	30247/2186140.5	9.56153e-06	1.93662e-05	6	control_ii
GO:0097553	calcium ion transmembrane import into cytosol	16/231	30247/2186140.5	2.01397e-07	4.91163e-07	16	control_ii
GO:0061337	cardiac conduction	25/300	30247/2186140.5	1.65234e-12	4.93638e-12	25	control_ii
GO:0071300	cellular response to retinoic acid	6/91	30247/2186140.5	0.00171506	0.00281719	6	control_ii
GO:0071466	cellular response to xenobiotic stimulus	14/210	30247/2186140.5	1.78705e-06	4.10678e-06	14	control_ii
GO:0060401	cytosolic calcium ion transport	19/325	30247/2186140.5	2.17368e-07	5.24758e-07	19	control_ii
GO:0021700	developmental maturation	23/630	30247/2186140.5	3.5487e-05	6.9236e-05	23	control_ii
GO:0060986	endocrine hormone secretion	5/66	30247/2186140.5	0.0022497	0.00368273	5	control_ii
GO:0050886	endocrine process	8/171	30247/2186140.5	0.00282161	0.00460318	8	control_ii
GO:0006069	ethanol oxidation	4/15	30247/2186140.5	4.42613e-05	8.29683e-05	4	control_ii
GO:0046879	hormone secretion	39/990	30247/2186140.5	1.27285e-08	3.28877e-08	39	control_ii
GO:0009914	hormone transport	39/1035	30247/2186140.5	4.07523e-08	1.03615e-07	39	control_ii
GO:0006720	isoprenoid metabolic process	18/231	30247/2186140.5	5.81772e-09	1.51134e-08	18	control_ii
GO:0042693	muscle cell fate commitment	6/21	30247/2186140.5	3.18243e-07	7.60602e-07	6	control_ii
GO:0007520	myoblast fusion	11/66	30247/2186140.5	1.89363e-09	4.94621e-09	11	control_ii
GO:0014904	myotube cell development	28/55	30247/2186140.5	0	0	28	control_ii
GO:0032845	negative regulation of homeostatic process	18/406	30247/2186140.5	2.05887e-05	4.03336e-05	18	control_ii
GO:0060761	negative regulation of response to cytokine stimulus	7/66	30247/2186140.5	3.69798e-05	7.18551e-05	7	control_ii
GO:1903531	negative regulation of secretion by cell	18/351	30247/2186140.5	2.8769e-06	6.48659e-06	18	control_ii
GO:0051283	negative regulation of sequestering of calcium ion	16/210	30247/2186140.5	5.44866e-08	1.35649e-07	16	control_ii
GO:0030072	peptide hormone secretion	15/561	30247/2186140.5	0.0129593	0.0201776	15	control_ii
GO:0002576	platelet degranulation	7/210	30247/2186140.5	0.0279811	0.0424602	7	control_ii
GO:1903580	positive regulation of ATP metabolic process	8/36	30247/2186140.5	2.87338e-08	7.38427e-08	8	control_ii
GO:1904064	positive regulation of cation transmembrane transport	13/190	30247/2186140.5	3.10428e-06	6.9664e-06	13	control_ii
GO:0034767	positive regulation of ion transmembrane transport	13/210	30247/2186140.5	9.20639e-06	1.90505e-05	13	control_ii
GO:0043270	positive regulation of ion transport	26/561	30247/2186140.5	1.50564e-07	3.69076e-07	26	control_ii
GO:0045834	positive regulation of lipid metabolic process	34/210	30247/2186140.5	0	0	34	control_ii
GO:0002793	positive regulation of peptide secretion	14/595	30247/2186140.5	0.0404236	0.0607589	14	control_ii
GO:0006813	potassium ion transport	24/741	30247/2186140.5	0.000151515	0.000268238	24	control_ii
GO:0010737	protein kinase A signaling	3/36	30247/2186140.5	0.0134557	0.0206812	3	control_ii
GO:0031099	regeneration	34/378	30247/2186140.5	0	0	34	control_ii
GO:1904062	regulation of cation transmembrane transport	60/780	30247/2186140.5	0	0	60	control_ii
GO:0051480	regulation of cytosolic calcium ion concentration	28/946	30247/2186140.5	0.000201457	0.000354032	28	control_ii
GO:0034114	regulation of heterotypic cell-cell adhesion	3/21	30247/2186140.5	0.00292267	0.00471971	3	control_ii
GO:0010959	regulation of metal ion transport	76/990	30247/2186140.5	0	0	76	control_ii
GO:1901739	regulation of myoblast fusion	4/21	30247/2186140.5	0.000181611	0.000320333	4	control_ii
GO:0010830	regulation of myotube differentiation	16/78	30247/2186140.5	1.37668e-14	4.41645e-14	16	control_ii
GO:0052547	regulation of peptidase activity	30/1540	30247/2186140.5	0.042398	0.0629387	30	control_ii
GO:0090276	regulation of peptide hormone secretion	15/435	30247/2186140.5	0.0013175	0.0021943	15	control_ii
GO:0002791	regulation of peptide secretion	65/1711	30247/2186140.5	1.2268e-12	3.68811e-12	65	control_ii
GO:0050708	regulation of protein secretion	57/1275	30247/2186140.5	4.57412e-14	1.42904e-13	57	control_ii
GO:1903034	regulation of response to wounding	9/325	30247/2186140.5	0.0389665	0.058757	9	control_ii
GO:0051282	regulation of sequestering of calcium ion	16/210	30247/2186140.5	5.44866e-08	1.35649e-07	16	control_ii
GO:0032409	regulation of transporter activity	50/528	30247/2186140.5	0	0	50	control_ii
GO:0061041	regulation of wound healing	9/276	30247/2186140.5	0.0157235	0.0240891	9	control_ii
GO:0051209	release of sequestered calcium ion into cytosol	16/210	30247/2186140.5	5.44866e-08	1.35649e-07	16	control_ii
GO:0014808	release of sequestered calcium ion into cytosol by sarcoplasmic reticulum	5/36	30247/2186140.5	0.000133632	0.000238343	5	control_ii
GO:0097305	response to alcohol	26/406	30247/2186140.5	2.08622e-10	5.76425e-10	26	control_ii
GO:0031960	response to corticosteroid	10/276	30247/2186140.5	0.00561854	0.00886358	10	control_ii
GO:0009991	response to extracellular stimulus	68/1540	30247/2186140.5	3.33067e-16	1.12912e-15	68	control_ii
GO:0033762	response to glucagon	6/78	30247/2186140.5	0.000769175	0.00129917	6	control_ii
GO:0051384	response to glucocorticoid	10/253	30247/2186140.5	0.00307046	0.0049251	10	control_ii
GO:0009749	response to glucose	19/378	30247/2186140.5	2.07366e-06	4.74263e-06	19	control_ii
GO:0031667	response to nutrient levels	67/1431	30247/2186140.5	0	0	67	control_ii
GO:0032526	response to retinoic acid	10/153	30247/2186140.5	6.11953e-05	0.000113377	10	control_ii
GO:0009410	response to xenobiotic stimulus	14/231	30247/2186140.5	5.40325e-06	1.20128e-05	14	control_ii
GO:0051208	sequestering of calcium ion	16/210	30247/2186140.5	5.44866e-08	1.35649e-07	16	control_ii
GO:0023061	signal release	45/1770	30247/2186140.5	0.000113419	0.000203577	45	control_ii
GO:0006949	syncytium formation	11/66	30247/2186140.5	1.89363e-09	4.94621e-09	11	control_ii
GO:0000768	syncytium formation by plasma membrane fusion	11/66	30247/2186140.5	1.89363e-09	4.94621e-09	11	control_ii
GO:0042246	tissue regeneration	19/78	30247/2186140.5	0	0	19	control_ii
GO:0070328	triglyceride homeostasis	6/36	30247/2186140.5	9.56153e-06	1.93662e-05	6	control_ii
GO:0006805	xenobiotic metabolic process	14/190	30247/2186140.5	5.42383e-07	1.28346e-06	14	control_ii
GO:0070588	calcium ion transmembrane transport	47/741	27346/1268824.5	1.21802e-10	2.74877e-10	47	control_iii
GO:0003206	cardiac chamber morphogenesis	23/171	27346/1268824.5	4.01401e-12	9.85794e-12	23	control_iii
GO:0055007	cardiac muscle cell differentiation	37/153	27346/1268824.5	0	0	37	control_iii
GO:0071229	cellular response to acid chemical	29/325	27346/1268824.5	2.04573e-10	4.49522e-10	29	control_iii
GO:0071398	cellular response to fatty acid	7/55	27346/1268824.5	0.000176889	0.000282683	7	control_iii
GO:0045980	negative regulation of nucleotide metabolic process	5/78	27346/1268824.5	0.0268669	0.0367768	5	control_iii
GO:1900543	negative regulation of purine nucleotide metabolic process	5/78	27346/1268824.5	0.0268669	0.0367768	5	control_iii
GO:0035265	organ growth	15/231	27346/1268824.5	0.000174833	0.000282683	15	control_iii
GO:1903169	regulation of calcium ion transmembrane transport	23/190	27346/1268824.5	3.59097e-11	8.21496e-11	23	control_iii
GO:2001257	regulation of cation channel activity	14/253	27346/1268824.5	0.00135367	0.00200945	14	control_iii
GO:0032412	regulation of ion transmembrane transporter activity	34/406	27346/1268824.5	3.39433e-11	7.87296e-11	34	control_iii
GO:0010880	regulation of release of sequestered calcium ion into cytosol by sarcoplasmic reticulum	3/28	27346/1268824.5	0.0219415	0.0302829	3	control_iii
GO:0022898	regulation of transmembrane transporter activity	34/406	27346/1268824.5	3.39433e-11	7.87296e-11	34	control_iii
GO:1903514	release of sequestered calcium ion into cytosol by endoplasmic reticulum	5/36	27346/1268824.5	0.00100387	0.00149685	5	control_iii
GO:0070542	response to fatty acid	24/120	27346/1268824.5	2.22045e-16	6.50552e-16	24	control_iii
GO:0009612	response to mechanical stimulus	20/378	27346/1268824.5	0.000263399	0.000418931	20	control_iii
GO:0046463	acylglycerol biosynthetic process	14/36	32086/1184260.5	2.47802e-13	1.09821e-12	14	control_iv
GO:0046942	carboxylic acid transport	67/595	32086/1184260.5	0	0	67	control_iv
GO:0003300	cardiac muscle hypertrophy	22/120	32086/1184260.5	1.6086e-12	6.81907e-12	22	control_iv
GO:0035051	cardiocyte differentiation	31/276	32086/1184260.5	3.87785e-11	1.5328e-10	31	control_iv
GO:0016049	cell growth	42/1176	32086/1184260.5	0.0461539	0.083077	42	control_iv
GO:0048469	cell maturation	14/253	32086/1184260.5	0.00984197	0.0195171	14	control_iv
GO:0034754	cellular hormone metabolic process	12/153	32086/1184260.5	0.00101484	0.00236526	12	control_iv
GO:0071320	cellular response to cAMP	6/66	32086/1184260.5	0.0089755	0.0179204	6	control_iv
GO:0097009	energy homeostasis	3/28	32086/1184260.5	0.0393456	0.0712606	3	control_iv
GO:0006067	ethanol metabolic process	4/21	32086/1184260.5	0.00222806	0.00488668	4	control_iv
GO:0015909	long-chain fatty acid transport	23/66	32086/1184260.5	0	0	23	control_iv
GO:0015718	monocarboxylic acid transport	51/231	32086/1184260.5	0	0	51	control_iv
GO:0043500	muscle adaptation	39/153	32086/1184260.5	0	0	39	control_iv
GO:0014896	muscle hypertrophy	22/136	32086/1184260.5	2.14828e-11	8.6672e-11	22	control_iv
GO:0051926	negative regulation of calcium ion transport	9/66	32086/1184260.5	7.20173e-05	0.000194148	9	control_iv
GO:0043271	negative regulation of ion transport	15/190	32086/1184260.5	0.000237825	0.000592032	15	control_iv
GO:0046460	neutral lipid biosynthetic process	14/36	32086/1184260.5	2.47802e-13	1.09821e-12	14	control_iv
GO:0048709	oligodendrocyte differentiation	7/91	32086/1184260.5	0.0119887	0.023614	7	control_iv
GO:0015849	organic acid transport	67/630	32086/1184260.5	0	0	67	control_iv
GO:0051197	positive regulation of coenzyme metabolic process	5/21	32086/1184260.5	0.000206491	0.000518442	5	control_iv
GO:0051194	positive regulation of cofactor metabolic process	5/21	32086/1184260.5	0.000206491	0.000518442	5	control_iv
GO:0048639	positive regulation of developmental growth	19/253	32086/1184260.5	7.44526e-05	0.000196193	19	control_iv
GO:0045923	positive regulation of fatty acid metabolic process	6/28	32086/1184260.5	8.90854e-05	0.000231622	6	control_iv
GO:0045821	positive regulation of glycolytic process	5/15	32086/1184260.5	3.49061e-05	9.58689e-05	5	control_iv
GO:0045927	positive regulation of growth	30/465	32086/1184260.5	1.54694e-05	4.37177e-05	30	control_iv
GO:0060421	positive regulation of heart growth	4/45	32086/1184260.5	0.0332777	0.0619983	4	control_iv
GO:0032103	positive regulation of response to external stimulus	21/496	32086/1184260.5	0.031714	0.0598474	21	control_iv
GO:0034764	positive regulation of transmembrane transport	15/171	32086/1184260.5	7.40164e-05	0.000195926	15	control_iv
GO:1903115	regulation of actin filament-based movement	6/45	32086/1184260.5	0.00130015	0.0030182	6	control_iv
GO:0090066	regulation of anatomical structure size	54/1128	32086/1184260.5	6.18698e-05	0.000168343	54	control_iv
GO:1901019	regulation of calcium ion transmembrane transporter activity	14/91	32086/1184260.5	1.72008e-07	5.71733e-07	14	control_iv
GO:0051924	regulation of calcium ion transport	29/406	32086/1184260.5	3.10942e-06	9.32825e-06	29	control_iv
GO:0050848	regulation of calcium-mediated signaling	7/91	32086/1184260.5	0.0119887	0.023614	7	control_iv
GO:0043949	regulation of cAMP-mediated signaling	4/21	32086/1184260.5	0.00222806	0.00488668	4	control_iv
GO:0055117	regulation of cardiac muscle contraction	11/120	32086/1184260.5	0.000445112	0.00107599	11	control_iv
GO:0051302	regulation of cell division	30/190	32086/1184260.5	1.06581e-14	4.83334e-14	30	control_iv
GO:0001558	regulation of cell growth	32/820	32086/1184260.5	0.027843	0.0534038	32	control_iv
GO:0048638	regulation of developmental growth	51/595	32086/1184260.5	1.19749e-12	5.11335e-12	51	control_iv
GO:0046320	regulation of fatty acid oxidation	10/28	32086/1184260.5	1.78479e-09	6.28978e-09	10	control_iv
GO:0060191	regulation of lipase activity	6/91	32086/1184260.5	0.0375181	0.0690191	6	control_iv
GO:0046890	regulation of lipid biosynthetic process	65/231	32086/1184260.5	0	0	65	control_iv
GO:0050746	regulation of lipoprotein metabolic process	3/15	32086/1184260.5	0.00708646	0.0145971	3	control_iv
GO:0090266	regulation of mitotic cell cycle spindle assembly checkpoint	3/15	32086/1184260.5	0.00708646	0.0145971	3	control_iv
GO:1903504	regulation of mitotic spindle checkpoint	3/15	32086/1184260.5	0.00708646	0.0145971	3	control_iv
GO:0043502	regulation of muscle adaptation	36/120	32086/1184260.5	0	0	36	control_iv
GO:0048634	regulation of muscle organ development	19/231	32086/1184260.5	2.1671e-05	6.03693e-05	19	control_iv
GO:1901861	regulation of muscle tissue development	19/210	32086/1184260.5	5.60989e-06	1.62464e-05	19	control_iv
GO:0060314	regulation of ryanodine-sensitive calcium-release channel activity	5/36	32086/1184260.5	0.00273116	0.00596167	5	control_iv
GO:0090231	regulation of spindle checkpoint	3/15	32086/1184260.5	0.00708646	0.0145971	3	control_iv
GO:0016202	regulation of striated muscle tissue development	19/210	32086/1184260.5	5.60989e-06	1.62464e-05	19	control_iv
GO:0090075	relaxation of muscle	4/28	32086/1184260.5	0.00655807	0.0137508	4	control_iv
GO:0070482	response to oxygen levels	38/903	32086/1184260.5	0.00600078	0.0126668	38	control_iv
GO:0014897	striated muscle hypertrophy	22/136	32086/1184260.5	2.14828e-11	8.6672e-11	22	control_iv
GO:0050808	synapse organization	21/465	32086/1184260.5	0.0172352	0.0331665	21	control_iv
GO:0007178	transmembrane receptor protein serine/threonine kinase signaling pathway	27/630	32086/1184260.5	0.0146075	0.0284846	27	control_iv
GO:0019432	triglyceride biosynthetic process	14/36	32086/1184260.5	2.47802e-13	1.09821e-12	14	control_iv

## Sheet: COAD_Stage
ID	Description	GPRatio	BgRatio	pvalue	p.adjust	GOcount	Stages
	disappear gradually in stage i
GO:0006639	acylglycerol metabolic process	19/190	49588/2993904.5	6.25379e-10	1.57806e-09	19	control_i
GO:0007188	adenylate cyclase-modulating G-protein coupled receptor signaling pathway	22/276	49588/2993904.5	2.19628e-09	5.44033e-09	22	control_i
GO:0008344	adult locomotory behavior	19/91	49588/2993904.5	8.88178e-16	2.78847e-15	19	control_i
GO:0015696	ammonium transport	30/120	49588/2993904.5	0	0	30	control_i
GO:0015701	bicarbonate transport	16/91	49588/2993904.5	2.57283e-12	7.5507e-12	16	control_i
GO:0015721	bile acid and bile salt transport	3/45	49588/2993904.5	0.0385007	0.0600878	3	control_i
GO:0030509	BMP signaling pathway	11/253	49588/2993904.5	0.00367109	0.00615648	11	control_i
GO:0097553	calcium ion transmembrane import into cytosol	30/210	49588/2993904.5	0	0	30	control_i
GO:1905039	carboxylic acid transmembrane transport	13/190	49588/2993904.5	2.0587e-05	3.97034e-05	13	control_i
GO:0060536	cartilage morphogenesis	3/15	49588/2993904.5	0.0017806	0.0030818	3	control_i
GO:0050432	catecholamine secretion	9/66	49588/2993904.5	1.47996e-06	2.982e-06	9	control_i
GO:0052695	cellular glucuronidation	2/21	49588/2993904.5	0.046778	0.0713563	2	control_i
GO:0030004	cellular monovalent inorganic cation homeostasis	17/153	49588/2993904.5	9.65065e-10	2.41266e-09	17	control_i
GO:0071773	cellular response to BMP stimulus	22/351	49588/2993904.5	1.60535e-07	3.41294e-07	22	control_i
GO:0021953	central nervous system neuron differentiation	10/276	49588/2993904.5	0.0178925	0.0287557	10	control_i
GO:0030301	cholesterol transport	8/105	49588/2993904.5	0.000379793	0.000683628	8	control_i
GO:0019935	cyclic-nucleotide-mediated signaling	11/153	49588/2993904.5	5.56328e-05	0.000105041	11	control_i
GO:0006835	dicarboxylic acid transport	7/105	49588/2993904.5	0.00189414	0.00323682	7	control_i
GO:0007586	digestion	38/820	49588/2993904.5	2.86352e-08	6.66509e-08	38	control_i
GO:0016101	diterpenoid metabolic process	15/153	49588/2993904.5	4.99773e-08	1.12449e-07	15	control_i
GO:0007588	excretion	11/136	49588/2993904.5	1.87584e-05	3.64372e-05	11	control_i
GO:0007631	feeding behavior	22/406	49588/2993904.5	1.82227e-06	3.64454e-06	22	control_i
GO:0007187	G-protein coupled receptor signaling pathway, coupled to cyclic nucleotide second messenger	22/351	49588/2993904.5	1.60535e-07	3.41294e-07	22	control_i
GO:0046503	glycerolipid catabolic process	11/78	49588/2993904.5	7.20354e-08	1.6074e-07	11	control_i
GO:0042445	hormone metabolic process	16/465	49588/2993904.5	0.00545621	0.00903789	16	control_i
GO:0015698	inorganic anion transport	15/528	49588/2993904.5	0.0325576	0.0520152	15	control_i
GO:0045104	intermediate filament cytoskeleton organization	10/66	49588/2993904.5	1.40501e-07	3.0593e-07	10	control_i
GO:0045103	intermediate filament-based process	10/66	49588/2993904.5	1.40501e-07	3.0593e-07	10	control_i
GO:0050892	intestinal absorption	5/66	49588/2993904.5	0.00482309	0.00803848	5	control_i
GO:0006720	isoprenoid metabolic process	28/190	49588/2993904.5	0	0	28	control_i
GO:0016042	lipid catabolic process	58/741	49588/2993904.5	0	0	58	control_i
GO:0042157	lipoprotein metabolic process	13/325	49588/2993904.5	0.00342986	0.00578788	13	control_i
GO:0007613	memory	19/153	49588/2993904.5	1.44533e-11	4.02309e-11	19	control_i
GO:0060485	mesenchyme development	21/561	49588/2993904.5	0.000579389	0.00103599	21	control_i
GO:0015844	monoamine transport	15/91	49588/2993904.5	3.23666e-11	8.91732e-11	15	control_i
GO:0048871	multicellular organismal homeostasis	27/861	49588/2993904.5	0.00153192	0.00268584	27	control_i
GO:0045776	negative regulation of blood pressure	7/66	49588/2993904.5	0.000113206	0.000207929	7	control_i
GO:0097756	negative regulation of blood vessel diameter	10/136	49588/2993904.5	9.92379e-05	0.000184788	10	control_i
GO:0006638	neutral lipid metabolic process	19/190	49588/2993904.5	6.25379e-10	1.57806e-09	19	control_i
GO:0006730	one-carbon metabolic process	10/36	49588/2993904.5	2.66164e-10	6.97713e-10	10	control_i
GO:1903825	organic acid transmembrane transport	13/210	49588/2993904.5	5.81018e-05	0.000108941	13	control_i
GO:0015850	organic hydroxy compound transport	77/946	49588/2993904.5	0	0	77	control_i
GO:0033700	phospholipid efflux	3/15	49588/2993904.5	0.0017806	0.0030818	3	control_i
GO:0002576	platelet degranulation	10/190	49588/2993904.5	0.00139274	0.00247395	10	control_i
GO:0051954	positive regulation of amine transport	9/45	49588/2993904.5	4.84536e-08	1.10868e-07	9	control_i
GO:0034767	positive regulation of ion transmembrane transport	40/190	49588/2993904.5	0	0	40	control_i
GO:0008217	regulation of blood pressure	39/561	49588/2993904.5	1.4988e-13	4.44699e-13	39	control_i
GO:0097746	regulation of blood vessel diameter	22/210	49588/2993904.5	1.15585e-11	3.25084e-11	22	control_i
GO:0050880	regulation of blood vessel size	23/253	49588/2993904.5	7.20525e-11	1.92616e-10	23	control_i
GO:0050433	regulation of catecholamine secretion	9/55	49588/2993904.5	2.99482e-07	6.17253e-07	9	control_i
GO:0010817	regulation of hormone levels	131/2278	49588/2993904.5	0	0	131	control_i
GO:0050994	regulation of lipid catabolic process	7/55	49588/2993904.5	3.45616e-05	6.57156e-05	7	control_i
GO:1905952	regulation of lipid localization	18/210	49588/2993904.5	1.99078e-08	4.79921e-08	18	control_i
GO:1902305	regulation of sodium ion transmembrane transport	18/66	49588/2993904.5	0	0	18	control_i
GO:0032228	regulation of synaptic transmission, GABAergic	6/36	49588/2993904.5	2.62307e-05	5.02289e-05	6	control_i
GO:0003073	regulation of systemic arterial blood pressure	6/153	49588/2993904.5	0.0429168	0.0662144	6	control_i
GO:0003044	regulation of systemic arterial blood pressure mediated by a chemical signal	4/78	49588/2993904.5	0.0408817	0.0634372	4	control_i
GO:0002026	regulation of the force of heart contraction	3/28	49588/2993904.5	0.0109251	0.0178775	3	control_i
GO:0090092	regulation of transmembrane receptor protein serine/threonine kinase signaling pathway	16/406	49588/2993904.5	0.00146674	0.00258837	16	control_i
GO:0035296	regulation of tube diameter	22/210	49588/2993904.5	1.15585e-11	3.25084e-11	22	control_i
GO:0035150	regulation of tube size	23/253	49588/2993904.5	7.20525e-11	1.92616e-10	23	control_i
GO:0019229	regulation of vasoconstriction	7/78	49588/2993904.5	0.000323254	0.000585762	7	control_i
GO:0071772	response to BMP	22/351	49588/2993904.5	1.60535e-07	3.41294e-07	22	control_i
GO:0042493	response to drug	50/990	49588/2993904.5	1.1106e-11	3.19002e-11	50	control_i
GO:0009991	response to extracellular stimulus	46/1225	49588/2993904.5	5.02998e-07	1.02886e-06	46	control_i
GO:0007584	response to nutrient	17/300	49588/2993904.5	1.45248e-05	2.86255e-05	17	control_i
GO:0031667	response to nutrient levels	37/1128	49588/2993904.5	0.000102023	0.000188672	37	control_i
GO:0001523	retinoid metabolic process	15/153	49588/2993904.5	4.99773e-08	1.12449e-07	15	control_i
GO:0090596	sensory organ morphogenesis	17/561	49588/2993904.5	0.0139169	0.0226359	17	control_i
GO:0048863	stem cell differentiation	16/528	49588/2993904.5	0.0166432	0.0269081	16	control_i
GO:0008202	steroid metabolic process	78/741	49588/2993904.5	0	0	78	control_i
GO:0006721	terpenoid metabolic process	28/190	49588/2993904.5	0	0	28	control_i
GO:0007178	transmembrane receptor protein serine/threonine kinase signaling pathway	24/780	49588/2993904.5	0.00340043	0.00577432	24	control_i
GO:0006641	triglyceride metabolic process	19/190	49588/2993904.5	6.25379e-10	1.57806e-09	19	control_i
GO:0035239	tube morphogenesis	47/780	49588/2993904.5	1.01696e-13	3.05089e-13	47	control_i
GO:0001655	urogenital system development	20/666	49588/2993904.5	0.00898391	0.0147906	20	control_i
GO:0042310	vasoconstriction	7/105	49588/2993904.5	0.00189414	0.00323682	7	control_i
GO:0051180	vitamin transport	3/45	49588/2993904.5	0.0385007	0.0600878	3	control_i
	disappear gradually in stage ii
GO:0030048	actin filament-based movement	34/190	41066/2558322	0	0	34	control_ii
GO:0070252	actin-mediated cell contraction	34/171	41066/2558322	0	0	34	control_ii
GO:0007411	axon guidance	57/595	41066/2558322	0	0	57	control_ii
GO:0043010	camera-type eye development	19/630	41066/2558322	0.0075302	0.0183759	19	control_ii
GO:0033500	carbohydrate homeostasis	39/406	41066/2558322	0	0	39	control_ii
GO:0003205	cardiac chamber development	10/231	41066/2558322	0.00454297	0.0113401	10	control_ii
GO:0001678	cellular glucose homeostasis	22/231	41066/2558322	4.17277e-11	1.66402e-10	22	control_ii
GO:0071322	cellular response to carbohydrate stimulus	20/231	41066/2558322	1.66598e-09	5.79548e-09	20	control_ii
GO:0071333	cellular response to glucose stimulus	20/210	41066/2558322	3.12705e-10	1.17534e-09	20	control_ii
GO:0071331	cellular response to hexose stimulus	20/231	41066/2558322	1.66598e-09	5.79548e-09	20	control_ii
GO:0071326	cellular response to monosaccharide stimulus	20/231	41066/2558322	1.66598e-09	5.79548e-09	20	control_ii
GO:0050886	endocrine process	7/171	41066/2558322	0.0212362	0.0489032	7	control_ii
GO:0060562	epithelial tube morphogenesis	34/820	41066/2558322	9.00113e-07	2.80321e-06	34	control_ii
GO:0001654	eye development	41/820	41066/2558322	4.00658e-10	1.48881e-09	41	control_ii
GO:0030900	forebrain development	34/1035	41066/2558322	0.00010371	0.000292356	34	control_ii
GO:0042593	glucose homeostasis	39/406	41066/2558322	0	0	39	control_ii
GO:0001822	kidney development	16/496	41066/2558322	0.00739841	0.0181901	16	control_ii
GO:0030324	lung development	16/253	41066/2558322	4.47792e-06	1.35582e-05	16	control_ii
GO:0051705	multi-organism behavior	11/91	41066/2558322	2.64653e-07	8.4021e-07	11	control_ii
GO:0097485	neuron projection guidance	57/595	41066/2558322	0	0	57	control_ii
GO:0042133	neurotransmitter metabolic process	3/28	41066/2558322	0.0100396	0.0239631	3	control_ii
GO:0042475	odontogenesis of dentin-containing tooth	5/120	41066/2558322	0.0448377	0.0977462	5	control_ii
GO:0030072	peptide hormone secretion	34/465	41066/2558322	5.47118e-13	2.35405e-12	34	control_ii
GO:0034310	primary alcohol catabolic process	2/15	41066/2558322	0.0235501	0.0538522	2	control_ii
GO:0050795	regulation of behavior	5/78	41066/2558322	0.00854145	0.0206893	5	control_ii
GO:0090276	regulation of peptide hormone secretion	25/351	41066/2558322	1.01239e-09	3.67835e-09	25	control_ii
GO:0072001	renal system development	20/561	41066/2558322	0.000954422	0.00247695	20	control_ii
GO:0060541	respiratory system development	23/378	41066/2558322	8.35847e-08	2.70616e-07	23	control_ii
GO:0033273	response to vitamin	5/120	41066/2558322	0.0448377	0.0977462	5	control_ii
GO:0019233	sensory perception of pain	6/120	41066/2558322	0.0132524	0.0314024	6	control_ii
GO:0060538	skeletal muscle organ development	31/253	41066/2558322	0	0	31	control_ii
	disappear gradually in stage iii
GO:0051937	catecholamine transport	4/78	29085/2409012.5	0.0149446	0.0399642	4	control_iii
GO:0060986	endocrine hormone secretion	3/55	29085/2409012.5	0.028989	0.0711278	3	control_iii
GO:0009812	flavonoid metabolic process	5/21	29085/2409012.5	4.44064e-06	1.70463e-05	5	control_iii
GO:0019585	glucuronate metabolic process	4/45	29085/2409012.5	0.00213331	0.00659388	4	control_iii
GO:0001656	metanephros development	5/153	29085/2409012.5	0.0389166	0.0926581	5	control_iii
GO:0045745	positive regulation of G-protein coupled receptor protein signaling pathway	3/45	29085/2409012.5	0.0171262	0.0443047	3	control_iii
GO:0008277	regulation of G-protein coupled receptor protein signaling pathway	8/190	29085/2409012.5	0.00236009	0.00720131	8	control_iii
GO:0006063	uronic acid metabolic process	4/45	29085/2409012.5	0.00213331	0.00659388	4	control_iii
	disappear gradually in stage iv
GO:0019731	antibacterial humoral response	6/55	30163/1479200	0.000885309	0.00248536	6	control_iv
GO:0071466	cellular response to xenobiotic stimulus	15/171	30163/1479200	2.79066e-06	9.48825e-06	15	control_iv
GO:0021954	central nervous system neuron development	6/78	30163/1479200	0.00528192	0.0136972	6	control_iv
GO:0045109	intermediate filament organization	3/21	30163/1479200	0.0085659	0.021485	3	control_iv
GO:0030299	intestinal cholesterol absorption	4/21	30163/1479200	0.000783503	0.00226214	4	control_iv
GO:0098856	intestinal lipid absorption	4/21	30163/1479200	0.000783503	0.00226214	4	control_iv
GO:0044241	lipid digestion	4/28	30163/1479200	0.0023929	0.00642305	4	control_iv
GO:1904478	regulation of intestinal absorption	3/10	30163/1479200	0.000913653	0.00254162	3	control_iv
GO:0051966	regulation of synaptic transmission, glutamatergic	10/66	30163/1479200	9.23068e-07	3.24665e-06	10	control_iv
GO:0009410	response to xenobiotic stimulus	15/171	30163/1479200	2.79066e-06	9.48825e-06	15	control_iv
GO:0006805	xenobiotic metabolic process	15/153	30163/1479200	6.86419e-07	2.44237e-06	15	control_iv
	disappear gradually in total
GO:0006639	acylglycerol metabolic process	19/190	49588/2993904.5	6.25379e-10	1.57806e-09	19	control_i
GO:0007188	adenylate cyclase-modulating G-protein coupled receptor signaling pathway	22/276	49588/2993904.5	2.19628e-09	5.44033e-09	22	control_i
GO:0008344	adult locomotory behavior	19/91	49588/2993904.5	8.88178e-16	2.78847e-15	19	control_i
GO:0015696	ammonium transport	30/120	49588/2993904.5	0	0	30	control_i
GO:0015701	bicarbonate transport	16/91	49588/2993904.5	2.57283e-12	7.5507e-12	16	control_i
GO:0015721	bile acid and bile salt transport	3/45	49588/2993904.5	0.0385007	0.0600878	3	control_i
GO:0030509	BMP signaling pathway	11/253	49588/2993904.5	0.00367109	0.00615648	11	control_i
GO:0097553	calcium ion transmembrane import into cytosol	30/210	49588/2993904.5	0	0	30	control_i
GO:1905039	carboxylic acid transmembrane transport	13/190	49588/2993904.5	2.0587e-05	3.97034e-05	13	control_i
GO:0060536	cartilage morphogenesis	3/15	49588/2993904.5	0.0017806	0.0030818	3	control_i
GO:0050432	catecholamine secretion	9/66	49588/2993904.5	1.47996e-06	2.982e-06	9	control_i
GO:0052695	cellular glucuronidation	2/21	49588/2993904.5	0.046778	0.0713563	2	control_i
GO:0030004	cellular monovalent inorganic cation homeostasis	17/153	49588/2993904.5	9.65065e-10	2.41266e-09	17	control_i
GO:0071773	cellular response to BMP stimulus	22/351	49588/2993904.5	1.60535e-07	3.41294e-07	22	control_i
GO:0021953	central nervous system neuron differentiation	10/276	49588/2993904.5	0.0178925	0.0287557	10	control_i
GO:0030301	cholesterol transport	8/105	49588/2993904.5	0.000379793	0.000683628	8	control_i
GO:0019935	cyclic-nucleotide-mediated signaling	11/153	49588/2993904.5	5.56328e-05	0.000105041	11	control_i
GO:0006835	dicarboxylic acid transport	7/105	49588/2993904.5	0.00189414	0.00323682	7	control_i
GO:0007586	digestion	38/820	49588/2993904.5	2.86352e-08	6.66509e-08	38	control_i
GO:0016101	diterpenoid metabolic process	15/153	49588/2993904.5	4.99773e-08	1.12449e-07	15	control_i
GO:0007588	excretion	11/136	49588/2993904.5	1.87584e-05	3.64372e-05	11	control_i
GO:0007631	feeding behavior	22/406	49588/2993904.5	1.82227e-06	3.64454e-06	22	control_i
GO:0007187	G-protein coupled receptor signaling pathway, coupled to cyclic nucleotide second messenger	22/351	49588/2993904.5	1.60535e-07	3.41294e-07	22	control_i
GO:0046503	glycerolipid catabolic process	11/78	49588/2993904.5	7.20354e-08	1.6074e-07	11	control_i
GO:0042445	hormone metabolic process	16/465	49588/2993904.5	0.00545621	0.00903789	16	control_i
GO:0015698	inorganic anion transport	15/528	49588/2993904.5	0.0325576	0.0520152	15	control_i
GO:0045104	intermediate filament cytoskeleton organization	10/66	49588/2993904.5	1.40501e-07	3.0593e-07	10	control_i
GO:0045103	intermediate filament-based process	10/66	49588/2993904.5	1.40501e-07	3.0593e-07	10	control_i
GO:0050892	intestinal absorption	5/66	49588/2993904.5	0.00482309	0.00803848	5	control_i
GO:0006720	isoprenoid metabolic process	28/190	49588/2993904.5	0	0	28	control_i
GO:0016042	lipid catabolic process	58/741	49588/2993904.5	0	0	58	control_i
GO:0042157	lipoprotein metabolic process	13/325	49588/2993904.5	0.00342986	0.00578788	13	control_i
GO:0007613	memory	19/153	49588/2993904.5	1.44533e-11	4.02309e-11	19	control_i
GO:0060485	mesenchyme development	21/561	49588/2993904.5	0.000579389	0.00103599	21	control_i
GO:0015844	monoamine transport	15/91	49588/2993904.5	3.23666e-11	8.91732e-11	15	control_i
GO:0048871	multicellular organismal homeostasis	27/861	49588/2993904.5	0.00153192	0.00268584	27	control_i
GO:0045776	negative regulation of blood pressure	7/66	49588/2993904.5	0.000113206	0.000207929	7	control_i
GO:0097756	negative regulation of blood vessel diameter	10/136	49588/2993904.5	9.92379e-05	0.000184788	10	control_i
GO:0006638	neutral lipid metabolic process	19/190	49588/2993904.5	6.25379e-10	1.57806e-09	19	control_i
GO:0006730	one-carbon metabolic process	10/36	49588/2993904.5	2.66164e-10	6.97713e-10	10	control_i
GO:1903825	organic acid transmembrane transport	13/210	49588/2993904.5	5.81018e-05	0.000108941	13	control_i
GO:0015850	organic hydroxy compound transport	77/946	49588/2993904.5	0	0	77	control_i
GO:0033700	phospholipid efflux	3/15	49588/2993904.5	0.0017806	0.0030818	3	control_i
GO:0002576	platelet degranulation	10/190	49588/2993904.5	0.00139274	0.00247395	10	control_i
GO:0051954	positive regulation of amine transport	9/45	49588/2993904.5	4.84536e-08	1.10868e-07	9	control_i
GO:0034767	positive regulation of ion transmembrane transport	40/190	49588/2993904.5	0	0	40	control_i
GO:0008217	regulation of blood pressure	39/561	49588/2993904.5	1.4988e-13	4.44699e-13	39	control_i
GO:0097746	regulation of blood vessel diameter	22/210	49588/2993904.5	1.15585e-11	3.25084e-11	22	control_i
GO:0050880	regulation of blood vessel size	23/253	49588/2993904.5	7.20525e-11	1.92616e-10	23	control_i
GO:0050433	regulation of catecholamine secretion	9/55	49588/2993904.5	2.99482e-07	6.17253e-07	9	control_i
GO:0010817	regulation of hormone levels	131/2278	49588/2993904.5	0	0	131	control_i
GO:0050994	regulation of lipid catabolic process	7/55	49588/2993904.5	3.45616e-05	6.57156e-05	7	control_i
GO:1905952	regulation of lipid localization	18/210	49588/2993904.5	1.99078e-08	4.79921e-08	18	control_i
GO:1902305	regulation of sodium ion transmembrane transport	18/66	49588/2993904.5	0	0	18	control_i
GO:0032228	regulation of synaptic transmission, GABAergic	6/36	49588/2993904.5	2.62307e-05	5.02289e-05	6	control_i
GO:0003073	regulation of systemic arterial blood pressure	6/153	49588/2993904.5	0.0429168	0.0662144	6	control_i
GO:0003044	regulation of systemic arterial blood pressure mediated by a chemical signal	4/78	49588/2993904.5	0.0408817	0.0634372	4	control_i
GO:0002026	regulation of the force of heart contraction	3/28	49588/2993904.5	0.0109251	0.0178775	3	control_i
GO:0090092	regulation of transmembrane receptor protein serine/threonine kinase signaling pathway	16/406	49588/2993904.5	0.00146674	0.00258837	16	control_i
GO:0035296	regulation of tube diameter	22/210	49588/2993904.5	1.15585e-11	3.25084e-11	22	control_i
GO:0035150	regulation of tube size	23/253	49588/2993904.5	7.20525e-11	1.92616e-10	23	control_i
GO:0019229	regulation of vasoconstriction	7/78	49588/2993904.5	0.000323254	0.000585762	7	control_i
GO:0071772	response to BMP	22/351	49588/2993904.5	1.60535e-07	3.41294e-07	22	control_i
GO:0042493	response to drug	50/990	49588/2993904.5	1.1106e-11	3.19002e-11	50	control_i
GO:0009991	response to extracellular stimulus	46/1225	49588/2993904.5	5.02998e-07	1.02886e-06	46	control_i
GO:0007584	response to nutrient	17/300	49588/2993904.5	1.45248e-05	2.86255e-05	17	control_i
GO:0031667	response to nutrient levels	37/1128	49588/2993904.5	0.000102023	0.000188672	37	control_i
GO:0001523	retinoid metabolic process	15/153	49588/2993904.5	4.99773e-08	1.12449e-07	15	control_i
GO:0090596	sensory organ morphogenesis	17/561	49588/2993904.5	0.0139169	0.0226359	17	control_i
GO:0048863	stem cell differentiation	16/528	49588/2993904.5	0.0166432	0.0269081	16	control_i
GO:0008202	steroid metabolic process	78/741	49588/2993904.5	0	0	78	control_i
GO:0006721	terpenoid metabolic process	28/190	49588/2993904.5	0	0	28	control_i
GO:0007178	transmembrane receptor protein serine/threonine kinase signaling pathway	24/780	49588/2993904.5	0.00340043	0.00577432	24	control_i
GO:0006641	triglyceride metabolic process	19/190	49588/2993904.5	6.25379e-10	1.57806e-09	19	control_i
GO:0035239	tube morphogenesis	47/780	49588/2993904.5	1.01696e-13	3.05089e-13	47	control_i
GO:0001655	urogenital system development	20/666	49588/2993904.5	0.00898391	0.0147906	20	control_i
GO:0042310	vasoconstriction	7/105	49588/2993904.5	0.00189414	0.00323682	7	control_i
GO:0051180	vitamin transport	3/45	49588/2993904.5	0.0385007	0.0600878	3	control_i
GO:0030048	actin filament-based movement	34/190	41066/2558322	0	0	34	control_ii
GO:0070252	actin-mediated cell contraction	34/171	41066/2558322	0	0	34	control_ii
GO:0007411	axon guidance	57/595	41066/2558322	0	0	57	control_ii
GO:0043010	camera-type eye development	19/630	41066/2558322	0.0075302	0.0183759	19	control_ii
GO:0033500	carbohydrate homeostasis	39/406	41066/2558322	0	0	39	control_ii
GO:0003205	cardiac chamber development	10/231	41066/2558322	0.00454297	0.0113401	10	control_ii
GO:0001678	cellular glucose homeostasis	22/231	41066/2558322	4.17277e-11	1.66402e-10	22	control_ii
GO:0071322	cellular response to carbohydrate stimulus	20/231	41066/2558322	1.66598e-09	5.79548e-09	20	control_ii
GO:0071333	cellular response to glucose stimulus	20/210	41066/2558322	3.12705e-10	1.17534e-09	20	control_ii
GO:0071331	cellular response to hexose stimulus	20/231	41066/2558322	1.66598e-09	5.79548e-09	20	control_ii
GO:0071326	cellular response to monosaccharide stimulus	20/231	41066/2558322	1.66598e-09	5.79548e-09	20	control_ii
GO:0050886	endocrine process	7/171	41066/2558322	0.0212362	0.0489032	7	control_ii
GO:0060562	epithelial tube morphogenesis	34/820	41066/2558322	9.00113e-07	2.80321e-06	34	control_ii
GO:0001654	eye development	41/820	41066/2558322	4.00658e-10	1.48881e-09	41	control_ii
GO:0030900	forebrain development	34/1035	41066/2558322	0.00010371	0.000292356	34	control_ii
GO:0042593	glucose homeostasis	39/406	41066/2558322	0	0	39	control_ii
GO:0001822	kidney development	16/496	41066/2558322	0.00739841	0.0181901	16	control_ii
GO:0030324	lung development	16/253	41066/2558322	4.47792e-06	1.35582e-05	16	control_ii
GO:0051705	multi-organism behavior	11/91	41066/2558322	2.64653e-07	8.4021e-07	11	control_ii
GO:0097485	neuron projection guidance	57/595	41066/2558322	0	0	57	control_ii
GO:0042133	neurotransmitter metabolic process	3/28	41066/2558322	0.0100396	0.0239631	3	control_ii
GO:0042475	odontogenesis of dentin-containing tooth	5/120	41066/2558322	0.0448377	0.0977462	5	control_ii
GO:0030072	peptide hormone secretion	34/465	41066/2558322	5.47118e-13	2.35405e-12	34	control_ii
GO:0034310	primary alcohol catabolic process	2/15	41066/2558322	0.0235501	0.0538522	2	control_ii
GO:0050795	regulation of behavior	5/78	41066/2558322	0.00854145	0.0206893	5	control_ii
GO:0090276	regulation of peptide hormone secretion	25/351	41066/2558322	1.01239e-09	3.67835e-09	25	control_ii
GO:0072001	renal system development	20/561	41066/2558322	0.000954422	0.00247695	20	control_ii
GO:0060541	respiratory system development	23/378	41066/2558322	8.35847e-08	2.70616e-07	23	control_ii
GO:0033273	response to vitamin	5/120	41066/2558322	0.0448377	0.0977462	5	control_ii
GO:0019233	sensory perception of pain	6/120	41066/2558322	0.0132524	0.0314024	6	control_ii
GO:0060538	skeletal muscle organ development	31/253	41066/2558322	0	0	31	control_ii
GO:0051937	catecholamine transport	4/78	29085/2409012.5	0.0149446	0.0399642	4	control_iii
GO:0060986	endocrine hormone secretion	3/55	29085/2409012.5	0.028989	0.0711278	3	control_iii
GO:0009812	flavonoid metabolic process	5/21	29085/2409012.5	4.44064e-06	1.70463e-05	5	control_iii
GO:0019585	glucuronate metabolic process	4/45	29085/2409012.5	0.00213331	0.00659388	4	control_iii
GO:0001656	metanephros development	5/153	29085/2409012.5	0.0389166	0.0926581	5	control_iii
GO:0045745	positive regulation of G-protein coupled receptor protein signaling pathway	3/45	29085/2409012.5	0.0171262	0.0443047	3	control_iii
GO:0008277	regulation of G-protein coupled receptor protein signaling pathway	8/190	29085/2409012.5	0.00236009	0.00720131	8	control_iii
GO:0006063	uronic acid metabolic process	4/45	29085/2409012.5	0.00213331	0.00659388	4	control_iii
GO:0019731	antibacterial humoral response	6/55	30163/1479200	0.000885309	0.00248536	6	control_iv
GO:0071466	cellular response to xenobiotic stimulus	15/171	30163/1479200	2.79066e-06	9.48825e-06	15	control_iv
GO:0021954	central nervous system neuron development	6/78	30163/1479200	0.00528192	0.0136972	6	control_iv
GO:0045109	intermediate filament organization	3/21	30163/1479200	0.0085659	0.021485	3	control_iv
GO:0030299	intestinal cholesterol absorption	4/21	30163/1479200	0.000783503	0.00226214	4	control_iv
GO:0098856	intestinal lipid absorption	4/21	30163/1479200	0.000783503	0.00226214	4	control_iv
GO:0044241	lipid digestion	4/28	30163/1479200	0.0023929	0.00642305	4	control_iv
GO:1904478	regulation of intestinal absorption	3/10	30163/1479200	0.000913653	0.00254162	3	control_iv
GO:0051966	regulation of synaptic transmission, glutamatergic	10/66	30163/1479200	9.23068e-07	3.24665e-06	10	control_iv
GO:0009410	response to xenobiotic stimulus	15/171	30163/1479200	2.79066e-06	9.48825e-06	15	control_iv
GO:0006805	xenobiotic metabolic process	15/153	30163/1479200	6.86419e-07	2.44237e-06	15	control_iv

## Sheet: HNSC_Stage
ID	Description	GPRatio	BgRatio	pvalue	p.adjust	GOcount	Stages
	disappear gradually in stage i
GO:0006639	acylglycerol metabolic process	30/136	63235/873842	3.46145e-08	6.62514e-08	30	control_i
GO:1902476	chloride transmembrane transport	16/105	63235/873842	0.00363951	0.0053101	16	control_i
GO:0006821	chloride transport	16/120	63235/873842	0.01303	0.0185547	16	control_i
GO:0060285	cilium-dependent cell motility	15/28	63235/873842	1.17419e-10	2.58032e-10	15	control_i
GO:0070268	cornification	86/435	63235/873842	0	0	86	control_i
GO:0009913	epidermal cell differentiation	132/820	63235/873842	0	0	132	control_i
GO:0008544	epidermis development	143/1176	63235/873842	1.32701e-09	2.7466e-09	143	control_i
GO:0006006	glucose metabolic process	56/253	63235/873842	4.996e-14	1.28882e-13	56	control_i
GO:0003007	heart morphogenesis	71/325	63235/873842	0	0	71	control_i
GO:0019318	hexose metabolic process	56/325	63235/873842	1.50638e-09	3.08201e-09	56	control_i
GO:0031424	keratinization	130/630	63235/873842	0	0	130	control_i
GO:0030216	keratinocyte differentiation	130/666	63235/873842	0	0	130	control_i
GO:0005996	monosaccharide metabolic process	56/435	63235/873842	2.35503e-05	3.74281e-05	56	control_i
GO:0006638	neutral lipid metabolic process	30/136	63235/873842	3.46145e-08	6.62514e-08	30	control_i
GO:0051197	positive regulation of coenzyme metabolic process	13/21	63235/873842	1.74007e-10	3.73172e-10	13	control_i
GO:0051194	positive regulation of cofactor metabolic process	13/21	63235/873842	1.74007e-10	3.73172e-10	13	control_i
GO:0032411	positive regulation of transporter activity	19/91	63235/873842	2.39874e-05	3.77855e-05	19	control_i
GO:0014850	response to muscle activity	11/28	63235/873842	1.91362e-06	3.18341e-06	11	control_i
GO:0043588	skin development	148/1176	63235/873842	6.40208e-11	1.49943e-10	148	control_i
GO:0006641	triglyceride metabolic process	17/105	63235/873842	0.00142922	0.00210249	17	control_i
	disappear gradually in stage ii
GO:0051693	actin filament capping	6/36	60435/1110050	0.0123817	0.016251	6	control_ii
GO:0003208	cardiac ventricle morphogenesis	15/78	60435/1110050	1.80503e-05	2.56987e-05	15	control_ii
GO:0015669	gas transport	5/36	60435/1110050	0.0441766	0.054571	5	control_ii
GO:0030835	negative regulation of actin filament depolymerization	6/36	60435/1110050	0.0123817	0.016251	6	control_ii
GO:0015671	oxygen transport	5/28	60435/1110050	0.0164414	0.0214121	5	control_ii
GO:0009954	proximal/distal pattern formation	5/36	60435/1110050	0.0441766	0.054571	5	control_ii
GO:0051480	regulation of cytosolic calcium ion concentration	64/561	60435/1110050	2.93617e-08	4.52548e-08	64	control_ii
	disappear gradually in stage iii
GO:0003229	ventricular cardiac muscle tissue development	15/55	68510/1195058	3.12989e-07	5.24716e-07	15	control_iii
	disappear gradually in stage iv
	disappear gradually in total
GO:0006639	acylglycerol metabolic process	30/136	63235/873842	3.46145e-08	6.62514e-08	30	control_i
GO:1902476	chloride transmembrane transport	16/105	63235/873842	0.00363951	0.0053101	16	control_i
GO:0006821	chloride transport	16/120	63235/873842	0.01303	0.0185547	16	control_i
GO:0060285	cilium-dependent cell motility	15/28	63235/873842	1.17419e-10	2.58032e-10	15	control_i
GO:0070268	cornification	86/435	63235/873842	0	0	86	control_i
GO:0009913	epidermal cell differentiation	132/820	63235/873842	0	0	132	control_i
GO:0008544	epidermis development	143/1176	63235/873842	1.32701e-09	2.7466e-09	143	control_i
GO:0006006	glucose metabolic process	56/253	63235/873842	4.996e-14	1.28882e-13	56	control_i
GO:0003007	heart morphogenesis	71/325	63235/873842	0	0	71	control_i
GO:0019318	hexose metabolic process	56/325	63235/873842	1.50638e-09	3.08201e-09	56	control_i
GO:0031424	keratinization	130/630	63235/873842	0	0	130	control_i
GO:0030216	keratinocyte differentiation	130/666	63235/873842	0	0	130	control_i
GO:0005996	monosaccharide metabolic process	56/435	63235/873842	2.35503e-05	3.74281e-05	56	control_i
GO:0006638	neutral lipid metabolic process	30/136	63235/873842	3.46145e-08	6.62514e-08	30	control_i
GO:0051197	positive regulation of coenzyme metabolic process	13/21	63235/873842	1.74007e-10	3.73172e-10	13	control_i
GO:0051194	positive regulation of cofactor metabolic process	13/21	63235/873842	1.74007e-10	3.73172e-10	13	control_i
GO:0032411	positive regulation of transporter activity	19/91	63235/873842	2.39874e-05	3.77855e-05	19	control_i
GO:0014850	response to muscle activity	11/28	63235/873842	1.91362e-06	3.18341e-06	11	control_i
GO:0043588	skin development	148/1176	63235/873842	6.40208e-11	1.49943e-10	148	control_i
GO:0006641	triglyceride metabolic process	17/105	63235/873842	0.00142922	0.00210249	17	control_i
GO:0051693	actin filament capping	6/36	60435/1110050	0.0123817	0.016251	6	control_ii
GO:0003208	cardiac ventricle morphogenesis	15/78	60435/1110050	1.80503e-05	2.56987e-05	15	control_ii
GO:0015669	gas transport	5/36	60435/1110050	0.0441766	0.054571	5	control_ii
GO:0030835	negative regulation of actin filament depolymerization	6/36	60435/1110050	0.0123817	0.016251	6	control_ii
GO:0015671	oxygen transport	5/28	60435/1110050	0.0164414	0.0214121	5	control_ii
GO:0009954	proximal/distal pattern formation	5/36	60435/1110050	0.0441766	0.054571	5	control_ii
GO:0051480	regulation of cytosolic calcium ion concentration	64/561	60435/1110050	2.93617e-08	4.52548e-08	64	control_ii
GO:0003229	ventricular cardiac muscle tissue development	15/55	68510/1195058	3.12989e-07	5.24716e-07	15	control_iii

## Sheet: KIRC_Stage
ID	Description	GPRatio	BgRatio	pvalue	p.adjust	GOcount	Stages
	disappear gradually in stage i
GO:0006639	acylglycerol metabolic process	20/171	41680/1451808	1.32728e-07	7.52123e-07	20	control_i
GO:0097164	ammonium ion metabolic process	17/231	41680/1451808	0.000425118	0.00137313	17	control_i
GO:0001658	branching involved in ureteric bud morphogenesis	9/91	41680/1451808	0.00124546	0.00329019	9	control_i
GO:0048754	branching morphogenesis of an epithelial tube	13/171	41680/1451808	0.00143253	0.00364336	13	control_i
GO:0046942	carboxylic acid transport	84/703	41680/1451808	0	0	84	control_i
GO:0048738	cardiac muscle tissue development	14/276	41680/1451808	0.0299028	0.0542617	14	control_i
GO:0003208	cardiac ventricle morphogenesis	6/78	41680/1451808	0.0248356	0.0463693	6	control_i
GO:0009712	catechol-containing compound metabolic process	7/45	41680/1451808	0.000279494	0.000911885	7	control_i
GO:0006584	catecholamine metabolic process	7/45	41680/1451808	0.000279494	0.000911885	7	control_i
GO:0061005	cell differentiation involved in kidney development	8/66	41680/1451808	0.000600716	0.00183048	8	control_i
GO:0071804	cellular potassium ion transport	20/406	41680/1451808	0.0148809	0.0304211	20	control_i
GO:0070508	cholesterol import	2/10	41680/1451808	0.0318188	0.0558558	2	control_i
GO:0006835	dicarboxylic acid transport	13/105	41680/1451808	1.06368e-05	4.46193e-05	13	control_i
GO:0017144	drug metabolic process	5/28	41680/1451808	0.00110295	0.00299372	5	control_i
GO:0001838	embryonic epithelial tube formation	13/120	41680/1451808	4.47971e-05	0.000174331	13	control_i
GO:0035850	epithelial cell differentiation involved in kidney development	7/55	41680/1451808	0.000973896	0.00278379	7	control_i
GO:0050673	epithelial cell proliferation	30/595	41680/1451808	0.002518	0.00611514	30	control_i
GO:0072175	epithelial tube formation	18/153	41680/1451808	5.04108e-07	2.66929e-06	18	control_i
GO:0060562	epithelial tube morphogenesis	64/630	41680/1451808	0	0	64	control_i
GO:0030198	extracellular matrix organization	32/595	41680/1451808	0.000663338	0.00198387	32	control_i
GO:0043062	extracellular structure organization	32/595	41680/1451808	0.000663338	0.00198387	32	control_i
GO:0048732	gland development	34/741	41680/1451808	0.00589427	0.0132212	34	control_i
GO:0072311	glomerular epithelial cell differentiation	6/21	41680/1451808	2.09315e-05	8.45108e-05	6	control_i
GO:0072010	glomerular epithelium development	6/21	41680/1451808	2.09315e-05	8.45108e-05	6	control_i
GO:0072112	glomerular visceral epithelial cell differentiation	6/15	41680/1451808	2.23975e-06	1.13038e-05	6	control_i
GO:0032835	glomerulus development	12/91	41680/1451808	1.20159e-05	4.97581e-05	12	control_i
GO:0072012	glomerulus vasculature development	3/21	41680/1451808	0.0213761	0.0401424	3	control_i
GO:0046503	glycerolipid catabolic process	15/105	41680/1451808	3.58413e-07	1.96216e-06	15	control_i
GO:0034384	high-density lipoprotein particle clearance	2/10	41680/1451808	0.0318188	0.0558558	2	control_i
GO:0034375	high-density lipoprotein particle remodeling	3/15	41680/1451808	0.00830893	0.0175411	3	control_i
GO:0060993	kidney morphogenesis	35/276	41680/1451808	3.25517e-13	3.39168e-12	35	control_i
GO:0061440	kidney vasculature development	3/21	41680/1451808	0.0213761	0.0401424	3	control_i
GO:0010876	lipid localization	59/820	41680/1451808	2.72362e-10	2.25572e-09	59	control_i
GO:0006869	lipid transport	48/630	41680/1451808	1.902e-09	1.42871e-08	48	control_i
GO:0042157	lipoprotein metabolic process	16/231	41680/1451808	0.00117391	0.00315977	16	control_i
GO:0072070	loop of Henle development	3/15	41680/1451808	0.00830893	0.0175411	3	control_i
GO:0072163	mesonephric epithelium development	27/210	41680/1451808	1.11136e-10	9.70185e-10	27	control_i
GO:0072164	mesonephric tubule development	27/210	41680/1451808	1.11136e-10	9.70185e-10	27	control_i
GO:0072171	mesonephric tubule morphogenesis	10/105	41680/1451808	0.000916333	0.00264264	10	control_i
GO:0001823	mesonephros development	27/231	41680/1451808	9.5844e-10	7.37086e-09	27	control_i
GO:0072210	metanephric nephron development	6/91	41680/1451808	0.0473782	0.0784777	6	control_i
GO:0003338	metanephros morphogenesis	5/55	41680/1451808	0.0206785	0.0401424	5	control_i
GO:0015718	monocarboxylic acid transport	18/171	41680/1451808	2.56318e-06	1.18273e-05	18	control_i
GO:0061138	morphogenesis of a branching epithelium	19/300	41680/1451808	0.00125292	0.00329019	19	control_i
GO:0001763	morphogenesis of a branching structure	19/325	41680/1451808	0.00307242	0.00735106	19	control_i
GO:0016331	morphogenesis of embryonic epithelium	18/153	41680/1451808	5.04108e-07	2.66929e-06	18	control_i
GO:0044706	multi-multicellular organism process	21/300	41680/1451808	0.000193036	0.000656321	21	control_i
GO:0060537	muscle tissue development	34/741	41680/1451808	0.00589427	0.0132212	34	control_i
GO:0030195	negative regulation of blood coagulation	5/55	41680/1451808	0.0206785	0.0401424	5	control_i
GO:0050819	negative regulation of coagulation	5/66	41680/1451808	0.0411863	0.0707616	5	control_i
GO:0010951	negative regulation of endopeptidase activity	19/378	41680/1451808	0.014289	0.0295856	19	control_i
GO:1900047	negative regulation of hemostasis	5/55	41680/1451808	0.0206785	0.0401424	5	control_i
GO:0051346	negative regulation of hydrolase activity	54/946	41680/1451808	2.43781e-06	1.18273e-05	54	control_i
GO:0060192	negative regulation of lipase activity	3/21	41680/1451808	0.0213761	0.0401424	3	control_i
GO:0032369	negative regulation of lipid transport	3/28	41680/1451808	0.0454373	0.0764388	3	control_i
GO:0010466	negative regulation of peptidase activity	20/435	41680/1451808	0.0283556	0.051745	20	control_i
GO:0045861	negative regulation of proteolysis	25/528	41680/1451808	0.0113884	0.0237319	25	control_i
GO:0051048	negative regulation of secretion	19/276	41680/1451808	0.000465138	0.00145864	19	control_i
GO:0072088	nephron epithelium morphogenesis	18/171	41680/1451808	2.56318e-06	1.18273e-05	18	control_i
GO:0072028	nephron morphogenesis	21/190	41680/1451808	1.72393e-07	9.6005e-07	21	control_i
GO:0072080	nephron tubule development	34/253	41680/1451808	1.30007e-13	1.49972e-12	34	control_i
GO:0072079	nephron tubule formation	4/28	41680/1451808	0.00801565	0.0172604	4	control_i
GO:0072078	nephron tubule morphogenesis	18/171	41680/1451808	2.56318e-06	1.18273e-05	18	control_i
GO:0042136	neurotransmitter biosynthetic process	3/21	41680/1451808	0.0213761	0.0401424	3	control_i
GO:0042133	neurotransmitter metabolic process	5/36	41680/1451808	0.0034993	0.00813148	5	control_i
GO:0006638	neutral lipid metabolic process	20/171	41680/1451808	1.32728e-07	7.52123e-07	20	control_i
GO:0015849	organic acid transport	84/703	41680/1451808	0	0	84	control_i
GO:0015711	organic anion transport	181/1485	41680/1451808	0	0	181	control_i
GO:1901615	organic hydroxy compound metabolic process	134/1081	41680/1451808	0	0	134	control_i
GO:0015850	organic hydroxy compound transport	33/465	41680/1451808	2.69025e-06	1.20687e-05	33	control_i
GO:0035435	phosphate ion transmembrane transport	3/15	41680/1451808	0.00830893	0.0175411	3	control_i
GO:0006817	phosphate ion transport	4/21	41680/1451808	0.00274753	0.00662277	4	control_i
GO:0015914	phospholipid transport	10/55	41680/1451808	3.40274e-06	1.5056e-05	10	control_i
GO:0045940	positive regulation of steroid metabolic process	3/21	41680/1451808	0.0213761	0.0401424	3	control_i
GO:0071805	potassium ion transmembrane transport	20/406	41680/1451808	0.0148809	0.0304211	20	control_i
GO:0003002	regionalization	53/741	41680/1451808	2.57228e-09	1.8654e-08	53	control_i
GO:0010872	regulation of cholesterol esterification	3/10	41680/1451808	0.00243969	0.00596985	3	control_i
GO:0010817	regulation of hormone levels	43/1128	41680/1451808	0.0400367	0.0695261	43	control_i
GO:1904478	regulation of intestinal absorption	3/10	41680/1451808	0.00243969	0.00596985	3	control_i
GO:2000021	regulation of ion homeostasis	15/300	41680/1451808	0.0282221	0.051745	15	control_i
GO:1905952	regulation of lipid localization	13/153	41680/1451808	0.000511683	0.00158917	13	control_i
GO:0051004	regulation of lipoprotein lipase activity	4/28	41680/1451808	0.00801565	0.0172604	4	control_i
GO:0045661	regulation of myoblast differentiation	4/45	41680/1451808	0.0398322	0.0695261	4	control_i
GO:0001505	regulation of neurotransmitter levels	16/325	41680/1451808	0.0272284	0.0502559	16	control_i
GO:0061318	renal filtration cell differentiation	6/15	41680/1451808	2.23975e-06	1.13038e-05	6	control_i
GO:0061437	renal system vasculature development	3/21	41680/1451808	0.0213761	0.0401424	3	control_i
GO:0061326	renal tubule development	40/276	41680/1451808	0	0	40	control_i
GO:0061333	renal tubule morphogenesis	22/190	41680/1451808	3.85939e-08	2.4325e-07	22	control_i
GO:0048608	reproductive structure development	49/946	41680/1451808	7.87077e-05	0.000292214	49	control_i
GO:0061458	reproductive system development	49/946	41680/1451808	7.87077e-05	0.000292214	49	control_i
GO:0060541	respiratory system development	25/231	41680/1451808	1.86863e-08	1.23177e-07	25	control_i
GO:0042493	response to drug	55/861	41680/1451808	6.05805e-08	3.62361e-07	55	control_i
GO:0010038	response to metal ion	59/595	41680/1451808	4.44089e-16	5.9767e-15	59	control_i
GO:0010043	response to zinc ion	6/45	41680/1451808	0.0017435	0.00433192	6	control_i
GO:0050953	sensory perception of light stimulus	20/276	41680/1451808	0.000171741	0.00059013	20	control_i
GO:0055078	sodium ion homeostasis	12/78	41680/1451808	2.33414e-06	1.15989e-05	12	control_i
GO:0035376	sterol import	2/10	41680/1451808	0.0318188	0.0558558	2	control_i
GO:0006641	triglyceride metabolic process	20/153	41680/1451808	2.03864e-08	1.31696e-07	20	control_i
GO:0035148	tube formation	18/171	41680/1451808	2.56318e-06	1.18273e-05	18	control_i
GO:0035239	tube morphogenesis	69/780	41680/1451808	5.55112e-16	7.17204e-15	69	control_i
GO:0001657	ureteric bud development	27/210	41680/1451808	1.11136e-10	9.70185e-10	27	control_i
GO:0060675	ureteric bud morphogenesis	10/105	41680/1451808	0.000916333	0.00264264	10	control_i
GO:0007601	visual perception	18/253	41680/1451808	0.000439106	0.0013905	18	control_i
	disappear gradually in stage ii
GO:0071773	cellular response to BMP stimulus	13/253	58287/1918840.5	0.0471198	0.0697685	13	control_ii
GO:0042417	dopamine metabolic process	4/36	58287/1918840.5	0.0231331	0.0352255	4	control_ii
GO:0048871	multicellular organismal homeostasis	70/990	58287/1918840.5	1.58661e-10	3.63428e-10	70	control_ii
GO:0007218	neuropeptide signaling pathway	11/171	58287/1918840.5	0.015986	0.0249084	11	control_ii
GO:0055075	potassium ion homeostasis	3/15	58287/1918840.5	0.00969497	0.0154658	3	control_ii
GO:0071772	response to BMP	13/253	58287/1918840.5	0.0471198	0.0697685	13	control_ii
GO:0001894	tissue homeostasis	27/406	58287/1918840.5	0.000155412	0.000291261	27	control_ii
	disappear gradually in stage iii
GO:0030509	BMP signaling pathway	18/253	76079/1801202	0.0227166	0.0443571	18	control_iii
GO:0009713	catechol-containing compound biosynthetic process	4/28	76079/1801202	0.028985	0.0554301	4	control_iii
GO:0042423	catecholamine biosynthetic process	4/28	76079/1801202	0.028985	0.0554301	4	control_iii
GO:0098742	cell-cell adhesion via plasma-membrane adhesion molecules	34/496	76079/1801202	0.00443448	0.00945513	34	control_iii
GO:0042730	fibrinolysis	5/28	76079/1801202	0.00585347	0.0124093	5	control_iii
GO:0014014	negative regulation of gliogenesis	6/45	76079/1801202	0.0112408	0.0230405	6	control_iii
GO:0051055	negative regulation of lipid biosynthetic process	6/55	76079/1801202	0.0280833	0.0542651	6	control_iii
GO:0030100	regulation of endocytosis	33/406	76079/1801202	0.000313066	0.000712561	33	control_iii
GO:0014013	regulation of gliogenesis	13/153	76079/1801202	0.0133689	0.0269559	13	control_iii
	disappear gradually in stage iv
GO:0048736	appendage development	24/351	88999/2105352	0.0153236	0.0274099	24	control_iv
GO:0003231	cardiac ventricle development	15/210	88999/2105352	0.0343342	0.0583988	15	control_iv
GO:0006775	fat-soluble vitamin metabolic process	8/55	88999/2105352	0.00209878	0.0039586	8	control_iv
GO:0097154	GABAergic neuron differentiation	3/15	88999/2105352	0.0234625	0.0408184	3	control_iv
GO:0060173	limb development	24/351	88999/2105352	0.0153236	0.0274099	24	control_iv
GO:0032892	positive regulation of organic acid transport	9/36	88999/2105352	1.43189e-05	3.1718e-05	9	control_iv
GO:0002577	regulation of antigen processing and presentation	6/28	88999/2105352	0.000961228	0.00185903	6	control_iv
GO:0002664	regulation of T cell tolerance induction	3/15	88999/2105352	0.0234625	0.0408184	3	control_iv
GO:0002643	regulation of tolerance induction	4/28	88999/2105352	0.0290615	0.0501015	4	control_iv
GO:0043252	sodium-independent organic anion transport	18/36	88999/2105352	8.88178e-16	2.729e-15	18	control_iv
GO:0002517	T cell tolerance induction	4/21	88999/2105352	0.0107255	0.019459	4	control_iv
	disappear gradually in total
GO:0006639	acylglycerol metabolic process	20/171	41680/1451808	1.32728e-07	7.52123e-07	20	control_i
GO:0097164	ammonium ion metabolic process	17/231	41680/1451808	0.000425118	0.00137313	17	control_i
GO:0001658	branching involved in ureteric bud morphogenesis	9/91	41680/1451808	0.00124546	0.00329019	9	control_i
GO:0048754	branching morphogenesis of an epithelial tube	13/171	41680/1451808	0.00143253	0.00364336	13	control_i
GO:0046942	carboxylic acid transport	84/703	41680/1451808	0	0	84	control_i
GO:0048738	cardiac muscle tissue development	14/276	41680/1451808	0.0299028	0.0542617	14	control_i
GO:0003208	cardiac ventricle morphogenesis	6/78	41680/1451808	0.0248356	0.0463693	6	control_i
GO:0009712	catechol-containing compound metabolic process	7/45	41680/1451808	0.000279494	0.000911885	7	control_i
GO:0006584	catecholamine metabolic process	7/45	41680/1451808	0.000279494	0.000911885	7	control_i
GO:0061005	cell differentiation involved in kidney development	8/66	41680/1451808	0.000600716	0.00183048	8	control_i
GO:0071804	cellular potassium ion transport	20/406	41680/1451808	0.0148809	0.0304211	20	control_i
GO:0070508	cholesterol import	2/10	41680/1451808	0.0318188	0.0558558	2	control_i
GO:0006835	dicarboxylic acid transport	13/105	41680/1451808	1.06368e-05	4.46193e-05	13	control_i
GO:0017144	drug metabolic process	5/28	41680/1451808	0.00110295	0.00299372	5	control_i
GO:0001838	embryonic epithelial tube formation	13/120	41680/1451808	4.47971e-05	0.000174331	13	control_i
GO:0035850	epithelial cell differentiation involved in kidney development	7/55	41680/1451808	0.000973896	0.00278379	7	control_i
GO:0050673	epithelial cell proliferation	30/595	41680/1451808	0.002518	0.00611514	30	control_i
GO:0072175	epithelial tube formation	18/153	41680/1451808	5.04108e-07	2.66929e-06	18	control_i
GO:0060562	epithelial tube morphogenesis	64/630	41680/1451808	0	0	64	control_i
GO:0030198	extracellular matrix organization	32/595	41680/1451808	0.000663338	0.00198387	32	control_i
GO:0043062	extracellular structure organization	32/595	41680/1451808	0.000663338	0.00198387	32	control_i
GO:0048732	gland development	34/741	41680/1451808	0.00589427	0.0132212	34	control_i
GO:0072311	glomerular epithelial cell differentiation	6/21	41680/1451808	2.09315e-05	8.45108e-05	6	control_i
GO:0072010	glomerular epithelium development	6/21	41680/1451808	2.09315e-05	8.45108e-05	6	control_i
GO:0072112	glomerular visceral epithelial cell differentiation	6/15	41680/1451808	2.23975e-06	1.13038e-05	6	control_i
GO:0032835	glomerulus development	12/91	41680/1451808	1.20159e-05	4.97581e-05	12	control_i
GO:0072012	glomerulus vasculature development	3/21	41680/1451808	0.0213761	0.0401424	3	control_i
GO:0046503	glycerolipid catabolic process	15/105	41680/1451808	3.58413e-07	1.96216e-06	15	control_i
GO:0034384	high-density lipoprotein particle clearance	2/10	41680/1451808	0.0318188	0.0558558	2	control_i
GO:0034375	high-density lipoprotein particle remodeling	3/15	41680/1451808	0.00830893	0.0175411	3	control_i
GO:0060993	kidney morphogenesis	35/276	41680/1451808	3.25517e-13	3.39168e-12	35	control_i
GO:0061440	kidney vasculature development	3/21	41680/1451808	0.0213761	0.0401424	3	control_i
GO:0010876	lipid localization	59/820	41680/1451808	2.72362e-10	2.25572e-09	59	control_i
GO:0006869	lipid transport	48/630	41680/1451808	1.902e-09	1.42871e-08	48	control_i
GO:0042157	lipoprotein metabolic process	16/231	41680/1451808	0.00117391	0.00315977	16	control_i
GO:0072070	loop of Henle development	3/15	41680/1451808	0.00830893	0.0175411	3	control_i
GO:0072163	mesonephric epithelium development	27/210	41680/1451808	1.11136e-10	9.70185e-10	27	control_i
GO:0072164	mesonephric tubule development	27/210	41680/1451808	1.11136e-10	9.70185e-10	27	control_i
GO:0072171	mesonephric tubule morphogenesis	10/105	41680/1451808	0.000916333	0.00264264	10	control_i
GO:0001823	mesonephros development	27/231	41680/1451808	9.5844e-10	7.37086e-09	27	control_i
GO:0072210	metanephric nephron development	6/91	41680/1451808	0.0473782	0.0784777	6	control_i
GO:0003338	metanephros morphogenesis	5/55	41680/1451808	0.0206785	0.0401424	5	control_i
GO:0015718	monocarboxylic acid transport	18/171	41680/1451808	2.56318e-06	1.18273e-05	18	control_i
GO:0061138	morphogenesis of a branching epithelium	19/300	41680/1451808	0.00125292	0.00329019	19	control_i
GO:0001763	morphogenesis of a branching structure	19/325	41680/1451808	0.00307242	0.00735106	19	control_i
GO:0016331	morphogenesis of embryonic epithelium	18/153	41680/1451808	5.04108e-07	2.66929e-06	18	control_i
GO:0044706	multi-multicellular organism process	21/300	41680/1451808	0.000193036	0.000656321	21	control_i
GO:0060537	muscle tissue development	34/741	41680/1451808	0.00589427	0.0132212	34	control_i
GO:0030195	negative regulation of blood coagulation	5/55	41680/1451808	0.0206785	0.0401424	5	control_i
GO:0050819	negative regulation of coagulation	5/66	41680/1451808	0.0411863	0.0707616	5	control_i
GO:0010951	negative regulation of endopeptidase activity	19/378	41680/1451808	0.014289	0.0295856	19	control_i
GO:1900047	negative regulation of hemostasis	5/55	41680/1451808	0.0206785	0.0401424	5	control_i
GO:0051346	negative regulation of hydrolase activity	54/946	41680/1451808	2.43781e-06	1.18273e-05	54	control_i
GO:0060192	negative regulation of lipase activity	3/21	41680/1451808	0.0213761	0.0401424	3	control_i
GO:0032369	negative regulation of lipid transport	3/28	41680/1451808	0.0454373	0.0764388	3	control_i
GO:0010466	negative regulation of peptidase activity	20/435	41680/1451808	0.0283556	0.051745	20	control_i
GO:0045861	negative regulation of proteolysis	25/528	41680/1451808	0.0113884	0.0237319	25	control_i
GO:0051048	negative regulation of secretion	19/276	41680/1451808	0.000465138	0.00145864	19	control_i
GO:0072088	nephron epithelium morphogenesis	18/171	41680/1451808	2.56318e-06	1.18273e-05	18	control_i
GO:0072028	nephron morphogenesis	21/190	41680/1451808	1.72393e-07	9.6005e-07	21	control_i
GO:0072080	nephron tubule development	34/253	41680/1451808	1.30007e-13	1.49972e-12	34	control_i
GO:0072079	nephron tubule formation	4/28	41680/1451808	0.00801565	0.0172604	4	control_i
GO:0072078	nephron tubule morphogenesis	18/171	41680/1451808	2.56318e-06	1.18273e-05	18	control_i
GO:0042136	neurotransmitter biosynthetic process	3/21	41680/1451808	0.0213761	0.0401424	3	control_i
GO:0042133	neurotransmitter metabolic process	5/36	41680/1451808	0.0034993	0.00813148	5	control_i
GO:0006638	neutral lipid metabolic process	20/171	41680/1451808	1.32728e-07	7.52123e-07	20	control_i
GO:0015849	organic acid transport	84/703	41680/1451808	0	0	84	control_i
GO:0015711	organic anion transport	181/1485	41680/1451808	0	0	181	control_i
GO:1901615	organic hydroxy compound metabolic process	134/1081	41680/1451808	0	0	134	control_i
GO:0015850	organic hydroxy compound transport	33/465	41680/1451808	2.69025e-06	1.20687e-05	33	control_i
GO:0035435	phosphate ion transmembrane transport	3/15	41680/1451808	0.00830893	0.0175411	3	control_i
GO:0006817	phosphate ion transport	4/21	41680/1451808	0.00274753	0.00662277	4	control_i
GO:0015914	phospholipid transport	10/55	41680/1451808	3.40274e-06	1.5056e-05	10	control_i
GO:0045940	positive regulation of steroid metabolic process	3/21	41680/1451808	0.0213761	0.0401424	3	control_i
GO:0071805	potassium ion transmembrane transport	20/406	41680/1451808	0.0148809	0.0304211	20	control_i
GO:0003002	regionalization	53/741	41680/1451808	2.57228e-09	1.8654e-08	53	control_i
GO:0010872	regulation of cholesterol esterification	3/10	41680/1451808	0.00243969	0.00596985	3	control_i
GO:0010817	regulation of hormone levels	43/1128	41680/1451808	0.0400367	0.0695261	43	control_i
GO:1904478	regulation of intestinal absorption	3/10	41680/1451808	0.00243969	0.00596985	3	control_i
GO:2000021	regulation of ion homeostasis	15/300	41680/1451808	0.0282221	0.051745	15	control_i
GO:1905952	regulation of lipid localization	13/153	41680/1451808	0.000511683	0.00158917	13	control_i
GO:0051004	regulation of lipoprotein lipase activity	4/28	41680/1451808	0.00801565	0.0172604	4	control_i
GO:0045661	regulation of myoblast differentiation	4/45	41680/1451808	0.0398322	0.0695261	4	control_i
GO:0001505	regulation of neurotransmitter levels	16/325	41680/1451808	0.0272284	0.0502559	16	control_i
GO:0061318	renal filtration cell differentiation	6/15	41680/1451808	2.23975e-06	1.13038e-05	6	control_i
GO:0061437	renal system vasculature development	3/21	41680/1451808	0.0213761	0.0401424	3	control_i
GO:0061326	renal tubule development	40/276	41680/1451808	0	0	40	control_i
GO:0061333	renal tubule morphogenesis	22/190	41680/1451808	3.85939e-08	2.4325e-07	22	control_i
GO:0048608	reproductive structure development	49/946	41680/1451808	7.87077e-05	0.000292214	49	control_i
GO:0061458	reproductive system development	49/946	41680/1451808	7.87077e-05	0.000292214	49	control_i
GO:0060541	respiratory system development	25/231	41680/1451808	1.86863e-08	1.23177e-07	25	control_i
GO:0042493	response to drug	55/861	41680/1451808	6.05805e-08	3.62361e-07	55	control_i
GO:0010038	response to metal ion	59/595	41680/1451808	4.44089e-16	5.9767e-15	59	control_i
GO:0010043	response to zinc ion	6/45	41680/1451808	0.0017435	0.00433192	6	control_i
GO:0050953	sensory perception of light stimulus	20/276	41680/1451808	0.000171741	0.00059013	20	control_i
GO:0055078	sodium ion homeostasis	12/78	41680/1451808	2.33414e-06	1.15989e-05	12	control_i
GO:0035376	sterol import	2/10	41680/1451808	0.0318188	0.0558558	2	control_i
GO:0006641	triglyceride metabolic process	20/153	41680/1451808	2.03864e-08	1.31696e-07	20	control_i
GO:0035148	tube formation	18/171	41680/1451808	2.56318e-06	1.18273e-05	18	control_i
GO:0035239	tube morphogenesis	69/780	41680/1451808	5.55112e-16	7.17204e-15	69	control_i
GO:0001657	ureteric bud development	27/210	41680/1451808	1.11136e-10	9.70185e-10	27	control_i
GO:0060675	ureteric bud morphogenesis	10/105	41680/1451808	0.000916333	0.00264264	10	control_i
GO:0007601	visual perception	18/253	41680/1451808	0.000439106	0.0013905	18	control_i
GO:0071773	cellular response to BMP stimulus	13/253	58287/1918840.5	0.0471198	0.0697685	13	control_ii
GO:0042417	dopamine metabolic process	4/36	58287/1918840.5	0.0231331	0.0352255	4	control_ii
GO:0048871	multicellular organismal homeostasis	70/990	58287/1918840.5	1.58661e-10	3.63428e-10	70	control_ii
GO:0007218	neuropeptide signaling pathway	11/171	58287/1918840.5	0.015986	0.0249084	11	control_ii
GO:0055075	potassium ion homeostasis	3/15	58287/1918840.5	0.00969497	0.0154658	3	control_ii
GO:0071772	response to BMP	13/253	58287/1918840.5	0.0471198	0.0697685	13	control_ii
GO:0001894	tissue homeostasis	27/406	58287/1918840.5	0.000155412	0.000291261	27	control_ii
GO:0030509	BMP signaling pathway	18/253	76079/1801202	0.0227166	0.0443571	18	control_iii
GO:0009713	catechol-containing compound biosynthetic process	4/28	76079/1801202	0.028985	0.0554301	4	control_iii
GO:0042423	catecholamine biosynthetic process	4/28	76079/1801202	0.028985	0.0554301	4	control_iii
GO:0098742	cell-cell adhesion via plasma-membrane adhesion molecules	34/496	76079/1801202	0.00443448	0.00945513	34	control_iii
GO:0042730	fibrinolysis	5/28	76079/1801202	0.00585347	0.0124093	5	control_iii
GO:0014014	negative regulation of gliogenesis	6/45	76079/1801202	0.0112408	0.0230405	6	control_iii
GO:0051055	negative regulation of lipid biosynthetic process	6/55	76079/1801202	0.0280833	0.0542651	6	control_iii
GO:0030100	regulation of endocytosis	33/406	76079/1801202	0.000313066	0.000712561	33	control_iii
GO:0014013	regulation of gliogenesis	13/153	76079/1801202	0.0133689	0.0269559	13	control_iii
GO:0048736	appendage development	24/351	88999/2105352	0.0153236	0.0274099	24	control_iv
GO:0003231	cardiac ventricle development	15/210	88999/2105352	0.0343342	0.0583988	15	control_iv
GO:0006775	fat-soluble vitamin metabolic process	8/55	88999/2105352	0.00209878	0.0039586	8	control_iv
GO:0097154	GABAergic neuron differentiation	3/15	88999/2105352	0.0234625	0.0408184	3	control_iv
GO:0060173	limb development	24/351	88999/2105352	0.0153236	0.0274099	24	control_iv
GO:0032892	positive regulation of organic acid transport	9/36	88999/2105352	1.43189e-05	3.1718e-05	9	control_iv
GO:0002577	regulation of antigen processing and presentation	6/28	88999/2105352	0.000961228	0.00185903	6	control_iv
GO:0002664	regulation of T cell tolerance induction	3/15	88999/2105352	0.0234625	0.0408184	3	control_iv
GO:0002643	regulation of tolerance induction	4/28	88999/2105352	0.0290615	0.0501015	4	control_iv
GO:0043252	sodium-independent organic anion transport	18/36	88999/2105352	8.88178e-16	2.729e-15	18	control_iv
GO:0002517	T cell tolerance induction	4/21	88999/2105352	0.0107255	0.019459	4	control_iv

## Sheet: KIRP_Stage
ID	Description	GPRatio	BgRatio	pvalue	p.adjust	GOcount	Stages
	disappear gradually in stage i
GO:0006639	acylglycerol metabolic process	31/190	46546/945312.5	5.03007e-09	6.14967e-08	31	control_i
GO:0098656	anion transmembrane transport	149/1128	46546/945312.5	0	0	149	control_i
GO:0007411	axon guidance	24/325	46546/945312.5	0.032992	0.0969301	24	control_i
GO:0018410	C-terminal protein amino acid modification	10/105	46546/945312.5	0.0344853	0.0992459	10	control_i
GO:0046394	carboxylic acid biosynthetic process	81/703	46546/945312.5	2.504e-12	4.3137e-11	81	control_i
GO:1905039	carboxylic acid transmembrane transport	19/153	46546/945312.5	0.000204995	0.0014126	19	control_i
GO:0046942	carboxylic acid transport	153/946	46546/945312.5	0	0	153	control_i
GO:0008652	cellular amino acid biosynthetic process	24/91	46546/945312.5	9.66038e-12	1.59186e-10	24	control_i
GO:0044242	cellular lipid catabolic process	67/300	46546/945312.5	0	0	67	control_i
GO:0016101	diterpenoid metabolic process	22/210	46546/945312.5	0.000759222	0.00418546	22	control_i
GO:0050886	endocrine process	12/120	46546/945312.5	0.0155229	0.0507171	12	control_i
GO:1901569	fatty acid derivative catabolic process	3/10	46546/945312.5	0.0110305	0.0409859	3	control_i
GO:1901568	fatty acid derivative metabolic process	28/190	46546/945312.5	2.44422e-07	2.80715e-06	28	control_i
GO:1901571	fatty acid derivative transport	9/55	46546/945312.5	0.00137798	0.00681868	9	control_i
GO:0006631	fatty acid metabolic process	116/630	46546/945312.5	0	0	116	control_i
GO:0021879	forebrain neuron differentiation	6/45	46546/945312.5	0.0223209	0.0703222	6	control_i
GO:0072310	glomerular epithelial cell development	3/10	46546/945312.5	0.0110305	0.0409859	3	control_i
GO:0072015	glomerular visceral epithelial cell development	3/10	46546/945312.5	0.0110305	0.0409859	3	control_i
GO:0009064	glutamine family amino acid metabolic process	11/66	46546/945312.5	0.000358273	0.00222599	11	control_i
GO:0046503	glycerolipid catabolic process	10/91	46546/945312.5	0.0141511	0.0483282	10	control_i
GO:0042445	hormone metabolic process	31/325	46546/945312.5	0.000393717	0.00240675	31	control_i
GO:0032309	icosanoid secretion	9/55	46546/945312.5	0.00137798	0.00681868	9	control_i
GO:0071715	icosanoid transport	9/55	46546/945312.5	0.00137798	0.00681868	9	control_i
GO:0006720	isoprenoid metabolic process	23/253	46546/945312.5	0.00374239	0.0172971	23	control_i
GO:0016042	lipid catabolic process	107/666	46546/945312.5	0	0	107	control_i
GO:0055088	lipid homeostasis	18/153	46546/945312.5	0.000573932	0.00324657	18	control_i
GO:0015718	monocarboxylic acid transport	37/190	46546/945312.5	7.98028e-13	1.59186e-11	37	control_i
GO:0055083	monovalent inorganic anion homeostasis	4/15	46546/945312.5	0.00517668	0.0217996	4	control_i
GO:0035637	multicellular organismal signaling	30/378	46546/945312.5	0.00760629	0.0303451	30	control_i
GO:0051346	negative regulation of hydrolase activity	62/946	46546/945312.5	0.0152249	0.0501761	62	control_i
GO:0032369	negative regulation of lipid transport	5/28	46546/945312.5	0.0110037	0.0409859	5	control_i
GO:0097485	neuron projection guidance	24/325	46546/945312.5	0.032992	0.0969301	24	control_i
GO:0015804	neutral amino acid transport	6/36	46546/945312.5	0.00775779	0.030468	6	control_i
GO:0006638	neutral lipid metabolic process	31/190	46546/945312.5	5.03007e-09	6.14967e-08	31	control_i
GO:0016053	organic acid biosynthetic process	81/703	46546/945312.5	2.504e-12	4.3137e-11	81	control_i
GO:1903825	organic acid transmembrane transport	19/153	46546/945312.5	0.000204995	0.0014126	19	control_i
GO:0015849	organic acid transport	153/946	46546/945312.5	0	0	153	control_i
GO:0015711	organic anion transport	263/1711	46546/945312.5	0	0	263	control_i
GO:1901616	organic hydroxy compound catabolic process	11/55	46546/945312.5	6.56812e-05	0.000541156	11	control_i
GO:0001503	ossification	44/630	46546/945312.5	0.0139386	0.0483282	44	control_i
GO:0018958	phenol-containing compound metabolic process	10/91	46546/945312.5	0.0141511	0.0483282	10	control_i
GO:0034767	positive regulation of ion transmembrane transport	14/171	46546/945312.5	0.0439821	0.123476	14	control_i
GO:0043270	positive regulation of ion transport	43/496	46546/945312.5	0.000290512	0.00186617	43	control_i
GO:0034764	positive regulation of transmembrane transport	14/171	46546/945312.5	0.0439821	0.123476	14	control_i
GO:0072529	pyrimidine-containing compound catabolic process	6/28	46546/945312.5	0.00209932	0.00994555	6	control_i
GO:0008217	regulation of blood pressure	25/300	46546/945312.5	0.00779789	0.030468	25	control_i
GO:0097746	regulation of blood vessel diameter	18/190	46546/945312.5	0.00630037	0.0254025	18	control_i
GO:0050880	regulation of blood vessel size	24/210	46546/945312.5	0.000122383	0.000927667	24	control_i
GO:0034765	regulation of ion transmembrane transport	111/1653	46546/945312.5	0.0007761	0.00420203	111	control_i
GO:0060191	regulation of lipase activity	15/120	46546/945312.5	0.000851578	0.00454574	15	control_i
GO:0032368	regulation of lipid transport	11/120	46546/945312.5	0.0350125	0.0997724	11	control_i
GO:0051004	regulation of lipoprotein lipase activity	4/28	46546/945312.5	0.0468257	0.12954	4	control_i
GO:0006937	regulation of muscle contraction	28/325	46546/945312.5	0.0032472	0.0151937	28	control_i
GO:0090257	regulation of muscle system process	34/496	46546/945312.5	0.0345659	0.0992459	34	control_i
GO:0003073	regulation of systemic arterial blood pressure	12/105	46546/945312.5	0.00561537	0.0231329	12	control_i
GO:0001990	regulation of systemic arterial blood pressure by hormone	6/45	46546/945312.5	0.0223209	0.0703222	6	control_i
GO:0003044	regulation of systemic arterial blood pressure mediated by a chemical signal	6/45	46546/945312.5	0.0223209	0.0703222	6	control_i
GO:0034762	regulation of transmembrane transport	112/1711	46546/945312.5	0.00171545	0.00822981	112	control_i
GO:0035296	regulation of tube diameter	18/190	46546/945312.5	0.00630037	0.0254025	18	control_i
GO:0003091	renal water homeostasis	5/36	46546/945312.5	0.030564	0.0912458	5	control_i
GO:0032496	response to lipopolysaccharide	47/528	46546/945312.5	8.53445e-05	0.000660113	47	control_i
GO:0002237	response to molecule of bacterial origin	54/561	46546/945312.5	2.98264e-06	3.05519e-05	54	control_i
GO:0001523	retinoid metabolic process	20/190	46546/945312.5	0.00121037	0.006284	20	control_i
GO:0007530	sex determination	5/28	46546/945312.5	0.0110037	0.0409859	5	control_i
GO:0008202	steroid metabolic process	50/630	46546/945312.5	0.000761997	0.00418546	50	control_i
GO:0006721	terpenoid metabolic process	23/231	46546/945312.5	0.00116899	0.00615344	23	control_i
GO:0006641	triglyceride metabolic process	31/190	46546/945312.5	5.03007e-09	6.14967e-08	31	control_i
GO:0006833	water transport	5/15	46546/945312.5	0.000572933	0.00324657	5	control_i
	disappear gradually in stage ii
GO:0006022	aminoglycan metabolic process	26/300	61584/1101128	0.0188466	0.0842919	26	control_ii
GO:0071276	cellular response to cadmium ion	7/28	61584/1101128	0.000713066	0.00392186	7	control_ii
GO:0071241	cellular response to inorganic substance	29/325	61584/1101128	0.00953253	0.0461874	29	control_ii
GO:0071248	cellular response to metal ion	29/325	61584/1101128	0.00953253	0.0461874	29	control_ii
GO:0017144	drug metabolic process	6/45	61584/1101128	0.0383392	0.147208	6	control_ii
GO:0019373	epoxygenase P450 pathway	4/21	61584/1101128	0.0272444	0.115505	4	control_ii
GO:0007565	female pregnancy	24/276	61584/1101128	0.0224636	0.0972626	24	control_ii
GO:0002524	hypersensitivity	3/10	61584/1101128	0.0155945	0.071314	3	control_ii
GO:0006690	icosanoid metabolic process	15/136	61584/1101128	0.00936413	0.0461874	15	control_ii
GO:0045742	positive regulation of epidermal growth factor receptor signaling pathway	6/45	61584/1101128	0.0383392	0.147208	6	control_ii
GO:1901186	positive regulation of ERBB signaling pathway	6/45	61584/1101128	0.0383392	0.147208	6	control_ii
GO:0032103	positive regulation of response to external stimulus	68/528	61584/1101128	2.17054e-10	1.8796e-09	68	control_ii
GO:0002864	regulation of acute inflammatory response to antigenic stimulus	3/15	61584/1101128	0.0480117	0.179273	3	control_ii
GO:0044070	regulation of anion transport	19/136	61584/1101128	0.000217954	0.00123204	19	control_ii
GO:1903725	regulation of phospholipid metabolic process	10/91	61584/1101128	0.0309012	0.125768	10	control_ii
GO:0009991	response to extracellular stimulus	129/1225	61584/1101128	9.35307e-12	9.51675e-11	129	control_ii
GO:0031667	response to nutrient levels	114/990	61584/1101128	5.44675e-13	6.52009e-12	114	control_ii
	disappear gradually in stage iii
GO:0042044	fluid transport	13/28	49611/1272012.5	1.03972e-11	5.95478e-11	13	control_iii
GO:0010951	negative regulation of endopeptidase activity	45/741	49611/1272012.5	0.0027397	0.00932979	45	control_iii
GO:0010466	negative regulation of peptidase activity	45/820	49611/1272012.5	0.0152781	0.0427787	45	control_iii
GO:0019755	one-carbon compound transport	5/15	49611/1272012.5	0.000195012	0.000767859	5	control_iii
GO:0051917	regulation of fibrinolysis	4/15	49611/1272012.5	0.00223388	0.00771148	4	control_iii
GO:1905952	regulation of lipid localization	16/231	49611/1272012.5	0.0199404	0.0546192	16	control_iii
GO:0003014	renal system process	12/171	49611/1272012.5	0.0366463	0.0961964	12	control_iii
GO:0042493	response to drug	62/1176	49611/1272012.5	0.0117548	0.0340485	62	control_iii
GO:0055078	sodium ion homeostasis	9/120	49611/1272012.5	0.0457242	0.116389	9	control_iii
	disappear gradually in stage iv
GO:0046464	acylglycerol catabolic process	6/36	58044/957728	0.0200695	0.0374405	6	control_iv
GO:0003333	amino acid transmembrane transport	13/105	58044/957728	0.0110827	0.0219674	13	control_iv
GO:0006865	amino acid transport	23/190	58044/957728	0.00127892	0.00281109	23	control_iv
GO:0006835	dicarboxylic acid transport	16/136	58044/957728	0.00846602	0.0172427	16	control_iv
GO:0046461	neutral lipid catabolic process	6/36	58044/957728	0.0200695	0.0374405	6	control_iv
GO:0010038	response to metal ion	69/741	58044/957728	0.00032652	0.000755078	69	control_iv
GO:0019433	triglyceride catabolic process	6/36	58044/957728	0.0200695	0.0374405	6	control_iv
GO:0033559	unsaturated fatty acid metabolic process	23/120	58044/957728	8.3482e-07	2.85123e-06	23	control_iv
GO:0051180	vitamin transport	6/36	58044/957728	0.0200695	0.0374405	6	control_iv
	disappear gradually in total
GO:0006639	acylglycerol metabolic process	31/190	46546/945312.5	5.03007e-09	6.14967e-08	31	control_i
GO:0098656	anion transmembrane transport	149/1128	46546/945312.5	0	0	149	control_i
GO:0007411	axon guidance	24/325	46546/945312.5	0.032992	0.0969301	24	control_i
GO:0018410	C-terminal protein amino acid modification	10/105	46546/945312.5	0.0344853	0.0992459	10	control_i
GO:0046394	carboxylic acid biosynthetic process	81/703	46546/945312.5	2.504e-12	4.3137e-11	81	control_i
GO:1905039	carboxylic acid transmembrane transport	19/153	46546/945312.5	0.000204995	0.0014126	19	control_i
GO:0046942	carboxylic acid transport	153/946	46546/945312.5	0	0	153	control_i
GO:0008652	cellular amino acid biosynthetic process	24/91	46546/945312.5	9.66038e-12	1.59186e-10	24	control_i
GO:0044242	cellular lipid catabolic process	67/300	46546/945312.5	0	0	67	control_i
GO:0016101	diterpenoid metabolic process	22/210	46546/945312.5	0.000759222	0.00418546	22	control_i
GO:0050886	endocrine process	12/120	46546/945312.5	0.0155229	0.0507171	12	control_i
GO:1901569	fatty acid derivative catabolic process	3/10	46546/945312.5	0.0110305	0.0409859	3	control_i
GO:1901568	fatty acid derivative metabolic process	28/190	46546/945312.5	2.44422e-07	2.80715e-06	28	control_i
GO:1901571	fatty acid derivative transport	9/55	46546/945312.5	0.00137798	0.00681868	9	control_i
GO:0006631	fatty acid metabolic process	116/630	46546/945312.5	0	0	116	control_i
GO:0021879	forebrain neuron differentiation	6/45	46546/945312.5	0.0223209	0.0703222	6	control_i
GO:0072310	glomerular epithelial cell development	3/10	46546/945312.5	0.0110305	0.0409859	3	control_i
GO:0072015	glomerular visceral epithelial cell development	3/10	46546/945312.5	0.0110305	0.0409859	3	control_i
GO:0009064	glutamine family amino acid metabolic process	11/66	46546/945312.5	0.000358273	0.00222599	11	control_i
GO:0046503	glycerolipid catabolic process	10/91	46546/945312.5	0.0141511	0.0483282	10	control_i
GO:0042445	hormone metabolic process	31/325	46546/945312.5	0.000393717	0.00240675	31	control_i
GO:0032309	icosanoid secretion	9/55	46546/945312.5	0.00137798	0.00681868	9	control_i
GO:0071715	icosanoid transport	9/55	46546/945312.5	0.00137798	0.00681868	9	control_i
GO:0006720	isoprenoid metabolic process	23/253	46546/945312.5	0.00374239	0.0172971	23	control_i
GO:0016042	lipid catabolic process	107/666	46546/945312.5	0	0	107	control_i
GO:0055088	lipid homeostasis	18/153	46546/945312.5	0.000573932	0.00324657	18	control_i
GO:0015718	monocarboxylic acid transport	37/190	46546/945312.5	7.98028e-13	1.59186e-11	37	control_i
GO:0055083	monovalent inorganic anion homeostasis	4/15	46546/945312.5	0.00517668	0.0217996	4	control_i
GO:0035637	multicellular organismal signaling	30/378	46546/945312.5	0.00760629	0.0303451	30	control_i
GO:0051346	negative regulation of hydrolase activity	62/946	46546/945312.5	0.0152249	0.0501761	62	control_i
GO:0032369	negative regulation of lipid transport	5/28	46546/945312.5	0.0110037	0.0409859	5	control_i
GO:0097485	neuron projection guidance	24/325	46546/945312.5	0.032992	0.0969301	24	control_i
GO:0015804	neutral amino acid transport	6/36	46546/945312.5	0.00775779	0.030468	6	control_i
GO:0006638	neutral lipid metabolic process	31/190	46546/945312.5	5.03007e-09	6.14967e-08	31	control_i
GO:0016053	organic acid biosynthetic process	81/703	46546/945312.5	2.504e-12	4.3137e-11	81	control_i
GO:1903825	organic acid transmembrane transport	19/153	46546/945312.5	0.000204995	0.0014126	19	control_i
GO:0015849	organic acid transport	153/946	46546/945312.5	0	0	153	control_i
GO:0015711	organic anion transport	263/1711	46546/945312.5	0	0	263	control_i
GO:1901616	organic hydroxy compound catabolic process	11/55	46546/945312.5	6.56812e-05	0.000541156	11	control_i
GO:0001503	ossification	44/630	46546/945312.5	0.0139386	0.0483282	44	control_i
GO:0018958	phenol-containing compound metabolic process	10/91	46546/945312.5	0.0141511	0.0483282	10	control_i
GO:0034767	positive regulation of ion transmembrane transport	14/171	46546/945312.5	0.0439821	0.123476	14	control_i
GO:0043270	positive regulation of ion transport	43/496	46546/945312.5	0.000290512	0.00186617	43	control_i
GO:0034764	positive regulation of transmembrane transport	14/171	46546/945312.5	0.0439821	0.123476	14	control_i
GO:0072529	pyrimidine-containing compound catabolic process	6/28	46546/945312.5	0.00209932	0.00994555	6	control_i
GO:0008217	regulation of blood pressure	25/300	46546/945312.5	0.00779789	0.030468	25	control_i
GO:0097746	regulation of blood vessel diameter	18/190	46546/945312.5	0.00630037	0.0254025	18	control_i
GO:0050880	regulation of blood vessel size	24/210	46546/945312.5	0.000122383	0.000927667	24	control_i
GO:0034765	regulation of ion transmembrane transport	111/1653	46546/945312.5	0.0007761	0.00420203	111	control_i
GO:0060191	regulation of lipase activity	15/120	46546/945312.5	0.000851578	0.00454574	15	control_i
GO:0032368	regulation of lipid transport	11/120	46546/945312.5	0.0350125	0.0997724	11	control_i
GO:0051004	regulation of lipoprotein lipase activity	4/28	46546/945312.5	0.0468257	0.12954	4	control_i
GO:0006937	regulation of muscle contraction	28/325	46546/945312.5	0.0032472	0.0151937	28	control_i
GO:0090257	regulation of muscle system process	34/496	46546/945312.5	0.0345659	0.0992459	34	control_i
GO:0003073	regulation of systemic arterial blood pressure	12/105	46546/945312.5	0.00561537	0.0231329	12	control_i
GO:0001990	regulation of systemic arterial blood pressure by hormone	6/45	46546/945312.5	0.0223209	0.0703222	6	control_i
GO:0003044	regulation of systemic arterial blood pressure mediated by a chemical signal	6/45	46546/945312.5	0.0223209	0.0703222	6	control_i
GO:0034762	regulation of transmembrane transport	112/1711	46546/945312.5	0.00171545	0.00822981	112	control_i
GO:0035296	regulation of tube diameter	18/190	46546/945312.5	0.00630037	0.0254025	18	control_i
GO:0003091	renal water homeostasis	5/36	46546/945312.5	0.030564	0.0912458	5	control_i
GO:0032496	response to lipopolysaccharide	47/528	46546/945312.5	8.53445e-05	0.000660113	47	control_i
GO:0002237	response to molecule of bacterial origin	54/561	46546/945312.5	2.98264e-06	3.05519e-05	54	control_i
GO:0001523	retinoid metabolic process	20/190	46546/945312.5	0.00121037	0.006284	20	control_i
GO:0007530	sex determination	5/28	46546/945312.5	0.0110037	0.0409859	5	control_i
GO:0008202	steroid metabolic process	50/630	46546/945312.5	0.000761997	0.00418546	50	control_i
GO:0006721	terpenoid metabolic process	23/231	46546/945312.5	0.00116899	0.00615344	23	control_i
GO:0006641	triglyceride metabolic process	31/190	46546/945312.5	5.03007e-09	6.14967e-08	31	control_i
GO:0006833	water transport	5/15	46546/945312.5	0.000572933	0.00324657	5	control_i
GO:0006022	aminoglycan metabolic process	26/300	61584/1101128	0.0188466	0.0842919	26	control_ii
GO:0071276	cellular response to cadmium ion	7/28	61584/1101128	0.000713066	0.00392186	7	control_ii
GO:0071241	cellular response to inorganic substance	29/325	61584/1101128	0.00953253	0.0461874	29	control_ii
GO:0071248	cellular response to metal ion	29/325	61584/1101128	0.00953253	0.0461874	29	control_ii
GO:0017144	drug metabolic process	6/45	61584/1101128	0.0383392	0.147208	6	control_ii
GO:0019373	epoxygenase P450 pathway	4/21	61584/1101128	0.0272444	0.115505	4	control_ii
GO:0007565	female pregnancy	24/276	61584/1101128	0.0224636	0.0972626	24	control_ii
GO:0002524	hypersensitivity	3/10	61584/1101128	0.0155945	0.071314	3	control_ii
GO:0006690	icosanoid metabolic process	15/136	61584/1101128	0.00936413	0.0461874	15	control_ii
GO:0045742	positive regulation of epidermal growth factor receptor signaling pathway	6/45	61584/1101128	0.0383392	0.147208	6	control_ii
GO:1901186	positive regulation of ERBB signaling pathway	6/45	61584/1101128	0.0383392	0.147208	6	control_ii
GO:0032103	positive regulation of response to external stimulus	68/528	61584/1101128	2.17054e-10	1.8796e-09	68	control_ii
GO:0002864	regulation of acute inflammatory response to antigenic stimulus	3/15	61584/1101128	0.0480117	0.179273	3	control_ii
GO:0044070	regulation of anion transport	19/136	61584/1101128	0.000217954	0.00123204	19	control_ii
GO:1903725	regulation of phospholipid metabolic process	10/91	61584/1101128	0.0309012	0.125768	10	control_ii
GO:0009991	response to extracellular stimulus	129/1225	61584/1101128	9.35307e-12	9.51675e-11	129	control_ii
GO:0031667	response to nutrient levels	114/990	61584/1101128	5.44675e-13	6.52009e-12	114	control_ii
GO:0042044	fluid transport	13/28	49611/1272012.5	1.03972e-11	5.95478e-11	13	control_iii
GO:0010951	negative regulation of endopeptidase activity	45/741	49611/1272012.5	0.0027397	0.00932979	45	control_iii
GO:0010466	negative regulation of peptidase activity	45/820	49611/1272012.5	0.0152781	0.0427787	45	control_iii
GO:0019755	one-carbon compound transport	5/15	49611/1272012.5	0.000195012	0.000767859	5	control_iii
GO:0051917	regulation of fibrinolysis	4/15	49611/1272012.5	0.00223388	0.00771148	4	control_iii
GO:1905952	regulation of lipid localization	16/231	49611/1272012.5	0.0199404	0.0546192	16	control_iii
GO:0003014	renal system process	12/171	49611/1272012.5	0.0366463	0.0961964	12	control_iii
GO:0042493	response to drug	62/1176	49611/1272012.5	0.0117548	0.0340485	62	control_iii
GO:0055078	sodium ion homeostasis	9/120	49611/1272012.5	0.0457242	0.116389	9	control_iii
GO:0046464	acylglycerol catabolic process	6/36	58044/957728	0.0200695	0.0374405	6	control_iv
GO:0003333	amino acid transmembrane transport	13/105	58044/957728	0.0110827	0.0219674	13	control_iv
GO:0006865	amino acid transport	23/190	58044/957728	0.00127892	0.00281109	23	control_iv
GO:0006835	dicarboxylic acid transport	16/136	58044/957728	0.00846602	0.0172427	16	control_iv
GO:0046461	neutral lipid catabolic process	6/36	58044/957728	0.0200695	0.0374405	6	control_iv
GO:0010038	response to metal ion	69/741	58044/957728	0.00032652	0.000755078	69	control_iv
GO:0019433	triglyceride catabolic process	6/36	58044/957728	0.0200695	0.0374405	6	control_iv
GO:0033559	unsaturated fatty acid metabolic process	23/120	58044/957728	8.3482e-07	2.85123e-06	23	control_iv
GO:0051180	vitamin transport	6/36	58044/957728	0.0200695	0.0374405	6	control_iv

## Sheet: LUAD_Stage
ID	Description	GPRatio	BgRatio	pvalue	p.adjust	GOcount	Stages
	disappear gradually in stage i
GO:0060249	anatomical structure homeostasis	5/741	4811/2274844.5	0.0217583	0.100507	5	control_i
GO:0052695	cellular glucuronidation	5/36	4811/2274844.5	1.5071e-08	2.22588e-07	5	control_i
GO:0071466	cellular response to xenobiotic stimulus	5/136	4811/2274844.5	1.20731e-05	8.08993e-05	5	control_i
GO:0007586	digestion	6/861	4811/2274844.5	0.0108254	0.0532943	6	control_i
GO:0043583	ear development	9/561	4811/2274844.5	4.2055e-06	4.24976e-05	9	control_i
GO:0042471	ear morphogenesis	9/325	4811/2274844.5	4.60031e-08	5.96563e-07	9	control_i
GO:0048568	embryonic organ development	14/1485	4811/2274844.5	5.40737e-06	4.94388e-05	14	control_i
GO:0009812	flavonoid metabolic process	3/21	4811/2274844.5	1.22192e-05	8.08993e-05	3	control_i
GO:0019585	glucuronate metabolic process	5/36	4811/2274844.5	1.5071e-08	2.22588e-07	5	control_i
GO:0009914	hormone transport	7/595	4811/2274844.5	0.00032425	0.00188655	7	control_i
GO:0048839	inner ear development	8/435	4811/2274844.5	5.33893e-06	4.94388e-05	8	control_i
GO:0030277	maintenance of gastrointestinal epithelium	1/21	4811/2274844.5	0.0434856	0.177643	1	control_i
GO:0050804	modulation of chemical synaptic transmission	9/595	4811/2274844.5	6.7245e-06	5.6135e-05	9	control_i
GO:0050768	negative regulation of neurogenesis	5/378	4811/2274844.5	0.00137908	0.00756524	5	control_i
GO:0010817	regulation of hormone levels	18/1953	4811/2274844.5	3.66376e-07	4.18105e-06	18	control_i
GO:0043523	regulation of neuron apoptotic process	3/276	4811/2274844.5	0.0213855	0.100507	3	control_i
GO:0009410	response to xenobiotic stimulus	5/136	4811/2274844.5	1.20731e-05	8.08993e-05	5	control_i
GO:0042573	retinoic acid metabolic process	1/21	4811/2274844.5	0.0434856	0.177643	1	control_i
GO:0090596	sensory organ morphogenesis	9/820	4811/2274844.5	8.04443e-05	0.000498236	9	control_i
GO:0006063	uronic acid metabolic process	5/36	4811/2274844.5	1.5071e-08	2.22588e-07	5	control_i
GO:0006805	xenobiotic metabolic process	5/136	4811/2274844.5	1.20731e-05	8.08993e-05	5	control_i
	disappear gradually in stage ii
GO:0006956	complement activation	5/231	4327/1062882	0.0027423	0.00941921	5	control_ii
GO:0010721	negative regulation of cell development	6/465	4327/1062882	0.0127916	0.0404216	6	control_ii
GO:0015711	organic anion transport	8/903	4327/1062882	0.0337678	0.0988021	8	control_ii
	disappear gradually in stage iii
	disappear gradually in stage iv
GO:0097756	negative regulation of blood vessel diameter	3/91	5089/785004.5	0.0216822	0.0540889	3	control_iv
GO:0045840	positive regulation of mitotic nuclear division	12/45	5089/785004.5	1.11022e-16	4.44089e-16	12	control_iv
GO:0051101	regulation of DNA binding	4/136	5089/785004.5	0.0122387	0.0322656	4	control_iv
GO:0048167	regulation of synaptic plasticity	6/190	5089/785004.5	0.00162225	0.00482516	6	control_iv
GO:0050954	sensory perception of mechanical stimulus	4/190	5089/785004.5	0.0360447	0.0862099	4	control_iv
GO:0007605	sensory perception of sound	4/171	5089/785004.5	0.0259023	0.0625973	4	control_iv
GO:0003018	vascular process in circulatory system	7/253	5089/785004.5	0.00145851	0.00445229	7	control_iv
	disappear gradually in total
GO:0060249	anatomical structure homeostasis	5/741	4811/2274844.5	0.0217583	0.100507	5	control_i
GO:0052695	cellular glucuronidation	5/36	4811/2274844.5	1.5071e-08	2.22588e-07	5	control_i
GO:0071466	cellular response to xenobiotic stimulus	5/136	4811/2274844.5	1.20731e-05	8.08993e-05	5	control_i
GO:0007586	digestion	6/861	4811/2274844.5	0.0108254	0.0532943	6	control_i
GO:0043583	ear development	9/561	4811/2274844.5	4.2055e-06	4.24976e-05	9	control_i
GO:0042471	ear morphogenesis	9/325	4811/2274844.5	4.60031e-08	5.96563e-07	9	control_i
GO:0048568	embryonic organ development	14/1485	4811/2274844.5	5.40737e-06	4.94388e-05	14	control_i
GO:0009812	flavonoid metabolic process	3/21	4811/2274844.5	1.22192e-05	8.08993e-05	3	control_i
GO:0019585	glucuronate metabolic process	5/36	4811/2274844.5	1.5071e-08	2.22588e-07	5	control_i
GO:0009914	hormone transport	7/595	4811/2274844.5	0.00032425	0.00188655	7	control_i
GO:0048839	inner ear development	8/435	4811/2274844.5	5.33893e-06	4.94388e-05	8	control_i
GO:0030277	maintenance of gastrointestinal epithelium	1/21	4811/2274844.5	0.0434856	0.177643	1	control_i
GO:0050804	modulation of chemical synaptic transmission	9/595	4811/2274844.5	6.7245e-06	5.6135e-05	9	control_i
GO:0050768	negative regulation of neurogenesis	5/378	4811/2274844.5	0.00137908	0.00756524	5	control_i
GO:0010817	regulation of hormone levels	18/1953	4811/2274844.5	3.66376e-07	4.18105e-06	18	control_i
GO:0043523	regulation of neuron apoptotic process	3/276	4811/2274844.5	0.0213855	0.100507	3	control_i
GO:0009410	response to xenobiotic stimulus	5/136	4811/2274844.5	1.20731e-05	8.08993e-05	5	control_i
GO:0042573	retinoic acid metabolic process	1/21	4811/2274844.5	0.0434856	0.177643	1	control_i
GO:0090596	sensory organ morphogenesis	9/820	4811/2274844.5	8.04443e-05	0.000498236	9	control_i
GO:0006063	uronic acid metabolic process	5/36	4811/2274844.5	1.5071e-08	2.22588e-07	5	control_i
GO:0006805	xenobiotic metabolic process	5/136	4811/2274844.5	1.20731e-05	8.08993e-05	5	control_i
GO:0006956	complement activation	5/231	4327/1062882	0.0027423	0.00941921	5	control_ii
GO:0010721	negative regulation of cell development	6/465	4327/1062882	0.0127916	0.0404216	6	control_ii
GO:0015711	organic anion transport	8/903	4327/1062882	0.0337678	0.0988021	8	control_ii
GO:0097756	negative regulation of blood vessel diameter	3/91	5089/785004.5	0.0216822	0.0540889	3	control_iv
GO:0045840	positive regulation of mitotic nuclear division	12/45	5089/785004.5	1.11022e-16	4.44089e-16	12	control_iv
GO:0051101	regulation of DNA binding	4/136	5089/785004.5	0.0122387	0.0322656	4	control_iv
GO:0048167	regulation of synaptic plasticity	6/190	5089/785004.5	0.00162225	0.00482516	6	control_iv
GO:0050954	sensory perception of mechanical stimulus	4/190	5089/785004.5	0.0360447	0.0862099	4	control_iv
GO:0007605	sensory perception of sound	4/171	5089/785004.5	0.0259023	0.0625973	4	control_iv
GO:0003018	vascular process in circulatory system	7/253	5089/785004.5	0.00145851	0.00445229	7	control_iv

## Sheet: STAD_Stage
ID	Description	GPRatio	BgRatio	pvalue	p.adjust	GOcount	Stages
	disappear gradually in stage i
GO:0006639	acylglycerol metabolic process	36/120	61355/901824.5	1.64313e-14	4.72026e-14	36	control_i
GO:0034219	carbohydrate transmembrane transport	6/28	61355/901824.5	0.0101607	0.0214052	6	control_i
GO:0008643	carbohydrate transport	25/171	61355/901824.5	0.000253587	0.000598011	25	control_i
GO:0030301	cholesterol transport	16/91	61355/901824.5	0.000404549	0.000900265	16	control_i
GO:0007586	digestion	172/630	61355/901824.5	0	0	172	control_i
GO:0022600	digestive system process	16/91	61355/901824.5	0.000404549	0.000900265	16	control_i
GO:0071542	dopaminergic neuron differentiation	7/45	61355/901824.5	0.0312722	0.0617626	7	control_i
GO:0017144	drug metabolic process	6/28	61355/901824.5	0.0101607	0.0214052	6	control_i
GO:0050892	intestinal absorption	15/45	61355/901824.5	1.48953e-07	4.05767e-07	15	control_i
GO:0006720	isoprenoid metabolic process	23/136	61355/901824.5	4.72377e-05	0.000118469	23	control_i
GO:0006869	lipid transport	55/561	61355/901824.5	0.00455858	0.00986651	55	control_i
GO:0006638	neutral lipid metabolic process	36/120	61355/901824.5	1.64313e-14	4.72026e-14	36	control_i
GO:0015711	organic anion transport	106/780	61355/901824.5	1.42089e-11	4.00893e-11	106	control_i
GO:0015850	organic hydroxy compound transport	62/561	61355/901824.5	0.000137162	0.000328357	62	control_i
GO:0032374	regulation of cholesterol transport	7/45	61355/901824.5	0.0312722	0.0617626	7	control_i
GO:1905952	regulation of lipid localization	17/153	61355/901824.5	0.0318174	0.0620637	17	control_i
GO:0032371	regulation of sterol transport	7/45	61355/901824.5	0.0312722	0.0617626	7	control_i
GO:0015918	sterol transport	16/91	61355/901824.5	0.000404549	0.000900265	16	control_i
GO:0006721	terpenoid metabolic process	23/136	61355/901824.5	4.72377e-05	0.000118469	23	control_i
GO:0006641	triglyceride metabolic process	36/120	61355/901824.5	1.64313e-14	4.72026e-14	36	control_i
GO:0034379	very-low-density lipoprotein particle assembly	3/10	61355/901824.5	0.026298	0.0539622	3	control_i
	disappear gradually in stage ii
GO:0061844	antimicrobial humoral immune response mediated by antimicrobial peptide	11/91	64310/945312.5	0.0448393	0.0707758	11	control_ii
GO:0061436	establishment of skin barrier	15/21	64310/945312.5	1.1291e-13	3.13422e-13	15	control_ii
GO:0030299	intestinal cholesterol absorption	6/21	64310/945312.5	0.00220343	0.00389838	6	control_ii
GO:0098856	intestinal lipid absorption	6/21	64310/945312.5	0.00220343	0.00389838	6	control_ii
GO:0016042	lipid catabolic process	67/406	64310/945312.5	2.04259e-11	5.39109e-11	67	control_ii
GO:0010876	lipid localization	73/630	64310/945312.5	7.84145e-06	1.63958e-05	73	control_ii
GO:0042157	lipoprotein metabolic process	40/253	64310/945312.5	6.16896e-07	1.32427e-06	40	control_ii
GO:0034367	macromolecular complex remodeling	6/28	64310/945312.5	0.010158	0.016799	6	control_ii
GO:0048871	multicellular organismal homeostasis	75/630	64310/945312.5	2.25348e-06	4.77383e-06	75	control_ii
GO:0033555	multicellular organismal response to stress	9/66	64310/945312.5	0.0342291	0.0545633	9	control_ii
GO:0050891	multicellular organismal water homeostasis	24/91	64310/945312.5	6.35706e-09	1.52759e-08	24	control_ii
GO:0034369	plasma lipoprotein particle remodeling	6/28	64310/945312.5	0.010158	0.016799	6	control_ii
GO:0034368	protein-lipid complex remodeling	6/28	64310/945312.5	0.010158	0.016799	6	control_ii
GO:1904478	regulation of intestinal absorption	6/15	64310/945312.5	0.00028973	0.000538524	6	control_ii
GO:0032368	regulation of lipid transport	17/105	64310/945312.5	0.000727674	0.00133131	17	control_ii
GO:0033561	regulation of water loss via skin	15/21	64310/945312.5	1.1291e-13	3.13422e-13	15	control_ii
GO:0042493	response to drug	89/820	64310/945312.5	1.19713e-05	2.37948e-05	89	control_ii
GO:0009620	response to fungus	16/55	64310/945312.5	4.79899e-07	1.0441e-06	16	control_ii
GO:0034372	very-low-density lipoprotein particle remodeling	3/10	64310/945312.5	0.0262941	0.0423335	3	control_ii
GO:0030104	water homeostasis	24/91	64310/945312.5	6.35706e-09	1.52759e-08	24	control_ii
	disappear gradually in stage iii
GO:0018410	C-terminal protein amino acid modification	16/105	66740/899140.5	0.00464906	0.00761654	16	control_iii
GO:0006501	C-terminal protein lipidation	16/105	66740/899140.5	0.00464906	0.00761654	16	control_iii
GO:1902476	chloride transmembrane transport	13/105	66740/899140.5	0.0474796	0.0716849	13	control_iii
GO:0006821	chloride transport	17/120	66740/899140.5	0.00756915	0.01227	17	control_iii
GO:0007588	excretion	10/66	66740/899140.5	0.0232225	0.0361238	10	control_iii
GO:0006775	fat-soluble vitamin metabolic process	10/45	66740/899140.5	0.00144525	0.00264962	10	control_iii
GO:1904659	glucose transmembrane transport	10/28	66740/899140.5	1.90696e-05	4.13621e-05	10	control_iii
GO:0035428	hexose transmembrane transport	10/28	66740/899140.5	1.90696e-05	4.13621e-05	10	control_iii
GO:0042158	lipoprotein biosynthetic process	33/171	66740/899140.5	3.86746e-07	9.16291e-07	33	control_iii
GO:1905950	monosaccharide transmembrane transport	10/28	66740/899140.5	1.90696e-05	4.13621e-05	10	control_iii
GO:1900004	negative regulation of serine-type endopeptidase activity	6/15	66740/899140.5	0.000464826	0.000883744	6	control_iii
GO:1902572	negative regulation of serine-type peptidase activity	6/15	66740/899140.5	0.000464826	0.000883744	6	control_iii
GO:0008217	regulation of blood pressure	32/210	66740/899140.5	8.76205e-05	0.000182345	32	control_iii
GO:0010817	regulation of hormone levels	119/1326	66740/899140.5	0.0197744	0.031074	119	control_iii
GO:1900003	regulation of serine-type endopeptidase activity	6/21	66740/899140.5	0.00342134	0.00572702	6	control_iii
GO:1902571	regulation of serine-type peptidase activity	6/21	66740/899140.5	0.00342134	0.00572702	6	control_iii
GO:0009991	response to extracellular stimulus	73/780	66740/899140.5	0.025931	0.0399337	73	control_iii
GO:0007584	response to nutrient	26/190	66740/899140.5	0.00190824	0.00337781	26	control_iii
GO:0031667	response to nutrient levels	73/741	66740/899140.5	0.0089836	0.0144112	73	control_iii
	disappear gradually in stage iv
GO:0033275	actin-myosin filament sliding	21/78	102148/1041124.5	1.40463e-05	3.21937e-05	21	control_iv
GO:0001508	action potential	78/153	102148/1041124.5	0	0	78	control_iv
GO:0007188	adenylate cyclase-modulating G-protein coupled receptor signaling pathway	41/190	102148/1041124.5	1.16158e-06	2.98965e-06	41	control_iv
GO:0030534	adult behavior	35/171	102148/1041124.5	2.23829e-05	4.88071e-05	35	control_iv
GO:0015696	ammonium transport	20/120	102148/1041124.5	0.0130213	0.0212953	20	control_iv
GO:0048483	autonomic nervous system development	10/36	102148/1041124.5	0.00190549	0.00343864	10	control_iv
GO:0055074	calcium ion homeostasis	203/990	102148/1041124.5	0	0	203	control_iv
GO:0097553	calcium ion transmembrane import into cytosol	37/171	102148/1041124.5	3.49923e-06	8.38746e-06	37	control_iv
GO:0006816	calcium ion transport	175/741	102148/1041124.5	0	0	175	control_iv
GO:0060402	calcium ion transport into cytosol	46/231	102148/1041124.5	2.85713e-06	7.17712e-06	46	control_iv
GO:0046058	cAMP metabolic process	33/210	102148/1041124.5	0.00470748	0.00812169	33	control_iv
GO:0019933	cAMP-mediated signaling	30/136	102148/1041124.5	1.88011e-05	4.12836e-05	30	control_iv
GO:0098742	cell-cell adhesion via plasma-membrane adhesion molecules	63/435	102148/1041124.5	0.00122133	0.00232423	63	control_iv
GO:0006874	cellular calcium ion homeostasis	202/946	102148/1041124.5	0	0	202	control_iv
GO:0072503	cellular divalent inorganic cation homeostasis	205/1035	102148/1041124.5	0	0	205	control_iv
GO:0071773	cellular response to BMP stimulus	50/231	102148/1041124.5	7.66929e-08	2.16951e-07	50	control_iv
GO:0050890	cognition	103/465	102148/1041124.5	3.55271e-15	1.31241e-14	103	control_iv
GO:0009190	cyclic nucleotide biosynthetic process	40/231	102148/1041124.5	0.000297032	0.000586591	40	control_iv
GO:0009187	cyclic nucleotide metabolic process	43/300	102148/1041124.5	0.00778018	0.0132771	43	control_iv
GO:0052652	cyclic purine nucleotide metabolic process	40/231	102148/1041124.5	0.000297032	0.000586591	40	control_iv
GO:0019935	cyclic-nucleotide-mediated signaling	30/136	102148/1041124.5	1.88011e-05	4.12836e-05	30	control_iv
GO:0060401	cytosolic calcium ion transport	46/231	102148/1041124.5	2.85713e-06	7.17712e-06	46	control_iv
GO:0072507	divalent inorganic cation homeostasis	229/1128	102148/1041124.5	0	0	229	control_iv
GO:0007187	G-protein coupled receptor signaling pathway, coupled to cyclic nucleotide second messenger	43/231	102148/1041124.5	3.28823e-05	7.12072e-05	43	control_iv
GO:0015758	glucose transport	27/171	102148/1041124.5	0.00921431	0.0155553	27	control_iv
GO:0008645	hexose transport	34/190	102148/1041124.5	0.000437637	0.000858863	34	control_iv
GO:0046879	hormone secretion	95/561	102148/1041124.5	1.25766e-07	3.52595e-07	95	control_iv
GO:0009914	hormone transport	95/595	102148/1041124.5	1.81983e-06	4.64574e-06	95	control_iv
GO:0051703	intraspecies interaction between organisms	10/45	102148/1041124.5	0.0105929	0.0175988	10	control_iv
GO:0007612	learning	79/253	102148/1041124.5	0	0	79	control_iv
GO:0007611	learning or memory	83/378	102148/1041124.5	2.45803e-12	8.29917e-12	83	control_iv
GO:0050804	modulation of chemical synaptic transmission	151/561	102148/1041124.5	0	0	151	control_iv
GO:0015749	monosaccharide transport	42/210	102148/1041124.5	6.69412e-06	1.58042e-05	42	control_iv
GO:0055067	monovalent inorganic cation homeostasis	39/171	102148/1041124.5	4.79814e-07	1.32159e-06	39	control_iv
GO:0051705	multi-organism behavior	21/78	102148/1041124.5	1.40463e-05	3.21937e-05	21	control_iv
GO:0030049	muscle filament sliding	21/78	102148/1041124.5	1.40463e-05	3.21937e-05	21	control_iv
GO:0014902	myotube differentiation	24/120	102148/1041124.5	0.000572251	0.00110237	24	control_iv
GO:0032845	negative regulation of homeostatic process	61/253	102148/1041124.5	3.2788e-11	1.05055e-10	61	control_iv
GO:0051283	negative regulation of sequestering of calcium ion	37/171	102148/1041124.5	3.49923e-06	8.38746e-06	37	control_iv
GO:0007218	neuropeptide signaling pathway	41/136	102148/1041124.5	3.50355e-11	1.11123e-10	41	control_iv
GO:0006836	neurotransmitter transport	71/253	102148/1041124.5	2.22045e-16	8.60766e-16	71	control_iv
GO:0007200	phospholipase C-activating G-protein coupled receptor signaling pathway	21/136	102148/1041124.5	0.0247857	0.0393066	21	control_iv
GO:0045762	positive regulation of adenylate cyclase activity	12/45	102148/1041124.5	0.00103337	0.00197852	12	control_iv
GO:0030816	positive regulation of cAMP metabolic process	20/105	102148/1041124.5	0.00288258	0.005085	20	control_iv
GO:1904064	positive regulation of cation transmembrane transport	87/300	102148/1041124.5	0	0	87	control_iv
GO:0031281	positive regulation of cyclase activity	17/78	102148/1041124.5	0.00129419	0.0024189	17	control_iv
GO:0030804	positive regulation of cyclic nucleotide biosynthetic process	25/120	102148/1041124.5	0.000231796	0.000463591	25	control_iv
GO:0030801	positive regulation of cyclic nucleotide metabolic process	28/171	102148/1041124.5	0.00494049	0.00847713	28	control_iv
GO:0034767	positive regulation of ion transmembrane transport	87/300	102148/1041124.5	0	0	87	control_iv
GO:0043270	positive regulation of ion transport	173/780	102148/1041124.5	0	0	173	control_iv
GO:0051349	positive regulation of lyase activity	17/78	102148/1041124.5	0.00129419	0.0024189	17	control_iv
GO:0030810	positive regulation of nucleotide biosynthetic process	25/120	102148/1041124.5	0.000231796	0.000463591	25	control_iv
GO:0045981	positive regulation of nucleotide metabolic process	28/190	102148/1041124.5	0.0195472	0.0313154	28	control_iv
GO:0043268	positive regulation of potassium ion transport	21/45	102148/1041124.5	2.40045e-10	7.38961e-10	21	control_iv
GO:1900373	positive regulation of purine nucleotide biosynthetic process	25/120	102148/1041124.5	0.000231796	0.000463591	25	control_iv
GO:1900544	positive regulation of purine nucleotide metabolic process	28/190	102148/1041124.5	0.0195472	0.0313154	28	control_iv
GO:0034764	positive regulation of transmembrane transport	87/300	102148/1041124.5	0	0	87	control_iv
GO:0045761	regulation of adenylate cyclase activity	17/78	102148/1041124.5	0.00129419	0.0024189	17	control_iv
GO:1903169	regulation of calcium ion transmembrane transport	47/190	102148/1041124.5	2.24315e-09	6.7726e-09	47	control_iv
GO:0030814	regulation of cAMP metabolic process	33/210	102148/1041124.5	0.00470748	0.00812169	33	control_iv
GO:0031279	regulation of cyclase activity	23/120	102148/1041124.5	0.00134668	0.00245847	23	control_iv
GO:0030802	regulation of cyclic nucleotide biosynthetic process	40/210	102148/1041124.5	3.5398e-05	7.40999e-05	40	control_iv
GO:0030799	regulation of cyclic nucleotide metabolic process	43/276	102148/1041124.5	0.00168775	0.00306332	43	control_iv
GO:0002027	regulation of heart rate	59/136	102148/1041124.5	0	0	59	control_iv
GO:0046883	regulation of hormone secretion	76/496	102148/1041124.5	7.25111e-05	0.000149793	76	control_iv
GO:0051339	regulation of lyase activity	23/120	102148/1041124.5	0.00134668	0.00245847	23	control_iv
GO:0001505	regulation of neurotransmitter levels	71/231	102148/1041124.5	0	0	71	control_iv
GO:0051588	regulation of neurotransmitter transport	22/66	102148/1041124.5	1.60027e-07	4.44677e-07	22	control_iv
GO:0030808	regulation of nucleotide biosynthetic process	40/210	102148/1041124.5	3.5398e-05	7.40999e-05	40	control_iv
GO:1901379	regulation of potassium ion transmembrane transport	35/78	102148/1041124.5	1.33227e-15	5.10161e-15	35	control_iv
GO:0043266	regulation of potassium ion transport	54/136	102148/1041124.5	0	0	54	control_iv
GO:1900371	regulation of purine nucleotide biosynthetic process	40/210	102148/1041124.5	3.5398e-05	7.40999e-05	40	control_iv
GO:0051279	regulation of release of sequestered calcium ion into cytosol	29/120	102148/1041124.5	3.94362e-06	9.38103e-06	29	control_iv
GO:0051282	regulation of sequestering of calcium ion	37/171	102148/1041124.5	3.49923e-06	8.38746e-06	37	control_iv
GO:0051209	release of sequestered calcium ion into cytosol	37/171	102148/1041124.5	3.49923e-06	8.38746e-06	37	control_iv
GO:0003014	renal system process	20/120	102148/1041124.5	0.0130213	0.0212953	20	control_iv
GO:0071772	response to BMP	50/231	102148/1041124.5	7.66929e-08	2.16951e-07	50	control_iv
GO:0019932	second-messenger-mediated signaling	146/595	102148/1041124.5	0	0	146	control_iv
GO:0051208	sequestering of calcium ion	37/171	102148/1041124.5	3.49923e-06	8.38746e-06	37	control_iv
GO:0023061	signal release	185/903	102148/1041124.5	0	0	185	control_iv
GO:0060538	skeletal muscle organ development	62/300	102148/1041124.5	1.49241e-08	4.37961e-08	62	control_iv
GO:0007519	skeletal muscle tissue development	61/253	102148/1041124.5	3.2788e-11	1.05055e-10	61	control_iv
GO:0035176	social behavior	10/45	102148/1041124.5	0.0105929	0.0175988	10	control_iv
GO:0055078	sodium ion homeostasis	10/55	102148/1041124.5	0.0397755	0.0609244	10	control_iv
GO:0048485	sympathetic nervous system development	7/21	102148/1041124.5	0.00293556	0.00512092	7	control_iv
	disappear gradually in total
GO:0006639	acylglycerol metabolic process	36/120	61355/901824.5	1.64313e-14	4.72026e-14	36	control_i
GO:0034219	carbohydrate transmembrane transport	6/28	61355/901824.5	0.0101607	0.0214052	6	control_i
GO:0008643	carbohydrate transport	25/171	61355/901824.5	0.000253587	0.000598011	25	control_i
GO:0030301	cholesterol transport	16/91	61355/901824.5	0.000404549	0.000900265	16	control_i
GO:0007586	digestion	172/630	61355/901824.5	0	0	172	control_i
GO:0022600	digestive system process	16/91	61355/901824.5	0.000404549	0.000900265	16	control_i
GO:0071542	dopaminergic neuron differentiation	7/45	61355/901824.5	0.0312722	0.0617626	7	control_i
GO:0017144	drug metabolic process	6/28	61355/901824.5	0.0101607	0.0214052	6	control_i
GO:0050892	intestinal absorption	15/45	61355/901824.5	1.48953e-07	4.05767e-07	15	control_i
GO:0006720	isoprenoid metabolic process	23/136	61355/901824.5	4.72377e-05	0.000118469	23	control_i
GO:0006869	lipid transport	55/561	61355/901824.5	0.00455858	0.00986651	55	control_i
GO:0006638	neutral lipid metabolic process	36/120	61355/901824.5	1.64313e-14	4.72026e-14	36	control_i
GO:0015711	organic anion transport	106/780	61355/901824.5	1.42089e-11	4.00893e-11	106	control_i
GO:0015850	organic hydroxy compound transport	62/561	61355/901824.5	0.000137162	0.000328357	62	control_i
GO:0032374	regulation of cholesterol transport	7/45	61355/901824.5	0.0312722	0.0617626	7	control_i
GO:1905952	regulation of lipid localization	17/153	61355/901824.5	0.0318174	0.0620637	17	control_i
GO:0032371	regulation of sterol transport	7/45	61355/901824.5	0.0312722	0.0617626	7	control_i
GO:0015918	sterol transport	16/91	61355/901824.5	0.000404549	0.000900265	16	control_i
GO:0006721	terpenoid metabolic process	23/136	61355/901824.5	4.72377e-05	0.000118469	23	control_i
GO:0006641	triglyceride metabolic process	36/120	61355/901824.5	1.64313e-14	4.72026e-14	36	control_i
GO:0034379	very-low-density lipoprotein particle assembly	3/10	61355/901824.5	0.026298	0.0539622	3	control_i
GO:0061844	antimicrobial humoral immune response mediated by antimicrobial peptide	11/91	64310/945312.5	0.0448393	0.0707758	11	control_ii
GO:0061436	establishment of skin barrier	15/21	64310/945312.5	1.1291e-13	3.13422e-13	15	control_ii
GO:0030299	intestinal cholesterol absorption	6/21	64310/945312.5	0.00220343	0.00389838	6	control_ii
GO:0098856	intestinal lipid absorption	6/21	64310/945312.5	0.00220343	0.00389838	6	control_ii
GO:0016042	lipid catabolic process	67/406	64310/945312.5	2.04259e-11	5.39109e-11	67	control_ii
GO:0010876	lipid localization	73/630	64310/945312.5	7.84145e-06	1.63958e-05	73	control_ii
GO:0042157	lipoprotein metabolic process	40/253	64310/945312.5	6.16896e-07	1.32427e-06	40	control_ii
GO:0034367	macromolecular complex remodeling	6/28	64310/945312.5	0.010158	0.016799	6	control_ii
GO:0048871	multicellular organismal homeostasis	75/630	64310/945312.5	2.25348e-06	4.77383e-06	75	control_ii
GO:0033555	multicellular organismal response to stress	9/66	64310/945312.5	0.0342291	0.0545633	9	control_ii
GO:0050891	multicellular organismal water homeostasis	24/91	64310/945312.5	6.35706e-09	1.52759e-08	24	control_ii
GO:0034369	plasma lipoprotein particle remodeling	6/28	64310/945312.5	0.010158	0.016799	6	control_ii
GO:0034368	protein-lipid complex remodeling	6/28	64310/945312.5	0.010158	0.016799	6	control_ii
GO:1904478	regulation of intestinal absorption	6/15	64310/945312.5	0.00028973	0.000538524	6	control_ii
GO:0032368	regulation of lipid transport	17/105	64310/945312.5	0.000727674	0.00133131	17	control_ii
GO:0033561	regulation of water loss via skin	15/21	64310/945312.5	1.1291e-13	3.13422e-13	15	control_ii
GO:0042493	response to drug	89/820	64310/945312.5	1.19713e-05	2.37948e-05	89	control_ii
GO:0009620	response to fungus	16/55	64310/945312.5	4.79899e-07	1.0441e-06	16	control_ii
GO:0034372	very-low-density lipoprotein particle remodeling	3/10	64310/945312.5	0.0262941	0.0423335	3	control_ii
GO:0030104	water homeostasis	24/91	64310/945312.5	6.35706e-09	1.52759e-08	24	control_ii
GO:0018410	C-terminal protein amino acid modification	16/105	66740/899140.5	0.00464906	0.00761654	16	control_iii
GO:0006501	C-terminal protein lipidation	16/105	66740/899140.5	0.00464906	0.00761654	16	control_iii
GO:1902476	chloride transmembrane transport	13/105	66740/899140.5	0.0474796	0.0716849	13	control_iii
GO:0006821	chloride transport	17/120	66740/899140.5	0.00756915	0.01227	17	control_iii
GO:0007588	excretion	10/66	66740/899140.5	0.0232225	0.0361238	10	control_iii
GO:0006775	fat-soluble vitamin metabolic process	10/45	66740/899140.5	0.00144525	0.00264962	10	control_iii
GO:1904659	glucose transmembrane transport	10/28	66740/899140.5	1.90696e-05	4.13621e-05	10	control_iii
GO:0035428	hexose transmembrane transport	10/28	66740/899140.5	1.90696e-05	4.13621e-05	10	control_iii
GO:0042158	lipoprotein biosynthetic process	33/171	66740/899140.5	3.86746e-07	9.16291e-07	33	control_iii
GO:1905950	monosaccharide transmembrane transport	10/28	66740/899140.5	1.90696e-05	4.13621e-05	10	control_iii
GO:1900004	negative regulation of serine-type endopeptidase activity	6/15	66740/899140.5	0.000464826	0.000883744	6	control_iii
GO:1902572	negative regulation of serine-type peptidase activity	6/15	66740/899140.5	0.000464826	0.000883744	6	control_iii
GO:0008217	regulation of blood pressure	32/210	66740/899140.5	8.76205e-05	0.000182345	32	control_iii
GO:0010817	regulation of hormone levels	119/1326	66740/899140.5	0.0197744	0.031074	119	control_iii
GO:1900003	regulation of serine-type endopeptidase activity	6/21	66740/899140.5	0.00342134	0.00572702	6	control_iii
GO:1902571	regulation of serine-type peptidase activity	6/21	66740/899140.5	0.00342134	0.00572702	6	control_iii
GO:0009991	response to extracellular stimulus	73/780	66740/899140.5	0.025931	0.0399337	73	control_iii
GO:0007584	response to nutrient	26/190	66740/899140.5	0.00190824	0.00337781	26	control_iii
GO:0031667	response to nutrient levels	73/741	66740/899140.5	0.0089836	0.0144112	73	control_iii
GO:0033275	actin-myosin filament sliding	21/78	102148/1041124.5	1.40463e-05	3.21937e-05	21	control_iv
GO:0001508	action potential	78/153	102148/1041124.5	0	0	78	control_iv
GO:0007188	adenylate cyclase-modulating G-protein coupled receptor signaling pathway	41/190	102148/1041124.5	1.16158e-06	2.98965e-06	41	control_iv
GO:0030534	adult behavior	35/171	102148/1041124.5	2.23829e-05	4.88071e-05	35	control_iv
GO:0015696	ammonium transport	20/120	102148/1041124.5	0.0130213	0.0212953	20	control_iv
GO:0048483	autonomic nervous system development	10/36	102148/1041124.5	0.00190549	0.00343864	10	control_iv
GO:0055074	calcium ion homeostasis	203/990	102148/1041124.5	0	0	203	control_iv
GO:0097553	calcium ion transmembrane import into cytosol	37/171	102148/1041124.5	3.49923e-06	8.38746e-06	37	control_iv
GO:0006816	calcium ion transport	175/741	102148/1041124.5	0	0	175	control_iv
GO:0060402	calcium ion transport into cytosol	46/231	102148/1041124.5	2.85713e-06	7.17712e-06	46	control_iv
GO:0046058	cAMP metabolic process	33/210	102148/1041124.5	0.00470748	0.00812169	33	control_iv
GO:0019933	cAMP-mediated signaling	30/136	102148/1041124.5	1.88011e-05	4.12836e-05	30	control_iv
GO:0098742	cell-cell adhesion via plasma-membrane adhesion molecules	63/435	102148/1041124.5	0.00122133	0.00232423	63	control_iv
GO:0006874	cellular calcium ion homeostasis	202/946	102148/1041124.5	0	0	202	control_iv
GO:0072503	cellular divalent inorganic cation homeostasis	205/1035	102148/1041124.5	0	0	205	control_iv
GO:0071773	cellular response to BMP stimulus	50/231	102148/1041124.5	7.66929e-08	2.16951e-07	50	control_iv
GO:0050890	cognition	103/465	102148/1041124.5	3.55271e-15	1.31241e-14	103	control_iv
GO:0009190	cyclic nucleotide biosynthetic process	40/231	102148/1041124.5	0.000297032	0.000586591	40	control_iv
GO:0009187	cyclic nucleotide metabolic process	43/300	102148/1041124.5	0.00778018	0.0132771	43	control_iv
GO:0052652	cyclic purine nucleotide metabolic process	40/231	102148/1041124.5	0.000297032	0.000586591	40	control_iv
GO:0019935	cyclic-nucleotide-mediated signaling	30/136	102148/1041124.5	1.88011e-05	4.12836e-05	30	control_iv
GO:0060401	cytosolic calcium ion transport	46/231	102148/1041124.5	2.85713e-06	7.17712e-06	46	control_iv
GO:0072507	divalent inorganic cation homeostasis	229/1128	102148/1041124.5	0	0	229	control_iv
GO:0007187	G-protein coupled receptor signaling pathway, coupled to cyclic nucleotide second messenger	43/231	102148/1041124.5	3.28823e-05	7.12072e-05	43	control_iv
GO:0015758	glucose transport	27/171	102148/1041124.5	0.00921431	0.0155553	27	control_iv
GO:0008645	hexose transport	34/190	102148/1041124.5	0.000437637	0.000858863	34	control_iv
GO:0046879	hormone secretion	95/561	102148/1041124.5	1.25766e-07	3.52595e-07	95	control_iv
GO:0009914	hormone transport	95/595	102148/1041124.5	1.81983e-06	4.64574e-06	95	control_iv
GO:0051703	intraspecies interaction between organisms	10/45	102148/1041124.5	0.0105929	0.0175988	10	control_iv
GO:0007612	learning	79/253	102148/1041124.5	0	0	79	control_iv
GO:0007611	learning or memory	83/378	102148/1041124.5	2.45803e-12	8.29917e-12	83	control_iv
GO:0050804	modulation of chemical synaptic transmission	151/561	102148/1041124.5	0	0	151	control_iv
GO:0015749	monosaccharide transport	42/210	102148/1041124.5	6.69412e-06	1.58042e-05	42	control_iv
GO:0055067	monovalent inorganic cation homeostasis	39/171	102148/1041124.5	4.79814e-07	1.32159e-06	39	control_iv
GO:0051705	multi-organism behavior	21/78	102148/1041124.5	1.40463e-05	3.21937e-05	21	control_iv
GO:0030049	muscle filament sliding	21/78	102148/1041124.5	1.40463e-05	3.21937e-05	21	control_iv
GO:0014902	myotube differentiation	24/120	102148/1041124.5	0.000572251	0.00110237	24	control_iv
GO:0032845	negative regulation of homeostatic process	61/253	102148/1041124.5	3.2788e-11	1.05055e-10	61	control_iv
GO:0051283	negative regulation of sequestering of calcium ion	37/171	102148/1041124.5	3.49923e-06	8.38746e-06	37	control_iv
GO:0007218	neuropeptide signaling pathway	41/136	102148/1041124.5	3.50355e-11	1.11123e-10	41	control_iv
GO:0006836	neurotransmitter transport	71/253	102148/1041124.5	2.22045e-16	8.60766e-16	71	control_iv
GO:0007200	phospholipase C-activating G-protein coupled receptor signaling pathway	21/136	102148/1041124.5	0.0247857	0.0393066	21	control_iv
GO:0045762	positive regulation of adenylate cyclase activity	12/45	102148/1041124.5	0.00103337	0.00197852	12	control_iv
GO:0030816	positive regulation of cAMP metabolic process	20/105	102148/1041124.5	0.00288258	0.005085	20	control_iv
GO:1904064	positive regulation of cation transmembrane transport	87/300	102148/1041124.5	0	0	87	control_iv
GO:0031281	positive regulation of cyclase activity	17/78	102148/1041124.5	0.00129419	0.0024189	17	control_iv
GO:0030804	positive regulation of cyclic nucleotide biosynthetic process	25/120	102148/1041124.5	0.000231796	0.000463591	25	control_iv
GO:0030801	positive regulation of cyclic nucleotide metabolic process	28/171	102148/1041124.5	0.00494049	0.00847713	28	control_iv
GO:0034767	positive regulation of ion transmembrane transport	87/300	102148/1041124.5	0	0	87	control_iv
GO:0043270	positive regulation of ion transport	173/780	102148/1041124.5	0	0	173	control_iv
GO:0051349	positive regulation of lyase activity	17/78	102148/1041124.5	0.00129419	0.0024189	17	control_iv
GO:0030810	positive regulation of nucleotide biosynthetic process	25/120	102148/1041124.5	0.000231796	0.000463591	25	control_iv
GO:0045981	positive regulation of nucleotide metabolic process	28/190	102148/1041124.5	0.0195472	0.0313154	28	control_iv
GO:0043268	positive regulation of potassium ion transport	21/45	102148/1041124.5	2.40045e-10	7.38961e-10	21	control_iv
GO:1900373	positive regulation of purine nucleotide biosynthetic process	25/120	102148/1041124.5	0.000231796	0.000463591	25	control_iv
GO:1900544	positive regulation of purine nucleotide metabolic process	28/190	102148/1041124.5	0.0195472	0.0313154	28	control_iv
GO:0034764	positive regulation of transmembrane transport	87/300	102148/1041124.5	0	0	87	control_iv
GO:0045761	regulation of adenylate cyclase activity	17/78	102148/1041124.5	0.00129419	0.0024189	17	control_iv
GO:1903169	regulation of calcium ion transmembrane transport	47/190	102148/1041124.5	2.24315e-09	6.7726e-09	47	control_iv
GO:0030814	regulation of cAMP metabolic process	33/210	102148/1041124.5	0.00470748	0.00812169	33	control_iv
GO:0031279	regulation of cyclase activity	23/120	102148/1041124.5	0.00134668	0.00245847	23	control_iv
GO:0030802	regulation of cyclic nucleotide biosynthetic process	40/210	102148/1041124.5	3.5398e-05	7.40999e-05	40	control_iv
GO:0030799	regulation of cyclic nucleotide metabolic process	43/276	102148/1041124.5	0.00168775	0.00306332	43	control_iv
GO:0002027	regulation of heart rate	59/136	102148/1041124.5	0	0	59	control_iv
GO:0046883	regulation of hormone secretion	76/496	102148/1041124.5	7.25111e-05	0.000149793	76	control_iv
GO:0051339	regulation of lyase activity	23/120	102148/1041124.5	0.00134668	0.00245847	23	control_iv
GO:0001505	regulation of neurotransmitter levels	71/231	102148/1041124.5	0	0	71	control_iv
GO:0051588	regulation of neurotransmitter transport	22/66	102148/1041124.5	1.60027e-07	4.44677e-07	22	control_iv
GO:0030808	regulation of nucleotide biosynthetic process	40/210	102148/1041124.5	3.5398e-05	7.40999e-05	40	control_iv
GO:1901379	regulation of potassium ion transmembrane transport	35/78	102148/1041124.5	1.33227e-15	5.10161e-15	35	control_iv
GO:0043266	regulation of potassium ion transport	54/136	102148/1041124.5	0	0	54	control_iv
GO:1900371	regulation of purine nucleotide biosynthetic process	40/210	102148/1041124.5	3.5398e-05	7.40999e-05	40	control_iv
GO:0051279	regulation of release of sequestered calcium ion into cytosol	29/120	102148/1041124.5	3.94362e-06	9.38103e-06	29	control_iv
GO:0051282	regulation of sequestering of calcium ion	37/171	102148/1041124.5	3.49923e-06	8.38746e-06	37	control_iv
GO:0051209	release of sequestered calcium ion into cytosol	37/171	102148/1041124.5	3.49923e-06	8.38746e-06	37	control_iv
GO:0003014	renal system process	20/120	102148/1041124.5	0.0130213	0.0212953	20	control_iv
GO:0071772	response to BMP	50/231	102148/1041124.5	7.66929e-08	2.16951e-07	50	control_iv
GO:0019932	second-messenger-mediated signaling	146/595	102148/1041124.5	0	0	146	control_iv
GO:0051208	sequestering of calcium ion	37/171	102148/1041124.5	3.49923e-06	8.38746e-06	37	control_iv
GO:0023061	signal release	185/903	102148/1041124.5	0	0	185	control_iv
GO:0060538	skeletal muscle organ development	62/300	102148/1041124.5	1.49241e-08	4.37961e-08	62	control_iv
GO:0007519	skeletal muscle tissue development	61/253	102148/1041124.5	3.2788e-11	1.05055e-10	61	control_iv
GO:0035176	social behavior	10/45	102148/1041124.5	0.0105929	0.0175988	10	control_iv
GO:0055078	sodium ion homeostasis	10/55	102148/1041124.5	0.0397755	0.0609244	10	control_iv
GO:0048485	sympathetic nervous system development	7/21	102148/1041124.5	0.00293556	0.00512092	7	control_iv

## Sheet: THCA_Stage
ID	Description	GPRatio	BgRatio	pvalue	p.adjust	GOcount	Stages
	disappear gradually in stage i
GO:0006023	aminoglycan biosynthetic process	4/136	4589/628320.5	0.0181227	0.205432	4	control_i
GO:0072378	blood coagulation, fibrin clot formation	2/28	4589/628320.5	0.0177748	0.205432	2	control_i
GO:0016358	dendrite development	5/210	4589/628320.5	0.0197412	0.205432	5	control_i
GO:0060996	dendritic spine development	3/91	4589/628320.5	0.0294123	0.262281	3	control_i
GO:0035115	embryonic forelimb morphogenesis	2/36	4589/628320.5	0.028511	0.262281	2	control_i
GO:0035136	forelimb morphogenesis	2/45	4589/628320.5	0.0429229	0.324848	2	control_i
GO:0006024	glycosaminoglycan biosynthetic process	4/120	4589/628320.5	0.011955	0.173088	4	control_i
GO:0001822	kidney development	7/435	4589/628320.5	0.0425654	0.324848	7	control_i
GO:1903510	mucopolysaccharide metabolic process	3/105	4589/628320.5	0.0421467	0.324848	3	control_i
GO:0042476	odontogenesis	5/171	4589/628320.5	0.00879079	0.139397	5	control_i
GO:0042475	odontogenesis of dentin-containing tooth	4/91	4589/628320.5	0.00458895	0.0804274	4	control_i
GO:2000147	positive regulation of cell motility	11/703	4589/628320.5	0.0158791	0.203374	11	control_i
GO:0051272	positive regulation of cellular component movement	11/703	4589/628320.5	0.0158791	0.203374	11	control_i
GO:0040017	positive regulation of locomotion	11/780	4589/628320.5	0.0307176	0.262281	11	control_i
GO:0048168	regulation of neuronal synaptic plasticity	2/45	4589/628320.5	0.0429229	0.324848	2	control_i
GO:0048705	skeletal system morphogenesis	5/210	4589/628320.5	0.0197412	0.205432	5	control_i
	disappear gradually in stage ii
GO:0070252	actin-mediated cell contraction	17/105	34695/661250	3.35725e-05	0.000100433	17	control_ii
GO:0033275	actin-myosin filament sliding	17/66	34695/661250	3.639e-08	1.18941e-07	17	control_ii
GO:0097028	dendritic cell differentiation	6/36	34695/661250	0.0104421	0.027508	6	control_ii
GO:0072676	lymphocyte migration	19/120	34695/661250	1.65219e-05	4.98481e-05	19	control_ii
GO:0006936	muscle contraction	60/741	34695/661250	0.000716552	0.00199168	60	control_ii
GO:0030049	muscle filament sliding	17/66	34695/661250	3.639e-08	1.18941e-07	17	control_ii
GO:0003012	muscle system process	74/903	34695/661250	0.00013407	0.000387925	74	control_ii
GO:0050866	negative regulation of cell activation	26/171	34695/661250	1.13328e-06	3.57185e-06	26	control_ii
GO:0050921	positive regulation of chemotaxis	15/136	34695/661250	0.00534568	0.0142956	15	control_ii
GO:0045834	positive regulation of lipid metabolic process	13/105	34695/661250	0.0034452	0.00928363	13	control_ii
GO:0051260	protein homooligomerization	33/435	34695/661250	0.0231415	0.0600658	33	control_ii
GO:0050920	regulation of chemotaxis	35/276	34695/661250	1.5466e-06	4.83141e-06	35	control_ii
GO:0002923	regulation of humoral immune response mediated by circulating immunoglobulin	3/10	34695/661250	0.0131173	0.0342994	3	control_ii
GO:2000021	regulation of ion homeostasis	23/253	34695/661250	0.00784091	0.0208108	23	control_ii
GO:0002688	regulation of leukocyte chemotaxis	25/136	34695/661250	4.35712e-08	1.41107e-07	25	control_ii
GO:0002685	regulation of leukocyte migration	25/231	34695/661250	0.000537776	0.00151868	25	control_ii
GO:0002791	regulation of peptide secretion	64/780	34695/661250	0.000347861	0.000998333	64	control_ii
GO:0050708	regulation of protein secretion	56/666	34695/661250	0.000434679	0.00123743	56	control_ii
GO:0032496	response to lipopolysaccharide	64/630	34695/661250	5.18458e-07	1.64879e-06	64	control_ii
GO:0002237	response to molecule of bacterial origin	64/630	34695/661250	5.18458e-07	1.64879e-06	64	control_ii
	disappear gradually in stage iii
GO:0071356	cellular response to tumor necrosis factor	24/406	8616/710432	3.78175e-10	1.55524e-08	24	control_iii
GO:0044364	disruption of cells of other organism	6/55	8616/710432	5.53576e-05	0.00086727	6	control_iii
GO:0030900	forebrain development	20/741	8616/710432	0.000951225	0.00977978	20	control_iii
GO:0007187	G-protein coupled receptor signaling pathway, coupled to cyclic nucleotide second messenger	7/210	8616/710432	0.0148995	0.108932	7	control_iii
GO:0030902	hindbrain development	5/153	8616/710432	0.0395337	0.245407	5	control_iii
GO:0015698	inorganic anion transport	7/210	8616/710432	0.0148995	0.108932	7	control_iii
GO:0031640	killing of cells of other organism	6/55	8616/710432	5.53576e-05	0.00086727	6	control_iii
GO:0007612	learning	7/231	8616/710432	0.023661	0.162176	7	control_iii
GO:0022037	metencephalon development	5/105	8616/710432	0.00931387	0.0747381	5	control_iii
GO:0030335	positive regulation of cell migration	20/780	8616/710432	0.00173313	0.0162914	20	control_iii
GO:0032844	regulation of homeostatic process	16/820	8616/710432	0.045716	0.26387	16	control_iii
GO:0042391	regulation of membrane potential	28/946	8616/710432	2.22964e-05	0.00045847	28	control_iii
GO:0034612	response to tumor necrosis factor	24/406	8616/710432	3.78175e-10	1.55524e-08	24	control_iii
GO:0060538	skeletal muscle organ development	12/171	8616/710432	1.49377e-06	4.46772e-05	12	control_iii
	disappear gradually in stage iv
GO:0046717	acid secretion	5/153	12122/1076044.5	0.0302845	0.0900565	5	control_iv
GO:0016338	calcium-independent cell-cell adhesion via plasma membrane cell-adhesion molecules	2/21	12122/1076044.5	0.0231213	0.0719093	2	control_iv
GO:0003205	cardiac chamber development	9/300	12122/1076044.5	0.00761493	0.0278902	9	control_iv
GO:0003206	cardiac chamber morphogenesis	7/210	12122/1076044.5	0.0103161	0.0368121	7	control_iv
GO:0060048	cardiac muscle contraction	6/190	12122/1076044.5	0.0214603	0.0673616	6	control_iv
GO:0055008	cardiac muscle tissue morphogenesis	8/91	12122/1076044.5	9.58813e-06	5.60409e-05	8	control_iv
GO:0003231	cardiac ventricle development	9/210	12122/1076044.5	0.000708636	0.00324632	9	control_iv
GO:0003208	cardiac ventricle morphogenesis	6/105	12122/1076044.5	0.00127061	0.00552227	6	control_iv
GO:0071229	cellular response to acid chemical	12/325	12122/1076044.5	0.000387147	0.00182282	12	control_iv
GO:0046660	female sex differentiation	5/153	12122/1076044.5	0.0302845	0.0900565	5	control_iv
GO:0060047	heart contraction	13/561	12122/1076044.5	0.0125401	0.0433786	13	control_iv
GO:0003015	heart process	13/561	12122/1076044.5	0.0125401	0.0433786	13	control_iv
GO:0050804	modulation of chemical synaptic transmission	27/1225	12122/1076044.5	0.000989583	0.00441406	27	control_iv
GO:0098815	modulation of excitatory postsynaptic potential	3/66	12122/1076044.5	0.0387055	0.111196	3	control_iv
GO:0042692	muscle cell differentiation	36/1176	12122/1076044.5	1.43939e-07	9.38373e-07	36	control_iv
GO:0007517	muscle organ development	42/946	12122/1076044.5	1.83853e-13	1.83312e-12	42	control_iv
GO:0048644	muscle organ morphogenesis	8/120	12122/1076044.5	7.10895e-05	0.000395071	8	control_iv
GO:0060537	muscle tissue development	49/1225	12122/1076044.5	9.41469e-14	9.67146e-13	49	control_iv
GO:0060415	muscle tissue morphogenesis	8/120	12122/1076044.5	7.10895e-05	0.000395071	8	control_iv
GO:0030239	myofibril assembly	21/66	12122/1076044.5	0	0	21	control_iv
GO:0030072	peptide hormone secretion	10/465	12122/1076044.5	0.0403614	0.114979	10	control_iv
GO:2000463	positive regulation of excitatory postsynaptic potential	3/36	12122/1076044.5	0.00773357	0.0278902	3	control_iv
GO:0050769	positive regulation of neurogenesis	17/903	12122/1076044.5	0.0301383	0.0900565	17	control_iv
GO:0051047	positive regulation of secretion	26/861	12122/1076044.5	9.02618e-06	5.3682e-05	26	control_iv
GO:1903532	positive regulation of secretion by cell	26/741	12122/1076044.5	6.1949e-07	3.9624e-06	26	control_iv
GO:0006937	regulation of muscle contraction	7/276	12122/1076044.5	0.0383837	0.111196	7	control_iv
GO:0048167	regulation of synaptic plasticity	10/300	12122/1076044.5	0.00242445	0.0101468	10	control_iv
GO:0002026	regulation of the force of heart contraction	3/36	12122/1076044.5	0.00773357	0.0278902	3	control_iv
GO:0070542	response to fatty acid	12/91	12122/1076044.5	5.757e-10	4.33694e-09	12	control_iv
GO:0032526	response to retinoic acid	5/136	12122/1076044.5	0.0194291	0.0621363	5	control_iv
GO:0050954	sensory perception of mechanical stimulus	9/231	12122/1076044.5	0.00137855	0.00591554	9	control_iv
GO:0023061	signal release	32/1891	12122/1076044.5	0.01744	0.0577916	32	control_iv
GO:0007519	skeletal muscle tissue development	13/210	12122/1076044.5	1.01454e-06	6.25327e-06	13	control_iv
GO:0051146	striated muscle cell differentiation	27/528	12122/1076044.5	1.59508e-10	1.22893e-09	27	control_iv
GO:0006941	striated muscle contraction	15/276	12122/1076044.5	8.0629e-07	5.06171e-06	15	control_iv
GO:0014706	striated muscle tissue development	43/990	12122/1076044.5	1.98508e-13	1.92269e-12	43	control_iv
GO:0097479	synaptic vesicle localization	6/171	12122/1076044.5	0.0134868	0.0461822	6	control_iv
GO:0003229	ventricular cardiac muscle tissue development	6/78	12122/1076044.5	0.000262206	0.00130718	6	control_iv
GO:0055010	ventricular cardiac muscle tissue morphogenesis	6/66	12122/1076044.5	0.00010403	0.000559778	6	control_iv
GO:0003281	ventricular septum development	3/66	12122/1076044.5	0.0387055	0.111196	3	control_iv
	disappear gradually in total
GO:0006023	aminoglycan biosynthetic process	4/136	4589/628320.5	0.0181227	0.205432	4	control_i
GO:0072378	blood coagulation, fibrin clot formation	2/28	4589/628320.5	0.0177748	0.205432	2	control_i
GO:0016358	dendrite development	5/210	4589/628320.5	0.0197412	0.205432	5	control_i
GO:0060996	dendritic spine development	3/91	4589/628320.5	0.0294123	0.262281	3	control_i
GO:0035115	embryonic forelimb morphogenesis	2/36	4589/628320.5	0.028511	0.262281	2	control_i
GO:0035136	forelimb morphogenesis	2/45	4589/628320.5	0.0429229	0.324848	2	control_i
GO:0006024	glycosaminoglycan biosynthetic process	4/120	4589/628320.5	0.011955	0.173088	4	control_i
GO:0001822	kidney development	7/435	4589/628320.5	0.0425654	0.324848	7	control_i
GO:1903510	mucopolysaccharide metabolic process	3/105	4589/628320.5	0.0421467	0.324848	3	control_i
GO:0042476	odontogenesis	5/171	4589/628320.5	0.00879079	0.139397	5	control_i
GO:0042475	odontogenesis of dentin-containing tooth	4/91	4589/628320.5	0.00458895	0.0804274	4	control_i
GO:2000147	positive regulation of cell motility	11/703	4589/628320.5	0.0158791	0.203374	11	control_i
GO:0051272	positive regulation of cellular component movement	11/703	4589/628320.5	0.0158791	0.203374	11	control_i
GO:0040017	positive regulation of locomotion	11/780	4589/628320.5	0.0307176	0.262281	11	control_i
GO:0048168	regulation of neuronal synaptic plasticity	2/45	4589/628320.5	0.0429229	0.324848	2	control_i
GO:0048705	skeletal system morphogenesis	5/210	4589/628320.5	0.0197412	0.205432	5	control_i
GO:0070252	actin-mediated cell contraction	17/105	34695/661250	3.35725e-05	0.000100433	17	control_ii
GO:0033275	actin-myosin filament sliding	17/66	34695/661250	3.639e-08	1.18941e-07	17	control_ii
GO:0097028	dendritic cell differentiation	6/36	34695/661250	0.0104421	0.027508	6	control_ii
GO:0072676	lymphocyte migration	19/120	34695/661250	1.65219e-05	4.98481e-05	19	control_ii
GO:0006936	muscle contraction	60/741	34695/661250	0.000716552	0.00199168	60	control_ii
GO:0030049	muscle filament sliding	17/66	34695/661250	3.639e-08	1.18941e-07	17	control_ii
GO:0003012	muscle system process	74/903	34695/661250	0.00013407	0.000387925	74	control_ii
GO:0050866	negative regulation of cell activation	26/171	34695/661250	1.13328e-06	3.57185e-06	26	control_ii
GO:0050921	positive regulation of chemotaxis	15/136	34695/661250	0.00534568	0.0142956	15	control_ii
GO:0045834	positive regulation of lipid metabolic process	13/105	34695/661250	0.0034452	0.00928363	13	control_ii
GO:0051260	protein homooligomerization	33/435	34695/661250	0.0231415	0.0600658	33	control_ii
GO:0050920	regulation of chemotaxis	35/276	34695/661250	1.5466e-06	4.83141e-06	35	control_ii
GO:0002923	regulation of humoral immune response mediated by circulating immunoglobulin	3/10	34695/661250	0.0131173	0.0342994	3	control_ii
GO:2000021	regulation of ion homeostasis	23/253	34695/661250	0.00784091	0.0208108	23	control_ii
GO:0002688	regulation of leukocyte chemotaxis	25/136	34695/661250	4.35712e-08	1.41107e-07	25	control_ii
GO:0002685	regulation of leukocyte migration	25/231	34695/661250	0.000537776	0.00151868	25	control_ii
GO:0002791	regulation of peptide secretion	64/780	34695/661250	0.000347861	0.000998333	64	control_ii
GO:0050708	regulation of protein secretion	56/666	34695/661250	0.000434679	0.00123743	56	control_ii
GO:0032496	response to lipopolysaccharide	64/630	34695/661250	5.18458e-07	1.64879e-06	64	control_ii
GO:0002237	response to molecule of bacterial origin	64/630	34695/661250	5.18458e-07	1.64879e-06	64	control_ii
GO:0071356	cellular response to tumor necrosis factor	24/406	8616/710432	3.78175e-10	1.55524e-08	24	control_iii
GO:0044364	disruption of cells of other organism	6/55	8616/710432	5.53576e-05	0.00086727	6	control_iii
GO:0030900	forebrain development	20/741	8616/710432	0.000951225	0.00977978	20	control_iii
GO:0007187	G-protein coupled receptor signaling pathway, coupled to cyclic nucleotide second messenger	7/210	8616/710432	0.0148995	0.108932	7	control_iii
GO:0030902	hindbrain development	5/153	8616/710432	0.0395337	0.245407	5	control_iii
GO:0015698	inorganic anion transport	7/210	8616/710432	0.0148995	0.108932	7	control_iii
GO:0031640	killing of cells of other organism	6/55	8616/710432	5.53576e-05	0.00086727	6	control_iii
GO:0007612	learning	7/231	8616/710432	0.023661	0.162176	7	control_iii
GO:0022037	metencephalon development	5/105	8616/710432	0.00931387	0.0747381	5	control_iii
GO:0030335	positive regulation of cell migration	20/780	8616/710432	0.00173313	0.0162914	20	control_iii
GO:0032844	regulation of homeostatic process	16/820	8616/710432	0.045716	0.26387	16	control_iii
GO:0042391	regulation of membrane potential	28/946	8616/710432	2.22964e-05	0.00045847	28	control_iii
GO:0034612	response to tumor necrosis factor	24/406	8616/710432	3.78175e-10	1.55524e-08	24	control_iii
GO:0060538	skeletal muscle organ development	12/171	8616/710432	1.49377e-06	4.46772e-05	12	control_iii
GO:0046717	acid secretion	5/153	12122/1076044.5	0.0302845	0.0900565	5	control_iv
GO:0016338	calcium-independent cell-cell adhesion via plasma membrane cell-adhesion molecules	2/21	12122/1076044.5	0.0231213	0.0719093	2	control_iv
GO:0003205	cardiac chamber development	9/300	12122/1076044.5	0.00761493	0.0278902	9	control_iv
GO:0003206	cardiac chamber morphogenesis	7/210	12122/1076044.5	0.0103161	0.0368121	7	control_iv
GO:0060048	cardiac muscle contraction	6/190	12122/1076044.5	0.0214603	0.0673616	6	control_iv
GO:0055008	cardiac muscle tissue morphogenesis	8/91	12122/1076044.5	9.58813e-06	5.60409e-05	8	control_iv
GO:0003231	cardiac ventricle development	9/210	12122/1076044.5	0.000708636	0.00324632	9	control_iv
GO:0003208	cardiac ventricle morphogenesis	6/105	12122/1076044.5	0.00127061	0.00552227	6	control_iv
GO:0071229	cellular response to acid chemical	12/325	12122/1076044.5	0.000387147	0.00182282	12	control_iv
GO:0046660	female sex differentiation	5/153	12122/1076044.5	0.0302845	0.0900565	5	control_iv
GO:0060047	heart contraction	13/561	12122/1076044.5	0.0125401	0.0433786	13	control_iv
GO:0003015	heart process	13/561	12122/1076044.5	0.0125401	0.0433786	13	control_iv
GO:0050804	modulation of chemical synaptic transmission	27/1225	12122/1076044.5	0.000989583	0.00441406	27	control_iv
GO:0098815	modulation of excitatory postsynaptic potential	3/66	12122/1076044.5	0.0387055	0.111196	3	control_iv
GO:0042692	muscle cell differentiation	36/1176	12122/1076044.5	1.43939e-07	9.38373e-07	36	control_iv
GO:0007517	muscle organ development	42/946	12122/1076044.5	1.83853e-13	1.83312e-12	42	control_iv
GO:0048644	muscle organ morphogenesis	8/120	12122/1076044.5	7.10895e-05	0.000395071	8	control_iv
GO:0060537	muscle tissue development	49/1225	12122/1076044.5	9.41469e-14	9.67146e-13	49	control_iv
GO:0060415	muscle tissue morphogenesis	8/120	12122/1076044.5	7.10895e-05	0.000395071	8	control_iv
GO:0030239	myofibril assembly	21/66	12122/1076044.5	0	0	21	control_iv
GO:0030072	peptide hormone secretion	10/465	12122/1076044.5	0.0403614	0.114979	10	control_iv
GO:2000463	positive regulation of excitatory postsynaptic potential	3/36	12122/1076044.5	0.00773357	0.0278902	3	control_iv
GO:0050769	positive regulation of neurogenesis	17/903	12122/1076044.5	0.0301383	0.0900565	17	control_iv
GO:0051047	positive regulation of secretion	26/861	12122/1076044.5	9.02618e-06	5.3682e-05	26	control_iv
GO:1903532	positive regulation of secretion by cell	26/741	12122/1076044.5	6.1949e-07	3.9624e-06	26	control_iv
GO:0006937	regulation of muscle contraction	7/276	12122/1076044.5	0.0383837	0.111196	7	control_iv
GO:0048167	regulation of synaptic plasticity	10/300	12122/1076044.5	0.00242445	0.0101468	10	control_iv
GO:0002026	regulation of the force of heart contraction	3/36	12122/1076044.5	0.00773357	0.0278902	3	control_iv
GO:0070542	response to fatty acid	12/91	12122/1076044.5	5.757e-10	4.33694e-09	12	control_iv
GO:0032526	response to retinoic acid	5/136	12122/1076044.5	0.0194291	0.0621363	5	control_iv
GO:0050954	sensory perception of mechanical stimulus	9/231	12122/1076044.5	0.00137855	0.00591554	9	control_iv
GO:0023061	signal release	32/1891	12122/1076044.5	0.01744	0.0577916	32	control_iv
GO:0007519	skeletal muscle tissue development	13/210	12122/1076044.5	1.01454e-06	6.25327e-06	13	control_iv
GO:0051146	striated muscle cell differentiation	27/528	12122/1076044.5	1.59508e-10	1.22893e-09	27	control_iv
GO:0006941	striated muscle contraction	15/276	12122/1076044.5	8.0629e-07	5.06171e-06	15	control_iv
GO:0014706	striated muscle tissue development	43/990	12122/1076044.5	1.98508e-13	1.92269e-12	43	control_iv
GO:0097479	synaptic vesicle localization	6/171	12122/1076044.5	0.0134868	0.0461822	6	control_iv
GO:0003229	ventricular cardiac muscle tissue development	6/78	12122/1076044.5	0.000262206	0.00130718	6	control_iv
GO:0055010	ventricular cardiac muscle tissue morphogenesis	6/66	12122/1076044.5	0.00010403	0.000559778	6	control_iv
GO:0003281	ventricular septum development	3/66	12122/1076044.5	0.0387055	0.111196	3	control_iv
