# Supplementary material for: Co-expression based cancer staging and application
Source: Sci Rep. 2020 Jun 30;10:10624. doi: 10.1038/s41598-020-67476-7 (PMC7327081; doi:10.1038/s41598-020-67476-7)
Supplement: Supplementary file 10 — Supplementary file10 [file 41598_2020_67476_MOESM10_ESM.xlsx]

## Sheet: BRCA_Stage
ID	Description	GPRatio	BgRatio	pvalue	p.adjust	GOcount	Stages
	new pathways that are not present in controls but present in earlier stages (1 and 2)
GO:1904837	beta-catenin-TCF complex assembly	19/55	61638/787512.5	1.66832e-08	3.01581e-08	19	i
GO:0006338	chromatin remodeling	21/120	61638/787512.5	0.000406609	0.000653354	21	i
GO:0061640	cytoskeleton-dependent cytokinesis	27/36	61638/787512.5	0	0	27	i
GO:0006303	double-strand break repair via nonhomologous end joining	19/45	61638/787512.5	3.12189e-10	5.75407e-10	19	i
GO:0016458	gene silencing	162/595	61638/787512.5	0	0	162	i
GO:0035195	gene silencing by miRNA	79/253	61638/787512.5	0	0	79	i
GO:0031047	gene silencing by RNA	79/276	61638/787512.5	0	0	79	i
GO:0090307	mitotic spindle assembly	36/45	61638/787512.5	0	0	36	i
GO:1903707	negative regulation of hemopoiesis	19/91	61638/787512.5	6.94919e-05	0.000112625	19	i
GO:0045653	negative regulation of megakaryocyte differentiation	19/45	61638/787512.5	3.12189e-10	5.75407e-10	19	i
GO:0045638	negative regulation of myeloid cell differentiation	19/66	61638/787512.5	4.43586e-07	7.31528e-07	19	i
GO:0000726	non-recombinational repair	19/45	61638/787512.5	3.12189e-10	5.75407e-10	19	i
GO:0016441	posttranscriptional gene silencing	79/276	61638/787512.5	0	0	79	i
GO:0035194	posttranscriptional gene silencing by RNA	79/276	61638/787512.5	0	0	79	i
GO:0033044	regulation of chromosome organization	125/276	61638/787512.5	0	0	125	i
GO:0040029	regulation of gene expression, epigenetic	162/630	61638/787512.5	0	0	162	i
GO:0051225	spindle assembly	55/66	61638/787512.5	0	0	55	i
GO:0016233	telomere capping	20/66	61638/787512.5	8.70843e-08	1.55922e-07	20	i
GO:0000723	telomere maintenance	22/105	61638/787512.5	1.82962e-05	2.99104e-05	22	i
GO:0006066	alcohol metabolic process	18/253	1690/131072	7.79962e-09	6.1149e-07	18	i
GO:0015701	bicarbonate transport	2/15	1690/131072	0.0156072	0.107334	2	i
GO:0016051	carbohydrate biosynthetic process	9/153	1690/131072	0.000183156	0.00341892	9	i
GO:0044242	cellular lipid catabolic process	8/78	1690/131072	7.92387e-06	0.000238935	8	i
GO:0032869	cellular response to insulin stimulus	5/91	1690/131072	0.00660829	0.0720062	5	i
GO:0008203	cholesterol metabolic process	3/45	1690/131072	0.0203157	0.132729	3	i
GO:0030301	cholesterol transport	3/36	1690/131072	0.0111306	0.0855528	3	i
GO:0007588	excretion	2/21	1690/131072	0.0296665	0.183718	2	i
GO:0006631	fatty acid metabolic process	8/190	1690/131072	0.00347941	0.0439977	8	i
GO:0090077	foam cell differentiation	2/15	1690/131072	0.0156072	0.107334	2	i
GO:0015669	gas transport	2/10	1690/131072	0.00698019	0.0720062	2	i
GO:0006094	gluconeogenesis	9/55	1690/131072	3.5995e-08	1.56778e-06	9	i
GO:0006006	glucose metabolic process	9/120	1690/131072	2.80297e-05	0.000686727	9	i
GO:0046486	glycerolipid metabolic process	15/210	1690/131072	1.27941e-07	5.0153e-06	15	i
GO:0019319	hexose biosynthetic process	9/55	1690/131072	3.5995e-08	1.56778e-06	9	i
GO:0019318	hexose metabolic process	9/120	1690/131072	2.80297e-05	0.000686727	9	i
GO:0010742	macrophage derived foam cell differentiation	2/15	1690/131072	0.0156072	0.107334	2	i
GO:0046364	monosaccharide biosynthetic process	9/55	1690/131072	3.5995e-08	1.56778e-06	9	i
GO:0005996	monosaccharide metabolic process	9/120	1690/131072	2.80297e-05	0.000686727	9	i
GO:0048662	negative regulation of smooth muscle cell proliferation	2/15	1690/131072	0.0156072	0.107334	2	i
GO:1905954	positive regulation of lipid localization	4/36	1690/131072	0.00116777	0.0173599	4	i
GO:1905952	regulation of lipid localization	8/55	1690/131072	5.34532e-07	1.90488e-05	8	i
GO:0010743	regulation of macrophage derived foam cell differentiation	2/15	1690/131072	0.0156072	0.107334	2	i
GO:0014823	response to activity	2/21	1690/131072	0.0296665	0.183718	2	i
GO:0032868	response to insulin	8/136	1690/131072	0.000412945	0.00735793	8	i
GO:0015918	sterol transport	3/36	1690/131072	0.0111306	0.0855528	3	i
GO:0060249	anatomical structure homeostasis	19/666	14410/1223048	0.000471791	0.000899549	19	ii
GO:0051315	attachment of mitotic spindle microtubules to kinetochore	4/10	14410/1223048	3.82187e-06	7.53832e-06	4	ii
GO:0072378	blood coagulation, fibrin clot formation	13/55	14410/1223048	7.67164e-14	1.9079e-13	13	ii
GO:0007597	blood coagulation, intrinsic pathway	10/21	14410/1223048	1.60982e-14	4.03868e-14	10	ii
GO:0001906	cell killing	5/153	14410/1223048	0.0356461	0.0621633	5	ii
GO:0070192	chromosome organization involved in meiotic cell cycle	10/78	14410/1223048	3.11775e-08	6.36911e-08	10	ii
GO:0050817	coagulation	29/561	14410/1223048	7.50597e-11	1.66412e-10	29	ii
GO:0070268	cornification	8/276	14410/1223048	0.0176523	0.0309727	8	ii
GO:0044364	disruption of cells of other organism	5/91	14410/1223048	0.00456672	0.00821436	5	ii
GO:0031570	DNA integrity checkpoint	46/190	14410/1223048	0	0	46	ii
GO:0006260	DNA replication	71/406	14410/1223048	0	0	71	ii
GO:0006302	double-strand break repair	43/351	14410/1223048	0	0	43	ii
GO:0009913	epidermal cell differentiation	83/1035	14410/1223048	0	0	83	ii
GO:0008544	epidermis development	83/1485	14410/1223048	0	0	83	ii
GO:0006959	humoral immune response	19/1035	14410/1223048	0.0415983	0.0721038	19	ii
GO:0031424	keratinization	70/741	14410/1223048	0	0	70	ii
GO:0030216	keratinocyte differentiation	83/861	14410/1223048	0	0	83	ii
GO:0031640	killing of cells of other organism	5/91	14410/1223048	0.00456672	0.00821436	5	ii
GO:0051383	kinetochore organization	7/15	14410/1223048	1.86424e-10	4.10132e-10	7	ii
GO:0044774	mitotic DNA integrity checkpoint	25/105	14410/1223048	0	0	25	ii
GO:0000022	mitotic spindle elongation	5/10	14410/1223048	5.44251e-08	1.10394e-07	5	ii
GO:0030195	negative regulation of blood coagulation	13/91	14410/1223048	6.83511e-11	1.52722e-10	13	ii
GO:2001251	negative regulation of chromosome organization	50/136	14410/1223048	0	0	50	ii
GO:0050819	negative regulation of coagulation	13/91	14410/1223048	6.83511e-11	1.52722e-10	13	ii
GO:0051918	negative regulation of fibrinolysis	6/10	14410/1223048	5.38859e-10	1.1501e-09	6	ii
GO:1900047	negative regulation of hemostasis	13/91	14410/1223048	6.83511e-11	1.52722e-10	13	ii
GO:0051346	negative regulation of hydrolase activity	24/990	14410/1223048	0.000939294	0.00176735	24	ii
GO:0045861	negative regulation of proteolysis	18/820	14410/1223048	0.00998838	0.0177433	18	ii
GO:1903035	negative regulation of response to wounding	13/105	14410/1223048	4.27079e-10	9.18381e-10	13	ii
GO:0061045	negative regulation of wound healing	13/91	14410/1223048	6.83511e-11	1.52722e-10	13	ii
GO:0048477	oogenesis	5/78	14410/1223048	0.00234941	0.00427981	5	ii
GO:0018149	peptide cross-linking	71/190	14410/1223048	0	0	71	ii
GO:0030194	positive regulation of blood coagulation	6/21	14410/1223048	1.24564e-07	2.47397e-07	6	ii
GO:0071158	positive regulation of cell cycle arrest	17/78	14410/1223048	0	0	17	ii
GO:0050820	positive regulation of coagulation	6/21	14410/1223048	1.24564e-07	2.47397e-07	6	ii
GO:1900048	positive regulation of hemostasis	6/21	14410/1223048	1.24564e-07	2.47397e-07	6	ii
GO:0072376	protein activation cascade	32/231	14410/1223048	0	0	32	ii
GO:0030193	regulation of blood coagulation	18/120	14410/1223048	6.55032e-15	1.67267e-14	18	ii
GO:0071156	regulation of cell cycle arrest	24/105	14410/1223048	0	0	24	ii
GO:0050818	regulation of coagulation	18/120	14410/1223048	6.55032e-15	1.67267e-14	18	ii
GO:0051917	regulation of fibrinolysis	6/15	14410/1223048	1.22083e-08	2.53014e-08	6	ii
GO:1900046	regulation of hemostasis	18/120	14410/1223048	6.55032e-15	1.67267e-14	18	ii
GO:2000241	regulation of reproductive process	9/153	14410/1223048	9.49568e-05	0.000184746	9	ii
GO:0051238	sequestering of metal ion	3/15	14410/1223048	0.000669097	0.0012673	3	ii
GO:0043588	skin development	96/1176	14410/1223048	0	0	96	ii
GO:0008643	carbohydrate transport	6/55	981/138864.5	2.64247e-06	0.000246631	6	ii
GO:0046395	carboxylic acid catabolic process	3/105	981/138864.5	0.0387714	0.280983	3	ii
GO:0032602	chemokine production	2/28	981/138864.5	0.0166879	0.1532	2	ii
GO:0006091	generation of precursor metabolites and energy	6/231	981/138864.5	0.00634731	0.0683557	6	ii
GO:0046323	glucose import	3/36	981/138864.5	0.00210927	0.038103	3	ii
GO:0015758	glucose transport	3/45	981/138864.5	0.00399935	0.0500936	3	ii
GO:0008645	hexose transport	3/45	981/138864.5	0.00399935	0.0500936	3	ii
GO:0030258	lipid modification	3/105	981/138864.5	0.0387714	0.280983	3	ii
GO:0001765	membrane raft assembly	1/6	981/138864.5	0.0416457	0.280983	1	ii
GO:0015749	monosaccharide transport	3/45	981/138864.5	0.00399935	0.0500936	3	ii
GO:0016054	organic acid catabolic process	3/105	981/138864.5	0.0387714	0.280983	3	ii
GO:0050731	positive regulation of peptidyl-tyrosine phosphorylation	3/78	981/138864.5	0.0180694	0.158107	3	ii
GO:0042448	progesterone metabolic process	1/6	981/138864.5	0.0416457	0.280983	1	ii
GO:0032642	regulation of chemokine production	2/28	981/138864.5	0.0166879	0.1532	2	ii
GO:0050730	regulation of peptidyl-tyrosine phosphorylation	3/91	981/138864.5	0.02699	0.222271	3	ii
GO:0097006	regulation of plasma lipoprotein particle levels	2/28	981/138864.5	0.0166879	0.1532	2	ii
	new pathways that are not present in controls but present in advanced stages (3 and 4)
GO:0031145	anaphase-promoting complex-dependent catabolic process	37/55	3925/540800	0	0	37	iii
GO:0044839	cell cycle G2/M phase transition	137/231	3925/540800	0	0	137	iii
GO:0070192	chromosome organization involved in meiotic cell cycle	6/45	3925/540800	9.3066e-07	1.74394e-06	6	iii
GO:0070268	cornification	20/325	3925/540800	7.50844e-13	1.59363e-12	20	iii
GO:0061640	cytoskeleton-dependent cytokinesis	35/45	3925/540800	0	0	35	iii
GO:0006977	DNA damage response, signal transduction by p53 class mediator resulting in cell cycle arrest	16/45	3925/540800	0	0	16	iii
GO:0031570	DNA integrity checkpoint	47/153	3925/540800	0	0	47	iii
GO:0006260	DNA replication	73/276	3925/540800	0	0	73	iii
GO:0006302	double-strand break repair	19/190	3925/540800	4.44089e-16	9.62193e-16	19	iii
GO:0007492	endoderm development	3/55	3925/540800	0.00756758	0.0111635	3	iii
GO:0001706	endoderm formation	3/36	3925/540800	0.00228072	0.00354023	3	iii
GO:0009913	epidermal cell differentiation	30/528	3925/540800	0	0	30	iii
GO:0008544	epidermis development	30/820	3925/540800	1.38045e-12	2.90034e-12	30	iii
GO:0044783	G1 DNA damage checkpoint	16/45	3925/540800	0	0	16	iii
GO:0000086	G2/M transition of mitotic cell cycle	121/210	3925/540800	0	0	121	iii
GO:1902400	intracellular signal transduction involved in G1 DNA damage checkpoint	16/45	3925/540800	0	0	16	iii
GO:0031424	keratinization	30/378	3925/540800	0	0	30	iii
GO:0030216	keratinocyte differentiation	30/465	3925/540800	0	0	30	iii
GO:0044773	mitotic DNA damage checkpoint	16/66	3925/540800	0	0	16	iii
GO:0044774	mitotic DNA integrity checkpoint	23/91	3925/540800	0	0	23	iii
GO:0031571	mitotic G1 DNA damage checkpoint	16/45	3925/540800	0	0	16	iii
GO:0044819	mitotic G1/S transition checkpoint	16/45	3925/540800	0	0	16	iii
GO:0090307	mitotic spindle assembly	44/55	3925/540800	0	0	44	iii
GO:0000022	mitotic spindle elongation	6/10	3925/540800	2.9824e-11	5.85226e-11	6	iii
GO:0010948	negative regulation of cell cycle process	152/325	3925/540800	0	0	152	iii
GO:0061351	neural precursor cell proliferation	5/153	3925/540800	0.00542422	0.00835732	5	iii
GO:0018149	peptide cross-linking	14/66	3925/540800	0	0	14	iii
GO:0071158	positive regulation of cell cycle arrest	16/78	3925/540800	0	0	16	iii
GO:0071156	regulation of cell cycle arrest	23/91	3925/540800	0	0	23	iii
GO:0033044	regulation of chromosome organization	147/351	3925/540800	0	0	147	iii
GO:2000241	regulation of reproductive process	9/105	3925/540800	8.89988e-08	1.68289e-07	9	iii
GO:0072395	signal transduction involved in cell cycle checkpoint	16/55	3925/540800	0	0	16	iii
GO:0072422	signal transduction involved in DNA damage checkpoint	16/45	3925/540800	0	0	16	iii
GO:0072401	signal transduction involved in DNA integrity checkpoint	16/45	3925/540800	0	0	16	iii
GO:0072413	signal transduction involved in mitotic cell cycle checkpoint	16/45	3925/540800	0	0	16	iii
GO:1902402	signal transduction involved in mitotic DNA damage checkpoint	16/45	3925/540800	0	0	16	iii
GO:1902403	signal transduction involved in mitotic DNA integrity checkpoint	16/45	3925/540800	0	0	16	iii
GO:0072431	signal transduction involved in mitotic G1 DNA damage checkpoint	16/45	3925/540800	0	0	16	iii
GO:0043588	skin development	30/630	3925/540800	1.55431e-15	3.33296e-15	30	iii
GO:0051225	spindle assembly	72/91	3925/540800	0	0	72	iii
GO:0051231	spindle elongation	6/10	3925/540800	2.9824e-11	5.85226e-11	6	iii
GO:0006066	alcohol metabolic process	16/253	1912/152904.5	1.74681e-07	1.22776e-05	16	iii
GO:0015701	bicarbonate transport	2/21	1912/152904.5	0.0280402	0.215559	2	iii
GO:0016051	carbohydrate biosynthetic process	6/210	1912/152904.5	0.0497224	0.336879	6	iii
GO:0008643	carbohydrate transport	6/55	1912/152904.5	6.51507e-05	0.00213694	6	iii
GO:0046395	carboxylic acid catabolic process	8/120	1912/152904.5	0.000143742	0.00392895	8	iii
GO:0044242	cellular lipid catabolic process	10/78	1912/152904.5	5.31509e-08	5.23005e-06	10	iii
GO:0032869	cellular response to insulin stimulus	4/105	1912/152904.5	0.0432649	0.299808	4	iii
GO:0030301	cholesterol transport	3/36	1912/152904.5	0.0102512	0.103341	3	iii
GO:0006732	coenzyme metabolic process	6/190	1912/152904.5	0.0331789	0.247334	6	iii
GO:0006631	fatty acid metabolic process	9/210	1912/152904.5	0.00144223	0.0283831	9	iii
GO:0090077	foam cell differentiation	2/15	1912/152904.5	0.0147293	0.1342	2	iii
GO:0015669	gas transport	2/10	1912/152904.5	0.0065792	0.0770706	2	iii
GO:0006094	gluconeogenesis	6/66	1912/152904.5	0.000181706	0.00425712	6	iii
GO:0046323	glucose import	3/36	1912/152904.5	0.0102512	0.103341	3	iii
GO:0006006	glucose metabolic process	7/136	1912/152904.5	0.00170646	0.029985	7	iii
GO:0015758	glucose transport	3/45	1912/152904.5	0.0187575	0.156418	3	iii
GO:0019319	hexose biosynthetic process	6/66	1912/152904.5	0.000181706	0.00425712	6	iii
GO:0019318	hexose metabolic process	7/136	1912/152904.5	0.00170646	0.029985	7	iii
GO:0008645	hexose transport	3/45	1912/152904.5	0.0187575	0.156418	3	iii
GO:0042743	hydrogen peroxide metabolic process	2/15	1912/152904.5	0.0147293	0.1342	2	iii
GO:0010742	macrophage derived foam cell differentiation	2/15	1912/152904.5	0.0147293	0.1342	2	iii
GO:0046364	monosaccharide biosynthetic process	6/66	1912/152904.5	0.000181706	0.00425712	6	iii
GO:0005996	monosaccharide metabolic process	7/136	1912/152904.5	0.00170646	0.029985	7	iii
GO:0015749	monosaccharide transport	3/45	1912/152904.5	0.0187575	0.156418	3	iii
GO:0033002	muscle cell proliferation	4/91	1912/152904.5	0.0276698	0.215559	4	iii
GO:0016054	organic acid catabolic process	8/120	1912/152904.5	0.000143742	0.00392895	8	iii
GO:1905954	positive regulation of lipid localization	5/36	1912/152904.5	8.30606e-05	0.00255411	5	iii
GO:0072593	reactive oxygen species metabolic process	5/105	1912/152904.5	0.0105022	0.103341	5	iii
GO:1905952	regulation of lipid localization	9/66	1912/152904.5	1.43184e-07	1.17411e-05	9	iii
GO:0010743	regulation of macrophage derived foam cell differentiation	2/15	1912/152904.5	0.0147293	0.1342	2	iii
GO:0050730	regulation of peptidyl-tyrosine phosphorylation	4/105	1912/152904.5	0.0432649	0.299808	4	iii
GO:0032868	response to insulin	8/190	1912/152904.5	0.00289833	0.0419405	8	iii
GO:0044282	small molecule catabolic process	8/210	1912/152904.5	0.00527776	0.0683331	8	iii
GO:0015918	sterol transport	3/36	1912/152904.5	0.0102512	0.103341	3	iii
GO:0061844	antimicrobial humoral immune response mediated by antimicrobial peptide	4/28	7386/334562	0.0031815	0.00643936	4	iv
GO:0019730	antimicrobial humoral response	7/66	7386/334562	0.000635673	0.00129698	7	iv
GO:0007411	axon guidance	10/231	7386/334562	0.0338451	0.0639015	10	iv
GO:0007050	cell cycle arrest	30/210	7386/334562	8.88178e-16	2.52482e-15	30	iv
GO:0044843	cell cycle G1/S phase transition	123/276	7386/334562	0	0	123	iv
GO:0042742	defense response to bacterium	10/210	7386/334562	0.0191608	0.0378726	10	iv
GO:0000077	DNA damage checkpoint	30/91	7386/334562	0	0	30	iv
GO:0000076	DNA replication checkpoint	2/10	7386/334562	0.0194922	0.0379347	2	iv
GO:0035987	endodermal cell differentiation	3/28	7386/334562	0.0233502	0.0450963	3	iv
GO:0051656	establishment of organelle localization	91/406	7386/334562	0	0	91	iv
GO:0000082	G1/S transition of mitotic cell cycle	92/231	7386/334562	0	0	92	iv
GO:0016572	histone phosphorylation	10/28	7386/334562	2.49306e-10	5.73403e-10	10	iv
GO:0051383	kinetochore organization	4/10	7386/334562	4.48007e-05	9.52486e-05	4	iv
GO:0001578	microtubule bundle formation	4/55	7386/334562	0.0332389	0.0637079	4	iv
GO:0050804	modulation of chemical synaptic transmission	11/231	7386/334562	0.0144883	0.0288626	11	iv
GO:1901988	negative regulation of cell cycle phase transition	90/231	7386/334562	0	0	90	iv
GO:2001251	negative regulation of chromosome organization	53/78	7386/334562	0	0	53	iv
GO:0045930	negative regulation of mitotic cell cycle	127/325	7386/334562	0	0	127	iv
GO:1901991	negative regulation of mitotic cell cycle phase transition	90/231	7386/334562	0	0	90	iv
GO:0097485	neuron projection guidance	10/231	7386/334562	0.0338451	0.0639015	10	iv
GO:0051984	positive regulation of chromosome segregation	8/15	7386/334562	3.14963e-10	7.11478e-10	8	iv
GO:0045931	positive regulation of mitotic cell cycle	65/105	7386/334562	0	0	65	iv
GO:0045840	positive regulation of mitotic nuclear division	20/28	7386/334562	0	0	20	iv
GO:1904668	positive regulation of ubiquitin protein ligase activity	18/45	7386/334562	0	0	18	iv
GO:0051443	positive regulation of ubiquitin-protein transferase activity	18/55	7386/334562	1.11022e-16	3.22858e-16	18	iv
GO:1902749	regulation of cell cycle G2/M phase transition	64/136	7386/334562	0	0	64	iv
GO:0000079	regulation of cyclin-dependent protein serine/threonine kinase activity	12/45	7386/334562	1.94167e-10	4.5068e-10	12	iv
GO:0006953	acute-phase response	5/21	15550/259920.5	0.00694647	0.0723502	5	iv
GO:0007568	aging	32/210	15550/259920.5	1.1868e-06	8.03467e-05	32	iv
GO:0043534	blood vessel endothelial cell migration	7/45	15550/259920.5	0.0167532	0.141774	7	iv
GO:0060326	cell chemotaxis	37/253	15550/259920.5	5.20184e-07	5.03093e-05	37	iv
GO:0002042	cell migration involved in sprouting angiogenesis	5/28	15550/259920.5	0.0237268	0.178478	5	iv
GO:0099565	chemical synaptic transmission, postsynaptic	8/66	15550/259920.5	0.0427816	0.275443	8	iv
GO:0007623	circadian rhythm	11/105	15550/259920.5	0.0497502	0.307549	11	iv
GO:0050890	cognition	72/406	15550/259920.5	2.22045e-16	1.50324e-13	72	iv
GO:0055123	digestive system development	19/105	15550/259920.5	1.42767e-05	0.000460252	19	iv
GO:0048565	digestive tract development	19/91	15550/259920.5	1.58122e-06	8.9207e-05	19	iv
GO:0050673	epithelial cell proliferation	50/406	15550/259920.5	1.32566e-06	8.15884e-05	50	iv
GO:0070371	ERK1 and ERK2 cascade	29/190	15550/259920.5	3.5337e-06	0.000172571	29	iv
GO:0042063	gliogenesis	23/171	15550/259920.5	0.000241879	0.00511725	23	iv
GO:0046486	glycerolipid metabolic process	46/406	15550/259920.5	2.93459e-05	0.000794686	46	iv
GO:0030212	hyaluronan metabolic process	5/28	15550/259920.5	0.0237268	0.178478	5	iv
GO:0048017	inositol lipid-mediated signaling	20/105	15550/259920.5	3.82359e-06	0.000172571	20	iv
GO:0007612	learning	24/105	15550/259920.5	1.116e-08	1.25922e-06	24	iv
GO:0007611	learning or memory	63/351	15550/259920.5	6.77236e-15	2.29244e-12	63	iv
GO:0030595	leukocyte chemotaxis	15/120	15550/259920.5	0.00545325	0.0642503	15	iv
GO:0050900	leukocyte migration	33/351	15550/259920.5	0.00736233	0.0743925	33	iv
GO:0060291	long-term synaptic potentiation	8/45	15550/259920.5	0.00481837	0.0627314	8	iv
GO:0031579	membrane raft organization	3/10	15550/259920.5	0.0186895	0.150881	3	iv
GO:0007613	memory	17/91	15550/259920.5	2.57903e-05	0.000770005	17	iv
GO:0033555	multicellular organismal response to stress	12/36	15550/259920.5	6.75002e-07	5.7122e-05	12	iv
GO:0097529	myeloid leukocyte migration	16/136	15550/259920.5	0.00751603	0.0748287	16	iv
GO:0030818	negative regulation of cAMP biosynthetic process	5/21	15550/259920.5	0.00694647	0.0723502	5	iv
GO:0030815	negative regulation of cAMP metabolic process	5/21	15550/259920.5	0.00694647	0.0723502	5	iv
GO:0030336	negative regulation of cell migration	28/190	15550/259920.5	1.01536e-05	0.000343699	28	iv
GO:2000146	negative regulation of cell motility	30/210	15550/259920.5	9.39814e-06	0.00033487	30	iv
GO:0051271	negative regulation of cellular component movement	30/231	15550/259920.5	5.90959e-05	0.0013336	30	iv
GO:0030803	negative regulation of cyclic nucleotide biosynthetic process	5/21	15550/259920.5	0.00694647	0.0723502	5	iv
GO:0030800	negative regulation of cyclic nucleotide metabolic process	5/21	15550/259920.5	0.00694647	0.0723502	5	iv
GO:0040013	negative regulation of locomotion	30/231	15550/259920.5	5.90959e-05	0.0013336	30	iv
GO:0030809	negative regulation of nucleotide biosynthetic process	5/21	15550/259920.5	0.00694647	0.0723502	5	iv
GO:1900372	negative regulation of purine nucleotide biosynthetic process	5/21	15550/259920.5	0.00694647	0.0723502	5	iv
GO:0009165	nucleotide biosynthetic process	20/210	15550/259920.5	0.0276872	0.201551	20	iv
GO:0001503	ossification	37/300	15550/259920.5	2.80134e-05	0.000790211	37	iv
GO:0018212	peptidyl-tyrosine modification	42/253	15550/259920.5	2.20417e-09	2.98445e-07	42	iv
GO:0018108	peptidyl-tyrosine phosphorylation	42/253	15550/259920.5	2.20417e-09	2.98445e-07	42	iv
GO:0014065	phosphatidylinositol 3-kinase signaling	18/91	15550/259920.5	6.59797e-06	0.000262755	18	iv
GO:0048015	phosphatidylinositol-mediated signaling	20/105	15550/259920.5	3.82359e-06	0.000172571	20	iv
GO:0050918	positive chemotaxis	5/28	15550/259920.5	0.0237268	0.178478	5	iv
GO:0050679	positive regulation of epithelial cell proliferation	24/171	15550/259920.5	9.23141e-05	0.00201602	24	iv
GO:0060193	positive regulation of lipase activity	6/36	15550/259920.5	0.0189437	0.150881	6	iv
GO:0050731	positive regulation of peptidyl-tyrosine phosphorylation	13/91	15550/259920.5	0.00297253	0.041925	13	iv
GO:0010518	positive regulation of phospholipase activity	6/28	15550/259920.5	0.00550446	0.0642503	6	iv
GO:0010863	positive regulation of phospholipase C activity	6/28	15550/259920.5	0.00550446	0.0642503	6	iv
GO:0051897	positive regulation of protein kinase B signaling	12/91	15550/259920.5	0.00803834	0.078869	12	iv
GO:0050806	positive regulation of synaptic transmission	14/105	15550/259920.5	0.00399611	0.0541073	14	iv
GO:0043491	protein kinase B signaling	32/231	15550/259920.5	9.25637e-06	0.00033487	32	iv
GO:0050795	regulation of behavior	11/55	15550/259920.5	0.000359676	0.00676392	11	iv
GO:0050678	regulation of epithelial cell proliferation	43/378	15550/259920.5	4.74641e-05	0.00123589	43	iv
GO:0050727	regulation of inflammatory response	27/276	15550/259920.5	0.00871601	0.0842963	27	iv
GO:0010517	regulation of phospholipase activity	7/45	15550/259920.5	0.0167532	0.141774	7	iv
GO:1900274	regulation of phospholipase C activity	6/28	15550/259920.5	0.00550446	0.0642503	6	iv
GO:0060078	regulation of postsynaptic membrane potential	17/136	15550/259920.5	0.00323181	0.0446518	17	iv
GO:0051896	regulation of protein kinase B signaling	21/153	15550/259920.5	0.000333582	0.00645243	21	iv
GO:0048167	regulation of synaptic plasticity	23/136	15550/259920.5	6.18413e-06	0.000261666	23	iv
GO:0051966	regulation of synaptic transmission, glutamatergic	9/45	15550/259920.5	0.00121207	0.0186493	9	iv
GO:0032355	response to estradiol	15/136	15550/259920.5	0.016423	0.141774	15	iv
GO:0019233	sensory perception of pain	18/120	15550/259920.5	0.000289148	0.00593192	18	iv
GO:0030431	sleep	6/36	15550/259920.5	0.0189437	0.150881	6	iv
GO:0035725	sodium ion transmembrane transport	9/78	15550/259920.5	0.043127	0.275443	9	iv
GO:0035249	synaptic transmission, glutamatergic	9/55	15550/259920.5	0.00508063	0.064066	9	iv

## Sheet: COAD_Stage
ID	Description	GPRatio	BgRatio	pvalue	p.adjust	GOcount	Stages
	new pathways that are not present in controls but present in earlier stages (1 and 2)
GO:0000183	chromatin silencing at rDNA	28/36	385089/1475762	1.37106e-10	4.22285e-09	28	i
GO:0006335	DNA replication-dependent nucleosome assembly	28/36	385089/1475762	1.37106e-10	4.22285e-09	28	i
GO:0034723	DNA replication-dependent nucleosome organization	28/36	385089/1475762	1.37106e-10	4.22285e-09	28	i
GO:0030219	megakaryocyte differentiation	28/55	385089/1475762	7.35689e-05	0.0014162	28	i
GO:0045653	negative regulation of megakaryocyte differentiation	10/15	385089/1475762	0.0011445	0.0195837	10	i
GO:0006334	nucleosome assembly	78/91	385089/1475762	0	0	78	i
GO:0045815	positive regulation of gene expression, epigenetic	28/45	385089/1475762	3.72752e-07	8.20053e-06	28	i
GO:0051291	protein heterooligomerization	36/91	385089/1475762	0.00341952	0.0405081	36	i
GO:0051290	protein heterotetramerization	36/45	385089/1475762	6.30607e-14	4.85567e-12	36	i
GO:0060964	regulation of gene silencing by miRNA	28/66	385089/1475762	0.00288712	0.0370513	28	i
GO:0060966	regulation of gene silencing by RNA	28/66	385089/1475762	0.00288712	0.0370513	28	i
GO:0045652	regulation of megakaryocyte differentiation	28/45	385089/1475762	3.72752e-07	8.20053e-06	28	i
GO:0060147	regulation of posttranscriptional gene silencing	28/66	385089/1475762	0.00288712	0.0370513	28	i
GO:0001508	action potential	25/105	11763/265720.5	4.22973e-12	1.26363e-10	25	i
GO:0051899	membrane depolarization	10/66	11763/265720.5	0.000625487	0.00271803	10	i
GO:0055001	muscle cell development	10/105	11763/265720.5	0.0182058	0.0478153	10	i
GO:0030239	myofibril assembly	7/36	11763/265720.5	0.00089335	0.00381269	7	i
GO:0007269	neurotransmitter secretion	12/105	11763/265720.5	0.00240537	0.00787511	12	i
GO:0050806	positive regulation of synaptic transmission	10/78	11763/265720.5	0.0023092	0.00787511	10	i
GO:0006813	potassium ion transport	26/276	11763/265720.5	0.000277809	0.00138326	26	i
GO:0099531	presynaptic process involved in chemical synaptic transmission	12/105	11763/265720.5	0.00240537	0.00787511	12	i
GO:0002027	regulation of heart rate	10/66	11763/265720.5	0.000625487	0.00271803	10	i
GO:0032844	regulation of homeostatic process	29/435	11763/265720.5	0.0201128	0.0505996	29	i
GO:0032412	regulation of ion transmembrane transporter activity	23/210	11763/265720.5	6.66593e-05	0.000408502	23	i
GO:0001505	regulation of neurotransmitter levels	17/190	11763/265720.5	0.00490222	0.0142882	17	i
GO:0043266	regulation of potassium ion transport	7/66	11763/265720.5	0.0265117	0.0646562	7	i
GO:0010880	regulation of release of sequestered calcium ion into cytosol by sarcoplasmic reticulum	5/21	11763/265720.5	0.0019047	0.00669447	5	i
GO:0060314	regulation of ryanodine-sensitive calcium-release channel activity	4/15	11763/265720.5	0.0035356	0.0106963	4	i
GO:0006942	regulation of striated muscle contraction	11/55	11763/265720.5	2.49812e-05	0.000192597	11	i
GO:0022898	regulation of transmembrane transporter activity	23/210	11763/265720.5	6.66593e-05	0.000408502	23	i
GO:1903514	release of sequestered calcium ion into cytosol by endoplasmic reticulum	5/21	11763/265720.5	0.0019047	0.00669447	5	i
GO:0014808	release of sequestered calcium ion into cytosol by sarcoplasmic reticulum	5/21	11763/265720.5	0.0019047	0.00669447	5	i
GO:0070296	sarcoplasmic reticulum calcium ion transport	5/21	11763/265720.5	0.0019047	0.00669447	5	i
GO:0099643	signal release from synapse	12/105	11763/265720.5	0.00240537	0.00787511	12	i
GO:0031497	chromatin assembly	120/153	143619/1249780.5	0	0	120	ii
GO:0006333	chromatin assembly or disassembly	120/153	143619/1249780.5	0	0	120	ii
GO:0006342	chromatin silencing	78/91	143619/1249780.5	0	0	78	ii
GO:0006323	DNA packaging	120/171	143619/1249780.5	0	0	120	ii
GO:0045814	negative regulation of gene expression, epigenetic	78/91	143619/1249780.5	0	0	78	ii
GO:0045638	negative regulation of myeloid cell differentiation	15/55	143619/1249780.5	0.00105627	0.0115767	15	ii
GO:0034728	nucleosome organization	120/153	143619/1249780.5	0	0	120	ii
GO:0018149	peptide cross-linking	15/55	143619/1249780.5	0.00105627	0.0115767	15	ii
GO:0060968	regulation of gene silencing	36/78	143619/1249780.5	2.24265e-14	3.41381e-13	36	ii
GO:0045637	regulation of myeloid cell differentiation	36/171	143619/1249780.5	0.00023883	0.0028452	36	ii
GO:2000736	regulation of stem cell differentiation	36/91	143619/1249780.5	6.39022e-12	9.21537e-11	36	ii
GO:0016233	telomere capping	15/28	143619/1249780.5	6.87494e-08	8.56243e-07	15	ii
GO:0019722	calcium-mediated signaling	29/120	6472/231880.5	0	0	29	ii
GO:0051928	positive regulation of calcium ion transport	9/66	6472/231880.5	8.9944e-05	0.00024063	9	ii
GO:2001259	positive regulation of cation channel activity	5/28	6472/231880.5	0.000971878	0.00238342	5	ii
GO:1904064	positive regulation of cation transmembrane transport	10/66	6472/231880.5	1.44174e-05	4.01348e-05	10	ii
GO:1901019	regulation of calcium ion transmembrane transporter activity	20/45	6472/231880.5	0	0	20	ii
GO:2001257	regulation of cation channel activity	23/91	6472/231880.5	5.55112e-16	2.1576e-15	23	ii
	new pathways that are not present in controls but present in advanced stages (3 and 4)
GO:0031497	chromatin assembly	189/231	104838/1291224.5	0	0	189	iii
GO:0006333	chromatin assembly or disassembly	189/231	104838/1291224.5	0	0	189	iii
GO:0006342	chromatin silencing	78/91	104838/1291224.5	0	0	78	iii
GO:0000183	chromatin silencing at rDNA	36/45	104838/1291224.5	0	0	36	iii
GO:0071103	DNA conformation change	189/253	104838/1291224.5	0	0	189	iii
GO:0006323	DNA packaging	189/253	104838/1291224.5	0	0	189	iii
GO:0006335	DNA replication-dependent nucleosome assembly	36/45	104838/1291224.5	0	0	36	iii
GO:0034723	DNA replication-dependent nucleosome organization	36/45	104838/1291224.5	0	0	36	iii
GO:0030219	megakaryocyte differentiation	36/66	104838/1291224.5	0	0	36	iii
GO:0045814	negative regulation of gene expression, epigenetic	78/91	104838/1291224.5	0	0	78	iii
GO:0045653	negative regulation of megakaryocyte differentiation	15/21	104838/1291224.5	1.4817e-12	1.57189e-11	15	iii
GO:0045638	negative regulation of myeloid cell differentiation	15/55	104838/1291224.5	2.25321e-05	0.000219914	15	iii
GO:0006334	nucleosome assembly	189/210	104838/1291224.5	0	0	189	iii
GO:0034728	nucleosome organization	189/231	104838/1291224.5	0	0	189	iii
GO:0045815	positive regulation of gene expression, epigenetic	36/55	104838/1291224.5	0	0	36	iii
GO:0051291	protein heterooligomerization	36/136	104838/1291224.5	1.59792e-10	1.62455e-09	36	iii
GO:0051290	protein heterotetramerization	36/55	104838/1291224.5	0	0	36	iii
GO:0065004	protein-DNA complex assembly	189/210	104838/1291224.5	0	0	189	iii
GO:0071824	protein-DNA complex subunit organization	189/231	104838/1291224.5	0	0	189	iii
GO:0060968	regulation of gene silencing	36/91	104838/1291224.5	2.22045e-16	2.57995e-15	36	iii
GO:0060964	regulation of gene silencing by miRNA	36/91	104838/1291224.5	2.22045e-16	2.57995e-15	36	iii
GO:0060966	regulation of gene silencing by RNA	36/91	104838/1291224.5	2.22045e-16	2.57995e-15	36	iii
GO:0045652	regulation of megakaryocyte differentiation	36/55	104838/1291224.5	0	0	36	iii
GO:0060147	regulation of posttranscriptional gene silencing	36/91	104838/1291224.5	2.22045e-16	2.57995e-15	36	iii
GO:2000736	regulation of stem cell differentiation	36/105	104838/1291224.5	3.24185e-14	3.59551e-13	36	iii
GO:0007269	neurotransmitter secretion	9/66	6200/172872	0.000569217	0.00128731	9	iii
GO:0051928	positive regulation of calcium ion transport	7/55	6200/172872	0.00341551	0.00727653	7	iii
GO:0006813	potassium ion transport	31/190	6200/172872	2.19524e-12	1.1525e-11	31	iii
GO:0002027	regulation of heart rate	9/45	6200/172872	2.67936e-05	7.16119e-05	9	iii
GO:0001505	regulation of neurotransmitter levels	24/120	6200/172872	7.55807e-12	3.83116e-11	24	iii
GO:1901379	regulation of potassium ion transmembrane transport	8/36	6200/172872	3.35068e-05	8.64123e-05	8	iii
GO:0043266	regulation of potassium ion transport	9/45	6200/172872	2.67936e-05	7.16119e-05	9	iii
GO:0010880	regulation of release of sequestered calcium ion into cytosol by sarcoplasmic reticulum	6/15	6200/172872	8.03148e-06	2.36125e-05	6	iii
GO:0010896	regulation of triglyceride catabolic process	2/10	6200/172872	0.0477907	0.0867313	2	iii
GO:0099643	signal release from synapse	9/66	6200/172872	0.000569217	0.00128731	9	iii
GO:0060349	bone morphogenesis	5/66	4597/535612.5	0.000268916	0.00435644	5	iv
GO:0051216	cartilage development	7/190	4597/535612.5	0.00138834	0.0187426	7	iv
GO:0030574	collagen catabolic process	8/105	4597/535612.5	3.90075e-06	0.000236971	8	iv
GO:0032963	collagen metabolic process	8/153	4597/535612.5	6.02032e-05	0.00202466	8	iv
GO:0061448	connective tissue development	8/253	4597/535612.5	0.00171488	0.0219324	8	iv
GO:0070268	cornification	14/465	4597/535612.5	6.66556e-05	0.00202466	14	iv
GO:0009953	dorsal/ventral pattern formation	4/91	4597/535612.5	0.00801918	0.0721727	4	iv
GO:0048562	embryonic organ morphogenesis	11/595	4597/535612.5	0.0152601	0.123607	11	iv
GO:0035270	endocrine system development	4/91	4597/535612.5	0.00801918	0.0721727	4	iv
GO:0007492	endoderm development	3/91	4597/535612.5	0.0439834	0.296888	3	iv
GO:0001706	endoderm formation	3/36	4597/535612.5	0.00365127	0.0403299	3	iv
GO:0009913	epidermal cell differentiation	14/903	4597/535612.5	0.0266675	0.202506	14	iv
GO:0030198	extracellular matrix organization	28/595	4597/535612.5	9.92539e-13	8.03957e-11	28	iv
GO:0043062	extracellular structure organization	28/595	4597/535612.5	9.92539e-13	8.03957e-11	28	iv
GO:0001704	formation of primary germ layer	3/91	4597/535612.5	0.0439834	0.296888	3	iv
GO:0031424	keratinization	14/561	4597/535612.5	0.000449602	0.00682834	14	iv
GO:0030216	keratinocyte differentiation	14/820	4597/535612.5	0.0129174	0.108239	14	iv
GO:0044259	multicellular organismal macromolecule metabolic process	8/153	4597/535612.5	6.02032e-05	0.00202466	8	iv
GO:0007389	pattern specification process	18/1275	4597/535612.5	0.0300952	0.22161	18	iv
GO:0018149	peptide cross-linking	12/55	4597/535612.5	4.90719e-14	1.19245e-11	12	iv
GO:0002690	positive regulation of leukocyte chemotaxis	4/66	4597/535612.5	0.00255867	0.0296075	4	iv
GO:0002687	positive regulation of leukocyte migration	4/78	4597/535612.5	0.00467038	0.0493435	4	iv
GO:0003002	regionalization	14/903	4597/535612.5	0.0266675	0.202506	14	iv
GO:0071622	regulation of granulocyte chemotaxis	4/45	4597/535612.5	0.000609883	0.00871774	4	iv
GO:0002688	regulation of leukocyte chemotaxis	4/66	4597/535612.5	0.00255867	0.0296075	4	iv
GO:0048705	skeletal system morphogenesis	7/378	4597/535612.5	0.0465516	0.297685	7	iv
GO:0050851	antigen receptor-mediated signaling pathway	56/171	8372/234612.5	0	0	56	iv
GO:0042113	B cell activation	57/231	8372/234612.5	0	0	57	iv
GO:0050871	positive regulation of B cell activation	56/120	8372/234612.5	0	0	56	iv
GO:0050864	regulation of B cell activation	56/153	8372/234612.5	0	0	56	iv
GO:0002697	regulation of immune effector process	168/528	8372/234612.5	0	0	168	iv

## Sheet: HNSC_Stage
ID	Description	GPRatio	BgRatio	pvalue	p.adjust	GOcount	Stages
	new pathways that are not present in controls but present in earlier stages (1 and 2)
GO:0002460	adaptive immune response based on somatic recombination of immune receptors built from immunoglobulin superfamily domains	71/190	1428/60204.5	0	0	71	i
GO:0050851	antigen receptor-mediated signaling pathway	28/66	1428/60204.5	0	0	28	i
GO:0042113	B cell activation	29/91	1428/60204.5	0	0	29	i
GO:0019724	B cell mediated immunity	71/136	1428/60204.5	0	0	71	i
GO:0050853	B cell receptor signaling pathway	28/66	1428/60204.5	0	0	28	i
GO:0051216	cartilage development	16/105	1428/60204.5	3.99099e-09	1.35409e-08	16	i
GO:0008037	cell recognition	28/105	1428/60204.5	0	0	28	i
GO:0071357	cellular response to type I interferon	18/45	1428/60204.5	0	0	18	i
GO:0002062	chondrocyte differentiation	5/45	1428/60204.5	0.0041486	0.0112605	5	i
GO:0061448	connective tissue development	21/136	1428/60204.5	1.19771e-11	4.13754e-11	21	i
GO:0042742	defense response to bacterium	28/136	1428/60204.5	0	0	28	i
GO:0051607	defense response to virus	20/66	1428/60204.5	0	0	20	i
GO:0048706	embryonic skeletal system development	7/120	1428/60204.5	0.0246081	0.0631828	7	i
GO:0001958	endochondral ossification	2/10	1428/60204.5	0.0222944	0.0580266	2	i
GO:0007492	endoderm development	7/78	1428/60204.5	0.0025454	0.00700908	7	i
GO:0001706	endoderm formation	7/55	1428/60204.5	0.000312749	0.000914188	7	i
GO:0022617	extracellular matrix disassembly	11/78	1428/60204.5	2.33873e-06	7.79577e-06	11	i
GO:0002431	Fc receptor mediated stimulatory signaling pathway	25/66	1428/60204.5	0	0	25	i
GO:0038093	Fc receptor signaling pathway	25/66	1428/60204.5	0	0	25	i
GO:0038094	Fc-gamma receptor signaling pathway	25/66	1428/60204.5	0	0	25	i
GO:0038096	Fc-gamma receptor signaling pathway involved in phagocytosis	25/66	1428/60204.5	0	0	25	i
GO:0001704	formation of primary germ layer	7/78	1428/60204.5	0.0025454	0.00700908	7	i
GO:0007369	gastrulation	7/78	1428/60204.5	0.0025454	0.00700908	7	i
GO:0002429	immune response-activating cell surface receptor signaling pathway	71/171	1428/60204.5	0	0	71	i
GO:0002768	immune response-regulating cell surface receptor signaling pathway	71/171	1428/60204.5	0	0	71	i
GO:0002433	immune response-regulating cell surface receptor signaling pathway involved in phagocytosis	25/66	1428/60204.5	0	0	25	i
GO:0016064	immunoglobulin mediated immune response	71/136	1428/60204.5	0	0	71	i
GO:0050900	leukocyte migration	15/190	1428/60204.5	5.43443e-05	0.000166539	15	i
GO:0002449	lymphocyte mediated immunity	71/153	1428/60204.5	0	0	71	i
GO:0010324	membrane invagination	28/55	1428/60204.5	0	0	28	i
GO:0043901	negative regulation of multi-organism process	6/36	1428/60204.5	0.000186569	0.000553877	6	i
GO:0045071	negative regulation of viral genome replication	6/21	1428/60204.5	7.04325e-06	2.1938e-05	6	i
GO:1903901	negative regulation of viral life cycle	6/21	1428/60204.5	7.04325e-06	2.1938e-05	6	i
GO:0048525	negative regulation of viral process	6/21	1428/60204.5	7.04325e-06	2.1938e-05	6	i
GO:0001503	ossification	10/136	1428/60204.5	0.00157001	0.00451974	10	i
GO:0006909	phagocytosis	71/153	1428/60204.5	0	0	71	i
GO:0099024	plasma membrane invagination	28/55	1428/60204.5	0	0	28	i
GO:0050871	positive regulation of B cell activation	28/55	1428/60204.5	0	0	28	i
GO:0002696	positive regulation of leukocyte activation	28/78	1428/60204.5	0	0	28	i
GO:0051604	protein maturation	26/153	1428/60204.5	4.21885e-15	1.51242e-14	26	i
GO:0016485	protein processing	26/153	1428/60204.5	4.21885e-15	1.51242e-14	26	i
GO:0002673	regulation of acute inflammatory response	25/55	1428/60204.5	0	0	25	i
GO:0050864	regulation of B cell activation	28/66	1428/60204.5	0	0	28	i
GO:0030449	regulation of complement activation	25/55	1428/60204.5	0	0	25	i
GO:0002697	regulation of immune effector process	26/136	1428/60204.5	2.22045e-16	8.60989e-16	26	i
GO:0050727	regulation of inflammatory response	25/136	1428/60204.5	2.10942e-15	7.85864e-15	25	i
GO:0043900	regulation of multi-organism process	6/91	1428/60204.5	0.0213691	0.057185	6	i
GO:2000257	regulation of protein activation cascade	25/55	1428/60204.5	0	0	25	i
GO:1903317	regulation of protein maturation	25/91	1428/60204.5	0	0	25	i
GO:0070613	regulation of protein processing	25/91	1428/60204.5	0	0	25	i
GO:0045069	regulation of viral genome replication	6/21	1428/60204.5	7.04325e-06	2.1938e-05	6	i
GO:0036075	replacement ossification	2/10	1428/60204.5	0.0222944	0.0580266	2	i
GO:0034340	response to type I interferon	18/45	1428/60204.5	0	0	18	i
GO:0009615	response to virus	20/78	1428/60204.5	1.55431e-15	5.90639e-15	20	i
GO:0001501	skeletal system development	57/741	1428/60204.5	1.45439e-14	5.11731e-14	57	i
GO:0060337	type I interferon signaling pathway	18/45	1428/60204.5	0	0	18	i
GO:0055006	cardiac cell development	18/55	26804/475312.5	6.29836e-10	1.77323e-09	18	i
GO:0060271	cilium assembly	32/378	26804/475312.5	0.0154026	0.0327753	32	i
GO:0044782	cilium organization	38/465	26804/475312.5	0.0151605	0.0326396	38	i
GO:0019373	epoxygenase P450 pathway	3/15	26804/475312.5	0.0490089	0.0974852	3	i
GO:2001259	positive regulation of cation channel activity	7/36	26804/475312.5	0.00355454	0.00803063	7	i
GO:0032414	positive regulation of ion transmembrane transporter activity	8/66	26804/475312.5	0.0318268	0.0661852	8	i
GO:0043462	regulation of ATPase activity	17/55	26804/475312.5	5.04939e-09	1.37916e-08	17	i
GO:0043502	regulation of muscle adaptation	28/66	26804/475312.5	0	0	28	i
GO:1901077	regulation of relaxation of muscle	3/10	26804/475312.5	0.0159455	0.0335405	3	i
GO:0090075	relaxation of muscle	12/21	26804/475312.5	1.87628e-10	5.53806e-10	12	i
GO:0022412	cellular process involved in reproduction in multicellular organism	3/190	634/149604.5	0.0476933	0.176098	3	ii
GO:0046546	development of primary male sexual characteristics	2/78	634/149604.5	0.0435818	0.165152	2	ii
GO:0045137	development of primary sexual characteristics	4/153	634/149604.5	0.0042635	0.0245578	4	ii
GO:0007292	female gamete generation	2/66	634/149604.5	0.0321745	0.159763	2	ii
GO:0007281	germ cell development	2/78	634/149604.5	0.0435818	0.165152	2	ii
GO:0008406	gonad development	4/153	634/149604.5	0.0042635	0.0245578	4	ii
GO:0008584	male gonad development	2/78	634/149604.5	0.0435818	0.165152	2	ii
GO:0032103	positive regulation of response to external stimulus	10/91	634/149604.5	8.22387e-12	1.18424e-10	10	ii
GO:0043949	regulation of cAMP-mediated signaling	3/10	634/149604.5	8.89069e-06	8.53506e-05	3	ii
GO:0048608	reproductive structure development	5/435	634/149604.5	0.0390455	0.165152	5	ii
GO:0061458	reproductive system development	5/435	634/149604.5	0.0390455	0.165152	5	ii
GO:0090596	sensory organ morphogenesis	4/210	634/149604.5	0.0126815	0.0702359	4	ii
GO:0007548	sex differentiation	4/231	634/149604.5	0.0173813	0.0927004	4	ii
GO:0048705	skeletal system morphogenesis	3/153	634/149604.5	0.0277736	0.142835	3	ii
GO:0010818	T cell chemotaxis	3/15	634/149604.5	3.31817e-05	0.000251482	3	ii
GO:0072678	T cell migration	3/15	634/149604.5	3.31817e-05	0.000251482	3	ii
GO:0034505	tooth mineralization	1/10	634/149604.5	0.0415804	0.165152	1	ii
GO:0060065	uterus development	1/10	634/149604.5	0.0415804	0.165152	1	ii
GO:0007015	actin filament organization	108/435	25765/444624.5	0	0	108	ii
GO:0007512	adult heart development	3/10	25765/444624.5	0.0171574	0.0280457	3	ii
GO:0070509	calcium ion import	15/45	25765/444624.5	1.80611e-08	3.69926e-08	15	ii
GO:0051494	negative regulation of cytoskeleton organization	15/91	25765/444624.5	0.000228497	0.00040463	15	ii
GO:0032970	regulation of actin filament-based process	87/378	25765/444624.5	0	0	87	ii
	new pathways that are not present in controls but present in advanced stages (3 and 4)
GO:0048736	appendage development	4/153	1308/178204.5	0.0268824	0.152741	4	iii
GO:0035107	appendage morphogenesis	4/136	1308/178204.5	0.018384	0.1149	4	iii
GO:0051216	cartilage development	7/91	1308/178204.5	5.34841e-06	6.07774e-05	7	iii
GO:0060573	cell fate specification involved in pattern specification	1/6	1308/178204.5	0.0432395	0.200183	1	iii
GO:0061448	connective tissue development	10/120	1308/178204.5	2.45603e-08	3.07004e-07	10	iii
GO:0048706	embryonic skeletal system development	3/105	1308/178204.5	0.0426278	0.200183	3	iii
GO:0007492	endoderm development	4/91	1308/178204.5	0.00465875	0.0342555	4	iii
GO:0001706	endoderm formation	4/55	1308/178204.5	0.000731738	0.00653337	4	iii
GO:0022617	extracellular matrix disassembly	3/91	1308/178204.5	0.0297558	0.154978	3	iii
GO:0001704	formation of primary germ layer	4/78	1308/178204.5	0.00267946	0.0223288	4	iii
GO:0007369	gastrulation	4/105	1308/178204.5	0.00769007	0.0534032	4	iii
GO:0060173	limb development	4/153	1308/178204.5	0.0268824	0.152741	4	iii
GO:0035108	limb morphogenesis	4/136	1308/178204.5	0.018384	0.1149	4	iii
GO:0001503	ossification	8/171	1308/178204.5	4.416e-05	0.00046	8	iii
GO:0001501	skeletal system development	24/820	1308/178204.5	1.92146e-08	2.66869e-07	24	iii
GO:0048705	skeletal system morphogenesis	6/190	1308/178204.5	0.00297854	0.0232698	6	iii
GO:0021510	spinal cord development	3/91	1308/178204.5	0.0297558	0.154978	3	iii
GO:0021521	ventral spinal cord interneuron specification	1/6	1308/178204.5	0.0432395	0.200183	1	iii
GO:0007015	actin filament organization	135/465	16024/450300.5	0	0	135	iii
GO:0007512	adult heart development	3/10	16024/450300.5	0.00447863	0.00645568	3	iii
GO:0070509	calcium ion import	10/45	16024/450300.5	3.29821e-06	5.55489e-06	10	iii
GO:0055006	cardiac cell development	23/55	16024/450300.5	0	0	23	iii
GO:0042438	melanin biosynthetic process	6/15	16024/450300.5	7.68979e-06	1.23037e-05	6	iii
GO:0006582	melanin metabolic process	6/15	16024/450300.5	7.68979e-06	1.23037e-05	6	iii
GO:1901021	positive regulation of calcium ion transmembrane transporter activity	6/21	16024/450300.5	6.93377e-05	0.000106673	6	iii
GO:0032414	positive regulation of ion transmembrane transporter activity	10/55	16024/450300.5	2.18562e-05	3.46237e-05	10	iii
GO:0051261	protein depolymerization	21/66	16024/450300.5	7.10543e-15	1.67187e-14	21	iii
GO:0043462	regulation of ATPase activity	18/55	16024/450300.5	3.37286e-13	7.29266e-13	18	iii
GO:0043502	regulation of muscle adaptation	29/78	16024/450300.5	0	0	29	iii
GO:0002062	chondrocyte differentiation	3/45	542/318402	6.59957e-05	0.000364713	3	iv
GO:0048568	embryonic organ development	3/406	542/318402	0.0328362	0.127696	3	iv
GO:0001654	eye development	3/210	542/318402	0.00575071	0.024153	3	iv
GO:0090596	sensory organ morphogenesis	8/231	542/318402	8.54301e-09	4.98342e-08	8	iv
GO:0050953	sensory perception of light stimulus	3/120	542/318402	0.00118818	0.00567088	3	iv
GO:0034505	tooth mineralization	1/15	542/318402	0.0252323	0.1019	1	iv
GO:0007178	transmembrane receptor protein serine/threonine kinase signaling pathway	3/190	542/318402	0.00436031	0.0190763	3	iv
GO:0007601	visual perception	3/120	542/318402	0.00118818	0.00567088	3	iv
GO:0001508	action potential	13/91	15892/380192	0.0001067	0.000181067	13	iv
GO:0086010	membrane depolarization during action potential	9/28	15892/380192	1.29974e-06	2.32295e-06	9	iv
GO:1903115	regulation of actin filament-based movement	15/28	15892/380192	4.59632e-14	9.89977e-14	15	iv

## Sheet: KIRC_Stage
ID	Description	GPRatio	BgRatio	pvalue	p.adjust	GOcount	Stages
	new pathways that are not present in controls but present in earlier stages (1 and 2)
GO:0033344	cholesterol efflux	6/21	56850/616050	0.0099046	0.187362	6	i
GO:0034378	chylomicron assembly	3/6	56850/616050	0.012688	0.221552	3	i
GO:0016042	lipid catabolic process	27/210	56850/616050	0.0497334	0.395759	27	i
GO:0034377	plasma lipoprotein particle assembly	6/15	56850/616050	0.00148056	0.0336088	6	i
GO:0071827	plasma lipoprotein particle organization	6/28	56850/616050	0.0394903	0.395759	6	i
GO:0065005	protein-lipid complex assembly	6/15	56850/616050	0.00148056	0.0336088	6	i
GO:0071825	protein-lipid complex subunit organization	6/28	56850/616050	0.0394903	0.395759	6	i
GO:0070231	T cell apoptotic process	6/21	56850/616050	0.0099046	0.187362	6	i
GO:0034370	triglyceride-rich lipoprotein particle remodeling	6/10	56850/616050	9.33413e-05	0.00706282	6	i
GO:0015701	bicarbonate transport	3/21	920/176418	0.00017527	0.00284188	3	i
GO:0043583	ear development	3/105	920/176418	0.017886	0.130972	3	i
GO:0042471	ear morphogenesis	3/55	920/176418	0.00303096	0.0275211	3	i
GO:0002064	epithelial cell development	4/105	920/176418	0.00231536	0.0275211	4	i
GO:0072015	glomerular visceral epithelial cell development	1/6	920/176418	0.0308847	0.212449	1	i
GO:0048839	inner ear development	3/91	920/176418	0.0122258	0.0925083	3	i
GO:0042472	inner ear morphogenesis	3/55	920/176418	0.00303096	0.0275211	3	i
GO:0044070	regulation of anion transport	3/45	920/176418	0.00170388	0.0241738	3	i
GO:0030856	regulation of epithelial cell differentiation	2/66	920/176418	0.046794	0.312418	2	i
GO:0007530	sex determination	2/15	920/176418	0.00272672	0.0275211	2	i
GO:0071216	cellular response to biotic stimulus	17/171	62299/978600.5	0.0460926	0.0754552	17	ii
GO:0071222	cellular response to lipopolysaccharide	16/153	62299/978600.5	0.0351679	0.0584369	16	ii
GO:0071219	cellular response to molecule of bacterial origin	17/171	62299/978600.5	0.0460926	0.0754552	17	ii
GO:0030101	natural killer cell activation	11/78	62299/978600.5	0.0103475	0.0180062	11	ii
GO:0031349	positive regulation of defense response	76/630	62299/978600.5	9.46649e-08	2.78946e-07	76	ii
GO:0045089	positive regulation of innate immune response	66/435	62299/978600.5	7.19125e-11	2.33716e-10	66	ii
GO:0043368	positive T cell selection	6/21	62299/978600.5	0.00156846	0.00284122	6	ii
GO:0045088	regulation of innate immune response	98/630	62299/978600.5	4.44089e-16	1.66345e-15	98	ii
GO:0034341	response to interferon-gamma	17/153	62299/978600.5	0.0181882	0.0311596	17	ii
GO:0002286	T cell activation involved in immune response	20/66	62299/978600.5	2.76001e-09	8.59102e-09	20	ii
	new pathways that are not present in controls but present in advanced stages (3 and 4)
GO:0002287	alpha-beta T cell activation involved in immune response	11/45	8426/671640.5	8.25429e-12	2.36097e-11	11	iii
GO:0002293	alpha-beta T cell differentiation involved in immune response	11/45	8426/671640.5	8.25429e-12	2.36097e-11	11	iii
GO:0046633	alpha-beta T cell proliferation	4/21	8426/671640.5	0.000124886	0.000236978	4	iii
GO:0097553	calcium ion transmembrane import into cytosol	15/91	8426/671640.5	6.63469e-13	2.00069e-12	15	iii
GO:0002294	CD4-positive, alpha-beta T cell differentiation involved in immune response	7/36	8426/671640.5	2.96027e-07	6.54287e-07	7	iii
GO:0071216	cellular response to biotic stimulus	17/171	8426/671640.5	8.4496e-11	2.28256e-10	17	iii
GO:0071346	cellular response to interferon-gamma	21/153	8426/671640.5	8.88178e-16	3.05753e-15	21	iii
GO:0071222	cellular response to lipopolysaccharide	12/136	8426/671640.5	1.81988e-07	4.06858e-07	12	iii
GO:0071219	cellular response to molecule of bacterial origin	17/171	8426/671640.5	8.4496e-11	2.28256e-10	17	iii
GO:0071356	cellular response to tumor necrosis factor	21/253	8426/671640.5	1.72498e-11	4.89792e-11	21	iii
GO:0002544	chronic inflammatory response	3/15	8426/671640.5	0.000802111	0.00139295	3	iii
GO:0002367	cytokine production involved in immune response	8/55	8426/671640.5	4.4057e-07	9.55587e-07	8	iii
GO:0007157	heterophilic cell-cell adhesion via plasma membrane cell adhesion molecules	6/36	8426/671640.5	5.48775e-06	1.1355e-05	6	iii
GO:0048872	homeostasis of number of cells	20/210	8426/671640.5	4.22373e-12	1.26387e-11	20	iii
GO:0048873	homeostasis of number of cells within a tissue	3/21	8426/671640.5	0.00221656	0.00371656	3	iii
GO:0006925	inflammatory cell apoptotic process	5/15	8426/671640.5	8.39295e-07	1.79388e-06	5	iii
GO:0050702	interleukin-1 beta secretion	5/36	8426/671640.5	8.46234e-05	0.000162963	5	iii
GO:0032612	interleukin-1 production	5/55	8426/671640.5	0.000641218	0.00112358	5	iii
GO:0050701	interleukin-1 secretion	5/45	8426/671640.5	0.00024977	0.000451909	5	iii
GO:0032623	interleukin-2 production	5/36	8426/671640.5	8.46234e-05	0.000162963	5	iii
GO:0001776	leukocyte homeostasis	8/78	8426/671640.5	6.5714e-06	1.34541e-05	8	iii
GO:0002260	lymphocyte homeostasis	3/55	8426/671640.5	0.0319403	0.0479721	3	iii
GO:0033028	myeloid cell apoptotic process	2/21	8426/671640.5	0.0282173	0.0425447	2	iii
GO:0002573	myeloid leukocyte differentiation	12/153	8426/671640.5	6.51031e-07	1.39918e-06	12	iii
GO:0030101	natural killer cell activation	11/78	8426/671640.5	4.32742e-09	1.0931e-08	11	iii
GO:0035747	natural killer cell chemotaxis	3/10	8426/671640.5	0.000221721	0.000404927	3	iii
GO:0001818	negative regulation of cytokine production	17/231	8426/671640.5	8.60406e-09	2.11834e-08	17	iii
GO:2000352	negative regulation of endothelial cell apoptotic process	3/21	8426/671640.5	0.00221656	0.00371656	3	iii
GO:0002701	negative regulation of production of molecular mediator of immune response	2/21	8426/671640.5	0.0282173	0.0425447	2	iii
GO:0051283	negative regulation of sequestering of calcium ion	15/91	8426/671640.5	6.63469e-13	2.00069e-12	15	iii
GO:0042119	neutrophil activation	51/741	8426/671640.5	0	0	51	iii
GO:0002283	neutrophil activation involved in immune response	48/703	8426/671640.5	0	0	48	iii
GO:0043312	neutrophil degranulation	48/703	8426/671640.5	0	0	48	iii
GO:0002446	neutrophil mediated immunity	49/820	8426/671640.5	0	0	49	iii
GO:0050918	positive chemotaxis	4/45	8426/671640.5	0.00244816	0.00405249	4	iii
GO:0046638	positive regulation of alpha-beta T cell differentiation	4/28	8426/671640.5	0.00039837	0.000704391	4	iii
GO:0002714	positive regulation of B cell mediated immunity	3/28	8426/671640.5	0.00511486	0.00808813	3	iii
GO:2000516	positive regulation of CD4-positive, alpha-beta T cell activation	5/21	8426/671640.5	5.34118e-06	1.11705e-05	5	iii
GO:0050921	positive regulation of chemotaxis	8/136	8426/671640.5	0.000347802	0.000623479	8	iii
GO:0050715	positive regulation of cytokine secretion	8/91	8426/671640.5	2.0625e-05	4.15689e-05	8	iii
GO:0031349	positive regulation of defense response	75/741	8426/671640.5	0	0	75	iii
GO:0070374	positive regulation of ERK1 and ERK2 cascade	10/190	8426/671640.5	0.000165393	0.000309317	10	iii
GO:0045921	positive regulation of exocytosis	4/55	8426/671640.5	0.00507681	0.00808813	4	iii
GO:1903708	positive regulation of hemopoiesis	15/136	8426/671640.5	2.46474e-10	6.4348e-10	15	iii
GO:0002891	positive regulation of immunoglobulin mediated immune response	3/28	8426/671640.5	0.00511486	0.00808813	3	iii
GO:0045089	positive regulation of innate immune response	51/496	8426/671640.5	0	0	51	iii
GO:0032731	positive regulation of interleukin-1 beta production	2/28	8426/671640.5	0.0479585	0.0703994	2	iii
GO:0050718	positive regulation of interleukin-1 beta secretion	2/28	8426/671640.5	0.0479585	0.0703994	2	iii
GO:0002690	positive regulation of leukocyte chemotaxis	8/120	8426/671640.5	0.000148065	0.000278248	8	iii
GO:0002687	positive regulation of leukocyte migration	8/171	8426/671640.5	0.00154734	0.00265161	8	iii
GO:2000403	positive regulation of lymphocyte migration	4/36	8426/671640.5	0.00105829	0.00182157	4	iii
GO:0002793	positive regulation of peptide secretion	11/276	8426/671640.5	0.000848234	0.0014665	11	iii
GO:0050714	positive regulation of protein secretion	11/210	8426/671640.5	8.2904e-05	0.000162877	11	iii
GO:0051047	positive regulation of secretion	16/630	8426/671640.5	0.00700486	0.0109433	16	iii
GO:1903532	positive regulation of secretion by cell	16/630	8426/671640.5	0.00700486	0.0109433	16	iii
GO:0010820	positive regulation of T cell chemotaxis	2/10	8426/671640.5	0.00662316	0.0104308	2	iii
GO:2000406	positive regulation of T cell migration	2/28	8426/671640.5	0.0479585	0.0703994	2	iii
GO:0045907	positive regulation of vasoconstriction	3/21	8426/671640.5	0.00221656	0.00371656	3	iii
GO:0043368	positive T cell selection	11/21	8426/671640.5	4.44089e-16	1.55631e-15	11	iii
GO:0002532	production of molecular mediator involved in inflammatory response	10/36	8426/671640.5	1.81339e-11	5.07489e-11	10	iii
GO:0050854	regulation of antigen receptor-mediated signaling pathway	5/36	8426/671640.5	8.46234e-05	0.000162963	5	iii
GO:0002712	regulation of B cell mediated immunity	3/36	8426/671640.5	0.0103506	0.0157897	3	iii
GO:0030888	regulation of B cell proliferation	3/36	8426/671640.5	0.0103506	0.0157897	3	iii
GO:0043949	regulation of cAMP-mediated signaling	3/21	8426/671640.5	0.00221656	0.00371656	3	iii
GO:0050920	regulation of chemotaxis	8/190	8426/671640.5	0.00297257	0.0048997	8	iii
GO:2000351	regulation of endothelial cell apoptotic process	3/28	8426/671640.5	0.00511486	0.00808813	3	iii
GO:0017157	regulation of exocytosis	6/136	8426/671640.5	0.0076778	0.0119467	6	iii
GO:1903706	regulation of hemopoiesis	57/703	8426/671640.5	0	0	57	iii
GO:0002889	regulation of immunoglobulin mediated immune response	3/36	8426/671640.5	0.0103506	0.0157897	3	iii
GO:0045088	regulation of innate immune response	74/741	8426/671640.5	0	0	74	iii
GO:0050706	regulation of interleukin-1 beta secretion	2/28	8426/671640.5	0.0479585	0.0703994	2	iii
GO:0002688	regulation of leukocyte chemotaxis	8/136	8426/671640.5	0.000347802	0.000623479	8	iii
GO:0043300	regulation of leukocyte degranulation	3/28	8426/671640.5	0.00511486	0.00808813	3	iii
GO:1901623	regulation of lymphocyte chemotaxis	4/28	8426/671640.5	0.00039837	0.000704391	4	iii
GO:2000401	regulation of lymphocyte migration	4/55	8426/671640.5	0.00507681	0.00808813	4	iii
GO:0002886	regulation of myeloid leukocyte mediated immunity	3/36	8426/671640.5	0.0103506	0.0157897	3	iii
GO:0051282	regulation of sequestering of calcium ion	15/91	8426/671640.5	6.63469e-13	2.00069e-12	15	iii
GO:0070232	regulation of T cell apoptotic process	3/28	8426/671640.5	0.00511486	0.00808813	3	iii
GO:0010819	regulation of T cell chemotaxis	2/15	8426/671640.5	0.0148253	0.0225275	2	iii
GO:0050856	regulation of T cell receptor signaling pathway	3/28	8426/671640.5	0.00511486	0.00808813	3	iii
GO:0019229	regulation of vasoconstriction	3/36	8426/671640.5	0.0103506	0.0157897	3	iii
GO:0060627	regulation of vesicle-mediated transport	18/666	8426/671640.5	0.00233746	0.00390246	18	iii
GO:0051209	release of sequestered calcium ion into cytosol	15/91	8426/671640.5	6.63469e-13	2.00069e-12	15	iii
GO:0034341	response to interferon-gamma	21/190	8426/671640.5	6.68354e-14	2.13106e-13	21	iii
GO:0051208	sequestering of calcium ion	15/91	8426/671640.5	6.63469e-13	2.00069e-12	15	iii
GO:0002286	T cell activation involved in immune response	22/105	8426/671640.5	0	0	22	iii
GO:0070231	T cell apoptotic process	6/36	8426/671640.5	5.48775e-06	1.1355e-05	6	iii
GO:0002292	T cell differentiation involved in immune response	13/55	8426/671640.5	1.67866e-13	5.30892e-13	13	iii
GO:0043029	T cell homeostasis	3/28	8426/671640.5	0.00511486	0.00808813	3	iii
GO:0002456	T cell mediated immunity	9/55	8426/671640.5	2.89645e-08	6.91239e-08	9	iii
GO:0050852	T cell receptor signaling pathway	35/171	8426/671640.5	0	0	35	iii
GO:0045058	T cell selection	16/28	8426/671640.5	0	0	16	iii
GO:0002295	T-helper cell lineage commitment	3/10	8426/671640.5	0.000221721	0.000404927	3	iii
GO:0046717	acid secretion	6/78	2306/273060.5	5.50978e-05	0.000674948	6	iii
GO:1902600	hydrogen ion transmembrane transport	14/66	2306/273060.5	4.44089e-16	1.08802e-14	14	iii
GO:0006818	hydrogen transport	15/120	2306/273060.5	1.56541e-13	2.30116e-12	15	iii
GO:0090383	phagosome acidification	9/15	2306/273060.5	1.11022e-15	2.33147e-14	9	iii
GO:0090382	phagosome maturation	9/21	2306/273060.5	5.77316e-14	1.06082e-12	9	iii
GO:0015992	proton transport	15/120	2306/273060.5	1.56541e-13	2.30116e-12	15	iii
GO:0002218	activation of innate immune response	20/378	18161/877812.5	0.000155677	0.000262066	20	iv
GO:0002363	alpha-beta T cell lineage commitment	6/15	18161/877812.5	3.33944e-07	6.70965e-07	6	iv
GO:0019882	antigen processing and presentation	37/253	18161/877812.5	0	0	37	iv
GO:0070588	calcium ion transmembrane transport	15/406	18161/877812.5	0.02377	0.0342037	15	iv
GO:0043369	CD4-positive or CD8-positive, alpha-beta T cell lineage commitment	6/15	18161/877812.5	3.33944e-07	6.70965e-07	6	iv
GO:0043373	CD4-positive, alpha-beta T cell lineage commitment	6/15	18161/877812.5	3.33944e-07	6.70965e-07	6	iv
GO:0007059	chromosome segregation	392/630	18161/877812.5	0	0	392	iv
GO:0051304	chromosome separation	46/78	18161/877812.5	0	0	46	iv
GO:0030574	collagen catabolic process	4/66	18161/877812.5	0.0480476	0.066929	4	iv
GO:0042107	cytokine metabolic process	10/91	18161/877812.5	2.00149e-05	3.62096e-05	10	iv
GO:0002534	cytokine production involved in inflammatory response	4/28	18161/877812.5	0.00252095	0.00392548	4	iv
GO:0060401	cytosolic calcium ion transport	15/171	18161/877812.5	3.31497e-06	6.28404e-06	15	iv
GO:0072577	endothelial cell apoptotic process	3/36	18161/877812.5	0.0380787	0.0535559	3	iv
GO:0034113	heterotypic cell-cell adhesion	4/36	18161/877812.5	0.00636356	0.00946932	4	iv
GO:0032611	interleukin-1 beta production	9/78	18161/877812.5	3.48903e-05	6.20906e-05	9	iv
GO:0032615	interleukin-12 production	6/36	18161/877812.5	8.95148e-05	0.000153655	6	iv
GO:0042094	interleukin-2 biosynthetic process	3/15	18161/877812.5	0.00334309	0.00513234	3	iv
GO:0044784	metaphase/anaphase transition of cell cycle	23/36	18161/877812.5	0	0	23	iv
GO:0007091	metaphase/anaphase transition of mitotic cell cycle	23/36	18161/877812.5	0	0	23	iv
GO:0140014	mitotic nuclear division	299/378	18161/877812.5	0	0	299	iv
GO:0000070	mitotic sister chromatid segregation	146/190	18161/877812.5	0	0	146	iv
GO:0051306	mitotic sister chromatid separation	31/45	18161/877812.5	0	0	31	iv
GO:0090307	mitotic spindle assembly	36/45	18161/877812.5	0	0	36	iv
GO:0002548	monocyte chemotaxis	7/55	18161/877812.5	0.00013775	0.000232787	7	iv
GO:0051782	negative regulation of cell division	3/15	18161/877812.5	0.00334309	0.00513234	3	iv
GO:1904036	negative regulation of epithelial cell apoptotic process	3/28	18161/877812.5	0.0197213	0.0285664	3	iv
GO:0032845	negative regulation of homeostatic process	18/210	18161/877812.5	5.11148e-07	1.01763e-06	18	iv
GO:0002698	negative regulation of immune effector process	10/105	18161/877812.5	6.91695e-05	0.000120151	10	iv
GO:0050777	negative regulation of immune response	14/171	18161/877812.5	1.52766e-05	2.82228e-05	14	iv
GO:0098813	nuclear chromosome segregation	312/496	18161/877812.5	0	0	312	iv
GO:0000280	nuclear division	371/595	18161/877812.5	0	0	371	iv
GO:0030890	positive regulation of B cell proliferation	4/28	18161/877812.5	0.00252095	0.00392548	4	iv
GO:0043372	positive regulation of CD4-positive, alpha-beta T cell differentiation	8/21	18161/877812.5	5.36031e-09	1.17442e-08	8	iv
GO:0002639	positive regulation of immunoglobulin production	3/28	18161/877812.5	0.0197213	0.0285664	3	iv
GO:0032732	positive regulation of interleukin-1 production	5/78	18161/877812.5	0.0230481	0.0332748	5	iv
GO:0050716	positive regulation of interleukin-1 secretion	5/55	18161/877812.5	0.00558823	0.00848944	5	iv
GO:0032760	positive regulation of tumor necrosis factor production	6/55	18161/877812.5	0.000953514	0.00154547	6	iv
GO:1903557	positive regulation of tumor necrosis factor superfamily cytokine production	6/66	18161/877812.5	0.00246554	0.003909	6	iv
GO:0051983	regulation of chromosome segregation	60/78	18161/877812.5	0	0	60	iv
GO:1905818	regulation of chromosome separation	31/45	18161/877812.5	0	0	31	iv
GO:0042035	regulation of cytokine biosynthetic process	10/78	18161/877812.5	4.99895e-06	9.43526e-06	10	iv
GO:0051101	regulation of DNA binding	12/120	18161/877812.5	8.17648e-06	1.53002e-05	12	iv
GO:0032651	regulation of interleukin-1 beta production	5/66	18161/877812.5	0.0119265	0.0175674	5	iv
GO:0032652	regulation of interleukin-1 production	5/91	18161/877812.5	0.0409207	0.0571841	5	iv
GO:0050704	regulation of interleukin-1 secretion	5/66	18161/877812.5	0.0119265	0.0175674	5	iv
GO:0032655	regulation of interleukin-12 production	6/36	18161/877812.5	8.95148e-05	0.000153655	6	iv
GO:0045076	regulation of interleukin-2 biosynthetic process	3/15	18161/877812.5	0.00334309	0.00513234	3	iv
GO:0032663	regulation of interleukin-2 production	9/45	18161/877812.5	3.1305e-07	6.46872e-07	9	iv
GO:1902099	regulation of metaphase/anaphase transition of cell cycle	23/36	18161/877812.5	0	0	23	iv
GO:0030071	regulation of mitotic metaphase/anaphase transition	23/36	18161/877812.5	0	0	23	iv
GO:0033047	regulation of mitotic sister chromatid segregation	31/45	18161/877812.5	0	0	31	iv
GO:0010965	regulation of mitotic sister chromatid separation	31/45	18161/877812.5	0	0	31	iv
GO:0050764	regulation of phagocytosis	6/66	18161/877812.5	0.00246554	0.003909	6	iv
GO:0045589	regulation of regulatory T cell differentiation	4/28	18161/877812.5	0.00252095	0.00392548	4	iv
GO:0045066	regulatory T cell differentiation	4/36	18161/877812.5	0.00636356	0.00946932	4	iv
GO:0034612	response to tumor necrosis factor	23/378	18161/877812.5	5.868e-06	1.10278e-05	23	iv
GO:0000819	sister chromatid segregation	291/378	18161/877812.5	0	0	291	iv
GO:0042088	T-helper 1 type immune response	3/28	18161/877812.5	0.0197213	0.0285664	3	iv
GO:0072539	T-helper 17 cell differentiation	6/15	18161/877812.5	3.33944e-07	6.70965e-07	6	iv
GO:0019730	antimicrobial humoral response	7/66	5343/264264.5	0.000377747	0.00253313	7	iv
GO:0015701	bicarbonate transport	6/28	5343/264264.5	1.75038e-05	0.000133029	6	iv
GO:0072044	collecting duct development	2/10	5343/264264.5	0.0165111	0.0672239	2	iv
GO:0007618	mating	4/28	5343/264264.5	0.0023188	0.0120156	4	iv
GO:0045745	positive regulation of G-protein coupled receptor protein signaling pathway	3/15	5343/264264.5	0.0031324	0.0155258	3	iv

## Sheet: KIRP_Stage
ID	Description	GPRatio	BgRatio	pvalue	p.adjust	GOcount	Stages
	new pathways that are not present in controls but present in earlier stages (1 and 2)
GO:0006953	acute-phase response	4/91	1113/204800	0.00159413	0.00637653	4	i
GO:0031532	actin cytoskeleton reorganization	3/45	2564/270112.5	0.00900998	0.101852	3	i
GO:0031032	actomyosin structure organization	8/105	2564/270112.5	8.04628e-06	0.000836813	8	i
GO:0001525	angiogenesis	42/595	2564/270112.5	0	0	42	i
GO:0048483	autonomic nervous system development	2/28	2564/270112.5	0.0289175	0.24651	2	i
GO:0015701	bicarbonate transport	2/21	2564/270112.5	0.0167815	0.158661	2	i
GO:0010927	cellular component assembly involved in morphogenesis	5/66	2564/270112.5	0.000424475	0.0183939	5	i
GO:0042471	ear morphogenesis	5/105	2564/270112.5	0.00338684	0.0587188	5	i
GO:0048568	embryonic organ development	13/528	2564/270112.5	0.0019234	0.0454621	13	i
GO:0048562	embryonic organ morphogenesis	11/276	2564/270112.5	8.13013e-05	0.00469741	11	i
GO:0003158	endothelium development	5/78	2564/270112.5	0.000913101	0.0296758	5	i
GO:0050673	epithelial cell proliferation	8/351	2564/270112.5	0.0201491	0.187099	8	i
GO:0072012	glomerulus vasculature development	2/21	2564/270112.5	0.0167815	0.158661	2	i
GO:0009755	hormone-mediated signaling pathway	5/190	2564/270112.5	0.0358482	0.29589	5	i
GO:0042472	inner ear morphogenesis	5/105	2564/270112.5	0.00338684	0.0587188	5	i
GO:0048017	inositol lipid-mediated signaling	4/120	2564/270112.5	0.0279942	0.242616	4	i
GO:0061440	kidney vasculature development	2/21	2564/270112.5	0.0167815	0.158661	2	i
GO:0042692	muscle cell differentiation	9/300	2564/270112.5	0.00254978	0.0509956	9	i
GO:0003012	muscle system process	19/741	2564/270112.5	0.000122229	0.00635591	19	i
GO:0030239	myofibril assembly	3/36	2564/270112.5	0.00482867	0.0738503	3	i
GO:0032102	negative regulation of response to external stimulus	7/210	2564/270112.5	0.00421342	0.0663933	7	i
GO:0014065	phosphatidylinositol 3-kinase signaling	4/91	2564/270112.5	0.0112709	0.122101	4	i
GO:0048015	phosphatidylinositol-mediated signaling	4/120	2564/270112.5	0.0279942	0.242616	4	i
GO:0014068	positive regulation of phosphatidylinositol 3-kinase signaling	2/36	2564/270112.5	0.0458666	0.361373	2	i
GO:1904018	positive regulation of vasculature development	10/91	2564/270112.5	1.86784e-08	2.42819e-06	10	i
GO:0006813	potassium ion transport	9/435	2564/270112.5	0.0247387	0.225687	9	i
GO:0032970	regulation of actin filament-based process	10/351	2564/270112.5	0.00219913	0.0476478	10	i
GO:0050730	regulation of peptidyl-tyrosine phosphorylation	4/136	2564/270112.5	0.0413523	0.330818	4	i
GO:0043114	regulation of vascular permeability	3/28	2564/270112.5	0.00234382	0.0487514	3	i
GO:0061041	regulation of wound healing	4/78	2564/270112.5	0.00662324	0.0765353	4	i
GO:0061437	renal system vasculature development	2/21	2564/270112.5	0.0167815	0.158661	2	i
GO:0046683	response to organophosphorus	3/78	2564/270112.5	0.03843	0.312244	3	i
GO:0006939	smooth muscle contraction	4/120	2564/270112.5	0.0279942	0.242616	4	i
GO:0014706	striated muscle tissue development	8/276	2564/270112.5	0.00529431	0.0764733	8	i
GO:0002460	adaptive immune response based on somatic recombination of immune receptors built from immunoglobulin superfamily domains	85/300	14452/245000	0	0	85	ii
GO:0031570	DNA integrity checkpoint	37/120	14452/245000	0	0	37	ii
GO:0002768	immune response-regulating cell surface receptor signaling pathway	140/406	14452/245000	0	0	140	ii
GO:0030595	leukocyte chemotaxis	39/153	14452/245000	5.10703e-15	1.03328e-14	39	ii
GO:0002449	lymphocyte mediated immunity	84/300	14452/245000	0	0	84	ii
GO:0010324	membrane invagination	28/91	14452/245000	2.10165e-13	3.89029e-13	28	ii
GO:0007093	mitotic cell cycle checkpoint	34/105	14452/245000	1.11022e-16	2.54183e-16	34	ii
GO:0050866	negative regulation of cell activation	17/105	14452/245000	0.000140056	0.000203082	17	ii
GO:0051782	negative regulation of cell division	8/15	14452/245000	6.46486e-07	1.02262e-06	8	ii
GO:0002683	negative regulation of immune system process	87/325	14452/245000	0	0	87	ii
GO:0050672	negative regulation of lymphocyte proliferation	6/36	14452/245000	0.0177894	0.0234497	6	ii
GO:0033004	negative regulation of mast cell activation	5/15	14452/245000	0.00129949	0.00185338	5	ii
GO:0032945	negative regulation of mononuclear cell proliferation	6/36	14452/245000	0.0177894	0.0234497	6	ii
GO:0002283	neutrophil activation involved in immune response	227/741	14452/245000	0	0	227	ii
GO:0043312	neutrophil degranulation	207/703	14452/245000	0	0	207	ii
GO:0006909	phagocytosis	107/351	14452/245000	0	0	107	ii
GO:0017157	regulation of exocytosis	21/105	14452/245000	7.70048e-07	1.19632e-06	21	ii
GO:0002697	regulation of immune effector process	115/351	14452/245000	0	0	115	ii
GO:0043300	regulation of leukocyte degranulation	19/28	14452/245000	0	0	19	ii
GO:1902563	regulation of neutrophil activation	6/10	14452/245000	7.18497e-06	1.05948e-05	6	ii
GO:0002224	toll-like receptor signaling pathway	28/78	14452/245000	2.44249e-15	5.05944e-15	28	ii
GO:0001667	ameboidal-type cell migration	32/325	13173/307328	1.36725e-05	0.00017945	32	ii
GO:0015837	amine transport	8/78	13173/307328	0.0185925	0.0802412	8	ii
GO:0001658	branching involved in ureteric bud morphogenesis	5/45	13173/307328	0.0426565	0.14948	5	ii
GO:0048754	branching morphogenesis of an epithelial tube	20/105	13173/307328	2.01499e-08	5.90105e-07	20	ii
GO:0055074	calcium ion homeostasis	47/780	13173/307328	0.0134114	0.0646905	47	ii
GO:0097553	calcium ion transmembrane import into cytosol	9/105	13173/307328	0.036752	0.139521	9	ii
GO:0043010	camera-type eye development	24/253	13173/307328	0.000265854	0.00227084	24	ii
GO:0051937	catecholamine transport	6/45	13173/307328	0.0120171	0.0593616	6	ii
GO:0010644	cell communication by electrical coupling	3/15	13173/307328	0.0243259	0.0997361	3	ii
GO:0072202	cell differentiation involved in metanephros development	3/15	13173/307328	0.0243259	0.0997361	3	ii
GO:0006874	cellular calcium ion homeostasis	39/666	13173/307328	0.0327958	0.126852	39	ii
GO:0072503	cellular divalent inorganic cation homeostasis	39/666	13173/307328	0.0327958	0.126852	39	ii
GO:0071804	cellular potassium ion transport	20/276	13173/307328	0.0164141	0.0739537	20	ii
GO:0021953	central nervous system neuron differentiation	12/120	13173/307328	0.00555098	0.0329841	12	ii
GO:0048565	digestive tract development	13/78	13173/307328	2.63812e-05	0.000300452	13	ii
GO:0072507	divalent inorganic cation homeostasis	47/780	13173/307328	0.0134114	0.0646905	47	ii
GO:0010631	epithelial cell migration	24/210	13173/307328	1.40058e-05	0.00017945	24	ii
GO:0072175	epithelial tube formation	14/78	13173/307328	5.37288e-06	7.34293e-05	14	ii
GO:0090132	epithelium migration	27/231	13173/307328	2.76534e-06	3.90961e-05	27	ii
GO:0001654	eye development	34/378	13173/307328	4.84414e-05	0.000536783	34	ii
GO:0045444	fat cell differentiation	29/171	13173/307328	2.75288e-10	1.12868e-08	29	ii
GO:0048286	lung alveolus development	8/21	13173/307328	1.39898e-06	2.12438e-05	8	ii
GO:0030539	male genitalia development	3/15	13173/307328	0.0243259	0.0997361	3	ii
GO:0072163	mesonephric epithelium development	9/78	13173/307328	0.00615627	0.0332115	9	ii
GO:0072164	mesonephric tubule development	9/78	13173/307328	0.00615627	0.0332115	9	ii
GO:0072171	mesonephric tubule morphogenesis	5/45	13173/307328	0.0426565	0.14948	5	ii
GO:0072224	metanephric glomerulus development	4/28	13173/307328	0.0303684	0.119722	4	ii
GO:0003338	metanephros morphogenesis	6/28	13173/307328	0.00103218	0.00769444	6	ii
GO:0015844	monoamine transport	6/55	13173/307328	0.0298737	0.119226	6	ii
GO:0061138	morphogenesis of a branching epithelium	37/171	13173/307328	3.33067e-16	2.27596e-14	37	ii
GO:0001763	morphogenesis of a branching structure	37/171	13173/307328	3.33067e-16	2.27596e-14	37	ii
GO:0072079	nephron tubule formation	3/10	13173/307328	0.00752834	0.039572	3	ii
GO:0007269	neurotransmitter secretion	9/78	13173/307328	0.00615627	0.0332115	9	ii
GO:0006836	neurotransmitter transport	17/210	13173/307328	0.00949248	0.0480484	17	ii
GO:0010634	positive regulation of epithelial cell migration	11/66	13173/307328	0.000108084	0.00103056	11	ii
GO:0050679	positive regulation of epithelial cell proliferation	23/153	13173/307328	1.81114e-07	3.9638e-06	23	ii
GO:0010838	positive regulation of keratinocyte proliferation	4/10	13173/307328	0.00057519	0.00444958	4	ii
GO:0045834	positive regulation of lipid metabolic process	10/91	13173/307328	0.00565695	0.0331335	10	ii
GO:0050731	positive regulation of peptidyl-tyrosine phosphorylation	13/153	13173/307328	0.0149057	0.0710619	13	ii
GO:0043552	positive regulation of phosphatidylinositol 3-kinase activity	4/15	13173/307328	0.00314713	0.0198511	4	ii
GO:1903727	positive regulation of phospholipid metabolic process	6/21	13173/307328	0.000192405	0.00167842	6	ii
GO:0051897	positive regulation of protein kinase B signaling	17/136	13173/307328	7.82779e-05	0.000822922	17	ii
GO:0048260	positive regulation of receptor-mediated endocytosis	7/28	13173/307328	0.000141615	0.00126222	7	ii
GO:0071805	potassium ion transmembrane transport	20/276	13173/307328	0.0164141	0.0739537	20	ii
GO:0099531	presynaptic process involved in chemical synaptic transmission	12/105	13173/307328	0.00184523	0.0132727	12	ii
GO:0043491	protein kinase B signaling	17/171	13173/307328	0.00116961	0.00856324	17	ii
GO:0090287	regulation of cellular response to growth factor stimulus	37/253	13173/307328	9.25185e-11	4.21473e-09	37	ii
GO:0010632	regulation of epithelial cell migration	21/136	13173/307328	3.84326e-07	7.16244e-06	21	ii
GO:0050678	regulation of epithelial cell proliferation	35/253	13173/307328	1.33279e-09	4.20342e-08	35	ii
GO:0010817	regulation of hormone levels	29/465	13173/307328	0.0299518	0.119226	29	ii
GO:2000021	regulation of ion homeostasis	21/210	13173/307328	0.000307798	0.00252394	21	ii
GO:0010959	regulation of metal ion transport	32/435	13173/307328	0.00243977	0.0158778	32	ii
GO:0072215	regulation of metanephros development	3/15	13173/307328	0.0243259	0.0997361	3	ii
GO:0043266	regulation of potassium ion transport	9/55	13173/307328	0.000516988	0.00415618	9	ii
GO:0051896	regulation of protein kinase B signaling	17/136	13173/307328	7.82779e-05	0.000822922	17	ii
GO:0048545	response to steroid hormone	37/465	13173/307328	0.000282525	0.00236398	37	ii
GO:0050953	sensory perception of light stimulus	15/190	13173/307328	0.0174577	0.0761455	15	ii
GO:0099643	signal release from synapse	9/78	13173/307328	0.00615627	0.0332115	9	ii
GO:0048705	skeletal system morphogenesis	26/190	13173/307328	2.03024e-07	3.9638e-06	26	ii
GO:0090130	tissue migration	27/231	13173/307328	2.76534e-06	3.90961e-05	27	ii
GO:0001657	ureteric bud development	9/78	13173/307328	0.00615627	0.0332115	9	ii
GO:0060675	ureteric bud morphogenesis	5/45	13173/307328	0.0426565	0.14948	5	ii
GO:0007601	visual perception	15/190	13173/307328	0.0174577	0.0761455	15	ii
	new pathways that are not present in controls but present in advanced stages (3 and 4)
GO:0048736	appendage development	5/136	5864/456012.5	0.0318168	0.0491347	5	iii
GO:0044843	cell cycle G1/S phase transition	52/276	5864/456012.5	0	0	52	iii
GO:0070268	cornification	13/190	5864/456012.5	1.39714e-06	2.66329e-06	13	iii
GO:0055123	digestive system development	6/105	5864/456012.5	0.00245798	0.00405235	6	iii
GO:0031570	DNA integrity checkpoint	49/190	5864/456012.5	0	0	49	iii
GO:0000076	DNA replication checkpoint	5/15	5864/456012.5	9.46722e-07	1.83333e-06	5	iii
GO:0006270	DNA replication initiation	12/28	5864/456012.5	4.44089e-16	1.02224e-15	12	iii
GO:0009913	epidermal cell differentiation	35/630	5864/456012.5	1.26144e-12	2.74813e-12	35	iii
GO:0008544	epidermis development	44/1081	5864/456012.5	5.95564e-11	1.27472e-10	44	iii
GO:0048732	gland development	17/465	5864/456012.5	0.000146747	0.000263282	17	iii
GO:0031424	keratinization	14/300	5864/456012.5	4.41089e-05	8.03176e-05	14	iii
GO:0030216	keratinocyte differentiation	27/561	5864/456012.5	9.21233e-09	1.87317e-08	27	iii
GO:0060173	limb development	5/136	5864/456012.5	0.0318168	0.0491347	5	iii
GO:0007093	mitotic cell cycle checkpoint	63/231	5864/456012.5	0	0	63	iii
GO:0044774	mitotic DNA integrity checkpoint	12/91	5864/456012.5	2.49502e-09	5.24814e-09	12	iii
GO:0090307	mitotic spindle assembly	36/45	5864/456012.5	0	0	36	iii
GO:1901988	negative regulation of cell cycle phase transition	49/231	5864/456012.5	0	0	49	iii
GO:0010948	negative regulation of cell cycle process	77/325	5864/456012.5	0	0	77	iii
GO:0051782	negative regulation of cell division	2/21	5864/456012.5	0.0295296	0.0467872	2	iii
GO:0045930	negative regulation of mitotic cell cycle	67/300	5864/456012.5	0	0	67	iii
GO:1901991	negative regulation of mitotic cell cycle phase transition	49/210	5864/456012.5	0	0	49	iii
GO:0006836	neurotransmitter transport	5/153	5864/456012.5	0.0485885	0.0731827	5	iii
GO:0090068	positive regulation of cell cycle process	61/276	5864/456012.5	0	0	61	iii
GO:0060525	prostate glandular acinus development	2/10	5864/456012.5	0.00694677	0.0113001	2	iii
GO:1901987	regulation of cell cycle phase transition	249/666	5864/456012.5	0	0	249	iii
GO:0051101	regulation of DNA binding	7/120	5864/456012.5	0.000974435	0.00165113	7	iii
GO:0052548	regulation of endopeptidase activity	25/465	5864/456012.5	3.64266e-09	7.53228e-09	25	iii
GO:1901990	regulation of mitotic cell cycle phase transition	249/630	5864/456012.5	0	0	249	iii
GO:0052547	regulation of peptidase activity	25/496	5864/456012.5	1.30334e-08	2.60668e-08	25	iii
GO:0023061	signal release	12/496	5864/456012.5	0.0290588	0.046647	12	iii
GO:0043588	skin development	27/820	5864/456012.5	1.3327e-05	2.46347e-05	27	iii
GO:0051225	spindle assembly	41/66	5864/456012.5	0	0	41	iii
GO:0007597	blood coagulation, intrinsic pathway	1/10	784/204800	0.0376293	0.799623	1	iii
GO:0072243	metanephric nephron epithelium development	1/10	784/204800	0.0376293	0.799623	1	iii
GO:0050731	positive regulation of peptidyl-tyrosine phosphorylation	2/91	784/204800	0.0479231	0.94467	2	iii
GO:0090287	regulation of cellular response to growth factor stimulus	3/190	784/204800	0.037165	0.799623	3	iii
GO:0050730	regulation of peptidyl-tyrosine phosphorylation	3/136	784/204800	0.0157323	0.486272	3	iii
GO:0061469	regulation of type B pancreatic cell proliferation	1/6	784/204800	0.0227503	0.644593	1	iii
GO:0044342	type B pancreatic cell proliferation	1/10	784/204800	0.0376293	0.799623	1	iii
GO:0051315	attachment of mitotic spindle microtubules to kinetochore	3/10	9068/215824.5	0.00712221	0.008606	3	iv
GO:0008608	attachment of spindle microtubules to kinetochore	8/21	9068/215824.5	1.20357e-06	1.66208e-06	8	iv
GO:0044839	cell cycle G2/M phase transition	101/190	9068/215824.5	0	0	101	iv
GO:0034508	centromere complex assembly	12/28	9068/215824.5	4.86489e-10	7.23496e-10	12	iv
GO:0030261	chromosome condensation	8/21	9068/215824.5	1.20357e-06	1.66208e-06	8	iv
GO:0050000	chromosome localization	36/55	9068/215824.5	0	0	36	iv
GO:0070192	chromosome organization involved in meiotic cell cycle	6/36	9068/215824.5	0.00361057	0.0044087	6	iv
GO:0030574	collagen catabolic process	6/45	9068/215824.5	0.010964	0.0128467	6	iv
GO:0000910	cytokinesis	43/78	9068/215824.5	0	0	43	iv
GO:0061640	cytoskeleton-dependent cytokinesis	23/36	9068/215824.5	0	0	23	iv
GO:0071103	DNA conformation change	68/190	9068/215824.5	0	0	68	iv
GO:0000077	DNA damage checkpoint	15/78	9068/215824.5	7.84886e-07	1.11033e-06	15	iv
GO:0006323	DNA packaging	39/120	9068/215824.5	0	0	39	iv
GO:0006260	DNA replication	84/210	9068/215824.5	0	0	84	iv
GO:0051303	establishment of chromosome localization	36/55	9068/215824.5	0	0	36	iv
GO:0000082	G1/S transition of mitotic cell cycle	52/153	9068/215824.5	0	0	52	iv
GO:0000086	G2/M transition of mitotic cell cycle	86/171	9068/215824.5	0	0	86	iv
GO:0035825	homologous recombination	10/28	9068/215824.5	1.11389e-07	1.5952e-07	10	iv
GO:0051383	kinetochore organization	6/15	9068/215824.5	1.97863e-05	2.66885e-05	6	iv
GO:0007127	meiosis I	19/66	9068/215824.5	1.76752e-11	2.66276e-11	19	iv
GO:0051310	metaphase plate congression	28/45	9068/215824.5	0	0	28	iv
GO:0000226	microtubule cytoskeleton organization	232/561	9068/215824.5	0	0	232	iv
GO:0007076	mitotic chromosome condensation	5/10	9068/215824.5	2.75933e-05	3.6791e-05	5	iv
GO:0000281	mitotic cytokinesis	19/28	9068/215824.5	0	0	19	iv
GO:0007080	mitotic metaphase plate congression	21/36	9068/215824.5	0	0	21	iv
GO:0007052	mitotic spindle organization	69/91	9068/215824.5	0	0	69	iv
GO:0044243	multicellular organismal catabolic process	6/45	9068/215824.5	0.010964	0.0128467	6	iv
GO:2001251	negative regulation of chromosome organization	28/78	9068/215824.5	0	0	28	iv
GO:0045787	positive regulation of cell cycle	69/300	9068/215824.5	0	0	69	iv
GO:0071158	positive regulation of cell cycle arrest	6/45	9068/215824.5	0.010964	0.0128467	6	iv
GO:1901989	positive regulation of cell cycle phase transition	21/45	9068/215824.5	0	0	21	iv
GO:0045931	positive regulation of mitotic cell cycle	28/78	9068/215824.5	0	0	28	iv
GO:1901992	positive regulation of mitotic cell cycle phase transition	16/36	9068/215824.5	3.04423e-13	5.04473e-13	16	iv
GO:0007131	reciprocal meiotic recombination	10/28	9068/215824.5	1.11389e-07	1.5952e-07	10	iv
GO:0071156	regulation of cell cycle arrest	9/55	9068/215824.5	0.000447312	0.000576535	9	iv
GO:0033044	regulation of chromosome organization	139/253	9068/215824.5	0	0	139	iv
GO:1904029	regulation of cyclin-dependent protein kinase activity	8/45	9068/215824.5	0.000517906	0.000653012	8	iv
GO:0000079	regulation of cyclin-dependent protein serine/threonine kinase activity	8/45	9068/215824.5	0.000517906	0.000653012	8	iv
GO:0007051	spindle organization	79/105	9068/215824.5	0	0	79	iv
GO:0099132	ATP hydrolysis coupled cation transmembrane transport	9/36	24119/264264.5	0.00421811	0.0255899	9	iv
GO:0099131	ATP hydrolysis coupled ion transmembrane transport	9/36	24119/264264.5	0.00421811	0.0255899	9	iv
GO:0015991	ATP hydrolysis coupled proton transport	5/15	24119/264264.5	0.00869861	0.0465632	5	iv
GO:0090662	ATP hydrolysis coupled transmembrane transport	9/45	24119/264264.5	0.0188769	0.0936983	9	iv
GO:0015701	bicarbonate transport	6/28	24119/264264.5	0.0376918	0.165965	6	iv
GO:0001658	branching involved in ureteric bud morphogenesis	6/28	24119/264264.5	0.0376918	0.165965	6	iv
GO:0046395	carboxylic acid catabolic process	43/253	24119/264264.5	5.54749e-05	0.000488537	43	iv
GO:0072202	cell differentiation involved in metanephros development	4/15	24119/264264.5	0.0417484	0.172687	4	iv
GO:0009063	cellular amino acid catabolic process	17/78	24119/264264.5	0.000575914	0.00383448	17	iv
GO:0071804	cellular potassium ion transport	25/171	24119/264264.5	0.0128295	0.0648603	25	iv
GO:1901653	cellular response to peptide	50/276	24119/264264.5	2.36659e-06	3.40041e-05	50	iv
GO:0071375	cellular response to peptide hormone stimulus	43/253	24119/264264.5	5.54749e-05	0.000488537	43	iv
GO:0015988	energy coupled proton transmembrane transport, against electrochemical gradient	5/15	24119/264264.5	0.00869861	0.0465632	5	iv
GO:1902600	hydrogen ion transmembrane transport	16/66	24119/264264.5	0.00023182	0.00175797	16	iv
GO:0006818	hydrogen transport	16/105	24119/264264.5	0.0288008	0.131043	16	iv
GO:0051452	intracellular pH reduction	9/28	24119/264264.5	0.000603965	0.00383448	9	iv
GO:0072207	metanephric epithelium development	6/21	24119/264264.5	0.00939607	0.0493294	6	iv
GO:0050804	modulation of chemical synaptic transmission	38/300	24119/264264.5	0.0251165	0.118221	38	iv
GO:0015844	monoamine transport	13/66	24119/264264.5	0.00613666	0.0356138	13	iv
GO:0061138	morphogenesis of a branching epithelium	22/105	24119/264264.5	0.000178535	0.00139257	22	iv
GO:0001763	morphogenesis of a branching structure	30/120	24119/264264.5	2.76652e-07	5.39472e-06	30	iv
GO:0045926	negative regulation of growth	24/153	24119/264264.5	0.00626177	0.0356138	24	iv
GO:0016054	organic acid catabolic process	43/253	24119/264264.5	5.54749e-05	0.000488537	43	iv
GO:0045851	pH reduction	9/28	24119/264264.5	0.000603965	0.00383448	9	iv
GO:0090383	phagosome acidification	9/15	24119/264264.5	1.3151e-06	2.1119e-05	9	iv
GO:0090382	phagosome maturation	9/21	24119/264264.5	4.63886e-05	0.000452289	9	iv
GO:0071805	potassium ion transmembrane transport	25/171	24119/264264.5	0.0128295	0.0648603	25	iv
GO:0006813	potassium ion transport	38/300	24119/264264.5	0.0251165	0.118221	38	iv
GO:0015992	proton transport	16/105	24119/264264.5	0.0288008	0.131043	16	iv
GO:0001505	regulation of neurotransmitter levels	21/153	24119/264264.5	0.0389795	0.166272	21	iv
GO:0050953	sensory perception of light stimulus	33/153	24119/264264.5	2.65052e-06	3.61795e-05	33	iv
GO:0044282	small molecule catabolic process	53/435	24119/264264.5	0.019551	0.095311	53	iv
GO:0007601	visual perception	32/136	24119/264264.5	4.96774e-07	9.04129e-06	32	iv

## Sheet: LUAD_Stage
ID	Description	GPRatio	BgRatio	pvalue	p.adjust	GOcount	Stages
	new pathways that are not present in controls but present in earlier stages (1 and 2)
GO:1904837	beta-catenin-TCF complex assembly	21/36	130324/2008008	2.22045e-16	1.20274e-15	21	i
GO:0098761	cellular response to interleukin-7	22/36	130324/2008008	0	0	22	i
GO:0061641	CENP-A containing chromatin organization	22/45	130324/2008008	6.99441e-15	3.32661e-14	22	i
GO:0034080	CENP-A containing nucleosome assembly	22/45	130324/2008008	6.99441e-15	3.32661e-14	22	i
GO:0034508	centromere complex assembly	24/55	130324/2008008	1.06581e-14	4.94842e-14	24	i
GO:0031497	chromatin assembly	325/561	130324/2008008	0	0	325	i
GO:0006333	chromatin assembly or disassembly	325/561	130324/2008008	0	0	325	i
GO:0031055	chromatin remodeling at centromere	22/45	130324/2008008	6.99441e-15	3.32661e-14	22	i
GO:0006342	chromatin silencing	206/378	130324/2008008	0	0	206	i
GO:0000183	chromatin silencing at rDNA	93/120	130324/2008008	0	0	93	i
GO:0006335	DNA replication-dependent nucleosome assembly	93/120	130324/2008008	0	0	93	i
GO:0034723	DNA replication-dependent nucleosome organization	93/120	130324/2008008	0	0	93	i
GO:0006336	DNA replication-independent nucleosome assembly	22/45	130324/2008008	6.99441e-15	3.32661e-14	22	i
GO:0034724	DNA replication-independent nucleosome organization	22/45	130324/2008008	6.99441e-15	3.32661e-14	22	i
GO:0060218	hematopoietic stem cell differentiation	93/120	130324/2008008	0	0	93	i
GO:0043486	histone exchange	22/66	130324/2008008	8.10265e-11	3.67446e-10	22	i
GO:0038111	interleukin-7-mediated signaling pathway	22/36	130324/2008008	0	0	22	i
GO:0030219	megakaryocyte differentiation	93/136	130324/2008008	0	0	93	i
GO:0002385	mucosal immune response	5/28	130324/2008008	0.0323178	0.136999	5	i
GO:0045814	negative regulation of gene expression, epigenetic	206/378	130324/2008008	0	0	206	i
GO:0045653	negative regulation of megakaryocyte differentiation	21/28	130324/2008008	0	0	21	i
GO:0006334	nucleosome assembly	325/496	130324/2008008	0	0	325	i
GO:0034728	nucleosome organization	325/561	130324/2008008	0	0	325	i
GO:0002251	organ or tissue specific immune response	5/28	130324/2008008	0.0323178	0.136999	5	i
GO:0045815	positive regulation of gene expression, epigenetic	93/136	130324/2008008	0	0	93	i
GO:0051290	protein heterotetramerization	93/136	130324/2008008	0	0	93	i
GO:0051262	protein tetramerization	93/153	130324/2008008	0	0	93	i
GO:0071824	protein-DNA complex subunit organization	334/703	130324/2008008	0	0	334	i
GO:0060968	regulation of gene silencing	94/253	130324/2008008	0	0	94	i
GO:0060964	regulation of gene silencing by miRNA	93/171	130324/2008008	0	0	93	i
GO:0060966	regulation of gene silencing by RNA	93/190	130324/2008008	0	0	93	i
GO:1901532	regulation of hematopoietic progenitor cell differentiation	93/120	130324/2008008	0	0	93	i
GO:1902036	regulation of hematopoietic stem cell differentiation	93/120	130324/2008008	0	0	93	i
GO:0045652	regulation of megakaryocyte differentiation	93/136	130324/2008008	0	0	93	i
GO:0060147	regulation of posttranscriptional gene silencing	93/190	130324/2008008	0	0	93	i
GO:2000736	regulation of stem cell differentiation	93/153	130324/2008008	0	0	93	i
GO:0098760	response to interleukin-7	22/36	130324/2008008	0	0	22	i
GO:0048863	stem cell differentiation	93/496	130324/2008008	0	0	93	i
GO:0032200	telomere organization	96/210	130324/2008008	0	0	96	i
GO:0015701	bicarbonate transport	3/15	121/8320.5	0.00120117	0.00888863	3	i
GO:0042744	hydrogen peroxide catabolic process	3/6	121/8320.5	5.81093e-05	0.000716682	3	i
GO:0042743	hydrogen peroxide metabolic process	3/10	121/8320.5	0.000334093	0.00309036	3	i
GO:0072593	reactive oxygen species metabolic process	3/28	121/8320.5	0.00753777	0.0464829	3	i
GO:0048483	autonomic nervous system development	3/55	3102/803912	0.00129628	0.00446163	3	ii
GO:0051216	cartilage development	6/190	3102/803912	0.000108283	0.00047135	6	ii
GO:0042742	defense response to bacterium	8/378	3102/803912	0.000132886	0.000537895	8	ii
GO:0048706	embryonic skeletal system development	3/210	3102/803912	0.048558	0.133085	3	ii
GO:0006959	humoral immune response	10/595	3102/803912	0.000134474	0.000537895	10	ii
	new pathways that are not present in controls but present in advanced stages (3 and 4)
GO:0002065	columnar/cuboidal epithelial cell differentiation	3/136	2847/805180.5	0.012778	0.041848	3	iii
GO:0048706	embryonic skeletal system development	3/210	2847/805180.5	0.0392052	0.125265	3	iii
GO:0015701	bicarbonate transport	4/21	1007/23544.5	0.0111218	0.111218	4	iii
GO:0042744	hydrogen peroxide catabolic process	3/6	1007/23544.5	0.00141554	0.0247719	3	iii
GO:0042743	hydrogen peroxide metabolic process	3/15	1007/23544.5	0.0241464	0.187805	3	iii
GO:0050805	negative regulation of synaptic transmission	4/15	1007/23544.5	0.00310986	0.0362817	4	iii
GO:0090066	regulation of anatomical structure size	13/120	1007/23544.5	0.00189125	0.0264775	13	iii
GO:0042391	regulation of membrane potential	14/78	1007/23544.5	4.98005e-06	0.000348604	14	iii
GO:0003333	amino acid transmembrane transport	8/66	14427/601704.5	0.000181493	0.000389873	8	iv
GO:0048736	appendage development	20/351	14427/601704.5	0.00038992	0.000788908	20	iv
GO:0035107	appendage morphogenesis	15/253	14427/601704.5	0.00132894	0.00251342	15	iv
GO:0071804	cellular potassium ion transport	14/210	14427/601704.5	0.000617747	0.00122145	14	iv
GO:0021953	central nervous system neuron differentiation	35/276	14427/601704.5	1.77636e-15	4.90613e-15	35	iv
GO:0061640	cytoskeleton-dependent cytokinesis	36/45	14427/601704.5	0	0	36	iv
GO:0048565	digestive tract development	9/190	14427/601704.5	0.0408557	0.067065	9	iv
GO:0009953	dorsal/ventral pattern formation	7/78	14427/601704.5	0.00272207	0.00493375	7	iv
GO:0031018	endocrine pancreas development	4/55	14427/601704.5	0.0428918	0.0691034	4	iv
GO:0021872	forebrain generation of neurons	14/66	14427/601704.5	4.94299e-10	1.22869e-09	14	iv
GO:0021879	forebrain neuron differentiation	14/55	14427/601704.5	3.5604e-11	9.11043e-11	14	iv
GO:0002067	glandular epithelial cell differentiation	4/55	14427/601704.5	0.0428918	0.0691034	4	iv
GO:0035404	histone-serine phosphorylation	3/10	14427/601704.5	0.00145721	0.00272638	3	iv
GO:0030073	insulin secretion	10/210	14427/601704.5	0.0313186	0.0534258	10	iv
GO:0060173	limb development	20/351	14427/601704.5	0.00038992	0.000788908	20	iv
GO:0035108	limb morphogenesis	15/253	14427/601704.5	0.00132894	0.00251342	15	iv
GO:0000281	mitotic cytokinesis	28/36	14427/601704.5	0	0	28	iv
GO:0000022	mitotic spindle elongation	6/10	14427/601704.5	3.66858e-08	8.86573e-08	6	iv
GO:0021675	nerve development	7/78	14427/601704.5	0.00272207	0.00493375	7	iv
GO:0048857	neural nucleus development	10/45	14427/601704.5	9.26308e-08	2.17808e-07	10	iv
GO:0048663	neuron fate commitment	9/120	14427/601704.5	0.00251243	0.00465068	9	iv
GO:0021772	olfactory bulb development	4/36	14427/601704.5	0.0105591	0.0183728	4	iv
GO:0021988	olfactory lobe development	4/36	14427/601704.5	0.0105591	0.0183728	4	iv
GO:0021543	pallium development	13/190	14427/601704.5	0.000747924	0.00146223	13	iv
GO:0010720	positive regulation of cell development	53/780	14427/601704.5	3.06217e-11	7.95251e-11	53	iv
GO:0051962	positive regulation of nervous system development	64/741	14427/601704.5	0	0	64	iv
GO:0071805	potassium ion transmembrane transport	14/210	14427/601704.5	0.000617747	0.00122145	14	iv
GO:0021510	spinal cord development	10/153	14427/601704.5	0.00404244	0.00725139	10	iv

## Sheet: STAD_Stage
ID	Description	GPRatio	BgRatio	pvalue	p.adjust	GOcount	Stages
	new pathways that are not present in controls but present in earlier stages (1 and 2)
GO:0006953	acute-phase response	8/45	3717/226464.5	6.56147e-07	3.36275e-06	8	i
GO:0072378	blood coagulation, fibrin clot formation	13/21	3717/226464.5	0	0	13	i
GO:0007597	blood coagulation, intrinsic pathway	4/10	3717/226464.5	1.40585e-05	6.5874e-05	4	i
GO:0030574	collagen catabolic process	6/66	3717/226464.5	0.000763078	0.00320884	6	i
GO:0032963	collagen metabolic process	6/78	3717/226464.5	0.00182692	0.00624197	6	i
GO:0019835	cytolysis	10/45	3717/226464.5	2.64934e-09	1.40159e-08	10	i
GO:0044364	disruption of cells of other organism	2/21	3717/226464.5	0.0460145	0.142384	2	i
GO:0030198	extracellular matrix organization	18/406	3717/226464.5	0.000171437	0.000759885	18	i
GO:0043062	extracellular structure organization	18/406	3717/226464.5	0.000171437	0.000759885	18	i
GO:0042730	fibrinolysis	10/28	3717/226464.5	1.40505e-11	7.68096e-11	10	i
GO:0031640	killing of cells of other organism	2/21	3717/226464.5	0.0460145	0.142384	2	i
GO:0044236	multicellular organism metabolic process	6/78	3717/226464.5	0.00182692	0.00624197	6	i
GO:0044243	multicellular organismal catabolic process	6/66	3717/226464.5	0.000763078	0.00320884	6	i
GO:0044259	multicellular organismal macromolecule metabolic process	6/78	3717/226464.5	0.00182692	0.00624197	6	i
GO:0030195	negative regulation of blood coagulation	21/55	3717/226464.5	0	0	21	i
GO:0050819	negative regulation of coagulation	21/55	3717/226464.5	0	0	21	i
GO:0051918	negative regulation of fibrinolysis	3/15	3717/226464.5	0.00173396	0.00624197	3	i
GO:1900047	negative regulation of hemostasis	21/55	3717/226464.5	0	0	21	i
GO:1903035	negative regulation of response to wounding	21/66	3717/226464.5	0	0	21	i
GO:0061045	negative regulation of wound healing	21/55	3717/226464.5	0	0	21	i
GO:0031639	plasminogen activation	5/15	3717/226464.5	3.10984e-06	1.50004e-05	5	i
GO:0002576	platelet degranulation	16/66	3717/226464.5	1.06581e-14	6.56776e-14	16	i
GO:0030194	positive regulation of blood coagulation	3/15	3717/226464.5	0.00173396	0.00624197	3	i
GO:0050820	positive regulation of coagulation	3/15	3717/226464.5	0.00173396	0.00624197	3	i
GO:0045919	positive regulation of cytolysis	2/6	3717/226464.5	0.0038663	0.0129403	2	i
GO:1900048	positive regulation of hemostasis	3/15	3717/226464.5	0.00173396	0.00624197	3	i
GO:0090303	positive regulation of wound healing	6/21	3717/226464.5	8.55023e-07	4.24921e-06	6	i
GO:0030193	regulation of blood coagulation	28/66	3717/226464.5	0	0	28	i
GO:0050818	regulation of coagulation	28/66	3717/226464.5	0	0	28	i
GO:0042268	regulation of cytolysis	2/15	3717/226464.5	0.0245411	0.0789163	2	i
GO:0051917	regulation of fibrinolysis	3/15	3717/226464.5	0.00173396	0.00624197	3	i
GO:1900046	regulation of hemostasis	28/66	3717/226464.5	0	0	28	i
GO:1903034	regulation of response to wounding	28/78	3717/226464.5	0	0	28	i
GO:0061041	regulation of wound healing	28/66	3717/226464.5	0	0	28	i
GO:0001501	skeletal system development	16/496	3717/226464.5	0.00894264	0.0293319	16	i
GO:0048705	skeletal system morphogenesis	9/153	3717/226464.5	0.00103146	0.00422899	9	i
GO:0051051	negative regulation of transport	53/351	15338/224450	5.72334e-08	1.04146e-07	53	i
GO:0050867	positive regulation of cell activation	150/378	15338/224450	0	0	150	i
GO:0002696	positive regulation of leukocyte activation	150/378	15338/224450	0	0	150	i
GO:0051251	positive regulation of lymphocyte activation	150/378	15338/224450	0	0	150	i
GO:0051249	regulation of lymphocyte activation	174/496	15338/224450	0	0	174	i
GO:0051216	cartilage development	10/78	1892/219122	1.66292e-09	4.31453e-08	10	ii
GO:0070098	chemokine-mediated signaling pathway	4/45	1892/219122	0.000622733	0.00450284	4	ii
GO:0048706	embryonic skeletal system development	3/55	1892/219122	0.0120799	0.0709697	3	ii
GO:0010524	positive regulation of calcium ion transport into cytosol	3/21	1892/219122	0.000760945	0.00476859	3	ii
GO:0032846	positive regulation of homeostatic process	4/105	1892/219122	0.0133103	0.073598	4	ii
GO:0002690	positive regulation of leukocyte chemotaxis	4/36	1892/219122	0.000261838	0.00205106	4	ii
GO:0051281	positive regulation of release of sequestered calcium ion into cytosol	3/21	1892/219122	0.000760945	0.00476859	3	ii
GO:0032103	positive regulation of response to external stimulus	7/120	1892/219122	9.01637e-05	0.000847539	7	ii
GO:0010818	T cell chemotaxis	3/10	1892/219122	7.37071e-05	0.00076983	3	ii
	new pathways that are not present in controls but present in advanced stages (3 and 4)
GO:0006953	acute-phase response	2/21	572/178204.5	0.00207416	0.0117129	2	iii
GO:0035107	appendage morphogenesis	2/91	572/178204.5	0.0349065	0.0985596	2	iii
GO:0051216	cartilage development	5/78	572/178204.5	5.8257e-06	6.21408e-05	5	iii
GO:0045165	cell fate commitment	3/153	572/178204.5	0.0134954	0.054599	3	iii
GO:0021953	central nervous system neuron differentiation	4/105	572/178204.5	0.000388502	0.00233101	4	iii
GO:0021892	cerebral cortex GABAergic interneuron differentiation	1/10	572/178204.5	0.031639	0.0985596	1	iii
GO:0021895	cerebral cortex neuron differentiation	1/10	572/178204.5	0.031639	0.0985596	1	iii
GO:0070098	chemokine-mediated signaling pathway	4/45	572/178204.5	1.4098e-05	0.000123037	4	iii
GO:0030574	collagen catabolic process	10/66	572/178204.5	1.93179e-14	4.63629e-13	10	iii
GO:0032963	collagen metabolic process	10/78	572/178204.5	1.11022e-13	1.52259e-12	10	iii
GO:0061448	connective tissue development	5/91	572/178204.5	1.24002e-05	0.000119042	5	iii
GO:0035113	embryonic appendage morphogenesis	2/91	572/178204.5	0.0349065	0.0985596	2	iii
GO:0030326	embryonic limb morphogenesis	2/91	572/178204.5	0.0349065	0.0985596	2	iii
GO:0030198	extracellular matrix organization	18/300	572/178204.5	0	0	18	iii
GO:0043062	extracellular structure organization	18/300	572/178204.5	0	0	18	iii
GO:0021879	forebrain neuron differentiation	3/21	572/178204.5	4.19072e-05	0.000287363	3	iii
GO:0021877	forebrain neuron fate commitment	1/10	572/178204.5	0.031639	0.0985596	1	iii
GO:0097154	GABAergic neuron differentiation	1/15	572/178204.5	0.0470817	0.129138	1	iii
GO:0035108	limb morphogenesis	2/91	572/178204.5	0.0349065	0.0985596	2	iii
GO:0007498	mesoderm development	2/55	572/178204.5	0.0136498	0.054599	2	iii
GO:0044236	multicellular organism metabolic process	10/78	572/178204.5	1.11022e-13	1.52259e-12	10	iii
GO:0044243	multicellular organismal catabolic process	10/66	572/178204.5	1.93179e-14	4.63629e-13	10	iii
GO:0044259	multicellular organismal macromolecule metabolic process	10/78	572/178204.5	1.11022e-13	1.52259e-12	10	iii
GO:0048663	neuron fate commitment	2/55	572/178204.5	0.0136498	0.054599	2	iii
GO:0007389	pattern specification process	7/703	572/178204.5	0.00824066	0.041637	7	iii
GO:0010524	positive regulation of calcium ion transport into cytosol	3/21	572/178204.5	4.19072e-05	0.000287363	3	iii
GO:0002690	positive regulation of leukocyte chemotaxis	3/36	572/178204.5	0.000217059	0.00138917	3	iii
GO:0051281	positive regulation of release of sequestered calcium ion into cytosol	3/21	572/178204.5	4.19072e-05	0.000287363	3	iii
GO:0009954	proximal/distal pattern formation	2/55	572/178204.5	0.0136498	0.054599	2	iii
GO:0003002	regionalization	7/630	572/178204.5	0.00463948	0.0247439	7	iii
GO:0060850	regulation of transcription involved in cell fate commitment	1/10	572/178204.5	0.031639	0.0985596	1	iii
GO:0001501	skeletal system development	11/528	572/178204.5	1.53284e-06	1.83941e-05	11	iii
GO:0048705	skeletal system morphogenesis	3/136	572/178204.5	0.00983898	0.0472271	3	iii
GO:0021544	subpallium development	1/10	572/178204.5	0.031639	0.0985596	1	iii
GO:0060065	uterus development	1/10	572/178204.5	0.031639	0.0985596	1	iii
GO:0042632	cholesterol homeostasis	5/36	7295/276768	0.00242388	0.00550881	5	iii
GO:0098810	neurotransmitter reuptake	2/10	7295/276768	0.0271572	0.0558025	2	iii
GO:0055092	sterol homeostasis	5/36	7295/276768	0.00242388	0.00550881	5	iii
GO:0060326	cell chemotaxis	6/120	952/127008	0.000308982	0.00437329	6	iv
GO:0030199	collagen fibril organization	3/15	952/127008	0.000178583	0.00298721	3	iv
GO:0071621	granulocyte chemotaxis	2/36	952/127008	0.0298847	0.189613	2	iv
GO:0097530	granulocyte migration	2/45	952/127008	0.0449442	0.243227	2	iv
GO:0030595	leukocyte chemotaxis	3/66	952/127008	0.0135392	0.0922673	3	iv
GO:0030593	neutrophil chemotaxis	2/36	952/127008	0.0298847	0.189613	2	iv
GO:1990266	neutrophil migration	2/45	952/127008	0.0449442	0.243227	2	iv
GO:0030335	positive regulation of cell migration	4/171	952/127008	0.0405538	0.233184	4	iv
GO:2000147	positive regulation of cell motility	4/171	952/127008	0.0405538	0.233184	4	iv
GO:0051272	positive regulation of cellular component movement	4/171	952/127008	0.0405538	0.233184	4	iv
GO:0050921	positive regulation of chemotaxis	3/45	952/127008	0.00471329	0.0390908	3	iv
GO:0071624	positive regulation of granulocyte chemotaxis	2/15	952/127008	0.00552369	0.0390908	2	iv
GO:0002687	positive regulation of leukocyte migration	3/36	952/127008	0.00249286	0.0254826	3	iv
GO:0090023	positive regulation of neutrophil chemotaxis	2/15	952/127008	0.00552369	0.0390908	2	iv
GO:1902624	positive regulation of neutrophil migration	2/15	952/127008	0.00552369	0.0390908	2	iv
GO:0071622	regulation of granulocyte chemotaxis	2/15	952/127008	0.00552369	0.0390908	2	iv
GO:0002688	regulation of leukocyte chemotaxis	3/36	952/127008	0.00249286	0.0254826	3	iv
GO:0090022	regulation of neutrophil chemotaxis	2/15	952/127008	0.00552369	0.0390908	2	iv
GO:1902622	regulation of neutrophil migration	2/15	952/127008	0.00552369	0.0390908	2	iv
GO:0019722	calcium-mediated signaling	9/120	13429/440860.5	0.0114172	0.0375731	9	iv
GO:0071804	cellular potassium ion transport	14/190	13429/440860.5	0.00222362	0.00951989	14	iv
GO:0009812	flavonoid metabolic process	2/10	13429/440860.5	0.0354856	0.101282	2	iv
GO:0031069	hair follicle morphogenesis	3/15	13429/440860.5	0.00976761	0.0332225	3	iv
GO:0071805	potassium ion transmembrane transport	14/190	13429/440860.5	0.00222362	0.00951989	14	iv
GO:1901019	regulation of calcium ion transmembrane transporter activity	8/66	13429/440860.5	0.000880494	0.00402092	8	iv
GO:0032412	regulation of ion transmembrane transporter activity	17/190	13429/440860.5	8.25592e-05	0.000418911	17	iv
GO:0010880	regulation of release of sequestered calcium ion into cytosol by sarcoplasmic reticulum	4/21	13429/440860.5	0.00339881	0.0129344	4	iv
GO:0022898	regulation of transmembrane transporter activity	17/190	13429/440860.5	8.25592e-05	0.000418911	17	iv
GO:1903514	release of sequestered calcium ion into cytosol by endoplasmic reticulum	4/21	13429/440860.5	0.00339881	0.0129344	4	iv
GO:0014808	release of sequestered calcium ion into cytosol by sarcoplasmic reticulum	4/21	13429/440860.5	0.00339881	0.0129344	4	iv
GO:0035725	sodium ion transmembrane transport	8/120	13429/440860.5	0.0308924	0.0891001	8	iv

## Sheet: THCA_Stage
ID	Description	GPRatio	BgRatio	pvalue	p.adjust	GOcount	Stages
	new pathways that are not present in controls but present in earlier stages (1 and 2)
GO:0019731	antibacterial humoral response	2/36	3651/398724.5	0.0430025	0.106457	2	i
GO:0019730	antimicrobial humoral response	6/153	3651/398724.5	0.00302406	0.00944436	6	i
GO:0033627	cell adhesion mediated by integrin	3/45	3651/398724.5	0.00817443	0.023372	3	i
GO:0034330	cell junction organization	20/231	3651/398724.5	8.59313e-14	9.18108e-13	20	i
GO:0098742	cell-cell adhesion via plasma-membrane adhesion molecules	12/435	3651/398724.5	0.000817714	0.00296421	12	i
GO:0031589	cell-substrate adhesion	18/300	3651/398724.5	6.17867e-10	3.92675e-09	18	i
GO:0016101	diterpenoid metabolic process	4/105	3651/398724.5	0.0161712	0.0415539	4	i
GO:0001958	endochondral ossification	2/21	3651/398724.5	0.0156831	0.0415539	2	i
GO:0009913	epidermal cell differentiation	21/630	3651/398724.5	6.42394e-07	3.26015e-06	21	i
GO:0061436	establishment of skin barrier	2/21	3651/398724.5	0.0156831	0.0415539	2	i
GO:0042730	fibrinolysis	11/45	3651/398724.5	2.85216e-13	2.75709e-12	11	i
GO:0006720	isoprenoid metabolic process	4/120	3651/398724.5	0.0249895	0.0626279	4	i
GO:0031424	keratinization	13/406	3651/398724.5	0.00012221	0.00049443	13	i
GO:0030195	negative regulation of blood coagulation	16/78	3651/398724.5	0	0	16	i
GO:0097756	negative regulation of blood vessel diameter	3/66	3651/398724.5	0.0228942	0.0580942	3	i
GO:0007162	negative regulation of cell adhesion	18/300	3651/398724.5	6.17867e-10	3.92675e-09	18	i
GO:0050819	negative regulation of coagulation	16/78	3651/398724.5	0	0	16	i
GO:1900047	negative regulation of hemostasis	16/78	3651/398724.5	0	0	16	i
GO:0051346	negative regulation of hydrolase activity	21/666	3651/398724.5	1.5414e-06	7.63181e-06	21	i
GO:0010466	negative regulation of peptidase activity	17/406	3651/398724.5	3.36683e-07	1.75248e-06	17	i
GO:0045861	negative regulation of proteolysis	24/528	3651/398724.5	2.85572e-10	2.0704e-09	24	i
GO:1903035	negative regulation of response to wounding	16/120	3651/398724.5	2.9976e-14	3.57949e-13	16	i
GO:0061045	negative regulation of wound healing	16/105	3651/398724.5	3.44169e-15	4.65776e-14	16	i
GO:0042119	neutrophil activation	39/595	3651/398724.5	0	0	39	i
GO:0002283	neutrophil activation involved in immune response	39/561	3651/398724.5	0	0	39	i
GO:0043312	neutrophil degranulation	39/561	3651/398724.5	0	0	39	i
GO:0031639	plasminogen activation	6/15	3651/398724.5	2.7374e-09	1.68391e-08	6	i
GO:0002576	platelet degranulation	26/105	3651/398724.5	0	0	26	i
GO:0070374	positive regulation of ERK1 and ERK2 cascade	7/171	3651/398724.5	0.00109323	0.00369875	7	i
GO:0045907	positive regulation of vasoconstriction	3/28	3651/398724.5	0.0021177	0.00682369	3	i
GO:0043687	post-translational protein modification	24/595	3651/398724.5	2.97841e-09	1.77829e-08	24	i
GO:0090066	regulation of anatomical structure size	14/630	3651/398724.5	0.00242785	0.00770083	14	i
GO:0030193	regulation of blood coagulation	16/91	3651/398724.5	3.33067e-16	5.20097e-15	16	i
GO:0097746	regulation of blood vessel diameter	6/105	3651/398724.5	0.000436433	0.00161083	6	i
GO:0050880	regulation of blood vessel size	6/105	3651/398724.5	0.000436433	0.00161083	6	i
GO:0010769	regulation of cell morphogenesis involved in differentiation	13/351	3651/398724.5	2.82711e-05	0.000122314	13	i
GO:0050818	regulation of coagulation	16/91	3651/398724.5	3.33067e-16	5.20097e-15	16	i
GO:1900046	regulation of hemostasis	16/91	3651/398724.5	3.33067e-16	5.20097e-15	16	i
GO:1903034	regulation of response to wounding	16/153	3651/398724.5	1.392e-12	1.28443e-11	16	i
GO:0035296	regulation of tube diameter	6/105	3651/398724.5	0.000436433	0.00161083	6	i
GO:0035150	regulation of tube size	6/105	3651/398724.5	0.000436433	0.00161083	6	i
GO:0019229	regulation of vasoconstriction	3/45	3651/398724.5	0.00817443	0.023372	3	i
GO:0033561	regulation of water loss via skin	2/21	3651/398724.5	0.0156831	0.0415539	2	i
GO:0061041	regulation of wound healing	16/136	3651/398724.5	2.20046e-13	2.23347e-12	16	i
GO:0036075	replacement ossification	2/21	3651/398724.5	0.0156831	0.0415539	2	i
GO:0070555	response to interleukin-1	4/78	3651/398724.5	0.00585067	0.0172128	4	i
GO:0001523	retinoid metabolic process	4/105	3651/398724.5	0.0161712	0.0415539	4	i
GO:0006721	terpenoid metabolic process	4/105	3651/398724.5	0.0161712	0.0415539	4	i
GO:0003018	vascular process in circulatory system	6/120	3651/398724.5	0.000882266	0.00305707	6	i
GO:0042310	vasoconstriction	3/55	3651/398724.5	0.0141291	0.0398363	3	i
GO:0045216	cell-cell junction organization	11/153	7835/219122	0.0221351	0.113627	11	ii
GO:0010975	regulation of neuron projection development	29/465	7835/219122	0.00309242	0.021647	29	ii
GO:0007416	synapse assembly	13/91	7835/219122	2.18114e-05	0.000209935	13	ii
GO:0002287	alpha-beta T cell activation involved in immune response	10/28	9125/119072	2.50962e-05	8.74712e-05	10	ii
GO:0002293	alpha-beta T cell differentiation involved in immune response	10/28	9125/119072	2.50962e-05	8.74712e-05	10	ii
GO:0097553	calcium ion transmembrane import into cytosol	8/36	9125/119072	0.00512705	0.0132418	8	ii
GO:0060402	calcium ion transport into cytosol	11/55	9125/119072	0.00270749	0.00803296	11	ii
GO:0035710	CD4-positive, alpha-beta T cell activation	6/28	9125/119072	0.0175533	0.0425785	6	ii
GO:0043367	CD4-positive, alpha-beta T cell differentiation	6/28	9125/119072	0.0175533	0.0425785	6	ii
GO:0002294	CD4-positive, alpha-beta T cell differentiation involved in immune response	6/21	9125/119072	0.0040086	0.0116614	6	ii
GO:0036037	CD8-positive, alpha-beta T cell activation	3/6	9125/119072	0.00754038	0.0190634	3	ii
GO:0043374	CD8-positive, alpha-beta T cell differentiation	3/6	9125/119072	0.00754038	0.0190634	3	ii
GO:0006968	cellular defense response	7/21	9125/119072	0.000687409	0.00218389	7	ii
GO:0070098	chemokine-mediated signaling pathway	8/28	9125/119072	0.000912485	0.00287353	8	ii
GO:0042089	cytokine biosynthetic process	7/36	9125/119072	0.0179522	0.042681	7	ii
GO:0060401	cytosolic calcium ion transport	11/55	9125/119072	0.00270749	0.00803296	11	ii
GO:0002431	Fc receptor mediated stimulatory signaling pathway	39/78	9125/119072	0	0	39	ii
GO:0038093	Fc receptor signaling pathway	47/105	9125/119072	0	0	47	ii
GO:0038095	Fc-epsilon receptor signaling pathway	33/66	9125/119072	0	0	33	ii
GO:0038094	Fc-gamma receptor signaling pathway	39/66	9125/119072	0	0	39	ii
GO:0038096	Fc-gamma receptor signaling pathway involved in phagocytosis	39/66	9125/119072	0	0	39	ii
GO:0048872	homeostasis of number of cells	19/91	9125/119072	5.20105e-05	0.000179536	19	ii
GO:0002433	immune response-regulating cell surface receptor signaling pathway involved in phagocytosis	39/66	9125/119072	0	0	39	ii
GO:0002285	lymphocyte activation involved in immune response	15/55	9125/119072	1.12914e-05	4.29913e-05	15	ii
GO:0010324	membrane invagination	21/45	9125/119072	2.24865e-12	1.55243e-11	21	ii
GO:0051283	negative regulation of sequestering of calcium ion	8/36	9125/119072	0.00512705	0.0132418	8	ii
GO:0015671	oxygen transport	3/10	9125/119072	0.0358696	0.0785195	3	ii
GO:0099024	plasma membrane invagination	21/45	9125/119072	2.24865e-12	1.55243e-11	21	ii
GO:0001819	positive regulation of cytokine production	87/276	9125/119072	0	0	87	ii
GO:0031349	positive regulation of defense response	42/231	9125/119072	1.50783e-07	7.4152e-07	42	ii
GO:0002863	positive regulation of inflammatory response to antigenic stimulus	3/6	9125/119072	0.00754038	0.0190634	3	ii
GO:0045089	positive regulation of innate immune response	21/136	9125/119072	0.00163269	0.00505288	21	ii
GO:0032729	positive regulation of interferon-gamma production	8/36	9125/119072	0.00512705	0.0132418	8	ii
GO:0032103	positive regulation of response to external stimulus	13/91	9125/119072	0.0213189	0.0487484	13	ii
GO:0043368	positive T cell selection	10/21	9125/119072	1.11223e-06	4.64293e-06	10	ii
GO:0043491	protein kinase B signaling	14/91	9125/119072	0.00933223	0.0231053	14	ii
GO:0002819	regulation of adaptive immune response	15/105	9125/119072	0.0141116	0.0346991	15	ii
GO:0042035	regulation of cytokine biosynthetic process	7/36	9125/119072	0.0179522	0.042681	7	ii
GO:0050707	regulation of cytokine secretion	9/55	9125/119072	0.0231404	0.0525786	9	ii
GO:0002861	regulation of inflammatory response to antigenic stimulus	3/10	9125/119072	0.0358696	0.0785195	3	ii
GO:0045088	regulation of innate immune response	26/171	9125/119072	0.000628848	0.00203384	26	ii
GO:0032673	regulation of interleukin-4 production	3/10	9125/119072	0.0358696	0.0785195	3	ii
GO:0051896	regulation of protein kinase B signaling	14/91	9125/119072	0.00933223	0.0231053	14	ii
GO:0051282	regulation of sequestering of calcium ion	8/36	9125/119072	0.00512705	0.0132418	8	ii
GO:0051209	release of sequestered calcium ion into cytosol	8/36	9125/119072	0.00512705	0.0132418	8	ii
GO:0051208	sequestering of calcium ion	8/36	9125/119072	0.00512705	0.0132418	8	ii
GO:0002286	T cell activation involved in immune response	10/28	9125/119072	2.50962e-05	8.74712e-05	10	ii
GO:0002292	T cell differentiation involved in immune response	10/28	9125/119072	2.50962e-05	8.74712e-05	10	ii
GO:0042093	T-helper cell differentiation	4/15	9125/119072	0.0237055	0.0535238	4	ii
	new pathways that are not present in controls but present in advanced stages (3 and 4)
GO:0001667	ameboidal-type cell migration	21/378	5109/407704.5	2.31126e-08	7.61356e-08	21	iii
GO:0019730	antimicrobial humoral response	6/190	5109/407704.5	0.0335294	0.0678668	6	iii
GO:0033627	cell adhesion mediated by integrin	5/36	5109/407704.5	8.41201e-05	0.000227938	5	iii
GO:0034330	cell junction organization	33/253	5109/407704.5	0	0	33	iii
GO:0098742	cell-cell adhesion via plasma-membrane adhesion molecules	14/465	5109/407704.5	0.00261222	0.00626932	14	iii
GO:0031589	cell-substrate adhesion	27/465	5109/407704.5	9.40819e-11	3.59222e-10	27	iii
GO:0060350	endochondral bone morphogenesis	5/36	5109/407704.5	8.41201e-05	0.000227938	5	iii
GO:0001958	endochondral ossification	3/28	5109/407704.5	0.00509787	0.0115735	3	iii
GO:0035987	endodermal cell differentiation	3/55	5109/407704.5	0.0318446	0.066048	3	iii
GO:0009913	epidermal cell differentiation	73/1081	5109/407704.5	0	0	73	iii
GO:0042730	fibrinolysis	12/55	5109/407704.5	3.94529e-12	1.61661e-11	12	iii
GO:0042633	hair cycle	6/136	5109/407704.5	0.00763288	0.0168727	6	iii
GO:0031581	hemidesmosome assembly	4/15	5109/407704.5	3.0102e-05	8.57141e-05	4	iii
GO:0007156	homophilic cell adhesion via plasma membrane adhesion molecules	6/190	5109/407704.5	0.0335294	0.0678668	6	iii
GO:0045104	intermediate filament cytoskeleton organization	9/45	5109/407704.5	4.46415e-09	1.56245e-08	9	iii
GO:0045103	intermediate filament-based process	9/45	5109/407704.5	4.46415e-09	1.56245e-08	9	iii
GO:0031424	keratinization	48/666	5109/407704.5	0	0	48	iii
GO:0042303	molting cycle	6/136	5109/407704.5	0.00763288	0.0168727	6	iii
GO:0030195	negative regulation of blood coagulation	17/91	5109/407704.5	2.22045e-15	1.24345e-14	17	iii
GO:0007162	negative regulation of cell adhesion	18/300	5109/407704.5	7.18643e-08	2.32177e-07	18	iii
GO:0050819	negative regulation of coagulation	17/91	5109/407704.5	2.22045e-15	1.24345e-14	17	iii
GO:1900047	negative regulation of hemostasis	17/91	5109/407704.5	2.22045e-15	1.24345e-14	17	iii
GO:0051346	negative regulation of hydrolase activity	39/741	5109/407704.5	1.65867e-13	7.33308e-13	39	iii
GO:0010466	negative regulation of peptidase activity	32/465	5109/407704.5	1.89848e-14	8.85958e-14	32	iii
GO:0045861	negative regulation of proteolysis	39/595	5109/407704.5	2.22045e-16	1.55431e-15	39	iii
GO:1903035	negative regulation of response to wounding	17/153	5109/407704.5	1.39073e-11	5.43356e-11	17	iii
GO:0061045	negative regulation of wound healing	17/120	5109/407704.5	2.5302e-13	1.06268e-12	17	iii
GO:0042119	neutrophil activation	42/666	5109/407704.5	0	0	42	iii
GO:0002283	neutrophil activation involved in immune response	41/595	5109/407704.5	0	0	41	iii
GO:0043312	neutrophil degranulation	41/595	5109/407704.5	0	0	41	iii
GO:0018149	peptide cross-linking	5/45	5109/407704.5	0.000248319	0.000632084	5	iii
GO:0002576	platelet degranulation	33/136	5109/407704.5	0	0	33	iii
GO:1903524	positive regulation of blood circulation	3/45	5109/407704.5	0.0188737	0.0401365	3	iii
GO:0010811	positive regulation of cell-substrate adhesion	8/78	5109/407704.5	6.50667e-06	1.952e-05	8	iii
GO:0045907	positive regulation of vasoconstriction	3/28	5109/407704.5	0.00509787	0.0115735	3	iii
GO:0043687	post-translational protein modification	36/820	5109/407704.5	2.13192e-10	7.95918e-10	36	iii
GO:0030193	regulation of blood coagulation	17/91	5109/407704.5	2.22045e-15	1.24345e-14	17	iii
GO:0010769	regulation of cell morphogenesis involved in differentiation	11/325	5109/407704.5	0.00301695	0.00713871	11	iii
GO:0010810	regulation of cell-substrate adhesion	15/171	5109/407704.5	5.88259e-09	2.01689e-08	15	iii
GO:0050818	regulation of coagulation	17/91	5109/407704.5	2.22045e-15	1.24345e-14	17	iii
GO:0045682	regulation of epidermis development	6/66	5109/407704.5	0.000184466	0.000476775	6	iii
GO:1900046	regulation of hemostasis	17/91	5109/407704.5	2.22045e-15	1.24345e-14	17	iii
GO:1903034	regulation of response to wounding	17/153	5109/407704.5	1.39073e-11	5.43356e-11	17	iii
GO:0019229	regulation of vasoconstriction	3/45	5109/407704.5	0.0188737	0.0401365	3	iii
GO:0061041	regulation of wound healing	17/120	5109/407704.5	2.5302e-13	1.06268e-12	17	iii
GO:0036075	replacement ossification	3/28	5109/407704.5	0.00509787	0.0115735	3	iii
GO:0042310	vasoconstriction	3/55	5109/407704.5	0.0318446	0.066048	3	iii
GO:0031638	zymogen activation	6/28	5109/407704.5	1.14791e-06	3.50635e-06	6	iii
GO:0007588	excretion	3/15	2074/41760.5	0.0355542	0.287989	3	iii
GO:0055067	monovalent inorganic cation homeostasis	8/28	2074/41760.5	4.64225e-05	0.00107435	8	iii
GO:0015711	organic anion transport	16/105	2074/41760.5	6.1146e-05	0.00123821	16	iii
GO:0050855	regulation of B cell receptor signaling pathway	6/10	2074/41760.5	2.63152e-06	8.52612e-05	6	iii
GO:0060349	bone morphogenesis	5/66	3449/434312	0.000188265	0.000941327	5	iv
GO:0051806	entry into cell of other organism involved in symbiotic interaction	4/105	3449/434312	0.0100671	0.0331999	4	iv
GO:0044409	entry into host	4/105	3449/434312	0.0100671	0.0331999	4	iv
GO:0030260	entry into host cell	4/105	3449/434312	0.0100671	0.0331999	4	iv
GO:0051828	entry into other organism involved in symbiotic interaction	4/105	3449/434312	0.0100671	0.0331999	4	iv
GO:0061436	establishment of skin barrier	2/36	3449/434312	0.03323	0.0990511	2	iv
GO:0050891	multicellular organismal water homeostasis	2/45	3449/434312	0.0498452	0.137964	2	iv
GO:0050918	positive chemotaxis	2/45	3449/434312	0.0498452	0.137964	2	iv
GO:0033561	regulation of water loss via skin	2/36	3449/434312	0.03323	0.0990511	2	iv
GO:0090596	sensory organ morphogenesis	13/253	3449/434312	1.71382e-07	1.15497e-06	13	iv
GO:0071294	cellular response to zinc ion	3/10	3142/143112.5	0.00113006	0.00440001	3	iv
GO:0002431	Fc receptor mediated stimulatory signaling pathway	47/120	3142/143112.5	0	0	47	iv
GO:0038093	Fc receptor signaling pathway	47/171	3142/143112.5	0	0	47	iv
GO:0038095	Fc-epsilon receptor signaling pathway	47/120	3142/143112.5	0	0	47	iv
GO:0038094	Fc-gamma receptor signaling pathway	47/105	3142/143112.5	0	0	47	iv
GO:0038096	Fc-gamma receptor signaling pathway involved in phagocytosis	47/105	3142/143112.5	0	0	47	iv
GO:0002433	immune response-regulating cell surface receptor signaling pathway involved in phagocytosis	47/105	3142/143112.5	0	0	47	iv
GO:0030073	insulin secretion	7/91	3142/143112.5	0.00397964	0.0140053	7	iv
GO:0010324	membrane invagination	12/45	3142/143112.5	1.80478e-10	7.68082e-10	12	iv
GO:0099024	plasma membrane invagination	12/45	3142/143112.5	1.80478e-10	7.68082e-10	12	iv
GO:0046883	regulation of hormone secretion	7/120	3142/143112.5	0.0170238	0.0546554	7	iv
GO:0050796	regulation of insulin secretion	7/91	3142/143112.5	0.00397964	0.0140053	7	iv
